# Supplementary material for: Neuroglobin-Deficiency Exacerbates Hif1A and c-FOS Response, but Does Not Affect Neuronal Survival during Severe Hypoxia In Vivo
Source: PLoS One. 2011 Dec 2;6(12):e28160. doi: 10.1371/journal.pone.0028160 (PMC3229544; doi:10.1371/journal.pone.0028160)
Supplement: Table S1 — Quantification of c-FOS immunoreactivity in naive, 90 minutes hypoxic and 24 hours hypoxic wt mice and Ngb-deficient mice. (XLS) [file pone.0028160.s002.xls]

## Sheet: c-fos
	c-fos 90 min hypoxia										c-fos 90 min hypoxia										Control			c-fos 3 hours hypoxia
	WT male				KO male						WT female					KO female					KO male	WT male		WT male					KO male
Area	HO-20	HO-21	HO-22	HO-23	HO-24	HO-25	HO-26	HO-27	HO-28	Area	HO-37	HO-38	HO-39	HO-40	HO-41	HO-45	HO-46	HO-47	HO-48	HO-49	HO-55	HO-56	Area	HO-29	HO-30	HO-31	HO-32	HO-33	HO-34	HO-35	HO-36
Cingulate Ctx	++++	++++	++++	++++	++++	+++++	+++++	+++++	+++++	Cingulate Ctx	++	+++	+++	+++	+++	++++	+++	+++	++++	+++	-	-	Cingulate Ctx	+++	+++	+++	+++	+++	+++	++++	++++
Piriform Ctx	++++	++++	++++	++++	+++++	+++++	+++++	+++++	+++++	Piriform Ctx	+++	+++	+++	+++	+++	+++	+++	++++	+++	+++	-	+	Piriform Ctx	++++	+++	+++	+++	++	++++	++++	++++
Parietal Ctx	+++	+++	+++	+++	+++++	+++++	+++++	+++++	+++++	Parietal Ctx	++	+++	+++	+++	+++	++++	++++	+++	++++	++++	-	-	Parietal Ctx	++++	++++	++++	++++	++	+++	++++	+++
Olfactorial Bulb	++++	++++	++	++++	++	++	+++++	missing	+++++	Olfactorial Bulb	++	++	+++	+++	++	+++	++++	missing	++++	++++	-	-	Olfactorial Bulb	missing	++++	++++	missing	missing	missing	missing	missing
LS	+++	+++	++	+++	++	+++	++	+++	++	LS	+++	+++	++	++	+++	+++	++++	++++	++++	++++	-	+	LS	+++++	+++++	+++++	+++++	+++++	+++	+++++	+++++
PVA	++++	++++	++++	++++	+++++	+++++		++++	++++	PVA	+++	+++	+++	+++	+++	+	+++	++	++++	++	++	++	PVA	++++	++++	++++	++++	++++	++++	+++++	+++++
BST	+++	+++	+++	+++	++++	+++	+++	++++	+++	BST	++	++	+	++	+	+	+	++	++	++	-	-	BST	++++	++++	++++	++++	++++	+++	++++	++++
MS	-	+	+	+	-	+		+	-	MS	-	-	-	-	-	++	+	+	+	++	-	-	MS	-	-	-	+	-	+	-	-
Striatum	-	-	-	-	++++	++++	++++	++++	+++	Striatum	-	-	-	-	-	-	-	-	-	-	-	-	Striatum	-	-	+	-	-	+	+	-
Hippocampus	+	+	+	+	++	+++		++	++	Hippocampus	-	+	-	-	-	-	-	-	+	-	-	-	Hippocampus	+	+	+	+	+	+	+	+
SO	-	-	-	+	++++	++++	+++	+++	++++	SO	+++	+++	+++	+++	+++	++	++	++	++	++	-	-	SO	++++	+	+	+	+++	++	++++	+
LH	+++	++	++	++	+++	++		++	+++	LH	+	+	+	+	+	++	++	++	++	++	+	+	LH	++++	+++	++	++	++	++	++	+++
SCN	++++	++++	++++	++++	+++	+++		++++	+++	SCN	++		+	-	++	+	++	-	+++	missing	+++	++	SCN	++++	++++	++++	++++	+++	+++	++++	++++
PVN	+	+	-	+	+++	+++	++	++	+++	PVN	++++	+	++	+++	+++	+++	+++	+++	+++	++++	++	++	PVN	partly missing	++++	++++	++++	+++	++++	++++	++++
CM	+	-	+	+	++	++		++	++	CM	++	+	++	++	+	++	+++	+	+	+	-	-	CM	+++	+++	++	++	++	++	++	++
Hb	-	-	-	-	-	+		-	-	Hb	-	-	-	-	-	-	-	-	-	-	-	-	Hb	-	-	-	-	-	-	-	-
CE	++++	++	++	+++	++++	++++		++++	+++	CE	++	++	++	++	++	++	+++	++	+	+++	-	-	CE	+++	++++	++++	+++	+++	+++	+++	+++
SupColl	++++	++++	++++	++++	+++++	+++++		+++++	++++	SupColl	++	++	++	+++	+++	+++	++	+++	+++	++++	++	++	SupColl	++++	++++	+++	+++	++++	++++	++++	++++
InfColl	++++	++++	++++	++++	++++	++++			++++	InfColl	+++	+++	++	++	++	+++	++++	+++	++	++++	+++	++	InfColl	+++	++++	missing	++++	++++	+++	++++	++++
CG	++++	++++	++++	++++	++	+++		+++	+++	CG	++	+	++	++	++	+	+++	++	++	+++	+	+	CG	+++	+++	++	++	+++	+++	+++	+++
RF	++	+++	+++	+++	+++	+++		+	+	RF	++	+	+	+	+	++	++	++	++	++	++	++	RF	++	++	missing		++	++	++	++
PB	+	++	++	+++	+++	+++		+++	+++	PB	+	++	+	+	+	+	++	+	++	++	+	+	PB	+++	+++	missing	+++	+++	+++	+++	+++
LDTg	+++	+++	+++	+++	+++	+++		+++	+++	LDTg	++	+	+++	+++	+++	missing	+++	+++	+++	+++	+	+	LDTg	+++	++++	missing	++++	+++	++++	++++	+++
PPTg										PPTg													PPTg
