# Supplementary material for: Neuroglobin-Deficiency Exacerbates Hif1A and c-FOS Response, but Does Not Affect Neuronal Survival during Severe Hypoxia In Vivo
Source: PLoS One. 2011 Dec 2;6(12):e28160. doi: 10.1371/journal.pone.0028160 (PMC3229544; doi:10.1371/journal.pone.0028160)
Supplement: Table S3 — Differential expression of transcripts after 90 minutes and 24 hours of hypoxia in Ngb-deficient mice. Differential expression is in relation to naive mice of the same genotype. Data is presented on 4 worksheets entitled according to their contents. Where appropriate, description of the column has been provided as a comment in the column heading. Due to space limitations, only transcripts with adjusted p-value<0.5 are listed. (XLS) [file pone.0028160.s004.xls]

## Sheet: Up_regulated_90min
Transcript ID (Ensembl)	Q&T	T	Q	p-value	Gene Symbol	Gene Description
ENSMUST00000039267	67	260	28309	1.74758e-10	Chd7	chromodomain helicase DNA binding protein 7 Gene [Source:MGI Symbol;Acc:MGI:2444748]
ENSMUST00000051558	67	260	28309	1.74758e-10	Chd7	chromodomain helicase DNA binding protein 7 Gene [Source:MGI Symbol;Acc:MGI:2444748]
ENSMUST00000110354	15	18	28309	1.31242e-09	Srsf5	serine/arginine-rich splicing factor 5 Gene [Source:MGI Symbol;Acc:MGI:98287]
ENSMUST00000115617	15	18	28309	1.31242e-09	Rbm3	RNA binding motif protein 3 Gene [Source:MGI Symbol;Acc:MGI:1099460]
ENSMUST00000110356	14	16	28309	1.8075e-09	Srsf5	serine/arginine-rich splicing factor 5 Gene [Source:MGI Symbol;Acc:MGI:98287]
ENSMUST00000067925	16	22	28309	5.67958e-09	Hmgb2	high mobility group box 2 Gene [Source:MGI Symbol;Acc:MGI:96157]
ENSMUST00000000572	12	13	28309	1.74643e-08	Gabra2	gamma-aminobutyric acid (GABA) A receptor, subunit alpha 2 Gene [Source:MGI Symbol;Acc:MGI:95614]
ENSMUST00000026519	12	14	28309	9.77188e-08	4833420G17Rik	RIKEN cDNA 4833420G17 gene Gene [Source:MGI Symbol;Acc:MGI:1914642]
ENSMUST00000115615	12	15	28309	3.24631e-07	Rbm3	RNA binding motif protein 3 Gene [Source:MGI Symbol;Acc:MGI:1099460]
ENSMUST00000099356	12	15	28309	3.24631e-07	Arrdc3	arrestin domain containing 3 Gene [Source:MGI Symbol;Acc:MGI:2145242]
ENSMUST00000115621	12	15	28309	3.24631e-07	Rbm3	RNA binding motif protein 3 Gene [Source:MGI Symbol;Acc:MGI:1099460]
ENSMUST00000103146	13	18	28309	4.26588e-07	Rpl23	ribosomal protein L23 Gene [Source:MGI Symbol;Acc:MGI:1929455]
ENSMUST00000058437	14	21	28309	4.26588e-07	Rpl7	ribosomal protein L7 Gene [Source:MGI Symbol;Acc:MGI:98073]
ENSMUST00000056571	24	61	28309	6.20205e-07	Syne1	synaptic nuclear envelope 1 Gene [Source:MGI Symbol;Acc:MGI:1927152]
ENSMUST00000115620	12	16	28309	7.67649e-07	Rbm3	RNA binding motif protein 3 Gene [Source:MGI Symbol;Acc:MGI:1099460]
ENSMUST00000121422	12	16	28309	7.67649e-07	Gm15453	predicted gene 15453 Pseudogene [Source:MGI Symbol;Acc:MGI:3642874]
ENSMUST00000071901	12	16	28309	7.67649e-07	NA	NA
ENSMUST00000115619	11	14	28309	1.69655e-06	Rbm3	RNA binding motif protein 3 Gene [Source:MGI Symbol;Acc:MGI:1099460]
ENSMUST00000078981	14	23	28309	1.70914e-06	NA	NA
ENSMUST00000071590	14	24	28309	3.23393e-06	Rbbp6	retinoblastoma binding protein 6 Gene [Source:MGI Symbol;Acc:MGI:894835]
ENSMUST00000052135	14	24	28309	3.23393e-06	Rbbp6	retinoblastoma binding protein 6 Gene [Source:MGI Symbol;Acc:MGI:894835]
ENSMUST00000049093	10	12	28309	3.23393e-06	Txnip	thioredoxin interacting protein Gene [Source:MGI Symbol;Acc:MGI:1889549]
ENSMUST00000048915	11	15	28309	4.36237e-06	Rbm8a	RNA binding motif protein 8a Gene [Source:MGI Symbol;Acc:MGI:1913129]
ENSMUST00000122364	11	15	28309	4.36237e-06	Gm10156	predicted gene 10156 Pseudogene [Source:MGI Symbol;Acc:MGI:3642344]
ENSMUST00000111996	9	10	28309	4.40168e-06	Atp5g3	ATP synthase, H+ transporting, mitochondrial F0 complex, subunit C3 (subunit 9) Gene [Source:MGI Symbol;Acc:MGI:2442035]
ENSMUST00000074519	9	10	28309	4.40168e-06	Txnip	thioredoxin interacting protein Gene [Source:MGI Symbol;Acc:MGI:1889549]
ENSMUST00000101465	13	22	28309	7.84671e-06	Usp34	ubiquitin specific peptidase 34 Gene [Source:MGI Symbol;Acc:MGI:109473]
ENSMUST00000032194	10	13	28309	8.84737e-06	Bhlhe40	basic helix-loop-helix family, member e40 Gene [Source:MGI Symbol;Acc:MGI:1097714]
ENSMUST00000094693	10	13	28309	8.84737e-06	Srsf5	serine/arginine-rich splicing factor 5 Gene [Source:MGI Symbol;Acc:MGI:98287]
ENSMUST00000106220	16	35	28309	1.80121e-05	Macf1	microtubule-actin crosslinking factor 1 Gene [Source:MGI Symbol;Acc:MGI:108559]
ENSMUST00000109351	9	11	28309	1.80121e-05	NA	NA
ENSMUST00000110352	9	11	28309	1.80121e-05	Srsf5	serine/arginine-rich splicing factor 5 Gene [Source:MGI Symbol;Acc:MGI:98287]
ENSMUST00000070402	12	20	28309	1.90813e-05	Usp34	ubiquitin specific peptidase 34 Gene [Source:MGI Symbol;Acc:MGI:109473]
ENSMUST00000079735	14	28	28309	2.97372e-05	Rpl30	ribosomal protein L30 Gene [Source:MGI Symbol;Acc:MGI:98037]
ENSMUST00000034349	11	18	28309	5.33146e-05	Nae1	NEDD8 activating enzyme E1 subunit 1 Gene [Source:MGI Symbol;Acc:MGI:2384561]
ENSMUST00000040010	9	12	28309	5.86499e-05	Rbm3	RNA binding motif protein 3 Gene [Source:MGI Symbol;Acc:MGI:1099460]
ENSMUST00000115616	10	15	28309	6.09621e-05	Rbm3	RNA binding motif protein 3 Gene [Source:MGI Symbol;Acc:MGI:1099460]
ENSMUST00000021084	12	22	28309	7.10469e-05	Sumo2	SMT3 suppressor of mif two 3 homolog 2 (yeast) Gene [Source:MGI Symbol;Acc:MGI:2158813]
ENSMUST00000102536	13	26	28309	7.90738e-05	Rpl11	ribosomal protein L11 Gene [Source:MGI Symbol;Acc:MGI:1914275]
ENSMUST00000016703	8	10	28309	0.000122845	H3f3b	H3 histone, family 3B Gene [Source:MGI Symbol;Acc:MGI:1101768]
ENSMUST00000048642	8	10	28309	0.000122845	Parl	presenilin associated, rhomboid-like Gene [Source:MGI Symbol;Acc:MGI:1277152]
ENSMUST00000110583	12	23	28309	0.000122845	Ccdc82	coiled-coil domain containing 82 Gene [Source:MGI Symbol;Acc:MGI:1913646]
ENSMUST00000110351	9	13	28309	0.000142835	Srsf5	serine/arginine-rich splicing factor 5 Gene [Source:MGI Symbol;Acc:MGI:98287]
ENSMUST00000029433	9	13	28309	0.000142835	Ptpn22	protein tyrosine phosphatase, non-receptor type 22 (lymphoid) Gene [Source:MGI Symbol;Acc:MGI:107170]
ENSMUST00000119876	11	20	28309	0.000179057	Rps25-ps1	ribosomal protein S25, pseudogene 1 Pseudogene [Source:MGI Symbol;Acc:MGI:3642902]
ENSMUST00000050143	11	20	28309	0.000179057	Gm7729	predicted gene 7729 Pseudogene [Source:MGI Symbol;Acc:MGI:3647361]
ENSMUST00000090771	7	8	28309	0.000222227	Txnip	thioredoxin interacting protein Gene [Source:MGI Symbol;Acc:MGI:1889549]
ENSMUST00000122204	14	33	28309	0.000272992	Gm7879	predicted pseudogene 7879 Pseudogene [Source:MGI Symbol;Acc:MGI:3645078]
ENSMUST00000021562	6	6	28309	0.000309608	Srsf5	serine/arginine-rich splicing factor 5 Gene [Source:MGI Symbol;Acc:MGI:98287]
ENSMUST00000033008	11	21	28309	0.000316397	Psma1	proteasome (prosome, macropain) subunit, alpha type 1 Gene [Source:MGI Symbol;Acc:MGI:1347005]
ENSMUST00000056458	15	39	28309	0.00046464	Ppih	peptidyl prolyl isomerase H Gene [Source:MGI Symbol;Acc:MGI:106499]
ENSMUST00000106540	10	18	28309	0.000475363	Amy1	amylase 1, salivary Gene [Source:MGI Symbol;Acc:MGI:88019]
ENSMUST00000015877	10	18	28309	0.000475363	Capza2	capping protein (actin filament) muscle Z-line, alpha 2 Gene [Source:MGI Symbol;Acc:MGI:106222]
ENSMUST00000118048	9	15	28309	0.000683562	Gm11518	predicted gene 11518 Pseudogene [Source:MGI Symbol;Acc:MGI:3650306]
ENSMUST00000033805	8	12	28309	0.00072859	Psmd10	proteasome (prosome, macropain) 26S subunit, non-ATPase, 10 Gene [Source:MGI Symbol;Acc:MGI:1858898]
ENSMUST00000109193	8	12	28309	0.00072859	Dpm1	dolichol-phosphate (beta-D) mannosyltransferase 1 Gene [Source:MGI Symbol;Acc:MGI:1330239]
ENSMUST00000046651	7	9	28309	0.00072859	AI314976	expressed sequence AI314976 Gene [Source:MGI Symbol;Acc:MGI:2146818]
ENSMUST00000106525	7	9	28309	0.00072859	4732418C07Rik	RIKEN cDNA 4732418C07 gene Gene [Source:MGI Symbol;Acc:MGI:2442397]
ENSMUST00000106957	8	12	28309	0.00072859	Myl4	myosin, light polypeptide 4 Gene [Source:MGI Symbol;Acc:MGI:97267]
ENSMUST00000079213	8	12	28309	0.00072859	Prpf38a	PRP38 pre-mRNA processing factor 38 (yeast) domain containing A Gene [Source:MGI Symbol;Acc:MGI:1916962]
ENSMUST00000098156	7	9	28309	0.00072859	NA	NA
ENSMUST00000031637	8	12	28309	0.00072859	Ndufa4	NADH dehydrogenase (ubiquinone) 1 alpha subcomplex, 4 Gene [Source:MGI Symbol;Acc:MGI:107686]
ENSMUST00000031775	8	12	28309	0.00072859	Cald1	caldesmon 1 Gene [Source:MGI Symbol;Acc:MGI:88250]
ENSMUST00000025327	7	9	28309	0.00072859	NA	NA
ENSMUST00000014457	11	23	28309	0.000768768	Cox6c	cytochrome c oxidase, subunit VIc Gene [Source:MGI Symbol;Acc:MGI:104614]
ENSMUST00000086880	11	23	28309	0.000768768	Armcx3	armadillo repeat containing, X-linked 3 Gene [Source:MGI Symbol;Acc:MGI:1918953]
ENSMUST00000106317	12	28	28309	0.00110615	Ppih	peptidyl prolyl isomerase H Gene [Source:MGI Symbol;Acc:MGI:106499]
ENSMUST00000115026	9	16	28309	0.00113668	Cald1	caldesmon 1 Gene [Source:MGI Symbol;Acc:MGI:88250]
ENSMUST00000079733	10	20	28309	0.00123796	Gm10036	predicted gene 10036 Gene [Source:MGI Symbol;Acc:MGI:3642334]
ENSMUST00000033683	11	24	28309	0.00123796	Rps4x	ribosomal protein S4, X-linked Gene [Source:MGI Symbol;Acc:MGI:98158]
ENSMUST00000029722	10	20	28309	0.00123796	Rps3a	ribosomal protein S3A Gene [Source:MGI Symbol;Acc:MGI:1202063]
ENSMUST00000050993	10	20	28309	0.00123796	Eif5	eukaryotic translation initiation factor 5 Gene [Source:MGI Symbol;Acc:MGI:95309]
ENSMUST00000029911	6	7	28309	0.00131172	Sfrs18	serine/arginine-rich splicing factor 18 Gene [Source:MGI Symbol;Acc:MGI:1913875]
ENSMUST00000113453	6	7	28309	0.00131172	Hopx	HOP homeobox Gene [Source:MGI Symbol;Acc:MGI:1916782]
ENSMUST00000106318	14	38	28309	0.00131172	Ppih	peptidyl prolyl isomerase H Gene [Source:MGI Symbol;Acc:MGI:106499]
ENSMUST00000023405	8	13	28309	0.00138977	Arl6	ADP-ribosylation factor-like 6 Gene [Source:MGI Symbol;Acc:MGI:1927136]
ENSMUST00000090417	8	13	28309	0.00138977	F3	coagulation factor III Gene [Source:MGI Symbol;Acc:MGI:88381]
ENSMUST00000098351	8	13	28309	0.00138977	NA	NA
ENSMUST00000119853	8	13	28309	0.00138977	Gm12174	predicted gene 12174 Pseudogene [Source:MGI Symbol;Acc:MGI:3651722]
ENSMUST00000039729	8	13	28309	0.00138977	Lyrm5	LYR motif containing 5 Gene [Source:MGI Symbol;Acc:MGI:1914886]
ENSMUST00000072372	7	10	28309	0.00161063	NA	NA
ENSMUST00000069511	7	10	28309	0.00161063	Abcd2	ATP-binding cassette, sub-family D (ALD), member 2 Gene [Source:MGI Symbol;Acc:MGI:1349467]
ENSMUST00000120901	13	34	28309	0.0016108	Gm11585	predicted gene 11585 Pseudogene [Source:MGI Symbol;Acc:MGI:3651395]
ENSMUST00000106157	11	25	28309	0.00166656	Zranb1	zinc finger, RAN-binding domain containing 1 Gene [Source:MGI Symbol;Acc:MGI:106441]
ENSMUST00000077856	9	17	28309	0.00169086	Rpl27	ribosomal protein L27 Gene [Source:MGI Symbol;Acc:MGI:98036]
ENSMUST00000021119	9	17	28309	0.00169086	Aspa	aspartoacylase Gene [Source:MGI Symbol;Acc:MGI:87914]
ENSMUST00000040506	9	17	28309	0.00169086	Fam13b	family with sequence similarity 13, member B Gene [Source:MGI Symbol;Acc:MGI:2447834]
ENSMUST00000040440	9	17	28309	0.00169086	Calm2	calmodulin 2 Gene [Source:MGI Symbol;Acc:MGI:103250]
ENSMUST00000058496	9	17	28309	0.00169086	Taok1	TAO kinase 1 Gene [Source:MGI Symbol;Acc:MGI:1914490]
ENSMUST00000024887	10	21	28309	0.0017309	2410091C18Rik	RIKEN cDNA 2410091C18 gene Gene [Source:MGI Symbol;Acc:MGI:1920944]
ENSMUST00000070776	5	5	28309	0.00175889	NA	NA
ENSMUST00000118692	5	5	28309	0.00175889	Gm12090	predicted gene 12090 Pseudogene [Source:MGI Symbol;Acc:MGI:3650090]
ENSMUST00000105036	8	14	28309	0.00233268	Gm12854	predicted gene 12854 Pseudogene [Source:MGI Symbol;Acc:MGI:3650410]
ENSMUST00000090049	8	14	28309	0.00233268	Gm10241	predicted pseudogene 10241 Pseudogene [Source:MGI Symbol;Acc:MGI:3704461]
ENSMUST00000098005	8	14	28309	0.00233268	Ptprd	protein tyrosine phosphatase, receptor type, D Gene [Source:MGI Symbol;Acc:MGI:97812]
ENSMUST00000117664	8	14	28309	0.00233268	Gm10241	predicted pseudogene 10241 Pseudogene [Source:MGI Symbol;Acc:MGI:3704461]
ENSMUST00000084861	8	14	28309	0.00233268	Gm13237	predicted gene 13237 Pseudogene [Source:MGI Symbol;Acc:MGI:3649924]
ENSMUST00000072540	8	14	28309	0.00233268	Ptprd	protein tyrosine phosphatase, receptor type, D Gene [Source:MGI Symbol;Acc:MGI:97812]
ENSMUST00000115777	8	14	28309	0.00233268	Ube2v2	ubiquitin-conjugating enzyme E2 variant 2 Gene [Source:MGI Symbol;Acc:MGI:1917870]
ENSMUST00000116304	8	14	28309	0.00233268	Ctss	cathepsin S Gene [Source:MGI Symbol;Acc:MGI:107341]
ENSMUST00000033431	8	14	28309	0.00233268	Slc25a14	solute carrier family 25 (mitochondrial carrier, brain), member 14 Gene [Source:MGI Symbol;Acc:MGI:1330823]
ENSMUST00000051014	8	14	28309	0.00233268	Exph5	exophilin 5 Gene [Source:MGI Symbol;Acc:MGI:2443248]
ENSMUST00000082108	12	31	28309	0.0025518	Macf1	microtubule-actin crosslinking factor 1 Gene [Source:MGI Symbol;Acc:MGI:108559]
ENSMUST00000029771	7	11	28309	0.00301944	F3	coagulation factor III Gene [Source:MGI Symbol;Acc:MGI:88381]
ENSMUST00000099646	7	11	28309	0.00301944	Arl6	ADP-ribosylation factor-like 6 Gene [Source:MGI Symbol;Acc:MGI:1927136]
ENSMUST00000070878	6	8	28309	0.00301944	Fkbp2	FK506 binding protein 2 Gene [Source:MGI Symbol;Acc:MGI:95542]
ENSMUST00000108229	6	8	28309	0.00301944	Sfrs18	serine/arginine-rich splicing factor 18 Gene [Source:MGI Symbol;Acc:MGI:1913875]
ENSMUST00000115021	7	11	28309	0.00301944	Cald1	caldesmon 1 Gene [Source:MGI Symbol;Acc:MGI:88250]
ENSMUST00000020446	6	8	28309	0.00301944	Tmbim4	transmembrane BAX inhibitor motif containing 4 Gene [Source:MGI Symbol;Acc:MGI:1915462]
ENSMUST00000040914	7	11	28309	0.00301944	Hist1h1c	histone cluster 1, H1c Gene [Source:MGI Symbol;Acc:MGI:1931526]
ENSMUST00000065865	6	8	28309	0.00301944	Thoc7	THO complex 7 homolog (Drosophila) Gene [Source:MGI Symbol;Acc:MGI:1913481]
ENSMUST00000036418	6	8	28309	0.00301944	Gm129	predicted gene 129 Gene [Source:MGI Symbol;Acc:MGI:2684975]
ENSMUST00000100768	6	8	28309	0.00301944	Dennd5b	DENN/MADD domain containing 5B Gene [Source:MGI Symbol;Acc:MGI:2444273]
ENSMUST00000018914	7	11	28309	0.00301944	Atp5g3	ATP synthase, H+ transporting, mitochondrial F0 complex, subunit C3 (subunit 9) Gene [Source:MGI Symbol;Acc:MGI:2442035]
ENSMUST00000076817	11	27	28309	0.00301944	Utrn	utrophin Gene [Source:MGI Symbol;Acc:MGI:104631]
ENSMUST00000003635	7	11	28309	0.00301944	Ier3	immediate early response 3 Gene [Source:MGI Symbol;Acc:MGI:104814]
ENSMUST00000112316	7	11	28309	0.00301944	Txlng	taxilin gamma Gene [Source:MGI Symbol;Acc:MGI:3590652]
ENSMUST00000106524	6	8	28309	0.00301944	4732418C07Rik	RIKEN cDNA 4732418C07 gene Gene [Source:MGI Symbol;Acc:MGI:2442397]
ENSMUST00000118024	6	8	28309	0.00301944	Gm12966	predicted gene 12966 Pseudogene [Source:MGI Symbol;Acc:MGI:3652043]
ENSMUST00000060084	19	70	28309	0.00308315	Dnajc13	DnaJ (Hsp40) homolog, subfamily C, member 13 Gene [Source:MGI Symbol;Acc:MGI:2676368]
ENSMUST00000097897	12	32	28309	0.00317837	Macf1	microtubule-actin crosslinking factor 1 Gene [Source:MGI Symbol;Acc:MGI:108559]
ENSMUST00000027997	10	23	28309	0.00344384	Rgs5	regulator of G-protein signaling 5 Gene [Source:MGI Symbol;Acc:MGI:1098434]
ENSMUST00000054544	10	23	28309	0.00344384	Rpl36al	ribosomal protein L36A-like Gene [Source:MGI Symbol;Acc:MGI:1913733]
ENSMUST00000113552	8	15	28309	0.00365368	Fnbp1	formin binding protein 1 Gene [Source:MGI Symbol;Acc:MGI:109606]
ENSMUST00000109293	8	15	28309	0.00365368	Ipo11	importin 11 Gene [Source:MGI Symbol;Acc:MGI:2442377]
ENSMUST00000090413	8	15	28309	0.00365368	Utp3	UTP3, small subunit (SSU) processome component, homolog (S. cerevisiae) Gene [Source:MGI Symbol;Acc:MGI:1919230]
ENSMUST00000118236	8	15	28309	0.00365368	Ube2v2	ubiquitin-conjugating enzyme E2 variant 2 Gene [Source:MGI Symbol;Acc:MGI:1917870]
ENSMUST00000018800	8	15	28309	0.00365368	Myl4	myosin, light polypeptide 4 Gene [Source:MGI Symbol;Acc:MGI:97267]
ENSMUST00000040649	9	19	28309	0.00369356	Gm10052	predicted pseudogene 10052 Pseudogene [Source:MGI Symbol;Acc:MGI:3704348]
ENSMUST00000048263	9	19	28309	0.00369356	Wapal	wings apart-like homolog (Drosophila) Gene [Source:MGI Symbol;Acc:MGI:2675859]
ENSMUST00000109278	7	12	28309	0.00525143	Ttc1	tetratricopeptide repeat domain 1 Gene [Source:MGI Symbol;Acc:MGI:1914077]
ENSMUST00000117644	7	12	28309	0.00525143	Cryzl1	crystallin, zeta (quinone reductase)-like 1 Gene [Source:MGI Symbol;Acc:MGI:1913859]
ENSMUST00000089473	7	12	28309	0.00525143	Zdhhc20	zinc finger, DHHC domain containing 20 Gene [Source:MGI Symbol;Acc:MGI:1923215]
ENSMUST00000102847	7	12	28309	0.00525143	NA	NA
ENSMUST00000088533	7	12	28309	0.00525143	NA	NA
ENSMUST00000119738	7	12	28309	0.00525143	Gm12335	predicted gene 12335 Pseudogene [Source:MGI Symbol;Acc:MGI:3650727]
ENSMUST00000084568	7	12	28309	0.00525143	Gm12335	predicted gene 12335 Pseudogene [Source:MGI Symbol;Acc:MGI:3650727]
ENSMUST00000121569	7	12	28309	0.00525143	Smt3h2-ps4	SMT3 suppressor of mif two 3 homolog 2, pseudogene 4 (S. cerevisiae) Pseudogene [Source:MGI Symbol;Acc:MGI:2149598]
ENSMUST00000073279	7	12	28309	0.00525143	Rcor3	REST corepressor 3 Gene [Source:MGI Symbol;Acc:MGI:2441920]
ENSMUST00000044220	7	12	28309	0.00525143	Cmc1	COX assembly mitochondrial protein homolog (S. cerevisiae) Gene [Source:MGI Symbol;Acc:MGI:1915149]
ENSMUST00000084614	9	20	28309	0.00559508	Gm10288	predicted gene 10288 Gene [Source:MGI Symbol;Acc:MGI:3704227]
ENSMUST00000078034	9	20	28309	0.00559508	Rpl9-ps6	ribosomal protein L9, pseudogene 6 Pseudogene [Source:MGI Symbol;Acc:MGI:3642682]
ENSMUST00000033265	9	20	28309	0.00559508	Zranb1	zinc finger, RAN-binding domain containing 1 Gene [Source:MGI Symbol;Acc:MGI:106441]
ENSMUST00000075277	8	16	28309	0.00568243	NA	NA
ENSMUST00000080166	8	16	28309	0.00568243	Gm10059	predicted pseudogene 10059 Pseudogene [Source:MGI Symbol;Acc:MGI:3642158]
ENSMUST00000099968	8	16	28309	0.00568243	Gm13690	predicted gene 13690 Pseudogene [Source:MGI Symbol;Acc:MGI:3652065]
ENSMUST00000105975	8	16	28309	0.00568243	Epb4.1	erythrocyte protein band 4.1 Gene [Source:MGI Symbol;Acc:MGI:95401]
ENSMUST00000113624	8	16	28309	0.00568243	Rora	RAR-related orphan receptor alpha Gene [Source:MGI Symbol;Acc:MGI:104661]
ENSMUST00000039900	8	16	28309	0.00568243	Prorsd1	prolyl-tRNA synthetase domain containing 1 Gene [Source:MGI Symbol;Acc:MGI:1915189]
ENSMUST00000118441	8	16	28309	0.00568243	Gm13160	predicted gene 13160 Pseudogene [Source:MGI Symbol;Acc:MGI:3649984]
ENSMUST00000118750	8	16	28309	0.00568243	Gm4459	predicted gene 4459 Pseudogene [Source:MGI Symbol;Acc:MGI:3782643]
ENSMUST00000111975	5	6	28309	0.00577453	Taok3	TAO kinase 3 Gene [Source:MGI Symbol;Acc:MGI:3041177]
ENSMUST00000095437	5	6	28309	0.00577453	NA	NA
ENSMUST00000075072	5	6	28309	0.00577453	Gpr65	G-protein coupled receptor 65 Gene [Source:MGI Symbol;Acc:MGI:108031]
ENSMUST00000104923	5	6	28309	0.00577453	NA	NA
ENSMUST00000029502	6	9	28309	0.00619774	Slc16a4	solute carrier family 16 (monocarboxylic acid transporters), member 4 Gene [Source:MGI Symbol;Acc:MGI:2385183]
ENSMUST00000045372	6	9	28309	0.00619774	Bpgm	2,3-bisphosphoglycerate mutase Gene [Source:MGI Symbol;Acc:MGI:1098242]
ENSMUST00000084759	6	9	28309	0.00619774	Gm10156	predicted gene 10156 Pseudogene [Source:MGI Symbol;Acc:MGI:3642344]
ENSMUST00000077462	6	9	28309	0.00619774	1810035L17Rik	RIKEN cDNA 1810035L17 gene Gene [Source:MGI Symbol;Acc:MGI:1916394]
ENSMUST00000030284	6	9	28309	0.00619774	Rnf11	ring finger protein 11 Gene [Source:MGI Symbol;Acc:MGI:1352759]
ENSMUST00000037023	10	25	28309	0.00630388	Rps29	ribosomal protein S29 Gene [Source:MGI Symbol;Acc:MGI:107681]
ENSMUST00000098601	12	35	28309	0.00671271	Vps13c	vacuolar protein sorting 13C (yeast) Gene [Source:MGI Symbol;Acc:MGI:2444207]
ENSMUST00000074680	8	17	28309	0.00828963	Gm9000	predicted gene 9000 Gene [Source:MGI Symbol;Acc:MGI:3643406]
ENSMUST00000119052	7	13	28309	0.00828963	Gm11196	predicted gene 11196 Pseudogene [Source:MGI Symbol;Acc:MGI:3649463]
ENSMUST00000121816	8	17	28309	0.00828963	Gm13232	predicted gene 13232 Pseudogene [Source:MGI Symbol;Acc:MGI:3649252]
ENSMUST00000077879	12	36	28309	0.00828963	Vps13c	vacuolar protein sorting 13C (yeast) Gene [Source:MGI Symbol;Acc:MGI:2444207]
ENSMUST00000115776	8	17	28309	0.00828963	Ube2v2	ubiquitin-conjugating enzyme E2 variant 2 Gene [Source:MGI Symbol;Acc:MGI:1917870]
ENSMUST00000104883	7	13	28309	0.00828963	NA	NA
ENSMUST00000021062	7	13	28309	0.00828963	Ddx5	DEAD (Asp-Glu-Ala-Asp) box polypeptide 5 Gene [Source:MGI Symbol;Acc:MGI:105037]
ENSMUST00000021471	7	13	28309	0.00828963	Tmx1	thioredoxin-related transmembrane protein 1 Gene [Source:MGI Symbol;Acc:MGI:1919986]
ENSMUST00000076587	8	17	28309	0.00828963	Ptp4a1	protein tyrosine phosphatase 4a1 Gene [Source:MGI Symbol;Acc:MGI:1277096]
ENSMUST00000030117	7	13	28309	0.00828963	Smu1	smu-1 suppressor of mec-8 and unc-52 homolog (C. elegans) Gene [Source:MGI Symbol;Acc:MGI:1915546]
ENSMUST00000107211	8	17	28309	0.00828963	Sytl2	synaptotagmin-like 2 Gene [Source:MGI Symbol;Acc:MGI:1933366]
ENSMUST00000119683	7	13	28309	0.00828963	Gm6341	predicted pseudogene 6341 Pseudogene [Source:MGI Symbol;Acc:MGI:3643600]
ENSMUST00000122151	8	17	28309	0.00828963	Gm13237	predicted gene 13237 Pseudogene [Source:MGI Symbol;Acc:MGI:3649924]
ENSMUST00000018547	7	13	28309	0.00828963	Ggnbp2	gametogenetin binding protein 2 Gene [Source:MGI Symbol;Acc:MGI:2387356]
ENSMUST00000054148	7	13	28309	0.00828963	Gm9790	predicted gene 9790 Gene [Source:MGI Symbol;Acc:MGI:3704221]
ENSMUST00000106214	12	36	28309	0.00828963	NA	NA
ENSMUST00000122038	7	13	28309	0.00828963	Wdr12	WD repeat domain 12 Gene [Source:MGI Symbol;Acc:MGI:1927241]
ENSMUST00000029515	8	17	28309	0.00828963	S100a11	S100 calcium binding protein A11 (calgizzarin) Gene [Source:MGI Symbol;Acc:MGI:1338798]
ENSMUST00000076160	10	26	28309	0.00829944	Tmed2	transmembrane emp24 domain trafficking protein 2 Gene [Source:MGI Symbol;Acc:MGI:1929269]
ENSMUST00000024879	10	26	28309	0.00829944	Birc6	baculoviral IAP repeat-containing 6 Gene [Source:MGI Symbol;Acc:MGI:1276108]
ENSMUST00000099403	4	4	28309	0.0093295	Fastkd3	FAST kinase domains 3 Gene [Source:MGI Symbol;Acc:MGI:1916827]
ENSMUST00000122291	4	4	28309	0.0093295	Gm14813	predicted gene 14813 Pseudogene [Source:MGI Symbol;Acc:MGI:3705714]
ENSMUST00000071134	4	4	28309	0.0093295	Tubb3	tubulin, beta 3 Gene [Source:MGI Symbol;Acc:MGI:107813]
ENSMUST00000080545	9	22	28309	0.0106458	Rpl9-ps4	ribosomal protein L9, pseudogene 4 Pseudogene [Source:MGI Symbol;Acc:MGI:3704410]
ENSMUST00000079775	9	22	28309	0.0106458	NA	NA
ENSMUST00000022286	6	10	28309	0.0114623	Ndufs4	NADH dehydrogenase (ubiquinone) Fe-S protein 4 Gene [Source:MGI Symbol;Acc:MGI:1343135]
ENSMUST00000046977	6	10	28309	0.0114623	Eltd1	EGF, latrophilin seven transmembrane domain containing 1 Gene [Source:MGI Symbol;Acc:MGI:2655562]
ENSMUST00000048770	6	10	28309	0.0114623	Sh3bgr	SH3-binding domain glutamic acid-rich protein Gene [Source:MGI Symbol;Acc:MGI:1354740]
ENSMUST00000074481	6	10	28309	0.0114623	NA	NA
ENSMUST00000006579	6	10	28309	0.0114623	Pfdn2	prefoldin 2 Gene [Source:MGI Symbol;Acc:MGI:1276111]
ENSMUST00000114936	6	10	28309	0.0114623	Slc25a14	solute carrier family 25 (mitochondrial carrier, brain), member 14 Gene [Source:MGI Symbol;Acc:MGI:1330823]
ENSMUST00000112636	6	10	28309	0.0114623	Galnt13	UDP-N-acetyl-alpha-D-galactosamine:polypeptide N-acetylgalactosaminyltransferase 13 Gene [Source:MGI Symbol;Acc:MGI:2139447]
ENSMUST00000114937	6	10	28309	0.0114623	Usp6nl	USP6 N-terminal like Gene [Source:MGI Symbol;Acc:MGI:2138893]
ENSMUST00000110329	6	10	28309	0.0114623	Azin1	antizyme inhibitor 1 Gene [Source:MGI Symbol;Acc:MGI:1859169]
ENSMUST00000121366	6	10	28309	0.0114623	Gm13430	predicted gene 13430 Pseudogene [Source:MGI Symbol;Acc:MGI:3651032]
ENSMUST00000118558	6	10	28309	0.0114623	Ndufa5	NADH dehydrogenase (ubiquinone) 1 alpha subcomplex, 5 Gene [Source:MGI Symbol;Acc:MGI:1915452]
ENSMUST00000100687	6	10	28309	0.0114623	Gm16439	predicted pseudogene 16439 Pseudogene [Source:MGI Symbol;Acc:MGI:3647611]
ENSMUST00000073108	8	18	28309	0.0120983	Gm6851	predicted pseudogene 6851 Pseudogene [Source:MGI Symbol;Acc:MGI:3643618]
ENSMUST00000041448	8	18	28309	0.0120983	Prorsd1	prolyl-tRNA synthetase domain containing 1 Gene [Source:MGI Symbol;Acc:MGI:1915189]
ENSMUST00000100297	8	18	28309	0.0120983	Ccdc46	coiled-coil domain containing 46 Gene [Source:MGI Symbol;Acc:MGI:1923673]
ENSMUST00000037341	8	18	28309	0.0120983	Nhsl1	NHS-like 1 Gene [Source:MGI Symbol;Acc:MGI:106390]
ENSMUST00000089441	7	14	28309	0.0128024	Gm7079	predicted pseudogene 7079 Pseudogene [Source:MGI Symbol;Acc:MGI:3643105]
ENSMUST00000021205	7	14	28309	0.0128024	Glod4	glyoxalase domain containing 4 Gene [Source:MGI Symbol;Acc:MGI:1914451]
ENSMUST00000082024	7	14	28309	0.0128024	Mpp5	membrane protein, palmitoylated 5 (MAGUK p55 subfamily member 5) Gene [Source:MGI Symbol;Acc:MGI:1927339]
ENSMUST00000088495	7	14	28309	0.0128024	Rpl7-ps7	ribosomal protein L7, pseudogene 7 Pseudogene [Source:MGI Symbol;Acc:MGI:3644615]
ENSMUST00000109852	7	14	28309	0.0128024	Inpp4b	inositol polyphosphate-4-phosphatase, type II Gene [Source:MGI Symbol;Acc:MGI:2158925]
ENSMUST00000087321	7	14	28309	0.0128024	Ppp1r3c	protein phosphatase 1, regulatory (inhibitor) subunit 3C Gene [Source:MGI Symbol;Acc:MGI:1858229]
ENSMUST00000115231	7	14	28309	0.0128024	Rpl39	ribosomal protein L39 Gene [Source:MGI Symbol;Acc:MGI:1914498]
ENSMUST00000112095	12	38	28309	0.0128025	Pbrm1	polybromo 1 Gene [Source:MGI Symbol;Acc:MGI:1923998]
ENSMUST00000026565	5	7	28309	0.0128952	Ifitm3	interferon induced transmembrane protein 3 Gene [Source:MGI Symbol;Acc:MGI:1913391]
ENSMUST00000032998	5	7	28309	0.0128952	Rps3	ribosomal protein S3 Gene [Source:MGI Symbol;Acc:MGI:1350917]
ENSMUST00000118662	5	7	28309	0.0128952	Gm15616	predicted gene 15616 Pseudogene [Source:MGI Symbol;Acc:MGI:3783061]
ENSMUST00000022169	5	7	28309	0.0128952	Hexb	hexosaminidase B Gene [Source:MGI Symbol;Acc:MGI:96074]
ENSMUST00000053265	5	7	28309	0.0128952	Lyrm4	LYR motif containing 4 Gene [Source:MGI Symbol;Acc:MGI:2683538]
ENSMUST00000079864	5	7	28309	0.0128952	NA	NA
ENSMUST00000101340	5	7	28309	0.0128952	Pttg1	pituitary tumor-transforming gene 1 Gene [Source:MGI Symbol;Acc:MGI:1353578]
ENSMUST00000067309	5	7	28309	0.0128952	NA	NA
ENSMUST00000099074	5	7	28309	0.0128952	NA	NA
ENSMUST00000118368	5	7	28309	0.0128952	Pttg1	pituitary tumor-transforming gene 1 Gene [Source:MGI Symbol;Acc:MGI:1353578]
ENSMUST00000100665	5	7	28309	0.0128952	NA	NA
ENSMUST00000121638	5	7	28309	0.0128952	Pttg1	pituitary tumor-transforming gene 1 Gene [Source:MGI Symbol;Acc:MGI:1353578]
ENSMUST00000058376	5	7	28309	0.0128952	1600021P15Rik	RIKEN cDNA 1600021P15 gene Gene [Source:MGI Symbol;Acc:MGI:1917028]
ENSMUST00000099945	10	28	28309	0.0139161	Amd1	S-adenosylmethionine decarboxylase 1 Gene [Source:MGI Symbol;Acc:MGI:88004]
ENSMUST00000097941	8	19	28309	0.0169996	Nf1	neurofibromatosis 1 Gene [Source:MGI Symbol;Acc:MGI:97306]
ENSMUST00000113563	8	19	28309	0.0169996	NA	NA
ENSMUST00000027054	8	19	28309	0.0169996	Gm5045	predicted gene 5045 Gene [Source:MGI Symbol;Acc:MGI:3647181]
ENSMUST00000035519	8	19	28309	0.0169996	Otud7b	OTU domain containing 7B Gene [Source:MGI Symbol;Acc:MGI:2654703]
ENSMUST00000042471	7	15	28309	0.0177461	Dis3	DIS3 mitotic control homolog (S. cerevisiae) Gene [Source:MGI Symbol;Acc:MGI:1919912]
ENSMUST00000020203	7	15	28309	0.0177461	Snrpf	small nuclear ribonucleoprotein polypeptide F Gene [Source:MGI Symbol;Acc:MGI:1917128]
ENSMUST00000102869	6	11	28309	0.0177461	Xpo1	exportin 1, CRM1 homolog (yeast) Gene [Source:MGI Symbol;Acc:MGI:2144013]
ENSMUST00000088898	7	15	28309	0.0177461	Zfp280c	zinc finger protein 280C Gene [Source:MGI Symbol;Acc:MGI:2387585]
ENSMUST00000111122	6	11	28309	0.0177461	Pum2	pumilio 2 (Drosophila) Gene [Source:MGI Symbol;Acc:MGI:1931751]
ENSMUST00000109853	7	15	28309	0.0177461	Inpp4b	inositol polyphosphate-4-phosphatase, type II Gene [Source:MGI Symbol;Acc:MGI:2158925]
ENSMUST00000030013	7	15	28309	0.0177461	Xpa	xeroderma pigmentosum, complementation group A Gene [Source:MGI Symbol;Acc:MGI:99135]
ENSMUST00000023616	7	15	28309	0.0177461	Slc15a2	solute carrier family 15 (H+/peptide transporter), member 2 Gene [Source:MGI Symbol;Acc:MGI:1890457]
ENSMUST00000111724	6	11	28309	0.0177461	Lyrm5	LYR motif containing 5 Gene [Source:MGI Symbol;Acc:MGI:1914886]
ENSMUST00000073939	7	15	28309	0.0177461	Tek	endothelial-specific receptor tyrosine kinase Gene [Source:MGI Symbol;Acc:MGI:98664]
ENSMUST00000119329	6	11	28309	0.0177461	Srp19	signal recognition particle 19 Gene [Source:MGI Symbol;Acc:MGI:1913634]
ENSMUST00000095753	6	11	28309	0.0177461	Tia1	cytotoxic granule-associated RNA binding protein 1 Gene [Source:MGI Symbol;Acc:MGI:107914]
ENSMUST00000047753	6	11	28309	0.0177461	Abcb1a	ATP-binding cassette, sub-family B (MDR/TAP), member 1A Gene [Source:MGI Symbol;Acc:MGI:97570]
ENSMUST00000031072	6	11	28309	0.0177461	Anapc4	anaphase promoting complex subunit 4 Gene [Source:MGI Symbol;Acc:MGI:1098673]
ENSMUST00000114160	7	15	28309	0.0177461	Fam50a	family with sequence similarity 50, member A Gene [Source:MGI Symbol;Acc:MGI:1351626]
ENSMUST00000090027	6	11	28309	0.0177461	Wapal	wings apart-like homolog (Drosophila) Gene [Source:MGI Symbol;Acc:MGI:2675859]
ENSMUST00000033478	6	11	28309	0.0177461	Mcf2	mcf.2 transforming sequence Gene [Source:MGI Symbol;Acc:MGI:96932]
ENSMUST00000081115	7	15	28309	0.0177461	NA	NA
ENSMUST00000110835	6	11	28309	0.0177461	Elf1	E74-like factor 1 Gene [Source:MGI Symbol;Acc:MGI:107180]
ENSMUST00000033544	6	11	28309	0.0177461	Brcc3	BRCA1/BRCA2-containing complex, subunit 3 Gene [Source:MGI Symbol;Acc:MGI:2389572]
ENSMUST00000016274	6	11	28309	0.0177461	N4bp2l2	NEDD4 binding protein 2-like 2 Gene [Source:MGI Symbol;Acc:MGI:2687207]
ENSMUST00000118989	7	15	28309	0.0177461	Gm13690	predicted gene 13690 Pseudogene [Source:MGI Symbol;Acc:MGI:3652065]
ENSMUST00000026175	6	11	28309	0.0177461	Fn3k	fructosamine 3 kinase Gene [Source:MGI Symbol;Acc:MGI:1926834]
ENSMUST00000111721	6	11	28309	0.0177461	Lyrm5	LYR motif containing 5 Gene [Source:MGI Symbol;Acc:MGI:1914886]
ENSMUST00000005860	6	11	28309	0.0177461	Pvalb	parvalbumin Gene [Source:MGI Symbol;Acc:MGI:97821]
ENSMUST00000076982	9	24	28309	0.0177461	Gm8719	predicted pseudogene 8719 Pseudogene [Source:MGI Symbol;Acc:MGI:3647551]
ENSMUST00000054917	7	15	28309	0.0177461	Epb4.1	erythrocyte protein band 4.1 Gene [Source:MGI Symbol;Acc:MGI:95401]
ENSMUST00000119740	6	11	28309	0.0177461	Gm12728	predicted gene 12728 Pseudogene [Source:MGI Symbol;Acc:MGI:3649486]
ENSMUST00000034214	6	11	28309	0.0177461	Mt2	metallothionein 2 Gene [Source:MGI Symbol;Acc:MGI:97172]
ENSMUST00000112999	6	11	28309	0.0177461	Myeov2	myeloma overexpressed 2 Gene [Source:MGI Symbol;Acc:MGI:1914165]
ENSMUST00000102870	6	11	28309	0.0177461	Xpo1	exportin 1, CRM1 homolog (yeast) Gene [Source:MGI Symbol;Acc:MGI:2144013]
ENSMUST00000079279	6	11	28309	0.0177461	Gm10118	predicted gene 10118 Gene [Source:MGI Symbol;Acc:MGI:3642340]
ENSMUST00000106321	11	35	28309	0.0206273	Ppih	peptidyl prolyl isomerase H Gene [Source:MGI Symbol;Acc:MGI:106499]
ENSMUST00000113627	8	20	28309	0.0224709	Pin4	protein (peptidyl-prolyl cis/trans isomerase) NIMA-interacting, 4 (parvulin) Gene [Source:MGI Symbol;Acc:MGI:1916963]
ENSMUST00000032891	8	20	28309	0.0224709	Smg1	SMG1 homolog, phosphatidylinositol 3-kinase-related kinase (C. elegans) Gene [Source:MGI Symbol;Acc:MGI:1919742]
ENSMUST00000108248	8	20	28309	0.0224709	Nf1	neurofibromatosis 1 Gene [Source:MGI Symbol;Acc:MGI:97306]
ENSMUST00000033935	5	8	28309	0.0253585	AI316807	expressed sequence AI316807 Gene [Source:MGI Symbol;Acc:MGI:2142501]
ENSMUST00000022471	11	36	28309	0.0253585	Pbrm1	polybromo 1 Gene [Source:MGI Symbol;Acc:MGI:1923998]
ENSMUST00000100855	5	8	28309	0.0253585	NA	NA
ENSMUST00000043767	5	8	28309	0.0253585	Upf3a	UPF3 regulator of nonsense transcripts homolog A (yeast) Gene [Source:MGI Symbol;Acc:MGI:1914281]
ENSMUST00000119047	5	8	28309	0.0253585	Tmem128	transmembrane protein 128 Gene [Source:MGI Symbol;Acc:MGI:1913559]
ENSMUST00000088365	5	8	28309	0.0253585	NA	NA
ENSMUST00000046644	5	8	28309	0.0253585	Tbca	tubulin cofactor A Gene [Source:MGI Symbol;Acc:MGI:107549]
ENSMUST00000034552	5	8	28309	0.0253585	Fdx1	ferredoxin 1 Gene [Source:MGI Symbol;Acc:MGI:103224]
ENSMUST00000014698	5	8	28309	0.0253585	Dguok	deoxyguanosine kinase Gene [Source:MGI Symbol;Acc:MGI:1351602]
ENSMUST00000097899	11	36	28309	0.0253585	Macf1	microtubule-actin crosslinking factor 1 Gene [Source:MGI Symbol;Acc:MGI:108559]
ENSMUST00000020687	5	8	28309	0.0253585	Pttg1	pituitary tumor-transforming gene 1 Gene [Source:MGI Symbol;Acc:MGI:1353578]
ENSMUST00000045174	5	8	28309	0.0253585	Ypel5	yippee-like 5 (Drosophila) Gene [Source:MGI Symbol;Acc:MGI:1916937]
ENSMUST00000081080	5	8	28309	0.0253585	NA	NA
ENSMUST00000034997	5	8	28309	0.0253585	2810026P18Rik	RIKEN cDNA 2810026P18 gene Gene [Source:MGI Symbol;Acc:MGI:1919905]
ENSMUST00000106750	5	8	28309	0.0253585	Psmd12	proteasome (prosome, macropain) 26S subunit, non-ATPase, 12 Gene [Source:MGI Symbol;Acc:MGI:1914247]
ENSMUST00000092175	5	8	28309	0.0253585	Kcnc2	potassium voltage gated channel, Shaw-related subfamily, member 2 Gene [Source:MGI Symbol;Acc:MGI:96668]
ENSMUST00000001672	7	16	28309	0.0258254	Ifrd1	interferon-related developmental regulator 1 Gene [Source:MGI Symbol;Acc:MGI:1316717]
ENSMUST00000029344	7	16	28309	0.0258254	Mfsd1	major facilitator superfamily domain containing 1 Gene [Source:MGI Symbol;Acc:MGI:1914118]
ENSMUST00000037633	7	16	28309	0.0258254	Zc3h7a	zinc finger CCCH type containing 7 A Gene [Source:MGI Symbol;Acc:MGI:2445044]
ENSMUST00000029414	7	16	28309	0.0258254	Ssr3	signal sequence receptor, gamma Gene [Source:MGI Symbol;Acc:MGI:1914687]
ENSMUST00000077440	7	16	28309	0.0258254	Nfat5	nuclear factor of activated T-cells 5 Gene [Source:MGI Symbol;Acc:MGI:1859333]
ENSMUST00000074622	7	16	28309	0.0258254	Fam5c	family with sequence similarity 5, member C Gene [Source:MGI Symbol;Acc:MGI:2443035]
ENSMUST00000102552	7	16	28309	0.0258254	Hmgn2	high mobility group nucleosomal binding domain 2 Gene [Source:MGI Symbol;Acc:MGI:96136]
ENSMUST00000035606	7	16	28309	0.0258254	Ascc3	activating signal cointegrator 1 complex subunit 3 Gene [Source:MGI Symbol;Acc:MGI:1925237]
ENSMUST00000090749	7	16	28309	0.0258254	Ppia	peptidylprolyl isomerase A Gene [Source:MGI Symbol;Acc:MGI:97749]
ENSMUST00000029303	7	16	28309	0.0258254	Naa15	N(alpha)-acetyltransferase 15, NatA auxiliary subunit Gene [Source:MGI Symbol;Acc:MGI:1922088]
ENSMUST00000095062	7	16	28309	0.0258254	Lmbrd1	LMBR1 domain containing 1 Gene [Source:MGI Symbol;Acc:MGI:1915671]
ENSMUST00000052615	7	16	28309	0.0258254	Gm9800	predicted gene 9800 Pseudogene [Source:MGI Symbol;Acc:MGI:3710580]
ENSMUST00000114925	4	5	28309	0.0263449	Unc50	unc-50 homolog (C. elegans) Gene [Source:MGI Symbol;Acc:MGI:1914637]
ENSMUST00000062045	4	5	28309	0.0263449	Hist1h1e	histone cluster 1, H1e Gene [Source:MGI Symbol;Acc:MGI:1931527]
ENSMUST00000103004	4	5	28309	0.0263449	Asph	aspartate-beta-hydroxylase Gene [Source:MGI Symbol;Acc:MGI:1914186]
ENSMUST00000085330	4	5	28309	0.0263449	Gm10491	predicted gene 10491 Gene [Source:MGI Symbol;Acc:MGI:3642000]
ENSMUST00000118147	4	5	28309	0.0263449	Gm15460	predicted gene 15460 Pseudogene [Source:MGI Symbol;Acc:MGI:3707338]
ENSMUST00000073314	4	5	28309	0.0263449	Pign	phosphatidylinositol glycan anchor biosynthesis, class N Gene [Source:MGI Symbol;Acc:MGI:1351629]
ENSMUST00000118438	4	5	28309	0.0263449	Arl6	ADP-ribosylation factor-like 6 Gene [Source:MGI Symbol;Acc:MGI:1927136]
ENSMUST00000075421	4	5	28309	0.0263449	Gm10100	predicted gene 10100 Gene [Source:MGI Symbol;Acc:MGI:3642388]
ENSMUST00000101077	4	5	28309	0.0263449	A530017D24Rik	RIKEN cDNA A530017D24 gene Gene [Source:MGI Symbol;Acc:MGI:2144320]
ENSMUST00000098072	4	5	28309	0.0263449	NA	NA
ENSMUST00000094291	6	12	28309	0.0263996	Rps29	ribosomal protein S29 Gene [Source:MGI Symbol;Acc:MGI:107681]
ENSMUST00000095218	10	31	28309	0.0263996	Rpl7a-ps5	ribosomal protein L7A, pseudogene 5 Pseudogene [Source:MGI Symbol;Acc:MGI:3643553]
ENSMUST00000106454	6	12	28309	0.0263996	H3f3b	H3 histone, family 3B Gene [Source:MGI Symbol;Acc:MGI:1101768]
ENSMUST00000093249	6	12	28309	0.0263996	Cdh8	cadherin 8 Gene [Source:MGI Symbol;Acc:MGI:107434]
ENSMUST00000121320	6	12	28309	0.0263996	Gm14303	predicted gene 14303 Pseudogene [Source:MGI Symbol;Acc:MGI:3651379]
ENSMUST00000030787	6	12	28309	0.0263996	Rheb	Ras homolog enriched in brain Gene [Source:MGI Symbol;Acc:MGI:97912]
ENSMUST00000021412	6	12	28309	0.0263996	Psma6	proteasome (prosome, macropain) subunit, alpha type 6 Gene [Source:MGI Symbol;Acc:MGI:1347006]
ENSMUST00000021993	10	31	28309	0.0263996	Uqcrb	ubiquinol-cytochrome c reductase binding protein Gene [Source:MGI Symbol;Acc:MGI:1914780]
ENSMUST00000107380	6	12	28309	0.0263996	NA	NA
ENSMUST00000105979	6	12	28309	0.0263996	Epb4.1	erythrocyte protein band 4.1 Gene [Source:MGI Symbol;Acc:MGI:95401]
ENSMUST00000087638	6	12	28309	0.0263996	Aldh1a1	aldehyde dehydrogenase family 1, subfamily A1 Gene [Source:MGI Symbol;Acc:MGI:1353450]
ENSMUST00000121487	6	12	28309	0.0263996	Gm11604	predicted gene 11604 Pseudogene [Source:MGI Symbol;Acc:MGI:3651795]
ENSMUST00000020885	6	12	28309	0.0263996	Sypl	synaptophysin-like protein Gene [Source:MGI Symbol;Acc:MGI:108081]
ENSMUST00000112868	6	12	28309	0.0263996	Pak3	p21 protein (Cdc42/Rac)-activated kinase 3 Gene [Source:MGI Symbol;Acc:MGI:1339656]
ENSMUST00000107366	6	12	28309	0.0263996	Trim32	tripartite motif-containing 32 Gene [Source:MGI Symbol;Acc:MGI:1917057]
ENSMUST00000056292	6	12	28309	0.0263996	Taf13	TAF13 RNA polymerase II, TATA box binding protein (TBP)-associated factor Gene [Source:MGI Symbol;Acc:MGI:1913500]
ENSMUST00000056136	6	12	28309	0.0263996	Kcnj10	potassium inwardly-rectifying channel, subfamily J, member 10 Gene [Source:MGI Symbol;Acc:MGI:1194504]
ENSMUST00000033018	6	12	28309	0.0263996	Far1	fatty acyl CoA reductase 1 Gene [Source:MGI Symbol;Acc:MGI:1914670]
ENSMUST00000106224	10	31	28309	0.0263996	Macf1	microtubule-actin crosslinking factor 1 Gene [Source:MGI Symbol;Acc:MGI:108559]
ENSMUST00000088183	8	21	28309	0.0271926	Gm5940	predicted gene 5940 Pseudogene [Source:MGI Symbol;Acc:MGI:3648847]
ENSMUST00000113562	8	21	28309	0.0271926	Fnbp1	formin binding protein 1 Gene [Source:MGI Symbol;Acc:MGI:109606]
ENSMUST00000009039	9	26	28309	0.0271926	Rpl30	ribosomal protein L30 Gene [Source:MGI Symbol;Acc:MGI:98037]
ENSMUST00000088615	10	32	28309	0.033275	Arfgef1	ADP-ribosylation factor guanine nucleotide-exchange factor 1(brefeldin A-inhibited) Gene [Source:MGI Symbol;Acc:MGI:2442988]
ENSMUST00000109413	7	17	28309	0.0350823	Cpeb4	cytoplasmic polyadenylation element binding protein 4 Gene [Source:MGI Symbol;Acc:MGI:1914829]
ENSMUST00000071325	7	17	28309	0.0350823	Nf1	neurofibromatosis 1 Gene [Source:MGI Symbol;Acc:MGI:97306]
ENSMUST00000100840	7	17	28309	0.0350823	NA	NA
ENSMUST00000121185	7	17	28309	0.0350823	Sumo2	SMT3 suppressor of mif two 3 homolog 2 (yeast) Gene [Source:MGI Symbol;Acc:MGI:2158813]
ENSMUST00000042529	7	17	28309	0.0350823	Inpp4b	inositol polyphosphate-4-phosphatase, type II Gene [Source:MGI Symbol;Acc:MGI:2158925]
ENSMUST00000041047	7	17	28309	0.0350823	Lnpep	leucyl/cystinyl aminopeptidase Gene [Source:MGI Symbol;Acc:MGI:2387123]
ENSMUST00000014339	7	17	28309	0.0350823	Dnajc7	DnaJ (Hsp40) homolog, subfamily C, member 7 Gene [Source:MGI Symbol;Acc:MGI:1928373]
ENSMUST00000102798	7	17	28309	0.0350823	Tek	endothelial-specific receptor tyrosine kinase Gene [Source:MGI Symbol;Acc:MGI:98664]
ENSMUST00000068282	7	17	28309	0.0350823	Atl2	atlastin GTPase 2 Gene [Source:MGI Symbol;Acc:MGI:1929492]
ENSMUST00000068042	7	17	28309	0.0350823	Dis3	DIS3 mitotic control homolog (S. cerevisiae) Gene [Source:MGI Symbol;Acc:MGI:1919912]
ENSMUST00000031668	7	17	28309	0.0350823	Col1a2	collagen, type I, alpha 2 Gene [Source:MGI Symbol;Acc:MGI:88468]
ENSMUST00000091394	9	27	28309	0.0358635	Abi1	abl-interactor 1 Gene [Source:MGI Symbol;Acc:MGI:104913]
ENSMUST00000097898	9	27	28309	0.0358635	Macf1	microtubule-actin crosslinking factor 1 Gene [Source:MGI Symbol;Acc:MGI:108559]
ENSMUST00000113564	8	22	28309	0.037353	Fnbp1	formin binding protein 1 Gene [Source:MGI Symbol;Acc:MGI:109606]
ENSMUST00000055195	8	22	28309	0.037353	Lmbr1	limb region 1 Gene [Source:MGI Symbol;Acc:MGI:1861746]
ENSMUST00000105365	5	9	28309	0.0380005	Cirbp	cold inducible RNA binding protein Gene [Source:MGI Symbol;Acc:MGI:893588]
ENSMUST00000029786	5	9	28309	0.0380005	Mrpl9	mitochondrial ribosomal protein L9 Gene [Source:MGI Symbol;Acc:MGI:2137211]
ENSMUST00000056396	6	13	28309	0.0380005	Gm6563	predicted pseudogene 6563 Pseudogene [Source:MGI Symbol;Acc:MGI:3646907]
ENSMUST00000041639	5	9	28309	0.0380005	Syne1	synaptic nuclear envelope 1 Gene [Source:MGI Symbol;Acc:MGI:1927152]
ENSMUST00000099269	5	9	28309	0.0380005	Cd93	CD93 antigen Gene [Source:MGI Symbol;Acc:MGI:106664]
ENSMUST00000115094	5	9	28309	0.0380005	Xiap	X-linked inhibitor of apoptosis Gene [Source:MGI Symbol;Acc:MGI:107572]
ENSMUST00000089743	5	9	28309	0.0380005	Gabpb1	GA repeat binding protein, beta 1 Gene [Source:MGI Symbol;Acc:MGI:95611]
ENSMUST00000027494	5	9	28309	0.0380005	Ppp1r7	protein phosphatase 1, regulatory (inhibitor) subunit 7 Gene [Source:MGI Symbol;Acc:MGI:1913635]
ENSMUST00000074425	6	13	28309	0.0380005	4732418C07Rik	RIKEN cDNA 4732418C07 gene Gene [Source:MGI Symbol;Acc:MGI:2442397]
ENSMUST00000112871	6	13	28309	0.0380005	Cxcl12	chemokine (C-X-C motif) ligand 12 Gene [Source:MGI Symbol;Acc:MGI:103556]
ENSMUST00000077817	5	9	28309	0.0380005	Hnrnph1	heterogeneous nuclear ribonucleoprotein H1 Gene [Source:MGI Symbol;Acc:MGI:1891925]
ENSMUST00000115161	5	9	28309	0.0380005	Bend6	BEN domain containing 6 Gene [Source:MGI Symbol;Acc:MGI:2444572]
ENSMUST00000116514	6	13	28309	0.0380005	Wbp11	WW domain binding protein 11 Gene [Source:MGI Symbol;Acc:MGI:1891823]
ENSMUST00000095752	5	9	28309	0.0380005	Tia1	cytotoxic granule-associated RNA binding protein 1 Gene [Source:MGI Symbol;Acc:MGI:107914]
ENSMUST00000112255	5	9	28309	0.0380005	Piga	phosphatidylinositol glycan anchor biosynthesis, class A Gene [Source:MGI Symbol;Acc:MGI:99461]
ENSMUST00000118110	5	9	28309	0.0380005	Arrdc4	arrestin domain containing 4 Gene [Source:MGI Symbol;Acc:MGI:1913662]
ENSMUST00000090896	6	13	28309	0.0380005	Cobll1	Cobl-like 1 Gene [Source:MGI Symbol;Acc:MGI:2442894]
ENSMUST00000033866	5	9	28309	0.0380005	Vps36	vacuolar protein sorting 36 (yeast) Gene [Source:MGI Symbol;Acc:MGI:1917410]
ENSMUST00000057793	5	9	28309	0.0380005	Adnp	activity-dependent neuroprotective protein Gene [Source:MGI Symbol;Acc:MGI:1338758]
ENSMUST00000110849	6	13	28309	0.0380005	Rcor3	REST corepressor 3 Gene [Source:MGI Symbol;Acc:MGI:2441920]
ENSMUST00000098588	6	13	28309	0.0380005	NA	NA
ENSMUST00000056559	5	9	28309	0.0380005	Omg	oligodendrocyte myelin glycoprotein Gene [Source:MGI Symbol;Acc:MGI:106586]
ENSMUST00000066674	5	9	28309	0.0380005	Car8	carbonic anhydrase 8 Gene [Source:MGI Symbol;Acc:MGI:88253]
ENSMUST00000073014	6	13	28309	0.0380005	Gm8991	predicted pseudogene 8991 Pseudogene [Source:MGI Symbol;Acc:MGI:3644227]
ENSMUST00000024005	5	9	28309	0.0380005	Scg5	secretogranin V Gene [Source:MGI Symbol;Acc:MGI:98289]
ENSMUST00000021405	5	9	28309	0.0380005	Polr2h	polymerase (RNA) II (DNA directed) polypeptide H Gene [Source:MGI Symbol;Acc:MGI:2384309]
ENSMUST00000085631	6	13	28309	0.0380005	Gm7589	predicted gene 7589 Gene [Source:MGI Symbol;Acc:MGI:3644073]
ENSMUST00000117440	6	13	28309	0.0380005	Chpt1	choline phosphotransferase 1 Gene [Source:MGI Symbol;Acc:MGI:2384841]
ENSMUST00000098290	5	9	28309	0.0380005	Car8	carbonic anhydrase 8 Gene [Source:MGI Symbol;Acc:MGI:88253]
ENSMUST00000119954	5	9	28309	0.0380005	Pcf11	cleavage and polyadenylation factor subunit homolog (S. cerevisiae) Gene [Source:MGI Symbol;Acc:MGI:1919579]
ENSMUST00000027035	6	13	28309	0.0380005	Sox17	SRY-box containing gene 17 Gene [Source:MGI Symbol;Acc:MGI:107543]
ENSMUST00000072292	6	13	28309	0.0380005	Zfp280c	zinc finger protein 280C Gene [Source:MGI Symbol;Acc:MGI:2387585]
ENSMUST00000112863	6	13	28309	0.0380005	Pak3	p21 protein (Cdc42/Rac)-activated kinase 3 Gene [Source:MGI Symbol;Acc:MGI:1339656]
ENSMUST00000034519	6	13	28309	0.0380005	Crtam	cytotoxic and regulatory T cell molecule Gene [Source:MGI Symbol;Acc:MGI:1859822]
ENSMUST00000087464	5	9	28309	0.0380005	NA	NA
ENSMUST00000088767	6	13	28309	0.0380005	Elf1	E74-like factor 1 Gene [Source:MGI Symbol;Acc:MGI:107180]
ENSMUST00000042450	6	13	28309	0.0380005	Rmi1	RMI1, RecQ mediated genome instability 1, homolog (S. cerevisiae) Gene [Source:MGI Symbol;Acc:MGI:1921636]
ENSMUST00000044825	6	13	28309	0.0380005	2310003L22Rik	RIKEN cDNA 2310003L22 gene Gene [Source:MGI Symbol;Acc:MGI:1916737]
ENSMUST00000085012	6	13	28309	0.0380005	Setd3	SET domain containing 3 Gene [Source:MGI Symbol;Acc:MGI:1289184]
ENSMUST00000066043	5	9	28309	0.0380005	NA	NA
ENSMUST00000096265	5	9	28309	0.0380005	Foxr2	forkhead box R2 Gene [Source:MGI Symbol;Acc:MGI:3511682]
ENSMUST00000022341	6	13	28309	0.0380005	2700060E02Rik	RIKEN cDNA 2700060E02 gene Gene [Source:MGI Symbol;Acc:MGI:1915295]
ENSMUST00000000271	6	13	28309	0.0380005	NA	NA
ENSMUST00000033503	6	13	28309	0.0380005	Glod5	glyoxalase domain containing 5 Gene [Source:MGI Symbol;Acc:MGI:1917074]
ENSMUST00000120093	5	9	28309	0.0380005	Rpl36a-ps3	ribosomal protein L36A, pseudogene 3 Pseudogene [Source:MGI Symbol;Acc:MGI:3642503]
ENSMUST00000116266	5	9	28309	0.0380005	NA	NA
ENSMUST00000111744	6	13	28309	0.0380005	Ktn1	kinectin 1 Gene [Source:MGI Symbol;Acc:MGI:109153]
ENSMUST00000027736	11	39	28309	0.0392484	Zc3h11a	zinc finger CCCH type containing 11A Gene [Source:MGI Symbol;Acc:MGI:1917829]
ENSMUST00000088216	9	28	28309	0.0420293	Dst	dystonin Gene [Source:MGI Symbol;Acc:MGI:104627]
ENSMUST00000027232	9	28	28309	0.0420293	Ptp4a1	protein tyrosine phosphatase 4a1 Gene [Source:MGI Symbol;Acc:MGI:1277096]
ENSMUST00000003122	7	18	28309	0.0451356	AC131675.1	predicted gene, EG626954 [Source:RefSeq peptide;Acc:NP_001182695]
ENSMUST00000025293	7	18	28309	0.0451356	Ndfip1	Nedd4 family interacting protein 1 Gene [Source:MGI Symbol;Acc:MGI:1929601]
ENSMUST00000100054	7	18	28309	0.0451356	Nhsl1	NHS-like 1 Gene [Source:MGI Symbol;Acc:MGI:106390]
ENSMUST00000094951	8	23	28309	0.0452818	Scn1a	sodium channel, voltage-gated, type I, alpha Gene [Source:MGI Symbol;Acc:MGI:98246]
ENSMUST00000068452	8	23	28309	0.0452818	Cnot1	CCR4-NOT transcription complex, subunit 1 Gene [Source:MGI Symbol;Acc:MGI:2442402]
ENSMUST00000110595	3	3	28309	0.0456789	Gm3415	predicted gene 3415 Gene [Source:MGI Symbol;Acc:MGI:3781593]
ENSMUST00000120815	3	3	28309	0.0456789	Gm14069	predicted gene 14069 Pseudogene [Source:MGI Symbol;Acc:MGI:3652232]
ENSMUST00000092138	3	3	28309	0.0456789	Gm10348	predicted gene 10348 Gene [Source:MGI Symbol;Acc:MGI:3642350]
ENSMUST00000106596	3	3	28309	0.0456789	Stxbp3a	syntaxin binding protein 3A Gene [Source:MGI Symbol;Acc:MGI:107362]
ENSMUST00000081370	3	3	28309	0.0456789	Gm10060	predicted gene 10060 Pseudogene [Source:MGI Symbol;Acc:MGI:3710638]
ENSMUST00000114193	3	3	28309	0.0456789	Atp5j	ATP synthase, H+ transporting, mitochondrial F0 complex, subunit F Gene [Source:MGI Symbol;Acc:MGI:107777]
ENSMUST00000110597	3	3	28309	0.0456789	Gm3402	predicted gene 3402 Gene [Source:MGI Symbol;Acc:MGI:3781580]
ENSMUST00000084301	10	34	28309	0.0458424	Macf1	microtubule-actin crosslinking factor 1 Gene [Source:MGI Symbol;Acc:MGI:108559]
ENSMUST00000106516	4	6	28309	0.0522581	Lyrm1	LYR motif containing 1 Gene [Source:MGI Symbol;Acc:MGI:1921169]
ENSMUST00000033211	4	6	28309	0.0522581	Trim30d	tripartite motif-containing 30D Gene [Source:MGI Symbol;Acc:MGI:3035181]
ENSMUST00000079620	4	6	28309	0.0522581	Olfr847	olfactory receptor 847 Gene [Source:MGI Symbol;Acc:MGI:3030681]
ENSMUST00000034940	4	6	28309	0.0522581	Usp3	ubiquitin specific peptidase 3 Gene [Source:MGI Symbol;Acc:MGI:2152450]
ENSMUST00000112323	4	6	28309	0.0522581	Rbm6	RNA binding motif protein 6 Gene [Source:MGI Symbol;Acc:MGI:1338037]
ENSMUST00000108829	4	6	28309	0.0522581	Zfp672	zinc finger protein 672 Gene [Source:MGI Symbol;Acc:MGI:2442105]
ENSMUST00000107096	4	6	28309	0.0522581	Rps3	ribosomal protein S3 Gene [Source:MGI Symbol;Acc:MGI:1350917]
ENSMUST00000098275	4	6	28309	0.0522581	Asph	aspartate-beta-hydroxylase Gene [Source:MGI Symbol;Acc:MGI:1914186]
ENSMUST00000020685	4	6	28309	0.0522581	Pttg1	pituitary tumor-transforming gene 1 Gene [Source:MGI Symbol;Acc:MGI:1353578]
ENSMUST00000112995	4	6	28309	0.0522581	Tsc22d3	TSC22 domain family, member 3 Gene [Source:MGI Symbol;Acc:MGI:1196284]
ENSMUST00000082421	4	6	28309	0.0522581	mt-Cytb	mitochondrially encoded cytochrome b Gene [Source:MGI Symbol;Acc:MGI:102501]
ENSMUST00000095529	4	6	28309	0.0522581	Fgf14	fibroblast growth factor 14 Gene [Source:MGI Symbol;Acc:MGI:109189]
ENSMUST00000100813	4	6	28309	0.0522581	Gm10395	predicted gene 10395 Gene [Source:MGI Symbol;Acc:MGI:3711260]
ENSMUST00000051241	4	6	28309	0.0522581	Zfp36	zinc finger protein 36 Gene [Source:MGI Symbol;Acc:MGI:99180]
ENSMUST00000021880	4	6	28309	0.0522581	Ctla2a	cytotoxic T lymphocyte-associated protein 2 alpha Gene [Source:MGI Symbol;Acc:MGI:88554]
ENSMUST00000021479	4	6	28309	0.0522581	Actr10	ARP10 actin-related protein 10 homolog (S. cerevisiae) Gene [Source:MGI Symbol;Acc:MGI:1891654]
ENSMUST00000030578	4	6	28309	0.0522581	Ptp4a2	protein tyrosine phosphatase 4a2 Gene [Source:MGI Symbol;Acc:MGI:1277117]
ENSMUST00000084630	4	6	28309	0.0522581	NA	NA
ENSMUST00000051881	4	6	28309	0.0522581	NA	NA
ENSMUST00000059249	4	6	28309	0.0522581	Gm13654	predicted gene 13654 Pseudogene [Source:MGI Symbol;Acc:MGI:3650907]
ENSMUST00000035373	6	14	28309	0.0535834	NA	NA
ENSMUST00000120566	6	14	28309	0.0535834	Gm12183	predicted gene 12183 Pseudogene [Source:MGI Symbol;Acc:MGI:3652175]
ENSMUST00000107057	6	14	28309	0.0535834	Nfia	nuclear factor I/A Gene [Source:MGI Symbol;Acc:MGI:108056]
ENSMUST00000020703	6	14	28309	0.0535834	Gabra6	gamma-aminobutyric acid (GABA) A receptor, subunit alpha 6 Gene [Source:MGI Symbol;Acc:MGI:95618]
ENSMUST00000023344	6	14	28309	0.0535834	Slc35a5	solute carrier family 35, member A5 Gene [Source:MGI Symbol;Acc:MGI:1921352]
ENSMUST00000072322	6	14	28309	0.0535834	NA	NA
ENSMUST00000027337	6	14	28309	0.0535834	Fam135a	family with sequence similarity 135, member A Gene [Source:MGI Symbol;Acc:MGI:1915437]
ENSMUST00000094269	6	14	28309	0.0535834	NA	NA
ENSMUST00000039173	6	14	28309	0.0535834	2310035C23Rik	RIKEN cDNA 2310035C23 gene Gene [Source:MGI Symbol;Acc:MGI:1922832]
ENSMUST00000089221	6	14	28309	0.0535834	Gm10232	predicted pseudogene 10232 Pseudogene [Source:MGI Symbol;Acc:MGI:3641637]
ENSMUST00000085947	6	14	28309	0.0535834	Gm11518	predicted gene 11518 Pseudogene [Source:MGI Symbol;Acc:MGI:3650306]
ENSMUST00000089950	6	14	28309	0.0535834	Rabggtb	RAB geranylgeranyl transferase, b subunit Gene [Source:MGI Symbol;Acc:MGI:99537]
ENSMUST00000087063	6	14	28309	0.0535834	Gm5560	predicted pseudogene 5560 Pseudogene [Source:MGI Symbol;Acc:MGI:3647980]
ENSMUST00000112088	10	35	28309	0.0542619	Pbrm1	polybromo 1 Gene [Source:MGI Symbol;Acc:MGI:1923998]
ENSMUST00000114582	8	24	28309	0.0561324	Hmgb3	high mobility group box 3 Gene [Source:MGI Symbol;Acc:MGI:1098219]
ENSMUST00000111961	8	24	28309	0.0561324	Hnrnpa3	heterogeneous nuclear ribonucleoprotein A3 Gene [Source:MGI Symbol;Acc:MGI:1917171]
ENSMUST00000112585	5	10	28309	0.0562136	Apobec1	apolipoprotein B mRNA editing enzyme, catalytic polypeptide 1 Gene [Source:MGI Symbol;Acc:MGI:103298]
ENSMUST00000078021	7	19	28309	0.0562136	Glmn	glomulin, FKBP associated protein Gene [Source:MGI Symbol;Acc:MGI:2141180]
ENSMUST00000026625	5	10	28309	0.0562136	Clybl	citrate lyase beta like Gene [Source:MGI Symbol;Acc:MGI:1916884]
ENSMUST00000089215	5	10	28309	0.0562136	Cntn6	contactin 6 Gene [Source:MGI Symbol;Acc:MGI:1858223]
ENSMUST00000057784	7	19	28309	0.0562136	Slc7a2	solute carrier family 7 (cationic amino acid transporter, y+ system), member 2 Gene [Source:MGI Symbol;Acc:MGI:99828]
ENSMUST00000103172	5	10	28309	0.0562136	Dstn	destrin Gene [Source:MGI Symbol;Acc:MGI:1929270]
ENSMUST00000100542	5	10	28309	0.0562136	Ly6c2	lymphocyte antigen 6 complex, locus C2 Gene [Source:MGI Symbol;Acc:MGI:3712069]
ENSMUST00000121575	7	19	28309	0.0562136	Gm12630	predicted gene 12630 Pseudogene [Source:MGI Symbol;Acc:MGI:3650968]
ENSMUST00000087511	5	10	28309	0.0562136	Tmem128	transmembrane protein 128 Gene [Source:MGI Symbol;Acc:MGI:1913559]
ENSMUST00000100373	5	10	28309	0.0562136	NA	NA
ENSMUST00000072576	5	10	28309	0.0562136	Srp19	signal recognition particle 19 Gene [Source:MGI Symbol;Acc:MGI:1913634]
ENSMUST00000078374	5	10	28309	0.0562136	2610101N10Rik	RIKEN cDNA 2610101N10 gene Gene [Source:MGI Symbol;Acc:MGI:1915208]
ENSMUST00000110054	5	10	28309	0.0562136	Use1	unconventional SNARE in the ER 1 homolog (S. cerevisiae) Gene [Source:MGI Symbol;Acc:MGI:1914273]
ENSMUST00000101137	5	10	28309	0.0562136	Gm5647	predicted gene 5647 Gene [Source:MGI Symbol;Acc:MGI:3646587]
ENSMUST00000048965	5	10	28309	0.0562136	Gm9752	predicted gene 9752 Gene [Source:MGI Symbol;Acc:MGI:3641896]
ENSMUST00000113182	5	10	28309	0.0562136	Rad18	RAD18 homolog (S. cerevisiae) Gene [Source:MGI Symbol;Acc:MGI:1890476]
ENSMUST00000067996	7	19	28309	0.0562136	Set	SET nuclear oncogene Gene [Source:MGI Symbol;Acc:MGI:1860267]
ENSMUST00000021217	7	19	28309	0.0562136	Nme2	non-metastatic cells 2, protein (NM23B) expressed in Gene [Source:MGI Symbol;Acc:MGI:97356]
ENSMUST00000016279	5	10	28309	0.0562136	N4bp2l1	NEDD4 binding protein 2-like 1 Gene [Source:MGI Symbol;Acc:MGI:2140872]
ENSMUST00000121433	5	10	28309	0.0562136	Ube2e3	ubiquitin-conjugating enzyme E2E 3, UBC4/5 homolog (yeast) Gene [Source:MGI Symbol;Acc:MGI:107412]
ENSMUST00000064167	5	10	28309	0.0562136	Rnf11	ring finger protein 11 Gene [Source:MGI Symbol;Acc:MGI:1352759]
ENSMUST00000084892	5	10	28309	0.0562136	Dpy19l4	dpy-19-like 4 (C. elegans) Gene [Source:MGI Symbol;Acc:MGI:2685869]
ENSMUST00000071438	7	19	28309	0.0562136	NA	NA
ENSMUST00000075603	5	10	28309	0.0562136	Glra1	glycine receptor, alpha 1 subunit Gene [Source:MGI Symbol;Acc:MGI:95747]
ENSMUST00000114577	5	10	28309	0.0562136	2610030H06Rik	RIKEN cDNA 2610030H06 gene Gene [Source:MGI Symbol;Acc:MGI:1914298]
ENSMUST00000119883	5	10	28309	0.0562136	Gm7363	predicted gene 7363 Pseudogene [Source:MGI Symbol;Acc:MGI:3646407]
ENSMUST00000095623	5	10	28309	0.0562136	NA	NA
ENSMUST00000057272	23	124	28309	0.0562136	4932438A13Rik	RIKEN cDNA 4932438A13 gene Gene [Source:MGI Symbol;Acc:MGI:2444631]
ENSMUST00000113629	5	10	28309	0.0562136	Vps13c	vacuolar protein sorting 13C (yeast) Gene [Source:MGI Symbol;Acc:MGI:2444207]
ENSMUST00000112602	5	10	28309	0.0562136	4430402I18Rik	RIKEN cDNA 4430402I18 gene Gene [Source:MGI Symbol;Acc:MGI:1918036]
ENSMUST00000078718	7	19	28309	0.0562136	Gm9242	predicted pseudogene 9242 Pseudogene [Source:MGI Symbol;Acc:MGI:3645172]
ENSMUST00000041111	5	10	28309	0.0562136	Shfm1	split hand/foot malformation (ectrodactyly) type 1 Gene [Source:MGI Symbol;Acc:MGI:109238]
ENSMUST00000008445	5	10	28309	0.0562136	Phax	phosphorylated adaptor for RNA export Gene [Source:MGI Symbol;Acc:MGI:1891839]
ENSMUST00000092452	5	10	28309	0.0562136	Herc4	hect domain and RLD 4 Gene [Source:MGI Symbol;Acc:MGI:1914595]
ENSMUST00000020258	5	10	28309	0.0562136	Herc4	hect domain and RLD 4 Gene [Source:MGI Symbol;Acc:MGI:1914595]
ENSMUST00000102621	5	10	28309	0.0562136	Stxbp3a	syntaxin binding protein 3A Gene [Source:MGI Symbol;Acc:MGI:107362]
ENSMUST00000112634	5	10	28309	0.0562136	Galnt13	UDP-N-acetyl-alpha-D-galactosamine:polypeptide N-acetylgalactosaminyltransferase 13 Gene [Source:MGI Symbol;Acc:MGI:2139447]
ENSMUST00000096369	5	10	28309	0.0562136	Klhl15	kelch-like 15 (Drosophila) Gene [Source:MGI Symbol;Acc:MGI:1923400]
ENSMUST00000107505	5	10	28309	0.0562136	Syt11	synaptotagmin XI Gene [Source:MGI Symbol;Acc:MGI:1859547]
ENSMUST00000068569	5	10	28309	0.0562136	Bcl2a1b	B-cell leukemia/lymphoma 2 related protein A1b Gene [Source:MGI Symbol;Acc:MGI:1278326]
ENSMUST00000052725	5	10	28309	0.0562136	Sc5d	sterol-C5-desaturase (fungal ERG3, delta-5-desaturase) homolog (S. cerevisae) Gene [Source:MGI Symbol;Acc:MGI:1353611]
ENSMUST00000111460	5	10	28309	0.0562136	2700078E11Rik	RIKEN cDNA 2700078E11 gene Gene [Source:MGI Symbol;Acc:MGI:1926082]
ENSMUST00000058187	5	10	28309	0.0562136	NA	NA
ENSMUST00000101214	5	10	28309	0.0562136	Kcnip4	Kv channel interacting protein 4 Gene [Source:MGI Symbol;Acc:MGI:1933131]
ENSMUST00000104907	9	30	28309	0.0590672	NA	NA
ENSMUST00000022474	10	36	28309	0.0619447	Pbrm1	polybromo 1 Gene [Source:MGI Symbol;Acc:MGI:1923998]
ENSMUST00000112092	10	36	28309	0.0619447	Pbrm1	polybromo 1 Gene [Source:MGI Symbol;Acc:MGI:1923998]
ENSMUST00000048155	8	25	28309	0.0683517	Rbm25	RNA binding motif protein 25 Gene [Source:MGI Symbol;Acc:MGI:1914289]
ENSMUST00000074417	6	15	28309	0.0708851	Eif5	eukaryotic translation initiation factor 5 Gene [Source:MGI Symbol;Acc:MGI:95309]
ENSMUST00000117108	6	15	28309	0.0708851	Art3	ADP-ribosyltransferase 3 Gene [Source:MGI Symbol;Acc:MGI:1202729]
ENSMUST00000101213	6	15	28309	0.0708851	Acsl6	acyl-CoA synthetase long-chain family member 6 Gene [Source:MGI Symbol;Acc:MGI:894291]
ENSMUST00000022377	6	15	28309	0.0708851	Txndc16	thioredoxin domain containing 16 Gene [Source:MGI Symbol;Acc:MGI:1917811]
ENSMUST00000075872	6	15	28309	0.0708851	Mysm1	myb-like, SWIRM and MPN domains 1 Gene [Source:MGI Symbol;Acc:MGI:2444584]
ENSMUST00000011323	6	15	28309	0.0708851	Odc1	ornithine decarboxylase, structural 1 Gene [Source:MGI Symbol;Acc:MGI:97402]
ENSMUST00000066979	6	15	28309	0.0708851	NA	NA
ENSMUST00000049185	6	15	28309	0.0708851	A130042E20Rik	RIKEN cDNA A130042E20 gene Gene [Source:MGI Symbol;Acc:MGI:2656825]
ENSMUST00000042167	6	15	28309	0.0708851	Pgcp	plasma glutamate carboxypeptidase Gene [Source:MGI Symbol;Acc:MGI:1889205]
ENSMUST00000031104	6	15	28309	0.0708851	Pds5a	PDS5, regulator of cohesion maintenance, homolog A (S. cerevisiae) Gene [Source:MGI Symbol;Acc:MGI:1918771]
ENSMUST00000028863	6	15	28309	0.0708851	2310003L22Rik	RIKEN cDNA 2310003L22 gene Gene [Source:MGI Symbol;Acc:MGI:1916737]
ENSMUST00000029046	6	15	28309	0.0708851	Fabp5	fatty acid binding protein 5, epidermal Gene [Source:MGI Symbol;Acc:MGI:101790]
ENSMUST00000111468	6	15	28309	0.0708851	Mtch2	mitochondrial carrier homolog 2 (C. elegans) Gene [Source:MGI Symbol;Acc:MGI:1929260]
ENSMUST00000102955	6	15	28309	0.0708851	Cetn4	centrin 4 Gene [Source:MGI Symbol;Acc:MGI:2677454]
ENSMUST00000001335	6	15	28309	0.0708851	Pfdn5	prefoldin 5 Gene [Source:MGI Symbol;Acc:MGI:1928753]
ENSMUST00000091987	6	15	28309	0.0708851	Smt3h2-ps	SMT3 suppressor of mif two 3 homolog 2, pseudogene (S. cerevisiae) Pseudogene [Source:MGI Symbol;Acc:MGI:1859622]
ENSMUST00000121987	6	15	28309	0.0708851	Kctd14	potassium channel tetramerisation domain containing 14 Gene [Source:MGI Symbol;Acc:MGI:1289222]
ENSMUST00000001044	6	15	28309	0.0708851	Snapin	SNAP-associated protein Gene [Source:MGI Symbol;Acc:MGI:1333745]
ENSMUST00000109289	6	15	28309	0.0708851	Kif21a	kinesin family member 21A Gene [Source:MGI Symbol;Acc:MGI:109188]
ENSMUST00000120071	7	20	28309	0.0715206	Psd3	pleckstrin and Sec7 domain containing 3 Gene [Source:MGI Symbol;Acc:MGI:1918215]
ENSMUST00000025278	7	20	28309	0.0715206	Mrpl27	mitochondrial ribosomal protein L27 Gene [Source:MGI Symbol;Acc:MGI:2137224]
ENSMUST00000091130	7	20	28309	0.0715206	Gm5641	predicted gene 5641 Pseudogene [Source:MGI Symbol;Acc:MGI:3645731]
ENSMUST00000107249	7	20	28309	0.0715206	Rpl27	ribosomal protein L27 Gene [Source:MGI Symbol;Acc:MGI:98036]
ENSMUST00000045142	7	20	28309	0.0715206	Ctnnal1	catenin (cadherin associated protein), alpha-like 1 Gene [Source:MGI Symbol;Acc:MGI:1859649]
ENSMUST00000086090	9	31	28309	0.0720577	NA	NA
ENSMUST00000112094	9	31	28309	0.0720577	Pbrm1	polybromo 1 Gene [Source:MGI Symbol;Acc:MGI:1923998]
ENSMUST00000100818	4	7	28309	0.0805545	D14Ertd449e	DNA segment, Chr 14, ERATO Doi 449, expressed Gene [Source:MGI Symbol;Acc:MGI:1196450]
ENSMUST00000025580	5	11	28309	0.0805545	Ms4a6b	membrane-spanning 4-domains, subfamily A, member 6B Gene [Source:MGI Symbol;Acc:MGI:1917024]
ENSMUST00000116289	4	7	28309	0.0805545	Alg8	asparagine-linked glycosylation 8 homolog (yeast, alpha-1,3-glucosyltransferase) Gene [Source:MGI Symbol;Acc:MGI:2141959]
ENSMUST00000053033	4	7	28309	0.0805545	D1Ertd622e	DNA segment, Chr 1, ERATO Doi 622, expressed Gene [Source:MGI Symbol;Acc:MGI:1277184]
ENSMUST00000118593	4	7	28309	0.0805545	Csf1	colony stimulating factor 1 (macrophage) Gene [Source:MGI Symbol;Acc:MGI:1339753]
ENSMUST00000106319	9	32	28309	0.0805545	Ppih	peptidyl prolyl isomerase H Gene [Source:MGI Symbol;Acc:MGI:106499]
ENSMUST00000037298	5	11	28309	0.0805545	NA	NA
ENSMUST00000112529	5	11	28309	0.0805545	Sms	spermine synthase Gene [Source:MGI Symbol;Acc:MGI:109490]
ENSMUST00000104983	4	7	28309	0.0805545	B020018G12Rik	RIKEN cDNA B020018G12 gene Gene [Source:MGI Symbol;Acc:MGI:3612447]
ENSMUST00000061537	4	7	28309	0.0805545	2810025M15Rik	RIKEN cDNA 2810025M15 gene Gene [Source:MGI Symbol;Acc:MGI:1917203]
ENSMUST00000026699	5	11	28309	0.0805545	Mkln1	muskelin 1, intracellular mediator containing kelch motifs Gene [Source:MGI Symbol;Acc:MGI:1351638]
ENSMUST00000098163	4	7	28309	0.0805545	Zfp292	zinc finger protein 292 Gene [Source:MGI Symbol;Acc:MGI:1353423]
ENSMUST00000112080	10	38	28309	0.0805545	Pbrm1	polybromo 1 Gene [Source:MGI Symbol;Acc:MGI:1923998]
ENSMUST00000113753	5	11	28309	0.0805545	Tprkb	Tp53rk binding protein Gene [Source:MGI Symbol;Acc:MGI:1917036]
ENSMUST00000112098	10	38	28309	0.0805545	Pbrm1	polybromo 1 Gene [Source:MGI Symbol;Acc:MGI:1923998]
ENSMUST00000018561	4	7	28309	0.0805545	Myo1b	myosin IB Gene [Source:MGI Symbol;Acc:MGI:107752]
ENSMUST00000110000	5	11	28309	0.0805545	Naa20	N(alpha)-acetyltransferase 20, NatB catalytic subunit Gene [Source:MGI Symbol;Acc:MGI:1915127]
ENSMUST00000032715	5	11	28309	0.0805545	Prmt3	protein arginine N-methyltransferase 3 Gene [Source:MGI Symbol;Acc:MGI:1919224]
ENSMUST00000028104	4	7	28309	0.0805545	NA	NA
ENSMUST00000079045	4	7	28309	0.0805545	B230325K18Rik	RIKEN cDNA B230325K18 gene Gene [Source:MGI Symbol;Acc:MGI:2442200]
ENSMUST00000111745	5	11	28309	0.0805545	Ktn1	kinectin 1 Gene [Source:MGI Symbol;Acc:MGI:109153]
ENSMUST00000122290	4	7	28309	0.0805545	Ndufb5	NADH dehydrogenase (ubiquinone) 1 beta subcomplex, 5 Gene [Source:MGI Symbol;Acc:MGI:1913296]
ENSMUST00000027111	5	11	28309	0.0805545	Ndufs1	NADH dehydrogenase (ubiquinone) Fe-S protein 1 Gene [Source:MGI Symbol;Acc:MGI:2443241]
ENSMUST00000112571	5	11	28309	0.0805545	Dpy30	dpy-30 homolog (C. elegans) Gene [Source:MGI Symbol;Acc:MGI:1913560]
ENSMUST00000033163	5	11	28309	0.0805545	Mettl9	methyltransferase like 9 Gene [Source:MGI Symbol;Acc:MGI:1914862]
ENSMUST00000022494	4	7	28309	0.0805545	Ebpl	emopamil binding protein-like Gene [Source:MGI Symbol;Acc:MGI:1915427]
ENSMUST00000079659	5	11	28309	0.0805545	2610101N10Rik	RIKEN cDNA 2610101N10 gene Gene [Source:MGI Symbol;Acc:MGI:1915208]
ENSMUST00000002699	5	11	28309	0.0805545	Akap8	A kinase (PRKA) anchor protein 8 Gene [Source:MGI Symbol;Acc:MGI:1928488]
ENSMUST00000020896	5	11	28309	0.0805545	Tspan13	tetraspanin 13 Gene [Source:MGI Symbol;Acc:MGI:1913359]
ENSMUST00000022418	4	7	28309	0.0805545	Gm9746	predicted gene 9746 Gene [Source:MGI Symbol;Acc:MGI:3710397]
ENSMUST00000122366	4	7	28309	0.0805545	Gm13669	predicted gene 13669 Pseudogene [Source:MGI Symbol;Acc:MGI:3651174]
ENSMUST00000110142	5	11	28309	0.0805545	Gpcpd1	glycerophosphocholine phosphodiesterase GDE1 homolog (S. cerevisiae) Gene [Source:MGI Symbol;Acc:MGI:104898]
ENSMUST00000118554	5	11	28309	0.0805545	Gm13167	predicted gene 13167 Pseudogene [Source:MGI Symbol;Acc:MGI:3650208]
ENSMUST00000067929	5	11	28309	0.0805545	Far1	fatty acyl CoA reductase 1 Gene [Source:MGI Symbol;Acc:MGI:1914670]
ENSMUST00000002837	4	7	28309	0.0805545	Tmed5	transmembrane emp24 protein transport domain containing 5 Gene [Source:MGI Symbol;Acc:MGI:1921586]
ENSMUST00000038613	5	11	28309	0.0805545	Gm15430	predicted gene 15430 Pseudogene [Source:MGI Symbol;Acc:MGI:3705781]
ENSMUST00000034303	5	11	28309	0.0805545	Mphosph6	M phase phosphoprotein 6 Gene [Source:MGI Symbol;Acc:MGI:1915783]
ENSMUST00000009425	5	11	28309	0.0805545	Rarres2	retinoic acid receptor responder (tazarotene induced) 2 Gene [Source:MGI Symbol;Acc:MGI:1918910]
ENSMUST00000092404	4	7	28309	0.0805545	Srsf2	serine/arginine-rich splicing factor 2 Gene [Source:MGI Symbol;Acc:MGI:98284]
ENSMUST00000022946	5	11	28309	0.0805545	Hrsp12	heat-responsive protein 12 Gene [Source:MGI Symbol;Acc:MGI:1095401]
ENSMUST00000020538	5	11	28309	0.0805545	Xpo1	exportin 1, CRM1 homolog (yeast) Gene [Source:MGI Symbol;Acc:MGI:2144013]
ENSMUST00000096251	4	7	28309	0.0805545	1810009A15Rik	RIKEN cDNA 1810009A15 gene Gene [Source:MGI Symbol;Acc:MGI:1913526]
ENSMUST00000098310	5	11	28309	0.0805545	Sytl2	synaptotagmin-like 2 Gene [Source:MGI Symbol;Acc:MGI:1933366]
ENSMUST00000120466	4	7	28309	0.0805545	Gm13217	predicted gene 13217 Pseudogene [Source:MGI Symbol;Acc:MGI:3649713]
ENSMUST00000115373	5	11	28309	0.0805545	NA	NA
ENSMUST00000028727	5	11	28309	0.0805545	Snap25	synaptosomal-associated protein 25 Gene [Source:MGI Symbol;Acc:MGI:98331]
ENSMUST00000098485	5	11	28309	0.0805545	Bcl2a1a	B-cell leukemia/lymphoma 2 related protein A1a Gene [Source:MGI Symbol;Acc:MGI:102687]
ENSMUST00000119902	4	7	28309	0.0805545	Tspan2	tetraspanin 2 Gene [Source:MGI Symbol;Acc:MGI:1917997]
ENSMUST00000119726	4	7	28309	0.0805545	Gm7079	predicted pseudogene 7079 Pseudogene [Source:MGI Symbol;Acc:MGI:3643105]
ENSMUST00000082305	4	7	28309	0.0805545	Psma2	proteasome (prosome, macropain) subunit, alpha type 2 Gene [Source:MGI Symbol;Acc:MGI:104885]
ENSMUST00000048578	5	11	28309	0.0805545	Ttc1	tetratricopeptide repeat domain 1 Gene [Source:MGI Symbol;Acc:MGI:1914077]
ENSMUST00000110617	9	32	28309	0.0805545	2410089E03Rik	RIKEN cDNA 2410089E03 gene Gene [Source:MGI Symbol;Acc:MGI:1920942]
ENSMUST00000035739	5	11	28309	0.0805545	Tusc3	tumor suppressor candidate 3 Gene [Source:MGI Symbol;Acc:MGI:1933134]
ENSMUST00000063103	5	11	28309	0.0805545	1700048O20Rik	RIKEN cDNA 1700048O20 gene Gene [Source:MGI Symbol;Acc:MGI:1920637]
ENSMUST00000100819	4	7	28309	0.0805545	D14Ertd449e	DNA segment, Chr 14, ERATO Doi 449, expressed Gene [Source:MGI Symbol;Acc:MGI:1196450]
ENSMUST00000119896	4	7	28309	0.0805545	Ssr3	signal sequence receptor, gamma Gene [Source:MGI Symbol;Acc:MGI:1914687]
ENSMUST00000021530	5	11	28309	0.0805545	Hif1a	hypoxia inducible factor 1, alpha subunit Gene [Source:MGI Symbol;Acc:MGI:106918]
ENSMUST00000081650	5	11	28309	0.0805545	Rpl3	ribosomal protein L3 Gene [Source:MGI Symbol;Acc:MGI:1351605]
ENSMUST00000115055	4	7	28309	0.0805545	Fam107b	family with sequence similarity 107, member B Gene [Source:MGI Symbol;Acc:MGI:1913790]
ENSMUST00000025050	4	7	28309	0.0805545	Nudt3	nudix (nucleotide diphosphate linked moiety X)-type motif 3 Gene [Source:MGI Symbol;Acc:MGI:1928484]
ENSMUST00000029846	5	11	28309	0.0805545	Cyr61	cysteine rich protein 61 Gene [Source:MGI Symbol;Acc:MGI:88613]
ENSMUST00000025872	5	11	28309	0.0805545	4430402I18Rik	RIKEN cDNA 4430402I18 gene Gene [Source:MGI Symbol;Acc:MGI:1918036]
ENSMUST00000087195	4	7	28309	0.0805545	Ociad2	OCIA domain containing 2 Gene [Source:MGI Symbol;Acc:MGI:1916377]
ENSMUST00000120920	5	11	28309	0.0805545	Gm15801	predicted gene 15801 Pseudogene [Source:MGI Symbol;Acc:MGI:3779625]
ENSMUST00000098486	5	11	28309	0.0805545	Bcl2a1d	B-cell leukemia/lymphoma 2 related protein A1d Gene [Source:MGI Symbol;Acc:MGI:1278325]
ENSMUST00000000430	5	11	28309	0.0805545	Galnt1	UDP-N-acetyl-alpha-D-galactosamine:polypeptide N-acetylgalactosaminyltransferase 1 Gene [Source:MGI Symbol;Acc:MGI:894693]
ENSMUST00000099452	4	7	28309	0.0805545	Ctxn2	cortexin 2 Gene [Source:MGI Symbol;Acc:MGI:2139444]
ENSMUST00000027215	4	7	28309	0.0805545	1700029F09Rik	RIKEN cDNA 1700029F09 gene Gene [Source:MGI Symbol;Acc:MGI:1922873]
ENSMUST00000075251	5	11	28309	0.0805545	Gm5582	predicted gene 5582 Pseudogene [Source:MGI Symbol;Acc:MGI:3643463]
ENSMUST00000095852	5	11	28309	0.0805545	Grid2	glutamate receptor, ionotropic, delta 2 Gene [Source:MGI Symbol;Acc:MGI:95813]
ENSMUST00000085571	5	11	28309	0.0805545	Pan3	PAN3 polyA specific ribonuclease subunit homolog (S. cerevisiae) Gene [Source:MGI Symbol;Acc:MGI:1919837]
ENSMUST00000113004	5	11	28309	0.0805545	NA	NA
ENSMUST00000016144	5	11	28309	0.0805545	Ppap2a	phosphatidic acid phosphatase type 2A Gene [Source:MGI Symbol;Acc:MGI:108412]
ENSMUST00000120318	4	7	28309	0.0805545	Gm13493	predicted gene 13493 Pseudogene [Source:MGI Symbol;Acc:MGI:3650824]
ENSMUST00000098613	5	11	28309	0.0805545	Usp3	ubiquitin specific peptidase 3 Gene [Source:MGI Symbol;Acc:MGI:2152450]
ENSMUST00000118173	5	11	28309	0.0805545	Gm6274	predicted gene 6274 Pseudogene [Source:MGI Symbol;Acc:MGI:3645367]
ENSMUST00000116437	5	11	28309	0.0805545	Snap23	synaptosomal-associated protein 23 Gene [Source:MGI Symbol;Acc:MGI:109356]
ENSMUST00000085271	5	11	28309	0.0805545	Prmt3	protein arginine N-methyltransferase 3 Gene [Source:MGI Symbol;Acc:MGI:1919224]
ENSMUST00000110706	5	11	28309	0.0805545	Haus2	HAUS augmin-like complex, subunit 2 Gene [Source:MGI Symbol;Acc:MGI:1913546]
ENSMUST00000074245	5	11	28309	0.0805545	Gm10119	predicted gene 10119 Gene [Source:MGI Symbol;Acc:MGI:3642853]
ENSMUST00000121853	7	21	28309	0.08447	Gm11263	predicted gene 11263 Pseudogene [Source:MGI Symbol;Acc:MGI:3651899]
ENSMUST00000042166	7	21	28309	0.08447	Fam103a1	family with sequence similarity 103, member A1 Gene [Source:MGI Symbol;Acc:MGI:1914398]
ENSMUST00000113211	7	21	28309	0.08447	Rpl36a	ribosomal protein L36A Gene [Source:MGI Symbol;Acc:MGI:1201789]
ENSMUST00000098054	7	21	28309	0.08447	NA	NA
ENSMUST00000028839	6	16	28309	0.0856989	Gabpb1	GA repeat binding protein, beta 1 Gene [Source:MGI Symbol;Acc:MGI:95611]
ENSMUST00000050732	6	16	28309	0.0856989	Kctd14	potassium channel tetramerisation domain containing 14 Gene [Source:MGI Symbol;Acc:MGI:1289222]
ENSMUST00000113573	6	16	28309	0.0856989	Atrx	alpha thalassemia/mental retardation syndrome X-linked homolog (human) Gene [Source:MGI Symbol;Acc:MGI:103067]
ENSMUST00000045218	6	16	28309	0.0856989	Pcm1	pericentriolar material 1 Gene [Source:MGI Symbol;Acc:MGI:1277958]
ENSMUST00000031144	6	16	28309	0.0856989	Tmem165	transmembrane protein 165 Gene [Source:MGI Symbol;Acc:MGI:894407]
ENSMUST00000003870	6	16	28309	0.0856989	Mxi1	Max interacting protein 1 Gene [Source:MGI Symbol;Acc:MGI:97245]
ENSMUST00000113561	6	16	28309	0.0856989	NA	NA
ENSMUST00000105230	6	16	28309	0.0856989	Sarnp	SAP domain containing ribonucleoprotein Gene [Source:MGI Symbol;Acc:MGI:1913368]
ENSMUST00000039077	6	16	28309	0.0856989	Ccdc11	coiled-coil domain containing 11 Gene [Source:MGI Symbol;Acc:MGI:1921703]
ENSMUST00000102736	6	16	28309	0.0856989	Nrd1	nardilysin, N-arginine dibasic convertase, NRD convertase 1 Gene [Source:MGI Symbol;Acc:MGI:1201386]
ENSMUST00000014911	6	16	28309	0.0856989	Tbp	TATA box binding protein Gene [Source:MGI Symbol;Acc:MGI:101838]
ENSMUST00000088671	6	16	28309	0.0856989	Gm6161	predicted gene 6161 Pseudogene [Source:MGI Symbol;Acc:MGI:3644104]
ENSMUST00000092266	6	16	28309	0.0856989	Tdg	thymine DNA glycosylase Gene [Source:MGI Symbol;Acc:MGI:108247]
ENSMUST00000090569	6	16	28309	0.0856989	Psma5	proteasome (prosome, macropain) subunit, alpha type 5 Gene [Source:MGI Symbol;Acc:MGI:1347009]
ENSMUST00000017435	6	16	28309	0.0856989	Taok1	TAO kinase 1 Gene [Source:MGI Symbol;Acc:MGI:1914490]
ENSMUST00000020112	6	16	28309	0.0856989	Uhrf1bp1l	UHRF1 (ICBP90) binding protein 1-like Gene [Source:MGI Symbol;Acc:MGI:2442888]
ENSMUST00000073043	6	16	28309	0.0856989	Cxcl12	chemokine (C-X-C motif) ligand 12 Gene [Source:MGI Symbol;Acc:MGI:103556]
ENSMUST00000112689	6	16	28309	0.0856989	Pxk	PX domain containing serine/threonine kinase Gene [Source:MGI Symbol;Acc:MGI:1289230]
ENSMUST00000078804	6	16	28309	0.0856989	Rpl35a	ribosomal protein L35A Gene [Source:MGI Symbol;Acc:MGI:1928894]
ENSMUST00000022039	6	16	28309	0.0856989	Golm1	golgi membrane protein 1 Gene [Source:MGI Symbol;Acc:MGI:1917329]
ENSMUST00000115205	9	33	28309	0.0963963	Dlg1	discs, large homolog 1 (Drosophila) Gene [Source:MGI Symbol;Acc:MGI:107231]
ENSMUST00000115027	5	12	28309	0.10696	Cald1	caldesmon 1 Gene [Source:MGI Symbol;Acc:MGI:88250]
ENSMUST00000069902	5	12	28309	0.10696	Nnt	nicotinamide nucleotide transhydrogenase Gene [Source:MGI Symbol;Acc:MGI:109279]
ENSMUST00000037408	5	12	28309	0.10696	Scaper	S phase cyclin A-associated protein in the ER Gene [Source:MGI Symbol;Acc:MGI:1925976]
ENSMUST00000020308	3	4	28309	0.10696	Ddit4	DNA-damage-inducible transcript 4 Gene [Source:MGI Symbol;Acc:MGI:1921997]
ENSMUST00000101432	5	12	28309	0.10696	Npas3	neuronal PAS domain protein 3 Gene [Source:MGI Symbol;Acc:MGI:1351610]
ENSMUST00000108555	5	12	28309	0.10696	Gm16874	predicted gene, 16874 Gene [Source:MGI Symbol;Acc:MGI:4439798]
ENSMUST00000022734	5	12	28309	0.10696	Dnajc3	DnaJ (Hsp40) homolog, subfamily C, member 3 Gene [Source:MGI Symbol;Acc:MGI:107373]
ENSMUST00000108325	5	12	28309	0.10696	Cp	ceruloplasmin Gene [Source:MGI Symbol;Acc:MGI:88476]
ENSMUST00000109208	5	12	28309	0.10696	NA	NA
ENSMUST00000119147	5	12	28309	0.10696	Rpl9-ps3	ribosomal protein L9, pseudogene 3 Pseudogene [Source:MGI Symbol;Acc:MGI:3650675]
ENSMUST00000088614	5	12	28309	0.10696	Kif21a	kinesin family member 21A Gene [Source:MGI Symbol;Acc:MGI:109188]
ENSMUST00000109704	5	12	28309	0.10696	E2f1	E2F transcription factor 1 Gene [Source:MGI Symbol;Acc:MGI:101941]
ENSMUST00000119478	5	12	28309	0.10696	Gm12852	predicted gene 12852 Pseudogene [Source:MGI Symbol;Acc:MGI:3651942]
ENSMUST00000045905	5	12	28309	0.10696	Fermt2	fermitin family homolog 2 (Drosophila) Gene [Source:MGI Symbol;Acc:MGI:2385001]
ENSMUST00000078079	5	12	28309	0.10696	Eif1a	eukaryotic translation initiation factor 1A Gene [Source:MGI Symbol;Acc:MGI:95298]
ENSMUST00000115357	5	12	28309	0.10696	Cadps2	Ca2+-dependent activator protein for secretion 2 Gene [Source:MGI Symbol;Acc:MGI:2443963]
ENSMUST00000033640	5	12	28309	0.10696	Pak3	p21 protein (Cdc42/Rac)-activated kinase 3 Gene [Source:MGI Symbol;Acc:MGI:1339656]
ENSMUST00000060101	5	12	28309	0.10696	Tceal8	transcription elongation factor A (SII)-like 8 Gene [Source:MGI Symbol;Acc:MGI:1913934]
ENSMUST00000113555	5	12	28309	0.10696	Fnbp1	formin binding protein 1 Gene [Source:MGI Symbol;Acc:MGI:109606]
ENSMUST00000076352	3	4	28309	0.10696	Serpinb1a	serine (or cysteine) peptidase inhibitor, clade B, member 1a Gene [Source:MGI Symbol;Acc:MGI:1913472]
ENSMUST00000021933	5	12	28309	0.10696	Ctsl	cathepsin L Gene [Source:MGI Symbol;Acc:MGI:88564]
ENSMUST00000029968	5	12	28309	0.10696	Rars2	arginyl-tRNA synthetase 2, mitochondrial Gene [Source:MGI Symbol;Acc:MGI:1923596]
ENSMUST00000114497	3	4	28309	0.10696	Hnmt	histamine N-methyltransferase Gene [Source:MGI Symbol;Acc:MGI:2153181]
ENSMUST00000047910	5	12	28309	0.10696	Metap2	methionine aminopeptidase 2 Gene [Source:MGI Symbol;Acc:MGI:1929701]
ENSMUST00000070762	5	12	28309	0.10696	Ktn1	kinectin 1 Gene [Source:MGI Symbol;Acc:MGI:109153]
ENSMUST00000076922	5	12	28309	0.10696	Trim30a	tripartite motif-containing 30A Gene [Source:MGI Symbol;Acc:MGI:98178]
ENSMUST00000119571	5	12	28309	0.10696	Gm14586	predicted gene 14586 Pseudogene [Source:MGI Symbol;Acc:MGI:3705507]
ENSMUST00000108334	3	4	28309	0.10696	Asph	aspartate-beta-hydroxylase Gene [Source:MGI Symbol;Acc:MGI:1914186]
ENSMUST00000086790	5	12	28309	0.10696	NA	NA
ENSMUST00000020974	3	4	28309	0.10696	Id2	inhibitor of DNA binding 2 Gene [Source:MGI Symbol;Acc:MGI:96397]
ENSMUST00000055593	3	4	28309	0.10696	Gm8258	predicted gene 8258 Pseudogene [Source:MGI Symbol;Acc:MGI:3644429]
ENSMUST00000111895	5	12	28309	0.10696	Wapal	wings apart-like homolog (Drosophila) Gene [Source:MGI Symbol;Acc:MGI:2675859]
ENSMUST00000082149	5	12	28309	0.10696	Cab39	calcium binding protein 39 Gene [Source:MGI Symbol;Acc:MGI:107438]
ENSMUST00000095941	3	4	28309	0.10696	Fbxo34	F-box protein 34 Gene [Source:MGI Symbol;Acc:MGI:1926188]
ENSMUST00000066940	3	4	28309	0.10696	Gtf2h2	general transcription factor II H, polypeptide 2 Gene [Source:MGI Symbol;Acc:MGI:1345669]
ENSMUST00000028083	5	12	28309	0.10696	Psmb7	proteasome (prosome, macropain) subunit, beta type 7 Gene [Source:MGI Symbol;Acc:MGI:107637]
ENSMUST00000019937	7	22	28309	0.10696	Sec63	SEC63-like (S. cerevisiae) Gene [Source:MGI Symbol;Acc:MGI:2155302]
ENSMUST00000039207	3	4	28309	0.10696	3830406C13Rik	RIKEN cDNA 3830406C13 gene Gene [Source:MGI Symbol;Acc:MGI:1917937]
ENSMUST00000051663	5	12	28309	0.10696	Rnf113a2	ring finger protein 113A2 Gene [Source:MGI Symbol;Acc:MGI:1913631]
ENSMUST00000098901	3	4	28309	0.10696	6820431F20Rik	RIKEN cDNA 6820431F20 gene Pseudogene [Source:MGI Symbol;Acc:MGI:3694236]
ENSMUST00000097682	5	12	28309	0.10696	Rpl27-ps3	ribosomal protein L27, pseudogene 3 Pseudogene [Source:MGI Symbol;Acc:MGI:3646174]
ENSMUST00000122082	3	4	28309	0.10696	Gm12517	predicted gene 12517 Pseudogene [Source:MGI Symbol;Acc:MGI:3649535]
ENSMUST00000101367	5	12	28309	0.10696	Nt5c3	5'-nucleotidase, cytosolic III Gene [Source:MGI Symbol;Acc:MGI:1927186]
ENSMUST00000117979	5	12	28309	0.10696	Gm11189	predicted gene 11189 Pseudogene [Source:MGI Symbol;Acc:MGI:3650984]
ENSMUST00000113997	5	12	28309	0.10696	Ppp6r3	protein phosphatase 6, regulatory subunit 3 Gene [Source:MGI Symbol;Acc:MGI:1921807]
ENSMUST00000053575	3	4	28309	0.10696	Gm8186	predicted gene 8186 Pseudogene [Source:MGI Symbol;Acc:MGI:3643110]
ENSMUST00000033176	5	12	28309	0.10696	Uqcrc2	ubiquinol cytochrome c reductase core protein 2 Gene [Source:MGI Symbol;Acc:MGI:1914253]
ENSMUST00000109586	5	12	28309	0.10696	Sertad2	SERTA domain containing 2 Gene [Source:MGI Symbol;Acc:MGI:1931026]
ENSMUST00000100036	5	12	28309	0.10696	Sgk1	serum/glucocorticoid regulated kinase 1 Gene [Source:MGI Symbol;Acc:MGI:1340062]
ENSMUST00000098473	7	22	28309	0.10696	Cnot1	CCR4-NOT transcription complex, subunit 1 Gene [Source:MGI Symbol;Acc:MGI:2442402]
ENSMUST00000099821	5	12	28309	0.10696	Lgals8	lectin, galactose binding, soluble 8 Gene [Source:MGI Symbol;Acc:MGI:1928481]
ENSMUST00000062289	5	12	28309	0.10696	Bend6	BEN domain containing 6 Gene [Source:MGI Symbol;Acc:MGI:2444572]
ENSMUST00000112864	5	12	28309	0.10696	Pak3	p21 protein (Cdc42/Rac)-activated kinase 3 Gene [Source:MGI Symbol;Acc:MGI:1339656]
ENSMUST00000108199	3	4	28309	0.10696	Fut9	fucosyltransferase 9 Gene [Source:MGI Symbol;Acc:MGI:1330859]
ENSMUST00000080316	3	4	28309	0.10696	Tctex1d2	Tctex1 domain containing 2 Gene [Source:MGI Symbol;Acc:MGI:1913311]
ENSMUST00000054387	5	12	28309	0.10696	Rab33b	RAB33B, member of RAS oncogene family Gene [Source:MGI Symbol;Acc:MGI:1330805]
ENSMUST00000107725	5	12	28309	0.10696	Tgfbr1	transforming growth factor, beta receptor I Gene [Source:MGI Symbol;Acc:MGI:98728]
ENSMUST00000077111	5	12	28309	0.10696	Rpl9-ps3	ribosomal protein L9, pseudogene 3 Pseudogene [Source:MGI Symbol;Acc:MGI:3650675]
ENSMUST00000051239	3	4	28309	0.10696	1110032A04Rik	RIKEN cDNA 1110032A04 gene Gene [Source:MGI Symbol;Acc:MGI:1913433]
ENSMUST00000037726	5	12	28309	0.10696	Tmtc4	transmembrane and tetratricopeptide repeat containing 4 Gene [Source:MGI Symbol;Acc:MGI:1921050]
ENSMUST00000020234	5	12	28309	0.10696	Timp3	tissue inhibitor of metalloproteinase 3 Gene [Source:MGI Symbol;Acc:MGI:98754]
ENSMUST00000121705	5	12	28309	0.10696	Stx4a	syntaxin 4A (placental) Gene [Source:MGI Symbol;Acc:MGI:893577]
ENSMUST00000053965	6	17	28309	0.108491	Gm7324	predicted gene 7324 Pseudogene [Source:MGI Symbol;Acc:MGI:3646999]
ENSMUST00000033994	6	17	28309	0.108491	Rbpms	RNA binding protein gene with multiple splicing Gene [Source:MGI Symbol;Acc:MGI:1334446]
ENSMUST00000041264	6	17	28309	0.108491	B230315N10Rik	RIKEN cDNA B230315N10 gene Gene [Source:MGI Symbol;Acc:MGI:3621440]
ENSMUST00000018992	6	17	28309	0.108491	Rars	arginyl-tRNA synthetase Gene [Source:MGI Symbol;Acc:MGI:1914297]
ENSMUST00000098748	6	17	28309	0.108491	Scaper	S phase cyclin A-associated protein in the ER Gene [Source:MGI Symbol;Acc:MGI:1925976]
ENSMUST00000034722	6	17	28309	0.108491	Rab27a	RAB27A, member RAS oncogene family Gene [Source:MGI Symbol;Acc:MGI:1861441]
ENSMUST00000022260	6	17	28309	0.108491	Gm5457	predicted pseudogene 5457 Pseudogene [Source:MGI Symbol;Acc:MGI:3646665]
ENSMUST00000102792	6	17	28309	0.108491	Inadl	InaD-like (Drosophila) Gene [Source:MGI Symbol;Acc:MGI:1277960]
ENSMUST00000027173	6	17	28309	0.108491	Wdr12	WD repeat domain 12 Gene [Source:MGI Symbol;Acc:MGI:1927241]
ENSMUST00000033720	6	17	28309	0.108491	Rbbp7	retinoblastoma binding protein 7 Gene [Source:MGI Symbol;Acc:MGI:1194910]
ENSMUST00000106657	6	17	28309	0.108491	Zfyve9	zinc finger, FYVE domain containing 9 Gene [Source:MGI Symbol;Acc:MGI:2652838]
ENSMUST00000112087	6	17	28309	0.108491	Tnnt2	troponin T2, cardiac Gene [Source:MGI Symbol;Acc:MGI:104597]
ENSMUST00000020543	6	17	28309	0.108491	Cpeb4	cytoplasmic polyadenylation element binding protein 4 Gene [Source:MGI Symbol;Acc:MGI:1914829]
ENSMUST00000117438	6	17	28309	0.108491	Wdr12	WD repeat domain 12 Gene [Source:MGI Symbol;Acc:MGI:1927241]
ENSMUST00000107075	4	8	28309	0.117656	Gjc1	gap junction protein, gamma 1 Gene [Source:MGI Symbol;Acc:MGI:95718]
ENSMUST00000033054	4	8	28309	0.117656	Adm	adrenomedullin Gene [Source:MGI Symbol;Acc:MGI:108058]
ENSMUST00000105617	4	8	28309	0.117656	Ipcef1	interaction protein for cytohesin exchange factors 1 Gene [Source:MGI Symbol;Acc:MGI:2444159]
ENSMUST00000106639	4	8	28309	0.117656	NA	NA
ENSMUST00000071737	4	8	28309	0.117656	Gm10126	predicted gene 10126 Gene [Source:MGI Symbol;Acc:MGI:3809072]
ENSMUST00000099594	4	8	28309	0.117656	Prune2	prune homolog 2 (Drosophila) Gene [Source:MGI Symbol;Acc:MGI:1925004]
ENSMUST00000032844	4	8	28309	0.117656	Tmem126a	transmembrane protein 126A Gene [Source:MGI Symbol;Acc:MGI:1913521]
ENSMUST00000033282	4	8	28309	0.117656	Bccip	BRCA2 and CDKN1A interacting protein Gene [Source:MGI Symbol;Acc:MGI:1913415]
ENSMUST00000075723	4	8	28309	0.117656	Gm13493	predicted gene 13493 Pseudogene [Source:MGI Symbol;Acc:MGI:3650824]
ENSMUST00000049285	4	8	28309	0.117656	Lrrn1	leucine rich repeat protein 1, neuronal Gene [Source:MGI Symbol;Acc:MGI:106038]
ENSMUST00000106112	4	8	28309	0.117656	Bnip3	BCL2/adenovirus E1B interacting protein 3 Gene [Source:MGI Symbol;Acc:MGI:109326]
ENSMUST00000100811	4	8	28309	0.117656	Gm10395	predicted gene 10395 Gene [Source:MGI Symbol;Acc:MGI:3711260]
ENSMUST00000100806	4	8	28309	0.117656	Gm9746	predicted gene 9746 Gene [Source:MGI Symbol;Acc:MGI:3710397]
ENSMUST00000118873	4	8	28309	0.117656	Gm6382	predicted gene 6382 Pseudogene [Source:MGI Symbol;Acc:MGI:3646438]
ENSMUST00000029277	4	8	28309	0.117656	Spata5	spermatogenesis associated 5 Gene [Source:MGI Symbol;Acc:MGI:1927170]
ENSMUST00000097642	4	8	28309	0.117656	Myeov2	myeloma overexpressed 2 Gene [Source:MGI Symbol;Acc:MGI:1914165]
ENSMUST00000089915	4	8	28309	0.117656	Casc4	cancer susceptibility candidate 4 Gene [Source:MGI Symbol;Acc:MGI:2443129]
ENSMUST00000108144	4	8	28309	0.117656	NA	NA
ENSMUST00000022417	4	8	28309	0.117656	D14Ertd449e	DNA segment, Chr 14, ERATO Doi 449, expressed Gene [Source:MGI Symbol;Acc:MGI:1196450]
ENSMUST00000112343	4	8	28309	0.117656	NA	NA
ENSMUST00000114191	4	8	28309	0.117656	Atp5j	ATP synthase, H+ transporting, mitochondrial F0 complex, subunit F Gene [Source:MGI Symbol;Acc:MGI:107777]
ENSMUST00000050584	4	8	28309	0.117656	0610010O12Rik	RIKEN cDNA 0610010O12 gene Gene [Source:MGI Symbol;Acc:MGI:1913310]
ENSMUST00000034766	4	8	28309	0.117656	Rora	RAR-related orphan receptor alpha Gene [Source:MGI Symbol;Acc:MGI:104661]
ENSMUST00000020253	4	8	28309	0.117656	Chpt1	choline phosphotransferase 1 Gene [Source:MGI Symbol;Acc:MGI:2384841]
ENSMUST00000053522	4	8	28309	0.117656	Dpy19l4	dpy-19-like 4 (C. elegans) Gene [Source:MGI Symbol;Acc:MGI:2685869]
ENSMUST00000020085	4	8	28309	0.117656	Ube2d1	ubiquitin-conjugating enzyme E2D 1, UBC4/5 homolog (yeast) Gene [Source:MGI Symbol;Acc:MGI:2384911]
ENSMUST00000120327	4	8	28309	0.117656	Tmem175	transmembrane protein 175 Gene [Source:MGI Symbol;Acc:MGI:1919642]
ENSMUST00000032065	4	8	28309	0.117656	Pcyox1	prenylcysteine oxidase 1 Gene [Source:MGI Symbol;Acc:MGI:1914131]
ENSMUST00000098471	4	8	28309	0.117656	Atr	ataxia telangiectasia and Rad3 related Gene [Source:MGI Symbol;Acc:MGI:108028]
ENSMUST00000099651	4	8	28309	0.117656	NA	NA
ENSMUST00000099278	4	8	28309	0.117656	Plk1s1	polo-like kinase 1 substrate 1 Gene [Source:MGI Symbol;Acc:MGI:2684960]
ENSMUST00000116468	4	8	28309	0.117656	Mphosph8	M-phase phosphoprotein 8 Gene [Source:MGI Symbol;Acc:MGI:1922589]
ENSMUST00000117292	4	8	28309	0.117656	Gm15516	predicted gene 15516 Pseudogene [Source:MGI Symbol;Acc:MGI:3782963]
ENSMUST00000021345	4	8	28309	0.117656	Gtf2a1	general transcription factor II A, 1 Gene [Source:MGI Symbol;Acc:MGI:1933277]
ENSMUST00000099764	4	8	28309	0.117656	Olfr1254	olfactory receptor 1254 Gene [Source:MGI Symbol;Acc:MGI:3031088]
ENSMUST00000099547	4	8	28309	0.117656	C78339	expressed sequence C78339 Gene [Source:MGI Symbol;Acc:MGI:2145496]
ENSMUST00000055875	4	8	28309	0.117656	Bola3	bolA-like 3 (E. coli) Gene [Source:MGI Symbol;Acc:MGI:1925903]
ENSMUST00000043089	4	8	28309	0.117656	Scx	scleraxis Gene [Source:MGI Symbol;Acc:MGI:102934]
ENSMUST00000111719	4	8	28309	0.117656	Lyrm5	LYR motif containing 5 Gene [Source:MGI Symbol;Acc:MGI:1914886]
ENSMUST00000022503	4	8	28309	0.117656	NA	NA
ENSMUST00000106453	4	8	28309	0.117656	Rbbp6	retinoblastoma binding protein 6 Gene [Source:MGI Symbol;Acc:MGI:894835]
ENSMUST00000107718	4	8	28309	0.117656	Kdelr1	KDEL (Lys-Asp-Glu-Leu) endoplasmic reticulum protein retention receptor 1 Gene [Source:MGI Symbol;Acc:MGI:1915387]
ENSMUST00000122026	4	8	28309	0.117656	Lias	lipoic acid synthetase Gene [Source:MGI Symbol;Acc:MGI:1934604]
ENSMUST00000045898	4	8	28309	0.117656	Pcyt1b	phosphate cytidylyltransferase 1, choline, beta isoform Gene [Source:MGI Symbol;Acc:MGI:2147987]
ENSMUST00000071942	4	8	28309	0.117656	Csde1	cold shock domain containing E1, RNA binding Gene [Source:MGI Symbol;Acc:MGI:92356]
ENSMUST00000115868	4	8	28309	0.117656	NA	NA
ENSMUST00000075610	4	8	28309	0.117656	Pstk	phosphoseryl-tRNA kinase Gene [Source:MGI Symbol;Acc:MGI:2685945]
ENSMUST00000055184	4	8	28309	0.117656	Gp1ba	glycoprotein 1b, alpha polypeptide Gene [Source:MGI Symbol;Acc:MGI:1333744]
ENSMUST00000053593	4	8	28309	0.117656	Rap2c	RAP2C, member of RAS oncogene family Gene [Source:MGI Symbol;Acc:MGI:1919315]
ENSMUST00000021860	4	8	28309	0.117656	Ly86	lymphocyte antigen 86 Gene [Source:MGI Symbol;Acc:MGI:1321404]
ENSMUST00000091627	4	8	28309	0.117656	C78339	expressed sequence C78339 Gene [Source:MGI Symbol;Acc:MGI:2145496]
ENSMUST00000080850	4	8	28309	0.117656	NA	NA
ENSMUST00000030254	4	8	28309	0.117656	Leprot	leptin receptor overlapping transcript Gene [Source:MGI Symbol;Acc:MGI:2687005]
ENSMUST00000084770	4	8	28309	0.117656	Fut9	fucosyltransferase 9 Gene [Source:MGI Symbol;Acc:MGI:1330859]
ENSMUST00000053075	4	8	28309	0.117656	Sphkap	SPHK1 interactor, AKAP domain containing Gene [Source:MGI Symbol;Acc:MGI:1924879]
ENSMUST00000009174	4	8	28309	0.117656	Pdcl	phosducin-like Gene [Source:MGI Symbol;Acc:MGI:1914716]
ENSMUST00000020967	4	8	28309	0.117656	Pfn4	profilin family, member 4 Gene [Source:MGI Symbol;Acc:MGI:1920121]
ENSMUST00000110194	4	8	28309	0.117656	Rnf24	ring finger protein 24 Gene [Source:MGI Symbol;Acc:MGI:1261771]
ENSMUST00000037585	7	23	28309	0.118877	Fam116a	family with sequence similarity 116, member A Gene [Source:MGI Symbol;Acc:MGI:2442980]
ENSMUST00000119878	7	23	28309	0.118877	Dyrk1a	dual-specificity tyrosine-(Y)-phosphorylation regulated kinase 1a Gene [Source:MGI Symbol;Acc:MGI:1330299]
ENSMUST00000085507	7	23	28309	0.118877	Gm6254	predicted gene 6254 Pseudogene [Source:MGI Symbol;Acc:MGI:3648838]
ENSMUST00000109196	7	23	28309	0.118877	NA	NA
ENSMUST00000097415	7	23	28309	0.118877	Gm11585	predicted gene 11585 Pseudogene [Source:MGI Symbol;Acc:MGI:3651395]
ENSMUST00000097785	9	35	28309	0.120786	Dst	dystonin Gene [Source:MGI Symbol;Acc:MGI:104627]
ENSMUST00000097789	9	35	28309	0.120786	Dst	dystonin Gene [Source:MGI Symbol;Acc:MGI:104627]
ENSMUST00000102898	9	35	28309	0.120786	Rpl7a	ribosomal protein L7A Gene [Source:MGI Symbol;Acc:MGI:1353472]
ENSMUST00000036004	9	35	28309	0.120786	Hnrnpa1	heterogeneous nuclear ribonucleoprotein A1 Gene [Source:MGI Symbol;Acc:MGI:104820]
ENSMUST00000119745	8	29	28309	0.123561	Gm13864	predicted gene 13864 Pseudogene [Source:MGI Symbol;Acc:MGI:3651491]
ENSMUST00000046131	6	18	28309	0.133924	H2-K1	histocompatibility 2, K1, K region Gene [Source:MGI Symbol;Acc:MGI:95904]
ENSMUST00000102599	5	13	28309	0.133924	Sync	syncoilin Gene [Source:MGI Symbol;Acc:MGI:1916078]
ENSMUST00000022140	5	13	28309	0.133924	Ocln	occludin Gene [Source:MGI Symbol;Acc:MGI:106183]
ENSMUST00000025846	6	18	28309	0.133924	Ppp6r3	protein phosphatase 6, regulatory subunit 3 Gene [Source:MGI Symbol;Acc:MGI:1921807]
ENSMUST00000038772	5	13	28309	0.133924	Tmem5	transmembrane protein 5 Gene [Source:MGI Symbol;Acc:MGI:2384919]
ENSMUST00000045994	5	13	28309	0.133924	Rbm34	RNA binding motif protein 34 Gene [Source:MGI Symbol;Acc:MGI:1098653]
ENSMUST00000023698	5	13	28309	0.133924	Gcfc1	GC-rich sequence DNA-binding factor 1 Gene [Source:MGI Symbol;Acc:MGI:1914617]
ENSMUST00000119154	5	13	28309	0.133924	Usp46	ubiquitin specific peptidase 46 Gene [Source:MGI Symbol;Acc:MGI:1916977]
ENSMUST00000033739	5	13	28309	0.133924	Car5b	carbonic anhydrase 5b, mitochondrial Gene [Source:MGI Symbol;Acc:MGI:1926249]
ENSMUST00000108518	5	13	28309	0.133924	Nlrp1a	NLR family, pyrin domain containing 1A Gene [Source:MGI Symbol;Acc:MGI:2684861]
ENSMUST00000121693	5	13	28309	0.133924	Rab27b	RAB27b, member RAS oncogene family Gene [Source:MGI Symbol;Acc:MGI:1931295]
ENSMUST00000118522	5	13	28309	0.133924	Gcfc1	GC-rich sequence DNA-binding factor 1 Gene [Source:MGI Symbol;Acc:MGI:1914617]
ENSMUST00000091309	5	13	28309	0.133924	Cp	ceruloplasmin Gene [Source:MGI Symbol;Acc:MGI:88476]
ENSMUST00000107765	5	13	28309	0.133924	NA	NA
ENSMUST00000039424	5	13	28309	0.133924	Kctd12b	potassium channel tetramerisation domain containing 12b Gene [Source:MGI Symbol;Acc:MGI:2444667]
ENSMUST00000071095	5	13	28309	0.133924	Setd3	SET domain containing 3 Gene [Source:MGI Symbol;Acc:MGI:1289184]
ENSMUST00000108329	5	13	28309	0.133924	Cp	ceruloplasmin Gene [Source:MGI Symbol;Acc:MGI:88476]
ENSMUST00000120389	5	13	28309	0.133924	Snx12	sorting nexin 12 Gene [Source:MGI Symbol;Acc:MGI:1919331]
ENSMUST00000020653	5	13	28309	0.133924	Sar1b	SAR1 gene homolog B (S. cerevisiae) Gene [Source:MGI Symbol;Acc:MGI:1913647]
ENSMUST00000105266	5	13	28309	0.133924	Cnot2	CCR4-NOT transcription complex, subunit 2 Gene [Source:MGI Symbol;Acc:MGI:1919318]
ENSMUST00000067980	5	13	28309	0.133924	Amy1	amylase 1, salivary Gene [Source:MGI Symbol;Acc:MGI:88019]
ENSMUST00000120594	5	13	28309	0.133924	Cadm2	cell adhesion molecule 2 Gene [Source:MGI Symbol;Acc:MGI:2442722]
ENSMUST00000041418	5	13	28309	0.133924	Stag1	stromal antigen 1 Gene [Source:MGI Symbol;Acc:MGI:1098658]
ENSMUST00000106860	5	13	28309	0.133924	Trim33	tripartite motif-containing 33 Gene [Source:MGI Symbol;Acc:MGI:2137357]
ENSMUST00000110424	5	13	28309	0.133924	Gabpb1	GA repeat binding protein, beta 1 Gene [Source:MGI Symbol;Acc:MGI:95611]
ENSMUST00000029643	5	13	28309	0.133924	Gar1	GAR1 ribonucleoprotein homolog (yeast) Gene [Source:MGI Symbol;Acc:MGI:1930948]
ENSMUST00000048192	5	13	28309	0.133924	Haus1	HAUS augmin-like complex, subunit 1 Gene [Source:MGI Symbol;Acc:MGI:2385076]
ENSMUST00000046754	5	13	28309	0.133924	Brp44l	brain protein 44-like Gene [Source:MGI Symbol;Acc:MGI:1915240]
ENSMUST00000027797	6	18	28309	0.133924	Nvl	nuclear VCP-like Gene [Source:MGI Symbol;Acc:MGI:1914709]
ENSMUST00000112984	5	13	28309	0.133924	Ms4a3	membrane-spanning 4-domains, subfamily A, member 3 Gene [Source:MGI Symbol;Acc:MGI:2158468]
ENSMUST00000030288	5	13	28309	0.133924	Osbpl9	oxysterol binding protein-like 9 Gene [Source:MGI Symbol;Acc:MGI:1923784]
ENSMUST00000029149	10	42	28309	0.133924	Rbm39	RNA binding motif protein 39 Gene [Source:MGI Symbol;Acc:MGI:2157953]
ENSMUST00000029444	5	13	28309	0.133924	Trim33	tripartite motif-containing 33 Gene [Source:MGI Symbol;Acc:MGI:2137357]
ENSMUST00000035950	5	13	28309	0.133924	NA	NA
ENSMUST00000049324	5	13	28309	0.133924	Flt3	FMS-like tyrosine kinase 3 Gene [Source:MGI Symbol;Acc:MGI:95559]
ENSMUST00000084365	5	13	28309	0.133924	Osbpl9	oxysterol binding protein-like 9 Gene [Source:MGI Symbol;Acc:MGI:1923784]
ENSMUST00000084366	5	13	28309	0.133924	Osbpl9	oxysterol binding protein-like 9 Gene [Source:MGI Symbol;Acc:MGI:1923784]
ENSMUST00000108327	5	13	28309	0.133924	NA	NA
ENSMUST00000097666	5	13	28309	0.133924	Cab39	calcium binding protein 39 Gene [Source:MGI Symbol;Acc:MGI:107438]
ENSMUST00000112321	5	13	28309	0.133924	NA	NA
ENSMUST00000112371	6	18	28309	0.133924	Scn1a	sodium channel, voltage-gated, type I, alpha Gene [Source:MGI Symbol;Acc:MGI:98246]
ENSMUST00000110104	5	13	28309	0.133924	Zc3h14	zinc finger CCCH type containing 14 Gene [Source:MGI Symbol;Acc:MGI:1919824]
ENSMUST00000041274	6	18	28309	0.133924	NA	NA
ENSMUST00000071781	6	18	28309	0.133924	Gm10123	predicted pseudogene 10123 Pseudogene [Source:MGI Symbol;Acc:MGI:3704342]
ENSMUST00000031224	5	13	28309	0.133924	Tgfbr3	transforming growth factor, beta receptor III Gene [Source:MGI Symbol;Acc:MGI:104637]
ENSMUST00000112990	5	13	28309	0.133924	Mid2	midline 2 Gene [Source:MGI Symbol;Acc:MGI:1344333]
ENSMUST00000053414	5	13	28309	0.133924	4930473A06Rik	RIKEN cDNA 4930473A06 gene Gene [Source:MGI Symbol;Acc:MGI:1922152]
ENSMUST00000100640	5	13	28309	0.133924	Sqle	squalene epoxidase Gene [Source:MGI Symbol;Acc:MGI:109296]
ENSMUST00000058232	5	13	28309	0.133924	Xpa	xeroderma pigmentosum, complementation group A Gene [Source:MGI Symbol;Acc:MGI:99135]
ENSMUST00000112346	5	13	28309	0.133924	B3galt1	UDP-Gal:betaGlcNAc beta 1,3-galactosyltransferase, polypeptide 1 Gene [Source:MGI Symbol;Acc:MGI:1349403]
ENSMUST00000111640	6	18	28309	0.133924	NA	NA
ENSMUST00000055425	5	13	28309	0.133924	Phtf1	putative homeodomain transcription factor 1 Gene [Source:MGI Symbol;Acc:MGI:1332671]
ENSMUST00000106501	5	13	28309	0.133924	Extl2	exostoses (multiple)-like 2 Gene [Source:MGI Symbol;Acc:MGI:1889574]
ENSMUST00000115104	9	36	28309	0.137898	Dst	dystonin Gene [Source:MGI Symbol;Acc:MGI:104627]
ENSMUST00000062700	7	24	28309	0.142387	Gm10069	predicted gene 10069 Gene [Source:MGI Symbol;Acc:MGI:3641875]
ENSMUST00000112735	7	24	28309	0.142387	Gm3358	predicted gene 3358 Pseudogene [Source:MGI Symbol;Acc:MGI:3781536]
ENSMUST00000102483	7	24	28309	0.142387	Rpl23a	ribosomal protein L23A Gene [Source:MGI Symbol;Acc:MGI:3040672]
ENSMUST00000112437	7	24	28309	0.142387	Atl2	atlastin GTPase 2 Gene [Source:MGI Symbol;Acc:MGI:1929492]
ENSMUST00000112758	7	24	28309	0.142387	Gm3383	predicted gene 3383 Pseudogene [Source:MGI Symbol;Acc:MGI:3781561]
ENSMUST00000119219	3	5	28309	0.158218	Gm15026	predicted gene 15026 Pseudogene [Source:MGI Symbol;Acc:MGI:3705439]
ENSMUST00000098817	3	5	28309	0.158218	Vps37a	vacuolar protein sorting 37A (yeast) Gene [Source:MGI Symbol;Acc:MGI:1261835]
ENSMUST00000033480	4	9	28309	0.158218	Atp11c	ATPase, class VI, type 11C Gene [Source:MGI Symbol;Acc:MGI:1859661]
ENSMUST00000102741	4	9	28309	0.158218	Btf3l4	basic transcription factor 3-like 4 Gene [Source:MGI Symbol;Acc:MGI:1915312]
ENSMUST00000026360	4	9	28309	0.158218	Itgb8	integrin beta 8 Gene [Source:MGI Symbol;Acc:MGI:1338035]
ENSMUST00000109642	8	31	28309	0.158218	Sec61g	SEC61, gamma subunit Gene [Source:MGI Symbol;Acc:MGI:1202066]
ENSMUST00000109166	5	14	28309	0.158218	Aida	axin interactor, dorsalization associated Gene [Source:MGI Symbol;Acc:MGI:1919737]
ENSMUST00000097692	4	9	28309	0.158218	NA	NA
ENSMUST00000122233	5	14	28309	0.158218	Kif2a	kinesin family member 2A Gene [Source:MGI Symbol;Acc:MGI:108390]
ENSMUST00000098775	3	5	28309	0.158218	Fdx1	ferredoxin 1 Gene [Source:MGI Symbol;Acc:MGI:103224]
ENSMUST00000053570	4	9	28309	0.158218	4930415F15Rik	RIKEN cDNA 4930415F15 gene Gene [Source:MGI Symbol;Acc:MGI:1921112]
ENSMUST00000066627	3	5	28309	0.158218	Mat2a	methionine adenosyltransferase II, alpha Gene [Source:MGI Symbol;Acc:MGI:2443731]
ENSMUST00000030973	4	9	28309	0.158218	Prom1	prominin 1 Gene [Source:MGI Symbol;Acc:MGI:1100886]
ENSMUST00000115243	4	9	28309	0.158218	Opcml	opioid binding protein/cell adhesion molecule-like Gene [Source:MGI Symbol;Acc:MGI:97397]
ENSMUST00000003575	5	14	28309	0.158218	Tpm4	tropomyosin 4 Gene [Source:MGI Symbol;Acc:MGI:2449202]
ENSMUST00000109641	9	37	28309	0.158218	Sec61g	SEC61, gamma subunit Gene [Source:MGI Symbol;Acc:MGI:1202066]
ENSMUST00000020500	5	14	28309	0.158218	Appl2	adaptor protein, phosphotyrosine interaction, PH domain and leucine zipper containing 2 Gene [Source:MGI Symbol;Acc:MGI:2384914]
ENSMUST00000068980	4	9	28309	0.158218	Asb7	ankyrin repeat and SOCS box-containing 7 Gene [Source:MGI Symbol;Acc:MGI:2152835]
ENSMUST00000114703	4	9	28309	0.158218	Plxdc2	plexin domain containing 2 Gene [Source:MGI Symbol;Acc:MGI:1914698]
ENSMUST00000029376	4	9	28309	0.158218	Tm4sf1	transmembrane 4 superfamily member 1 Gene [Source:MGI Symbol;Acc:MGI:104678]
ENSMUST00000016463	6	19	28309	0.158218	Slc25a5	solute carrier family 25 (mitochondrial carrier, adenine nucleotide translocator), member 5 Gene [Source:MGI Symbol;Acc:MGI:1353496]
ENSMUST00000113630	4	9	28309	0.158218	Vps13c	vacuolar protein sorting 13C (yeast) Gene [Source:MGI Symbol;Acc:MGI:2444207]
ENSMUST00000025409	3	5	28309	0.158218	Lox	lysyl oxidase Gene [Source:MGI Symbol;Acc:MGI:96817]
ENSMUST00000021847	4	9	28309	0.158218	1300014I06Rik	RIKEN cDNA 1300014I06 gene Gene [Source:MGI Symbol;Acc:MGI:1914145]
ENSMUST00000100565	4	9	28309	0.158218	Spag9	sperm associated antigen 9 Gene [Source:MGI Symbol;Acc:MGI:1918084]
ENSMUST00000118817	3	5	28309	0.158218	Gm5764	predicted gene 5764 Pseudogene [Source:MGI Symbol;Acc:MGI:3645102]
ENSMUST00000115054	3	5	28309	0.158218	Fam107b	family with sequence similarity 107, member B Gene [Source:MGI Symbol;Acc:MGI:1913790]
ENSMUST00000090476	4	9	28309	0.158218	BC028528	cDNA sequence BC028528 Gene [Source:MGI Symbol;Acc:MGI:2385885]
ENSMUST00000090214	10	44	28309	0.158218	Pbrm1	polybromo 1 Gene [Source:MGI Symbol;Acc:MGI:1923998]
ENSMUST00000120130	5	14	28309	0.158218	Atp5l2	ATP synthase, H+ transporting, mitochondrial FO complex, subunit G2, pseudogene Pseudogene [Source:MGI Symbol;Acc:MGI:3649364]
ENSMUST00000119071	3	5	28309	0.158218	Gm12421	predicted gene 12421 Pseudogene [Source:MGI Symbol;Acc:MGI:3650591]
ENSMUST00000105618	3	5	28309	0.158218	NA	NA
ENSMUST00000109549	4	9	28309	0.158218	Samhd1	SAM domain and HD domain, 1 Gene [Source:MGI Symbol;Acc:MGI:1927468]
ENSMUST00000108333	3	5	28309	0.158218	Asph	aspartate-beta-hydroxylase Gene [Source:MGI Symbol;Acc:MGI:1914186]
ENSMUST00000054440	3	5	28309	0.158218	Lyrm1	LYR motif containing 1 Gene [Source:MGI Symbol;Acc:MGI:1921169]
ENSMUST00000097858	5	14	28309	0.158218	Epb4.1	erythrocyte protein band 4.1 Gene [Source:MGI Symbol;Acc:MGI:95401]
ENSMUST00000078070	3	5	28309	0.158218	Ipcef1	interaction protein for cytohesin exchange factors 1 Gene [Source:MGI Symbol;Acc:MGI:2444159]
ENSMUST00000101527	4	9	28309	0.158218	Atp11c	ATPase, class VI, type 11C Gene [Source:MGI Symbol;Acc:MGI:1859661]
ENSMUST00000021970	4	9	28309	0.158218	Cxcl14	chemokine (C-X-C motif) ligand 14 Gene [Source:MGI Symbol;Acc:MGI:1888514]
ENSMUST00000033995	5	14	28309	0.158218	Rbpms	RNA binding protein gene with multiple splicing Gene [Source:MGI Symbol;Acc:MGI:1334446]
ENSMUST00000099502	5	14	28309	0.158218	Brwd1	bromodomain and WD repeat domain containing 1 Gene [Source:MGI Symbol;Acc:MGI:1890651]
ENSMUST00000079081	3	5	28309	0.158218	Aqp4	aquaporin 4 Gene [Source:MGI Symbol;Acc:MGI:107387]
ENSMUST00000113711	4	9	28309	0.158218	Wdr34	WD repeat domain 34 Gene [Source:MGI Symbol;Acc:MGI:1919070]
ENSMUST00000105524	3	5	28309	0.158218	AC155814.1
ENSMUST00000105378	5	14	28309	0.158218	Med16	mediator complex subunit 16 Gene [Source:MGI Symbol;Acc:MGI:2158394]
ENSMUST00000056871	4	9	28309	0.158218	Vps13c	vacuolar protein sorting 13C (yeast) Gene [Source:MGI Symbol;Acc:MGI:2444207]
ENSMUST00000079118	4	9	28309	0.158218	NA	NA
ENSMUST00000107004	4	9	28309	0.158218	Alg6	asparagine-linked glycosylation 6 homolog (yeast, alpha-1,3,-glucosyltransferase) Gene [Source:MGI Symbol;Acc:MGI:2444031]
ENSMUST00000114576	5	14	28309	0.158218	2610030H06Rik	RIKEN cDNA 2610030H06 gene Gene [Source:MGI Symbol;Acc:MGI:1914298]
ENSMUST00000069304	4	9	28309	0.158218	Hnrnph1	heterogeneous nuclear ribonucleoprotein H1 Gene [Source:MGI Symbol;Acc:MGI:1891925]
ENSMUST00000071565	6	19	28309	0.158218	Gm4978	predicted gene 4978 Pseudogene [Source:MGI Symbol;Acc:MGI:3645765]
ENSMUST00000023694	5	14	28309	0.158218	1110004E09Rik	RIKEN cDNA 1110004E09 gene Gene [Source:MGI Symbol;Acc:MGI:1915251]
ENSMUST00000105974	5	14	28309	0.158218	Epb4.1	erythrocyte protein band 4.1 Gene [Source:MGI Symbol;Acc:MGI:95401]
ENSMUST00000068242	4	9	28309	0.158218	Rimklb	ribosomal modification protein rimK-like family member B Gene [Source:MGI Symbol;Acc:MGI:1918325]
ENSMUST00000048655	3	5	28309	0.158218	Dusp10	dual specificity phosphatase 10 Gene [Source:MGI Symbol;Acc:MGI:1927070]
ENSMUST00000075326	5	14	28309	0.158218	Fnbp1	formin binding protein 1 Gene [Source:MGI Symbol;Acc:MGI:109606]
ENSMUST00000044608	6	19	28309	0.158218	Jarid2	jumonji, AT rich interactive domain 2 Gene [Source:MGI Symbol;Acc:MGI:104813]
ENSMUST00000029787	4	9	28309	0.158218	Oaz3	ornithine decarboxylase antizyme 3 Gene [Source:MGI Symbol;Acc:MGI:1858170]
ENSMUST00000113950	4	9	28309	0.158218	Kcnip4	Kv channel interacting protein 4 Gene [Source:MGI Symbol;Acc:MGI:1933131]
ENSMUST00000042456	3	5	28309	0.158218	B3galt1	UDP-Gal:betaGlcNAc beta 1,3-galactosyltransferase, polypeptide 1 Gene [Source:MGI Symbol;Acc:MGI:1349403]
ENSMUST00000049355	4	9	28309	0.158218	Mapk6	mitogen-activated protein kinase 6 Gene [Source:MGI Symbol;Acc:MGI:1354946]
ENSMUST00000114325	4	9	28309	0.158218	Orc2	origin recognition complex, subunit 2 Gene [Source:MGI Symbol;Acc:MGI:1328306]
ENSMUST00000103133	5	14	28309	0.158218	Smarce1	SWI/SNF related, matrix associated, actin dependent regulator of chromatin, subfamily e, member 1 Gene [Source:MGI Symbol;Acc:MGI:1927347]
ENSMUST00000020501	5	14	28309	0.158218	Sumo3	SMT3 suppressor of mif two 3 homolog 3 (yeast) Gene [Source:MGI Symbol;Acc:MGI:1336201]
ENSMUST00000029451	4	9	28309	0.158218	Tspan2	tetraspanin 2 Gene [Source:MGI Symbol;Acc:MGI:1917997]
ENSMUST00000107922	5	14	28309	0.158218	Ccdc107	coiled-coil domain containing 107 Gene [Source:MGI Symbol;Acc:MGI:1913423]
ENSMUST00000117219	4	9	28309	0.158218	Gm13340	predicted gene 13340 Pseudogene [Source:MGI Symbol;Acc:MGI:3650227]
ENSMUST00000051087	4	9	28309	0.158218	D0H4S114	DNA segment, human D4S114 Gene [Source:MGI Symbol;Acc:MGI:99444]
ENSMUST00000036177	3	5	28309	0.158218	En2	engrailed 2 Gene [Source:MGI Symbol;Acc:MGI:95390]
ENSMUST00000120360	5	14	28309	0.158218	Rpl10a-ps1	ribosomal protein L10A, pseudogene 1 Pseudogene [Source:MGI Symbol;Acc:MGI:3705885]
ENSMUST00000089558	4	9	28309	0.158218	Snrpg	small nuclear ribonucleoprotein polypeptide G Gene [Source:MGI Symbol;Acc:MGI:1915261]
ENSMUST00000045622	4	9	28309	0.158218	NA	NA
ENSMUST00000112978	4	9	28309	0.158218	Psmd10	proteasome (prosome, macropain) 26S subunit, non-ATPase, 10 Gene [Source:MGI Symbol;Acc:MGI:1858898]
ENSMUST00000001162	6	19	28309	0.158218	Uxt	ubiquitously expressed transcript Gene [Source:MGI Symbol;Acc:MGI:1277988]
ENSMUST00000107210	6	19	28309	0.158218	Sytl2	synaptotagmin-like 2 Gene [Source:MGI Symbol;Acc:MGI:1933366]
ENSMUST00000058383	4	9	28309	0.158218	Paip2b	poly(A) binding protein interacting protein 2B Gene [Source:MGI Symbol;Acc:MGI:2386865]
ENSMUST00000019962	4	9	28309	0.158218	Cd164	CD164 antigen Gene [Source:MGI Symbol;Acc:MGI:1859568]
ENSMUST00000112810	5	14	28309	0.158218	Gtdc1	glycosyltransferase-like domain containing 1 Gene [Source:MGI Symbol;Acc:MGI:2444269]
ENSMUST00000032358	3	5	28309	0.158218	Plekha5	pleckstrin homology domain containing, family A member 5 Gene [Source:MGI Symbol;Acc:MGI:1923802]
ENSMUST00000038705	5	14	28309	0.158218	1810074P20Rik	RIKEN cDNA 1810074P20 gene Gene [Source:MGI Symbol;Acc:MGI:1914740]
ENSMUST00000097377	4	9	28309	0.158218	NA	NA
ENSMUST00000094611	4	9	28309	0.158218	Thap6	THAP domain containing 6 Gene [Source:MGI Symbol;Acc:MGI:1922436]
ENSMUST00000112913	3	5	28309	0.158218	Nxt2	nuclear transport factor 2-like export factor 2 Gene [Source:MGI Symbol;Acc:MGI:2147914]
ENSMUST00000111837	4	9	28309	0.158218	Slco1c1	solute carrier organic anion transporter family, member 1c1 Gene [Source:MGI Symbol;Acc:MGI:1889679]
ENSMUST00000100262	4	9	28309	0.158218	Slc38a1	solute carrier family 38, member 1 Gene [Source:MGI Symbol;Acc:MGI:2145895]
ENSMUST00000107378	3	5	28309	0.158218	NA	NA
ENSMUST00000093842	5	14	28309	0.158218	NA	NA
ENSMUST00000118224	4	9	28309	0.158218	Gm15421	predicted gene 15421 Pseudogene [Source:MGI Symbol;Acc:MGI:3705475]
ENSMUST00000050366	4	9	28309	0.158218	Ift20	intraflagellar transport 20 homolog (Chlamydomonas) Gene [Source:MGI Symbol;Acc:MGI:1915585]
ENSMUST00000112315	3	5	28309	0.158218	Txlng	taxilin gamma Gene [Source:MGI Symbol;Acc:MGI:3590652]
ENSMUST00000023769	3	5	28309	0.158218	Atf1	activating transcription factor 1 Gene [Source:MGI Symbol;Acc:MGI:1298366]
ENSMUST00000076421	4	9	28309	0.158218	C030039L03Rik	RIKEN cDNA C030039L03 gene Gene [Source:MGI Symbol;Acc:MGI:2148237]
ENSMUST00000074038	6	19	28309	0.158218	Acp1	acid phosphatase 1, soluble Gene [Source:MGI Symbol;Acc:MGI:87881]
ENSMUST00000071704	6	19	28309	0.158218	Psma3	proteasome (prosome, macropain) subunit, alpha type 3 Gene [Source:MGI Symbol;Acc:MGI:104883]
ENSMUST00000014546	5	14	28309	0.158218	Tsg101	tumor susceptibility gene 101 Gene [Source:MGI Symbol;Acc:MGI:106581]
ENSMUST00000117490	3	5	28309	0.158218	Gm13504	predicted gene 13504 Pseudogene [Source:MGI Symbol;Acc:MGI:3650156]
ENSMUST00000092678	4	9	28309	0.158218	Bclaf1	BCL2-associated transcription factor 1 Gene [Source:MGI Symbol;Acc:MGI:1917580]
ENSMUST00000112635	4	9	28309	0.158218	Galnt13	UDP-N-acetyl-alpha-D-galactosamine:polypeptide N-acetylgalactosaminyltransferase 13 Gene [Source:MGI Symbol;Acc:MGI:2139447]
ENSMUST00000107003	4	9	28309	0.158218	NA	NA
ENSMUST00000032909	5	14	28309	0.158218	Pde3b	phosphodiesterase 3B, cGMP-inhibited Gene [Source:MGI Symbol;Acc:MGI:1333863]
ENSMUST00000030477	4	9	28309	0.158218	Mobkl2c	MOB1, Mps One Binder kinase activator-like 2C (yeast) Gene [Source:MGI Symbol;Acc:MGI:2140623]
ENSMUST00000118679	3	5	28309	0.158218	Txndc11	thioredoxin domain containing 11 Gene [Source:MGI Symbol;Acc:MGI:1923620]
ENSMUST00000106942	4	9	28309	0.158218	NA	NA
ENSMUST00000100304	6	19	28309	0.158218	Kif21a	kinesin family member 21A Gene [Source:MGI Symbol;Acc:MGI:109188]
ENSMUST00000003115	5	14	28309	0.158218	Cdkn1b	cyclin-dependent kinase inhibitor 1B Gene [Source:MGI Symbol;Acc:MGI:104565]
ENSMUST00000093239	7	25	28309	0.158218	Mtif2	mitochondrial translational initiation factor 2 Gene [Source:MGI Symbol;Acc:MGI:1924034]
ENSMUST00000108335	3	5	28309	0.158218	Asph	aspartate-beta-hydroxylase Gene [Source:MGI Symbol;Acc:MGI:1914186]
ENSMUST00000055878	3	5	28309	0.158218	Gm5548	predicted pseudogene 5548 Pseudogene [Source:MGI Symbol;Acc:MGI:3644344]
ENSMUST00000031059	4	9	28309	0.158218	Ppargc1a	peroxisome proliferative activated receptor, gamma, coactivator 1 alpha Gene [Source:MGI Symbol;Acc:MGI:1342774]
ENSMUST00000097455	4	9	28309	0.158218	Sccpdh	saccharopine dehydrogenase (putative) Gene [Source:MGI Symbol;Acc:MGI:1924486]
ENSMUST00000093923	4	9	28309	0.158218	Cdc27	cell division cycle 27 homolog (S. cerevisiae) Gene [Source:MGI Symbol;Acc:MGI:102685]
ENSMUST00000053251	5	14	28309	0.158218	Rbpms	RNA binding protein gene with multiple splicing Gene [Source:MGI Symbol;Acc:MGI:1334446]
ENSMUST00000111812	4	9	28309	0.158218	Rgs8	regulator of G-protein signaling 8 Gene [Source:MGI Symbol;Acc:MGI:108408]
ENSMUST00000023489	5	14	28309	0.158218	Fyttd1	forty-two-three domain containing 1 Gene [Source:MGI Symbol;Acc:MGI:1917955]
ENSMUST00000114537	4	9	28309	0.158218	Myo1b	myosin IB Gene [Source:MGI Symbol;Acc:MGI:107752]
ENSMUST00000116087	3	5	28309	0.158218	NA	NA
ENSMUST00000106530	4	9	28309	0.158218	Nt5c	5',3'-nucleotidase, cytosolic Gene [Source:MGI Symbol;Acc:MGI:1354954]
ENSMUST00000029654	4	9	28309	0.158218	Glrb	glycine receptor, beta subunit Gene [Source:MGI Symbol;Acc:MGI:95751]
ENSMUST00000032446	5	14	28309	0.158218	Ergic2	ERGIC and golgi 2 Gene [Source:MGI Symbol;Acc:MGI:1914706]
ENSMUST00000101423	7	25	28309	0.158218	Mtif2	mitochondrial translational initiation factor 2 Gene [Source:MGI Symbol;Acc:MGI:1924034]
ENSMUST00000082319	3	5	28309	0.158218	Wdr33	WD repeat domain 33 Gene [Source:MGI Symbol;Acc:MGI:1921570]
ENSMUST00000106723	4	9	28309	0.158218	Slc16a4	solute carrier family 16 (monocarboxylic acid transporters), member 4 Gene [Source:MGI Symbol;Acc:MGI:2385183]
ENSMUST00000031978	5	14	28309	0.158218	Mrps33	mitochondrial ribosomal protein S33 Gene [Source:MGI Symbol;Acc:MGI:1338046]
ENSMUST00000118543	6	19	28309	0.158218	Rpl9	ribosomal protein L9 Gene [Source:MGI Symbol;Acc:MGI:1298373]
ENSMUST00000025394	4	9	28309	0.158218	Sec11c	SEC11 homolog C (S. cerevisiae) Gene [Source:MGI Symbol;Acc:MGI:1913536]
ENSMUST00000022070	5	14	28309	0.158218	Erap1	endoplasmic reticulum aminopeptidase 1 Gene [Source:MGI Symbol;Acc:MGI:1933403]
ENSMUST00000110461	4	9	28309	0.158218	Hif1a	hypoxia inducible factor 1, alpha subunit Gene [Source:MGI Symbol;Acc:MGI:106918]
ENSMUST00000111109	3	5	28309	0.158218	NA	NA
ENSMUST00000031101	5	14	28309	0.158218	Lias	lipoic acid synthetase Gene [Source:MGI Symbol;Acc:MGI:1934604]
ENSMUST00000108163	4	9	28309	0.158218	NA	NA
ENSMUST00000102740	4	9	28309	0.158218	Btf3l4	basic transcription factor 3-like 4 Gene [Source:MGI Symbol;Acc:MGI:1915312]
ENSMUST00000101531	4	9	28309	0.158218	Mcf2	mcf.2 transforming sequence Gene [Source:MGI Symbol;Acc:MGI:96932]
ENSMUST00000008999	11	51	28309	0.158218	Hdac5	histone deacetylase 5 Gene [Source:MGI Symbol;Acc:MGI:1333784]
ENSMUST00000058578	4	9	28309	0.158218	Pgrmc2	progesterone receptor membrane component 2 Gene [Source:MGI Symbol;Acc:MGI:1918054]
ENSMUST00000035024	5	14	28309	0.158218	Slc25a36	solute carrier family 25, member 36 Gene [Source:MGI Symbol;Acc:MGI:1924909]
ENSMUST00000016678	4	9	28309	0.158218	Lamp2	lysosomal-associated membrane protein 2 Gene [Source:MGI Symbol;Acc:MGI:96748]
ENSMUST00000039742	5	14	28309	0.158218	Agphd1	aminoglycoside phosphotransferase domain containing 1 Gene [Source:MGI Symbol;Acc:MGI:2443139]
ENSMUST00000020637	8	31	28309	0.158218	Canx	calnexin Gene [Source:MGI Symbol;Acc:MGI:88261]
ENSMUST00000029858	3	5	28309	0.158218	Asph	aspartate-beta-hydroxylase Gene [Source:MGI Symbol;Acc:MGI:1914186]
ENSMUST00000112089	10	44	28309	0.158218	NA	NA
ENSMUST00000122284	4	9	28309	0.158218	Dyrk1a	dual-specificity tyrosine-(Y)-phosphorylation regulated kinase 1a Gene [Source:MGI Symbol;Acc:MGI:1330299]
ENSMUST00000111467	5	14	28309	0.158218	Mtch2	mitochondrial carrier homolog 2 (C. elegans) Gene [Source:MGI Symbol;Acc:MGI:1929260]
ENSMUST00000027309	4	9	28309	0.158218	Dst	dystonin Gene [Source:MGI Symbol;Acc:MGI:104627]
ENSMUST00000114370	3	5	28309	0.158218	Zfyve28	zinc finger, FYVE domain containing 28 Gene [Source:MGI Symbol;Acc:MGI:2684992]
ENSMUST00000047835	4	9	28309	0.158218	Srsf2ip	serine/arginine-rich splicing factor 2, interacting protein Gene [Source:MGI Symbol;Acc:MGI:1919443]
ENSMUST00000114323	5	14	28309	0.158218	Kbtbd2	kelch repeat and BTB (POZ) domain containing 2 Gene [Source:MGI Symbol;Acc:MGI:2384811]
ENSMUST00000115869	4	9	28309	0.158218	Mpp7	membrane protein, palmitoylated 7 (MAGUK p55 subfamily member 7) Gene [Source:MGI Symbol;Acc:MGI:1922989]
ENSMUST00000098066	7	25	28309	0.158218	AF064781	cDNA sequence AF064781 Gene [Source:MGI Symbol;Acc:MGI:3845895]
ENSMUST00000115441	4	9	28309	0.158218	Gtpbp10	GTP-binding protein 10 (putative) Gene [Source:MGI Symbol;Acc:MGI:2385599]
ENSMUST00000109831	4	9	28309	0.158218	Clgn	calmegin Gene [Source:MGI Symbol;Acc:MGI:107472]
ENSMUST00000022355	5	14	28309	0.158218	Ppp3cb	protein phosphatase 3, catalytic subunit, beta isoform Gene [Source:MGI Symbol;Acc:MGI:107163]
ENSMUST00000115570	3	5	28309	0.158218	NA	NA
ENSMUST00000022148	6	19	28309	0.158218	Mccc2	methylcrotonoyl-Coenzyme A carboxylase 2 (beta) Gene [Source:MGI Symbol;Acc:MGI:1925288]
ENSMUST00000111110	3	5	28309	0.158218	Eif3m	eukaryotic translation initiation factor 3, subunit M Gene [Source:MGI Symbol;Acc:MGI:1351744]
ENSMUST00000107714	3	5	28309	0.158218	Gngt2	guanine nucleotide binding protein (G protein), gamma transducing activity polypeptide 2 Gene [Source:MGI Symbol;Acc:MGI:893584]
ENSMUST00000097723	3	5	28309	0.158218	Cflar	CASP8 and FADD-like apoptosis regulator Gene [Source:MGI Symbol;Acc:MGI:1336166]
ENSMUST00000079881	4	9	28309	0.158218	Zfp398	zinc finger protein 398 Gene [Source:MGI Symbol;Acc:MGI:1917856]
ENSMUST00000113320	4	9	28309	0.158218	Diap2	diaphanous homolog 2 (Drosophila) Gene [Source:MGI Symbol;Acc:MGI:1858500]
ENSMUST00000000201	5	14	28309	0.158218	Nalcn	sodium leak channel, non-selective Gene [Source:MGI Symbol;Acc:MGI:2444306]
ENSMUST00000073060	4	9	28309	0.158218	NA	NA
ENSMUST00000026704	5	14	28309	0.158218	Cct8	chaperonin containing Tcp1, subunit 8 (theta) Gene [Source:MGI Symbol;Acc:MGI:107183]
ENSMUST00000022450	4	9	28309	0.158218	D14Abb1e	DNA segment, Chr 14, Abbott 1 expressed Gene [Source:MGI Symbol;Acc:MGI:1921694]
ENSMUST00000118854	3	5	28309	0.158218	Ndufs6	NADH dehydrogenase (ubiquinone) Fe-S protein 6 Gene [Source:MGI Symbol;Acc:MGI:107932]
ENSMUST00000042576	3	5	28309	0.158218	1110032A03Rik	RIKEN cDNA 1110032A03 gene Gene [Source:MGI Symbol;Acc:MGI:1915971]
ENSMUST00000121899	3	5	28309	0.158218	Gm14830	predicted gene 14830 Pseudogene [Source:MGI Symbol;Acc:MGI:3705386]
ENSMUST00000028592	3	5	28309	0.158218	Eif3m	eukaryotic translation initiation factor 3, subunit M Gene [Source:MGI Symbol;Acc:MGI:1351744]
ENSMUST00000063524	5	14	28309	0.158218	5031410I06Rik	RIKEN cDNA 5031410I06 gene Gene [Source:MGI Symbol;Acc:MGI:3036277]
ENSMUST00000105265	5	14	28309	0.158218	Cnot2	CCR4-NOT transcription complex, subunit 2 Gene [Source:MGI Symbol;Acc:MGI:1919318]
ENSMUST00000027121	4	9	28309	0.158218	Rftn2	raftlin family member 2 Gene [Source:MGI Symbol;Acc:MGI:1921263]
ENSMUST00000035038	4	9	28309	0.158218	Faim	Fas apoptotic inhibitory molecule Gene [Source:MGI Symbol;Acc:MGI:1344387]
ENSMUST00000088811	4	9	28309	0.158218	Zfp160	zinc finger protein 160 Gene [Source:MGI Symbol;Acc:MGI:108187]
ENSMUST00000070039	4	9	28309	0.158218	Fez2	fasciculation and elongation protein zeta 2 (zygin II) Gene [Source:MGI Symbol;Acc:MGI:2675856]
ENSMUST00000024882	5	14	28309	0.158218	Ttc27	tetratricopeptide repeat domain 27 Gene [Source:MGI Symbol;Acc:MGI:1921446]
ENSMUST00000057625	3	5	28309	0.158218	6530401D17Rik	RIKEN cDNA 6530401D17 gene Gene [Source:MGI Symbol;Acc:MGI:1923469]
ENSMUST00000108112	5	14	28309	0.158218	Spata5	spermatogenesis associated 5 Gene [Source:MGI Symbol;Acc:MGI:1927170]
ENSMUST00000110053	4	9	28309	0.158218	Use1	unconventional SNARE in the ER 1 homolog (S. cerevisiae) Gene [Source:MGI Symbol;Acc:MGI:1914273]
ENSMUST00000033275	4	9	28309	0.158218	4930404H21Rik	RIKEN cDNA 4930404H21 gene Gene [Source:MGI Symbol;Acc:MGI:1921058]
ENSMUST00000047616	5	14	28309	0.158218	Jmjd6	jumonji domain containing 6 Gene [Source:MGI Symbol;Acc:MGI:1858910]
ENSMUST00000089252	4	9	28309	0.158218	NA	NA
ENSMUST00000064568	6	19	28309	0.158218	NA	NA
ENSMUST00000076710	3	5	28309	0.158218	Gm7665	predicted pseudogene 7665 Pseudogene [Source:MGI Symbol;Acc:MGI:3645651]
ENSMUST00000088452	5	14	28309	0.158218	Slc38a1	solute carrier family 38, member 1 Gene [Source:MGI Symbol;Acc:MGI:2145895]
ENSMUST00000063508	5	14	28309	0.158218	Gria4	glutamate receptor, ionotropic, AMPA4 (alpha 4) Gene [Source:MGI Symbol;Acc:MGI:95811]
ENSMUST00000071892	5	14	28309	0.158218	NA	NA
ENSMUST00000085546	9	38	28309	0.163335	Hmgb1	high mobility group box 1 Gene [Source:MGI Symbol;Acc:MGI:96113]
ENSMUST00000057972	8	32	28309	0.177774	Vps13c	vacuolar protein sorting 13C (yeast) Gene [Source:MGI Symbol;Acc:MGI:2444207]
ENSMUST00000052239	8	32	28309	0.177774	Pbrm1	polybromo 1 Gene [Source:MGI Symbol;Acc:MGI:1923998]
ENSMUST00000120127	6	20	28309	0.181019	Amd-ps1	S-adenosylmethionine decarboxylase, pseudogene 1 Pseudogene [Source:MGI Symbol;Acc:MGI:1310005]
ENSMUST00000003572	6	20	28309	0.181019	Gars	glycyl-tRNA synthetase Gene [Source:MGI Symbol;Acc:MGI:2449057]
ENSMUST00000020858	6	20	28309	0.181019	Stxbp4	syntaxin binding protein 4 Gene [Source:MGI Symbol;Acc:MGI:1342296]
ENSMUST00000050631	6	20	28309	0.181019	Cyb5r4	cytochrome b5 reductase 4 Gene [Source:MGI Symbol;Acc:MGI:2386848]
ENSMUST00000110894	6	20	28309	0.181019	Tpt1	tumor protein, translationally-controlled 1 Gene [Source:MGI Symbol;Acc:MGI:104890]
ENSMUST00000100299	6	20	28309	0.181019	Dock9	dedicator of cytokinesis 9 Gene [Source:MGI Symbol;Acc:MGI:106321]
ENSMUST00000035014	6	20	28309	0.181019	Tgfbr2	transforming growth factor, beta receptor II Gene [Source:MGI Symbol;Acc:MGI:98729]
ENSMUST00000005504	6	20	28309	0.181019	Fbxo11	F-box protein 11 Gene [Source:MGI Symbol;Acc:MGI:2147134]
ENSMUST00000100949	6	20	28309	0.181019	Glmn	glomulin, FKBP associated protein Gene [Source:MGI Symbol;Acc:MGI:2141180]
ENSMUST00000055946	6	20	28309	0.181019	Gpr158	G protein-coupled receptor 158 Gene [Source:MGI Symbol;Acc:MGI:2441697]
ENSMUST00000113264	6	20	28309	0.181019	Cntn4	contactin 4 Gene [Source:MGI Symbol;Acc:MGI:1095737]
ENSMUST00000118392	6	20	28309	0.181019	Amd-ps4	S-adenosylmethionine decarboxylase, pseudogene 4 Pseudogene [Source:MGI Symbol;Acc:MGI:3650439]
ENSMUST00000020749	7	26	28309	0.183979	Mtif2	mitochondrial translational initiation factor 2 Gene [Source:MGI Symbol;Acc:MGI:1924034]
ENSMUST00000106588	7	26	28309	0.183979	Rps15a	ribosomal protein S15A Gene [Source:MGI Symbol;Acc:MGI:2389091]
ENSMUST00000082223	7	26	28309	0.183979	Rpl5	ribosomal protein L5 Gene [Source:MGI Symbol;Acc:MGI:102854]
ENSMUST00000094522	2	2	28309	0.18824	Gm13103	predicted gene 13103 Gene [Source:MGI Symbol;Acc:MGI:3650203]
ENSMUST00000120155	2	2	28309	0.18824	Gm13320	predicted gene 13320 Pseudogene [Source:MGI Symbol;Acc:MGI:3649935]
ENSMUST00000121214	2	2	28309	0.18824	Gm12140	predicted gene 12140 Pseudogene [Source:MGI Symbol;Acc:MGI:3652290]
ENSMUST00000092845	2	2	28309	0.18824	NA	NA
ENSMUST00000119064	2	2	28309	0.18824	Gm7658	predicted gene 7658 Pseudogene [Source:MGI Symbol;Acc:MGI:3648029]
ENSMUST00000019917	2	2	28309	0.18824	Rwdd1	RWD domain containing 1 Gene [Source:MGI Symbol;Acc:MGI:1913771]
ENSMUST00000121165	2	2	28309	0.18824	Gm14506	predicted gene 14506 Pseudogene [Source:MGI Symbol;Acc:MGI:3705552]
ENSMUST00000040924	2	2	28309	0.18824	Ss18	synovial sarcoma translocation, Chromosome 18 Gene [Source:MGI Symbol;Acc:MGI:107708]
ENSMUST00000101041	2	2	28309	0.18824	NA	NA
ENSMUST00000107436	2	2	28309	0.18824	Gm11559	predicted gene 11559 Gene [Source:MGI Symbol;Acc:MGI:3652067]
ENSMUST00000074865	2	2	28309	0.18824	NA	NA
ENSMUST00000057427	2	2	28309	0.18824	Ipo11	importin 11 Gene [Source:MGI Symbol;Acc:MGI:2442377]
ENSMUST00000053770	2	2	28309	0.18824	Dtna	dystrobrevin alpha Gene [Source:MGI Symbol;Acc:MGI:106039]
ENSMUST00000100384	2	2	28309	0.18824	NA	NA
ENSMUST00000119097	2	2	28309	0.18824	Gm13418	predicted gene 13418 Pseudogene [Source:MGI Symbol;Acc:MGI:3650378]
ENSMUST00000121356	2	2	28309	0.18824	Gm6079	predicted gene 6079 Pseudogene [Source:MGI Symbol;Acc:MGI:3645681]
ENSMUST00000105768	2	2	28309	0.18824	Gm13103	predicted gene 13103 Gene [Source:MGI Symbol;Acc:MGI:3650203]
ENSMUST00000087467	2	2	28309	0.18824	Homer3	homer homolog 3 (Drosophila) Gene [Source:MGI Symbol;Acc:MGI:1347359]
ENSMUST00000050585	2	2	28309	0.18824	Olfr522	olfactory receptor 522 Gene [Source:MGI Symbol;Acc:MGI:3030356]
ENSMUST00000028377	20	121	28309	0.190616	Scn2a1	sodium channel, voltage-gated, type II, alpha 1 Gene [Source:MGI Symbol;Acc:MGI:98248]
ENSMUST00000024984	4	10	28309	0.196202	Tmem204	transmembrane protein 204 Gene [Source:MGI Symbol;Acc:MGI:3039635]
ENSMUST00000029481	4	10	28309	0.196202	Stxbp3a	syntaxin binding protein 3A Gene [Source:MGI Symbol;Acc:MGI:107362]
ENSMUST00000054213	5	15	28309	0.196202	Timm8a1	translocase of inner mitochondrial membrane 8 homolog a1 (yeast) Gene [Source:MGI Symbol;Acc:MGI:1353433]
ENSMUST00000084949	5	15	28309	0.196202	Impad1	inositol monophosphatase domain containing 1 Gene [Source:MGI Symbol;Acc:MGI:1915720]
ENSMUST00000005503	5	15	28309	0.196202	Msh6	mutS homolog 6 (E. coli) Gene [Source:MGI Symbol;Acc:MGI:1343961]
ENSMUST00000075245	13	68	28309	0.196202	Unc13c	unc-13 homolog C (C. elegans) Gene [Source:MGI Symbol;Acc:MGI:2149021]
ENSMUST00000084725	5	15	28309	0.196202	D330041H03Rik	RIKEN cDNA D330041H03 gene Gene [Source:MGI Symbol;Acc:MGI:3603827]
ENSMUST00000067272	4	10	28309	0.196202	Eapp	E2F-associated phosphoprotein Gene [Source:MGI Symbol;Acc:MGI:1913516]
ENSMUST00000107574	4	10	28309	0.196202	Lpar1	lysophosphatidic acid receptor 1 Gene [Source:MGI Symbol;Acc:MGI:108429]
ENSMUST00000114294	5	15	28309	0.196202	Abcg2	ATP-binding cassette, sub-family G (WHITE), member 2 Gene [Source:MGI Symbol;Acc:MGI:1347061]
ENSMUST00000108531	4	10	28309	0.196202	Nup88	nucleoporin 88 Gene [Source:MGI Symbol;Acc:MGI:104900]
ENSMUST00000106769	4	10	28309	0.196202	St7l	suppression of tumorigenicity 7-like Gene [Source:MGI Symbol;Acc:MGI:2386964]
ENSMUST00000034414	5	15	28309	0.196202	4931406C07Rik	RIKEN cDNA 4931406C07 gene Gene [Source:MGI Symbol;Acc:MGI:1918234]
ENSMUST00000051504	4	10	28309	0.196202	Ecm2	extracellular matrix protein 2, female organ and adipocyte specific Gene [Source:MGI Symbol;Acc:MGI:3039578]
ENSMUST00000096119	4	10	28309	0.196202	Asah2	N-acylsphingosine amidohydrolase 2 Gene [Source:MGI Symbol;Acc:MGI:1859310]
ENSMUST00000047868	4	10	28309	0.196202	NA	NA
ENSMUST00000021913	5	15	28309	0.196202	Auh	AU RNA binding protein/enoyl-coenzyme A hydratase Gene [Source:MGI Symbol;Acc:MGI:1338011]
ENSMUST00000023570	4	10	28309	0.196202	Btg3	B-cell translocation gene 3 Gene [Source:MGI Symbol;Acc:MGI:109532]
ENSMUST00000099538	4	10	28309	0.196202	Sumo3	SMT3 suppressor of mif two 3 homolog 3 (yeast) Gene [Source:MGI Symbol;Acc:MGI:1336201]
ENSMUST00000030290	5	15	28309	0.196202	Inadl	InaD-like (Drosophila) Gene [Source:MGI Symbol;Acc:MGI:1277960]
ENSMUST00000081790	4	10	28309	0.196202	2700078E11Rik	RIKEN cDNA 2700078E11 gene Gene [Source:MGI Symbol;Acc:MGI:1926082]
ENSMUST00000116601	4	10	28309	0.196202	NA	NA
ENSMUST00000045897	5	15	28309	0.196202	Ptma	prothymosin alpha Gene [Source:MGI Symbol;Acc:MGI:97803]
ENSMUST00000096351	4	10	28309	0.196202	NA	NA
ENSMUST00000026013	5	15	28309	0.196202	Maoa	monoamine oxidase A Gene [Source:MGI Symbol;Acc:MGI:96915]
ENSMUST00000081752	4	10	28309	0.196202	Olfm3	olfactomedin 3 Gene [Source:MGI Symbol;Acc:MGI:2387329]
ENSMUST00000061506	4	10	28309	0.196202	Tmtc2	transmembrane and tetratricopeptide repeat containing 2 Gene [Source:MGI Symbol;Acc:MGI:1914057]
ENSMUST00000060766	4	10	28309	0.196202	Cltc	clathrin, heavy polypeptide (Hc) Gene [Source:MGI Symbol;Acc:MGI:2388633]
ENSMUST00000073879	4	10	28309	0.196202	Fnbp1	formin binding protein 1 Gene [Source:MGI Symbol;Acc:MGI:109606]
ENSMUST00000069399	4	10	28309	0.196202	Kbtbd11	kelch repeat and BTB (POZ) domain containing 11 Gene [Source:MGI Symbol;Acc:MGI:1922151]
ENSMUST00000110968	4	10	28309	0.196202	Gfra2	glial cell line derived neurotrophic factor family receptor alpha 2 Gene [Source:MGI Symbol;Acc:MGI:1195462]
ENSMUST00000066747	4	10	28309	0.196202	Cd8a	CD8 antigen, alpha chain Gene [Source:MGI Symbol;Acc:MGI:88346]
ENSMUST00000100848	4	10	28309	0.196202	Gm10401	predicted gene 10401 Gene [Source:MGI Symbol;Acc:MGI:3704254]
ENSMUST00000112805	4	10	28309	0.196202	NA	NA
ENSMUST00000000579	4	10	28309	0.196202	Sox9	SRY-box containing gene 9 Gene [Source:MGI Symbol;Acc:MGI:98371]
ENSMUST00000004614	4	10	28309	0.196202	Zfp110	zinc finger protein 110 Gene [Source:MGI Symbol;Acc:MGI:1890378]
ENSMUST00000034787	5	15	28309	0.196202	Phip	pleckstrin homology domain interacting protein Gene [Source:MGI Symbol;Acc:MGI:1932404]
ENSMUST00000075293	4	10	28309	0.196202	Gm5558	predicted gene 5558 Pseudogene [Source:MGI Symbol;Acc:MGI:3644616]
ENSMUST00000092778	4	10	28309	0.196202	Spag9	sperm associated antigen 9 Gene [Source:MGI Symbol;Acc:MGI:1918084]
ENSMUST00000032307	4	10	28309	0.196202	Magohb	mago-nashi homolog B (Drosophila) Gene [Source:MGI Symbol;Acc:MGI:1913691]
ENSMUST00000041956	4	10	28309	0.196202	Spag9	sperm associated antigen 9 Gene [Source:MGI Symbol;Acc:MGI:1918084]
ENSMUST00000099760	4	10	28309	0.196202	NA	NA
ENSMUST00000037005	4	10	28309	0.196202	Slc9a10	solute carrier family 9, member 10 Gene [Source:MGI Symbol;Acc:MGI:2685456]
ENSMUST00000062380	4	10	28309	0.196202	Olfr186	olfactory receptor 186 Gene [Source:MGI Symbol;Acc:MGI:3030020]
ENSMUST00000031859	5	15	28309	0.196202	Trim24	tripartite motif-containing 24 Gene [Source:MGI Symbol;Acc:MGI:109275]
ENSMUST00000114775	4	10	28309	0.196202	Stxbp5l	syntaxin binding protein 5-like Gene [Source:MGI Symbol;Acc:MGI:2443815]
ENSMUST00000068247	4	10	28309	0.196202	NA	NA
ENSMUST00000023754	4	10	28309	0.196202	Aqp6	aquaporin 6 Gene [Source:MGI Symbol;Acc:MGI:1341204]
ENSMUST00000120714	4	10	28309	0.196202	Pdcd5	programmed cell death 5 Gene [Source:MGI Symbol;Acc:MGI:1913538]
ENSMUST00000101347	5	15	28309	0.196202	Mat2b	methionine adenosyltransferase II, beta Gene [Source:MGI Symbol;Acc:MGI:1913667]
ENSMUST00000070021	4	10	28309	0.196202	Gm9990	predicted gene 9990 Gene [Source:MGI Symbol;Acc:MGI:3642272]
ENSMUST00000113769	4	10	28309	0.196202	Arr3	arrestin 3, retinal Gene [Source:MGI Symbol;Acc:MGI:2159617]
ENSMUST00000009693	4	10	28309	0.196202	Srp14	signal recognition particle 14 Gene [Source:MGI Symbol;Acc:MGI:107169]
ENSMUST00000023605	4	10	28309	0.196202	Masp1	mannan-binding lectin serine peptidase 1 Gene [Source:MGI Symbol;Acc:MGI:88492]
ENSMUST00000029423	4	10	28309	0.196202	Serpini1	serine (or cysteine) peptidase inhibitor, clade I, member 1 Gene [Source:MGI Symbol;Acc:MGI:1194506]
ENSMUST00000068783	4	10	28309	0.196202	Gm9881	predicted gene 9881 Gene [Source:MGI Symbol;Acc:MGI:3641832]
ENSMUST00000060148	5	15	28309	0.196202	Hivep1	human immunodeficiency virus type I enhancer binding protein 1 Gene [Source:MGI Symbol;Acc:MGI:96100]
ENSMUST00000075132	4	10	28309	0.196202	Cdh12	cadherin 12 Gene [Source:MGI Symbol;Acc:MGI:109503]
ENSMUST00000091589	5	15	28309	0.196202	Ddx46	DEAD (Asp-Glu-Ala-Asp) box polypeptide 46 Gene [Source:MGI Symbol;Acc:MGI:1920895]
ENSMUST00000070353	4	10	28309	0.196202	Slc24a5	solute carrier family 24, member 5 Gene [Source:MGI Symbol;Acc:MGI:2677271]
ENSMUST00000050757	4	10	28309	0.196202	Ptprd	protein tyrosine phosphatase, receptor type, D Gene [Source:MGI Symbol;Acc:MGI:97812]
ENSMUST00000108275	4	10	28309	0.196202	Ift20	intraflagellar transport 20 homolog (Chlamydomonas) Gene [Source:MGI Symbol;Acc:MGI:1915585]
ENSMUST00000109230	4	10	28309	0.196202	Srsf2ip	serine/arginine-rich splicing factor 2, interacting protein Gene [Source:MGI Symbol;Acc:MGI:1919443]
ENSMUST00000116635	5	15	28309	0.196202	Aldh7a1	aldehyde dehydrogenase family 7, member A1 Gene [Source:MGI Symbol;Acc:MGI:108186]
ENSMUST00000080856	4	10	28309	0.196202	Ipo11	importin 11 Gene [Source:MGI Symbol;Acc:MGI:2442377]
ENSMUST00000098064	4	10	28309	0.196202	Akap2	A kinase (PRKA) anchor protein 2 Gene [Source:MGI Symbol;Acc:MGI:1306795]
ENSMUST00000078385	5	15	28309	0.196202	AL669967.1
ENSMUST00000045844	5	15	28309	0.196202	Med16	mediator complex subunit 16 Gene [Source:MGI Symbol;Acc:MGI:2158394]
ENSMUST00000113933	4	10	28309	0.196202	Pcyt1b	phosphate cytidylyltransferase 1, choline, beta isoform Gene [Source:MGI Symbol;Acc:MGI:2147987]
ENSMUST00000115115	4	10	28309	0.196202	Mcts1	malignant T cell amplified sequence 1 Gene [Source:MGI Symbol;Acc:MGI:1916245]
ENSMUST00000112020	4	10	28309	0.196202	Klra10	killer cell lectin-like receptor subfamily A, member 10 Gene [Source:MGI Symbol;Acc:MGI:1321093]
ENSMUST00000033730	4	10	28309	0.196202	Grpr	gastrin releasing peptide receptor Gene [Source:MGI Symbol;Acc:MGI:95836]
ENSMUST00000029269	5	15	28309	0.196202	Exosc9	exosome component 9 Gene [Source:MGI Symbol;Acc:MGI:1355319]
ENSMUST00000098707	4	10	28309	0.196202	NA	NA
ENSMUST00000106198	4	10	28309	0.196202	NA	NA
ENSMUST00000107557	4	10	28309	0.196202	AI314180	expressed sequence AI314180 Gene [Source:MGI Symbol;Acc:MGI:2140220]
ENSMUST00000053148	4	10	28309	0.196202	St7	suppression of tumorigenicity 7 Gene [Source:MGI Symbol;Acc:MGI:1927450]
ENSMUST00000025073	5	15	28309	0.196202	Cul2	cullin 2 Gene [Source:MGI Symbol;Acc:MGI:1918995]
ENSMUST00000116267	4	10	28309	0.196202	NA	NA
ENSMUST00000074113	4	10	28309	0.196202	Prom1	prominin 1 Gene [Source:MGI Symbol;Acc:MGI:1100886]
ENSMUST00000034051	4	10	28309	0.196202	Ufsp2	UFM1-specific peptidase 2 Gene [Source:MGI Symbol;Acc:MGI:1913679]
ENSMUST00000103145	5	15	28309	0.196202	E2f1	E2F transcription factor 1 Gene [Source:MGI Symbol;Acc:MGI:101941]
ENSMUST00000095012	5	15	28309	0.196202	Sema3a	sema domain, immunoglobulin domain (Ig), short basic domain, secreted, (semaphorin) 3A Gene [Source:MGI Symbol;Acc:MGI:107558]
ENSMUST00000039720	4	10	28309	0.196202	Rragb	Ras-related GTP binding B Gene [Source:MGI Symbol;Acc:MGI:3038613]
ENSMUST00000035813	5	15	28309	0.196202	Ppp1r9a	protein phosphatase 1, regulatory (inhibitor) subunit 9A Gene [Source:MGI Symbol;Acc:MGI:2442401]
ENSMUST00000072671	5	15	28309	0.196202	Nrxn1	neurexin I Gene [Source:MGI Symbol;Acc:MGI:1096391]
ENSMUST00000056256	4	10	28309	0.196202	4933415A04Rik	RIKEN cDNA 4933415A04 gene Gene [Source:MGI Symbol;Acc:MGI:1922977]
ENSMUST00000027020	5	15	28309	0.196202	Gria4	glutamate receptor, ionotropic, AMPA4 (alpha 4) Gene [Source:MGI Symbol;Acc:MGI:95811]
ENSMUST00000023599	4	10	28309	0.196202	Eif4a2	eukaryotic translation initiation factor 4A2 Gene [Source:MGI Symbol;Acc:MGI:106906]
ENSMUST00000063496	4	10	28309	0.196202	Tpd52	tumor protein D52 Gene [Source:MGI Symbol;Acc:MGI:107749]
ENSMUST00000043907	4	10	28309	0.196202	Mrps34	mitochondrial ribosomal protein S34 Gene [Source:MGI Symbol;Acc:MGI:1930188]
ENSMUST00000110691	4	10	28309	0.196202	Akr1e1	aldo-keto reductase family 1, member E1 Gene [Source:MGI Symbol;Acc:MGI:1914758]
ENSMUST00000118766	4	10	28309	0.196202	Gm16198	predicted gene 16198 Pseudogene [Source:MGI Symbol;Acc:MGI:3802052]
ENSMUST00000101438	5	15	28309	0.196202	Smek2	SMEK homolog 2, suppressor of mek1 (Dictyostelium) Gene [Source:MGI Symbol;Acc:MGI:2144474]
ENSMUST00000027285	5	15	28309	0.196202	Unc50	unc-50 homolog (C. elegans) Gene [Source:MGI Symbol;Acc:MGI:1914637]
ENSMUST00000118690	5	15	28309	0.196202	Gm12901	predicted gene 12901 Pseudogene [Source:MGI Symbol;Acc:MGI:3650176]
ENSMUST00000118155	4	10	28309	0.196202	Sumo2	SMT3 suppressor of mif two 3 homolog 2 (yeast) Gene [Source:MGI Symbol;Acc:MGI:2158813]
ENSMUST00000045191	4	10	28309	0.196202	Cald1	caldesmon 1 Gene [Source:MGI Symbol;Acc:MGI:88250]
ENSMUST00000096236	4	10	28309	0.196202	Rpsa-ps12	ribosomal protein SA, pseudogene 12 Pseudogene [Source:MGI Symbol;Acc:MGI:3651234]
ENSMUST00000100663	5	15	28309	0.196202	Cltc	clathrin, heavy polypeptide (Hc) Gene [Source:MGI Symbol;Acc:MGI:2388633]
ENSMUST00000077551	4	10	28309	0.196202	Gm4822	predicted pseudogene 4822 Pseudogene [Source:MGI Symbol;Acc:MGI:3643987]
ENSMUST00000099494	5	15	28309	0.196202	Btaf1	BTAF1 RNA polymerase II, B-TFIID transcription factor-associated, (Mot1 homolog, S. cerevisiae) Gene [Source:MGI Symbol;Acc:MGI:2147538]
ENSMUST00000077033	4	10	28309	0.196202	Macf1	microtubule-actin crosslinking factor 1 Gene [Source:MGI Symbol;Acc:MGI:108559]
ENSMUST00000023526	5	15	28309	0.196202	Stxbp5l	syntaxin binding protein 5-like Gene [Source:MGI Symbol;Acc:MGI:2443815]
ENSMUST00000110105	4	10	28309	0.196202	Zc3h14	zinc finger CCCH type containing 14 Gene [Source:MGI Symbol;Acc:MGI:1919824]
ENSMUST00000048067	4	10	28309	0.196202	Zcchc12	zinc finger, CCHC domain containing 12 Gene [Source:MGI Symbol;Acc:MGI:1919943]
ENSMUST00000121759	5	15	28309	0.196202	Synj1	synaptojanin 1 Gene [Source:MGI Symbol;Acc:MGI:1354961]
ENSMUST00000026599	5	15	28309	0.196202	Apool	apolipoprotein O-like Gene [Source:MGI Symbol;Acc:MGI:1915367]
ENSMUST00000073551	5	15	28309	0.196202	Zfp386	zinc finger protein 386 (Kruppel-like) Gene [Source:MGI Symbol;Acc:MGI:1930708]
ENSMUST00000032342	4	10	28309	0.196202	Mgp	matrix Gla protein Gene [Source:MGI Symbol;Acc:MGI:96976]
ENSMUST00000102696	4	10	28309	0.196202	Rps8	ribosomal protein S8 Gene [Source:MGI Symbol;Acc:MGI:98166]
ENSMUST00000012393	5	15	28309	0.196202	NA	NA
ENSMUST00000112377	4	10	28309	0.196202	Phka2	phosphorylase kinase alpha 2 Gene [Source:MGI Symbol;Acc:MGI:97577]
ENSMUST00000026631	4	10	28309	0.196202	Fgf14	fibroblast growth factor 14 Gene [Source:MGI Symbol;Acc:MGI:109189]
ENSMUST00000028156	4	10	28309	0.196202	Gfi1b	growth factor independent 1B Gene [Source:MGI Symbol;Acc:MGI:1276578]
ENSMUST00000033982	4	10	28309	0.196202	BC019943	cDNA sequence BC019943 Gene [Source:MGI Symbol;Acc:MGI:2384576]
ENSMUST00000023248	4	10	28309	0.196202	Ly6a	lymphocyte antigen 6 complex, locus A Gene [Source:MGI Symbol;Acc:MGI:107527]
ENSMUST00000053558	4	10	28309	0.196202	Ankrd37	ankyrin repeat domain 37 Gene [Source:MGI Symbol;Acc:MGI:3603344]
ENSMUST00000052798	7	27	28309	0.200957	Ptges3	prostaglandin E synthase 3 (cytosolic) Gene [Source:MGI Symbol;Acc:MGI:1929282]
ENSMUST00000023352	7	27	28309	0.200957	Prkdc	protein kinase, DNA activated, catalytic polypeptide Gene [Source:MGI Symbol;Acc:MGI:104779]
ENSMUST00000097786	7	27	28309	0.200957	Dst	dystonin Gene [Source:MGI Symbol;Acc:MGI:104627]
ENSMUST00000090080	6	21	28309	0.204233	Gm10243	predicted gene 10243 Pseudogene [Source:MGI Symbol;Acc:MGI:3704266]
ENSMUST00000026043	6	21	28309	0.204233	Slk	STE20-like kinase (yeast) Gene [Source:MGI Symbol;Acc:MGI:103241]
ENSMUST00000019980	6	21	28309	0.204233	Amd-ps4	S-adenosylmethionine decarboxylase, pseudogene 4 Pseudogene [Source:MGI Symbol;Acc:MGI:3650439]
ENSMUST00000081551	5	16	28309	0.235061	Tcea1	transcription elongation factor A (SII) 1 Gene [Source:MGI Symbol;Acc:MGI:1196624]
ENSMUST00000118578	3	6	28309	0.235061	Otx2	orthodenticle homolog 2 (Drosophila) Gene [Source:MGI Symbol;Acc:MGI:97451]
ENSMUST00000112366	5	16	28309	0.235061	Scn1a	sodium channel, voltage-gated, type I, alpha Gene [Source:MGI Symbol;Acc:MGI:98246]
ENSMUST00000014913	3	6	28309	0.235061	Psmb1	proteasome (prosome, macropain) subunit, beta type 1 Gene [Source:MGI Symbol;Acc:MGI:104884]
ENSMUST00000031984	3	6	28309	0.235061	Smarcad1	SWI/SNF-related, matrix-associated actin-dependent regulator of chromatin, subfamily a, containing DEAD/H box 1` Gene [Source:MGI Symbol;Acc:MGI:95453]
ENSMUST00000110744	5	16	28309	0.235061	NA	NA
ENSMUST00000117881	3	6	28309	0.235061	Gm12774	predicted gene 12774 Pseudogene [Source:MGI Symbol;Acc:MGI:3650283]
ENSMUST00000114227	3	6	28309	0.235061	Gng12	guanine nucleotide binding protein (G protein), gamma 12 Gene [Source:MGI Symbol;Acc:MGI:1336171]
ENSMUST00000040005	3	6	28309	0.235061	Alkbh3	alkB, alkylation repair homolog 3 (E. coli) Gene [Source:MGI Symbol;Acc:MGI:1916363]
ENSMUST00000109111	3	6	28309	0.235061	Clk4	CDC like kinase 4 Gene [Source:MGI Symbol;Acc:MGI:1098551]
ENSMUST00000029877	5	16	28309	0.235061	Decr1	2,4-dienoyl CoA reductase 1, mitochondrial Gene [Source:MGI Symbol;Acc:MGI:1914710]
ENSMUST00000073495	5	16	28309	0.235061	Gm12960	predicted gene 12960 Pseudogene [Source:MGI Symbol;Acc:MGI:3651525]
ENSMUST00000106162	5	16	28309	0.235061	Csf3r	colony stimulating factor 3 receptor (granulocyte) Gene [Source:MGI Symbol;Acc:MGI:1339755]
ENSMUST00000112676	3	6	28309	0.235061	Zfp161	zinc finger protein 161 Gene [Source:MGI Symbol;Acc:MGI:1195345]
ENSMUST00000106956	3	6	28309	0.235061	Myl4	myosin, light polypeptide 4 Gene [Source:MGI Symbol;Acc:MGI:97267]
ENSMUST00000040273	5	16	28309	0.235061	Ttll5	tubulin tyrosine ligase-like family, member 5 Gene [Source:MGI Symbol;Acc:MGI:2443657]
ENSMUST00000093806	5	16	28309	0.235061	Ibtk	inhibitor of Bruton agammaglobulinemia tyrosine kinase Gene [Source:MGI Symbol;Acc:MGI:1918677]
ENSMUST00000047383	3	6	28309	0.235061	Kcne2	potassium voltage-gated channel, Isk-related subfamily, gene 2 Gene [Source:MGI Symbol;Acc:MGI:1891123]
ENSMUST00000121521	3	6	28309	0.235061	G2e3	G2/M-phase specific E3 ubiquitin ligase Gene [Source:MGI Symbol;Acc:MGI:2444298]
ENSMUST00000048706	3	6	28309	0.235061	Orc3	origin recognition complex, subunit 3 Gene [Source:MGI Symbol;Acc:MGI:1354944]
ENSMUST00000106607	3	6	28309	0.235061	1110004F10Rik	RIKEN cDNA 1110004F10 gene Gene [Source:MGI Symbol;Acc:MGI:1929274]
ENSMUST00000042105	3	6	28309	0.235061	Ppp1r15a	protein phosphatase 1, regulatory (inhibitor) subunit 15A Gene [Source:MGI Symbol;Acc:MGI:1927072]
ENSMUST00000069293	5	16	28309	0.235061	Dnahc7c	dynein, axonemal, heavy chain 7C Gene [Source:MGI Symbol;Acc:MGI:3639762]
ENSMUST00000108099	3	6	28309	0.235061	NA	NA
ENSMUST00000020321	3	6	28309	0.235061	Plek	pleckstrin Gene [Source:MGI Symbol;Acc:MGI:1860485]
ENSMUST00000099624	3	6	28309	0.235061	Gm10794	predicted gene 10794 Pseudogene [Source:MGI Symbol;Acc:MGI:3708664]
ENSMUST00000050467	3	6	28309	0.235061	Tob2	transducer of ERBB2, 2 Gene [Source:MGI Symbol;Acc:MGI:1888525]
ENSMUST00000102902	3	6	28309	0.235061	Akap2	A kinase (PRKA) anchor protein 2 Gene [Source:MGI Symbol;Acc:MGI:1306795]
ENSMUST00000033468	5	16	28309	0.235061	Arhgef6	Rac/Cdc42 guanine nucleotide exchange factor (GEF) 6 Gene [Source:MGI Symbol;Acc:MGI:1920591]
ENSMUST00000045296	3	6	28309	0.235061	Siah1a	seven in absentia 1A Gene [Source:MGI Symbol;Acc:MGI:108064]
ENSMUST00000087582	3	6	28309	0.235061	Hnrnpm	heterogeneous nuclear ribonucleoprotein M Gene [Source:MGI Symbol;Acc:MGI:1926465]
ENSMUST00000119982	3	6	28309	0.235061	Gm15007	predicted gene 15007 Pseudogene [Source:MGI Symbol;Acc:MGI:3647930]
ENSMUST00000031866	3	6	28309	0.235061	Mtpn	myotrophin Gene [Source:MGI Symbol;Acc:MGI:99445]
ENSMUST00000071546	3	6	28309	0.235061	Cldn10	claudin 10 Gene [Source:MGI Symbol;Acc:MGI:1913101]
ENSMUST00000070725	5	16	28309	0.235061	Gabrg2	gamma-aminobutyric acid (GABA) A receptor, subunit gamma 2 Gene [Source:MGI Symbol;Acc:MGI:95623]
ENSMUST00000113916	5	16	28309	0.235061	Klhl15	kelch-like 15 (Drosophila) Gene [Source:MGI Symbol;Acc:MGI:1923400]
ENSMUST00000114074	3	6	28309	0.235061	Brcc3	BRCA1/BRCA2-containing complex, subunit 3 Gene [Source:MGI Symbol;Acc:MGI:2389572]
ENSMUST00000022345	3	6	28309	0.235061	Dnajc9	DnaJ (Hsp40) homolog, subfamily C, member 9 Gene [Source:MGI Symbol;Acc:MGI:1915326]
ENSMUST00000026681	3	6	28309	0.235061	1810029B16Rik	RIKEN cDNA 1810029B16 gene Gene [Source:MGI Symbol;Acc:MGI:1913532]
ENSMUST00000077593	3	6	28309	0.235061	NA	NA
ENSMUST00000042734	3	6	28309	0.235061	1700066M21Rik	RIKEN cDNA 1700066M21 gene Gene [Source:MGI Symbol;Acc:MGI:1920717]
ENSMUST00000104987	3	6	28309	0.235061	NA	NA
ENSMUST00000034916	5	16	28309	0.235061	Gm5564	predicted gene 5564 Pseudogene [Source:MGI Symbol;Acc:MGI:3645018]
ENSMUST00000033797	3	6	28309	0.235061	Morf4l2	mortality factor 4 like 2 Gene [Source:MGI Symbol;Acc:MGI:1927167]
ENSMUST00000101519	3	6	28309	0.235061	Luc7l2	LUC7-like 2 (S. cerevisiae) Gene [Source:MGI Symbol;Acc:MGI:2183260]
ENSMUST00000114709	5	16	28309	0.235061	Bivm	basic, immunoglobulin-like variable motif containing Gene [Source:MGI Symbol;Acc:MGI:2179809]
ENSMUST00000111267	3	6	28309	0.235061	Sap18	Sin3-associated polypeptide 18 Gene [Source:MGI Symbol;Acc:MGI:1277978]
ENSMUST00000109292	5	16	28309	0.235061	Gabrg2	gamma-aminobutyric acid (GABA) A receptor, subunit gamma 2 Gene [Source:MGI Symbol;Acc:MGI:95623]
ENSMUST00000107422	3	6	28309	0.235061	Cks1b	CDC28 protein kinase 1b Gene [Source:MGI Symbol;Acc:MGI:1889208]
ENSMUST00000079990	3	6	28309	0.235061	Rimklb	ribosomal modification protein rimK-like family member B Gene [Source:MGI Symbol;Acc:MGI:1918325]
ENSMUST00000109113	3	6	28309	0.235061	Clk4	CDC like kinase 4 Gene [Source:MGI Symbol;Acc:MGI:1098551]
ENSMUST00000106065	3	6	28309	0.235061	Negr1	neuronal growth regulator 1 Gene [Source:MGI Symbol;Acc:MGI:2444846]
ENSMUST00000000087	5	16	28309	0.235061	Scmh1	sex comb on midleg homolog 1 Gene [Source:MGI Symbol;Acc:MGI:1352762]
ENSMUST00000033236	3	6	28309	0.235061	Thumpd1	THUMP domain containing 1 Gene [Source:MGI Symbol;Acc:MGI:2444479]
ENSMUST00000100208	5	16	28309	0.235061	Fnbp1	formin binding protein 1 Gene [Source:MGI Symbol;Acc:MGI:109606]
ENSMUST00000111024	5	16	28309	0.235061	Enah	enabled homolog (Drosophila) Gene [Source:MGI Symbol;Acc:MGI:108360]
ENSMUST00000085735	3	6	28309	0.235061	Pgk1-rs7	phosphoglycerate kinase-1, related sequence-7 Pseudogene [Source:MGI Symbol;Acc:MGI:97562]
ENSMUST00000080813	5	16	28309	0.235061	Rps17	ribosomal protein S17 Gene [Source:MGI Symbol;Acc:MGI:1309526]
ENSMUST00000026693	3	6	28309	0.235061	Zfp202	zinc finger protein 202 Gene [Source:MGI Symbol;Acc:MGI:1933401]
ENSMUST00000037776	5	16	28309	0.235061	Srsf3	serine/arginine-rich splicing factor 3 Gene [Source:MGI Symbol;Acc:MGI:98285]
ENSMUST00000016951	3	6	28309	0.235061	Serpinb1b	serine (or cysteine) peptidase inhibitor, clade B, member 1b Gene [Source:MGI Symbol;Acc:MGI:2445361]
ENSMUST00000065018	3	6	28309	0.235061	NA	NA
ENSMUST00000099820	5	16	28309	0.235061	Lgals8	lectin, galactose binding, soluble 8 Gene [Source:MGI Symbol;Acc:MGI:1928481]
ENSMUST00000065509	5	16	28309	0.235061	Kdm3a	lysine (K)-specific demethylase 3A Gene [Source:MGI Symbol;Acc:MGI:98847]
ENSMUST00000111350	5	16	28309	0.235061	Uap1	UDP-N-acetylglucosamine pyrophosphorylase 1 Gene [Source:MGI Symbol;Acc:MGI:1334459]
ENSMUST00000093792	3	6	28309	0.235061	Tmem22	transmembrane protein 22 Gene [Source:MGI Symbol;Acc:MGI:2685365]
ENSMUST00000054664	5	16	28309	0.235061	Gm6430	predicted gene 6430 Pseudogene [Source:MGI Symbol;Acc:MGI:3648857]
ENSMUST00000022533	5	16	28309	0.235061	Sap18	Sin3-associated polypeptide 18 Gene [Source:MGI Symbol;Acc:MGI:1277978]
ENSMUST00000068551	5	16	28309	0.235061	Xlr4c	X-linked lymphocyte-regulated 4C Gene [Source:MGI Symbol;Acc:MGI:3574099]
ENSMUST00000054059	5	16	28309	0.235061	Nrxn1	neurexin I Gene [Source:MGI Symbol;Acc:MGI:1096391]
ENSMUST00000097506	3	6	28309	0.235061	NA	NA
ENSMUST00000111441	3	6	28309	0.235061	Psmc3	proteasome (prosome, macropain) 26S subunit, ATPase 3 Gene [Source:MGI Symbol;Acc:MGI:1098754]
ENSMUST00000015903	3	6	28309	0.235061	Cnih	cornichon homolog (Drosophila) Gene [Source:MGI Symbol;Acc:MGI:1277202]
ENSMUST00000118362	3	6	28309	0.235061	Txndc11	thioredoxin domain containing 11 Gene [Source:MGI Symbol;Acc:MGI:1923620]
ENSMUST00000114719	3	6	28309	0.235061	Cacnb2	calcium channel, voltage-dependent, beta 2 subunit Gene [Source:MGI Symbol;Acc:MGI:894644]
ENSMUST00000114895	5	16	28309	0.235061	Ccdc11	coiled-coil domain containing 11 Gene [Source:MGI Symbol;Acc:MGI:1921703]
ENSMUST00000069372	3	6	28309	0.235061	E030030I06Rik	RIKEN cDNA E030030I06 gene Gene [Source:MGI Symbol;Acc:MGI:2442914]
ENSMUST00000119315	3	6	28309	0.235061	Gimap6	GTPase, IMAP family member 6 Gene [Source:MGI Symbol;Acc:MGI:1918876]
ENSMUST00000098382	3	6	28309	0.235061	Adamts17	a disintegrin-like and metallopeptidase (reprolysin type) with thrombospondin type 1 motif, 17 Gene [Source:MGI Symbol;Acc:MGI:3588195]
ENSMUST00000031793	3	6	28309	0.235061	Nt5c3	5'-nucleotidase, cytosolic III Gene [Source:MGI Symbol;Acc:MGI:1927186]
ENSMUST00000103014	3	6	28309	0.235061	Fn3k	fructosamine 3 kinase Gene [Source:MGI Symbol;Acc:MGI:1926834]
ENSMUST00000108328	5	16	28309	0.235061	Cp	ceruloplasmin Gene [Source:MGI Symbol;Acc:MGI:88476]
ENSMUST00000117589	5	16	28309	0.235061	Sumo2	SMT3 suppressor of mif two 3 homolog 2 (yeast) Gene [Source:MGI Symbol;Acc:MGI:2158813]
ENSMUST00000090785	5	16	28309	0.235061	Otud7b	OTU domain containing 7B Gene [Source:MGI Symbol;Acc:MGI:2654703]
ENSMUST00000028583	3	6	28309	0.235061	Lin7c	lin-7 homolog C (C. elegans) Gene [Source:MGI Symbol;Acc:MGI:1330839]
ENSMUST00000023502	3	6	28309	0.235061	Snx4	sorting nexin 4 Gene [Source:MGI Symbol;Acc:MGI:1916400]
ENSMUST00000118198	3	6	28309	0.235061	Gtf2a2	general transcription factor II A, 2 Gene [Source:MGI Symbol;Acc:MGI:1933289]
ENSMUST00000061280	3	6	28309	0.235061	Pcmtd1	protein-L-isoaspartate (D-aspartate) O-methyltransferase domain containing 1 Gene [Source:MGI Symbol;Acc:MGI:2441773]
ENSMUST00000036226	5	16	28309	0.235061	Fem1c	fem-1 homolog c (C.elegans) Gene [Source:MGI Symbol;Acc:MGI:2444737]
ENSMUST00000098300	3	6	28309	0.235061	Alg8	asparagine-linked glycosylation 8 homolog (yeast, alpha-1,3-glucosyltransferase) Gene [Source:MGI Symbol;Acc:MGI:2141959]
ENSMUST00000091117	3	6	28309	0.235061	Gm5537	predicted gene 5537 Pseudogene [Source:MGI Symbol;Acc:MGI:3643179]
ENSMUST00000045969	3	6	28309	0.235061	Zfp458	zinc finger protein 458 Gene [Source:MGI Symbol;Acc:MGI:3040691]
ENSMUST00000121321	6	22	28309	0.239276	Gm4167	predicted gene 4167 Pseudogene [Source:MGI Symbol;Acc:MGI:3782343]
ENSMUST00000022899	6	22	28309	0.239276	NA	NA
ENSMUST00000107635	6	22	28309	0.239276	Lrba	LPS-responsive beige-like anchor Gene [Source:MGI Symbol;Acc:MGI:1933162]
ENSMUST00000115075	6	22	28309	0.239276	Rpl35a	ribosomal protein L35A Gene [Source:MGI Symbol;Acc:MGI:1928894]
ENSMUST00000093292	4	11	28309	0.245171	Sertad2	SERTA domain containing 2 Gene [Source:MGI Symbol;Acc:MGI:1931026]
ENSMUST00000052108	4	11	28309	0.245171	NA	NA
ENSMUST00000055821	4	11	28309	0.245171	Spink8	serine peptidase inhibitor, Kazal type 8 Gene [Source:MGI Symbol;Acc:MGI:1925959]
ENSMUST00000108139	4	11	28309	0.245171	NA	NA
ENSMUST00000019517	4	11	28309	0.245171	Cops3	COP9 (constitutive photomorphogenic) homolog, subunit 3 (Arabidopsis thaliana) Gene [Source:MGI Symbol;Acc:MGI:1349409]
ENSMUST00000110837	4	11	28309	0.245171	Chst14	carbohydrate (N-acetylgalactosamine 4-0) sulfotransferase 14 Gene [Source:MGI Symbol;Acc:MGI:1919386]
ENSMUST00000022541	4	11	28309	0.245171	Zdhhc20	zinc finger, DHHC domain containing 20 Gene [Source:MGI Symbol;Acc:MGI:1923215]
ENSMUST00000118059	4	11	28309	0.245171	Unc50	unc-50 homolog (C. elegans) Gene [Source:MGI Symbol;Acc:MGI:1914637]
ENSMUST00000109551	4	11	28309	0.245171	Xpo1	exportin 1, CRM1 homolog (yeast) Gene [Source:MGI Symbol;Acc:MGI:2144013]
ENSMUST00000033591	4	11	28309	0.245171	Itm2a	integral membrane protein 2A Gene [Source:MGI Symbol;Acc:MGI:107706]
ENSMUST00000028220	4	11	28309	0.245171	Fbxw2	F-box and WD-40 domain protein 2 Gene [Source:MGI Symbol;Acc:MGI:1353435]
ENSMUST00000121643	4	11	28309	0.245171	Gm7618	predicted pseudogene 7618 Pseudogene [Source:MGI Symbol;Acc:MGI:3644742]
ENSMUST00000022988	4	11	28309	0.245171	Atad2	ATPase family, AAA domain containing 2 Gene [Source:MGI Symbol;Acc:MGI:1917722]
ENSMUST00000030673	4	11	28309	0.245171	Csf3r	colony stimulating factor 3 receptor (granulocyte) Gene [Source:MGI Symbol;Acc:MGI:1339755]
ENSMUST00000120992	4	11	28309	0.245171	Etfdh	electron transferring flavoprotein, dehydrogenase Gene [Source:MGI Symbol;Acc:MGI:106100]
ENSMUST00000098062	4	11	28309	0.245171	Rbbp6	retinoblastoma binding protein 6 Gene [Source:MGI Symbol;Acc:MGI:894835]
ENSMUST00000028076	4	11	28309	0.245171	Mllt10	myeloid/lymphoid or mixed-lineage leukemia (trithorax homolog, Drosophila); translocated to, 10 Gene [Source:MGI Symbol;Acc:MGI:1329038]
ENSMUST00000106366	4	11	28309	0.245171	Gar1	GAR1 ribonucleoprotein homolog (yeast) Gene [Source:MGI Symbol;Acc:MGI:1930948]
ENSMUST00000044725	4	11	28309	0.245171	Tcta	T-cell leukemia translocation altered gene Gene [Source:MGI Symbol;Acc:MGI:1918829]
ENSMUST00000021719	4	11	28309	0.245171	2010107E04Rik	RIKEN cDNA 2010107E04 gene Gene [Source:MGI Symbol;Acc:MGI:1917507]
ENSMUST00000105693	4	11	28309	0.245171	Nmnat1	nicotinamide nucleotide adenylyltransferase 1 Gene [Source:MGI Symbol;Acc:MGI:1913704]
ENSMUST00000109874	4	11	28309	0.245171	Smad5	MAD homolog 5 (Drosophila) Gene [Source:MGI Symbol;Acc:MGI:1328787]
ENSMUST00000029405	4	11	28309	0.245171	Gmps	guanine monophosphate synthetase Gene [Source:MGI Symbol;Acc:MGI:2448526]
ENSMUST00000082402	4	11	28309	0.245171	mt-Co1	mitochondrially encoded cytochrome c oxidase I Gene [Source:MGI Symbol;Acc:MGI:102504]
ENSMUST00000037299	4	11	28309	0.245171	Ythdf1	YTH domain family 1 Gene [Source:MGI Symbol;Acc:MGI:1917431]
ENSMUST00000073474	4	11	28309	0.245171	NA	NA
ENSMUST00000029944	4	11	28309	0.245171	Ube2j1	ubiquitin-conjugating enzyme E2, J1 Gene [Source:MGI Symbol;Acc:MGI:1926245]
ENSMUST00000072276	4	11	28309	0.245171	Cast	calpastatin Gene [Source:MGI Symbol;Acc:MGI:1098236]
ENSMUST00000115781	4	11	28309	0.245171	Apc	adenomatosis polyposis coli Gene [Source:MGI Symbol;Acc:MGI:88039]
ENSMUST00000062626	4	11	28309	0.245171	Tigd2	tigger transposable element derived 2 Gene [Source:MGI Symbol;Acc:MGI:1915390]
ENSMUST00000051363	4	11	28309	0.245171	Gm5806	predicted gene 5806 Gene [Source:MGI Symbol;Acc:MGI:3645587]
ENSMUST00000113239	4	11	28309	0.245171	Crbn	cereblon Gene [Source:MGI Symbol;Acc:MGI:1913277]
ENSMUST00000072243	4	11	28309	0.245171	Txndc9	thioredoxin domain containing 9 Gene [Source:MGI Symbol;Acc:MGI:2138153]
ENSMUST00000067858	4	11	28309	0.245171	NA	NA
ENSMUST00000031061	4	11	28309	0.245171	Dhx15	DEAH (Asp-Glu-Ala-His) box polypeptide 15 Gene [Source:MGI Symbol;Acc:MGI:1099786]
ENSMUST00000038750	4	11	28309	0.245171	Tas2r108	taste receptor, type 2, member 108 Gene [Source:MGI Symbol;Acc:MGI:2681210]
ENSMUST00000081593	4	11	28309	0.245171	Pgk1	phosphoglycerate kinase 1 Gene [Source:MGI Symbol;Acc:MGI:97555]
ENSMUST00000111232	4	11	28309	0.245171	NA	NA
ENSMUST00000120263	4	11	28309	0.245171	Gm13624	predicted gene 13624 Pseudogene [Source:MGI Symbol;Acc:MGI:3649579]
ENSMUST00000085288	4	11	28309	0.245171	Gm5068	predicted gene 5068 Pseudogene [Source:MGI Symbol;Acc:MGI:3645720]
ENSMUST00000112313	4	11	28309	0.245171	Mdm4	transformed mouse 3T3 cell double minute 4 Gene [Source:MGI Symbol;Acc:MGI:107934]
ENSMUST00000114750	4	11	28309	0.245171	Gsk3b	glycogen synthase kinase 3 beta Gene [Source:MGI Symbol;Acc:MGI:1861437]
ENSMUST00000112603	4	11	28309	0.245171	Dpp10	dipeptidylpeptidase 10 Gene [Source:MGI Symbol;Acc:MGI:2442409]
ENSMUST00000040360	4	11	28309	0.245171	NA	NA
ENSMUST00000051784	4	11	28309	0.245171	Fastkd3	FAST kinase domains 3 Gene [Source:MGI Symbol;Acc:MGI:1916827]
ENSMUST00000112546	4	11	28309	0.245171	NA	NA
ENSMUST00000076623	4	11	28309	0.245171	Arap2	ArfGAP with RhoGAP domain, ankyrin repeat and PH domain 2 Gene [Source:MGI Symbol;Acc:MGI:2684416]
ENSMUST00000118038	4	11	28309	0.245171	Gm7108	predicted gene 7108 Pseudogene [Source:MGI Symbol;Acc:MGI:3645440]
ENSMUST00000049966	4	11	28309	0.245171	Copg	coatomer protein complex, subunit gamma Gene [Source:MGI Symbol;Acc:MGI:1858696]
ENSMUST00000112149	4	11	28309	0.245171	Frmpd4	FERM and PDZ domain containing 4 Gene [Source:MGI Symbol;Acc:MGI:3042378]
ENSMUST00000026925	4	11	28309	0.245171	Sec61a2	Sec61, alpha subunit 2 (S. cerevisiae) Gene [Source:MGI Symbol;Acc:MGI:1931071]
ENSMUST00000107091	8	35	28309	0.245171	Fggy	FGGY carbohydrate kinase domain containing Gene [Source:MGI Symbol;Acc:MGI:1922828]
ENSMUST00000120833	4	11	28309	0.245171	Gm14414	predicted gene 14414 Pseudogene [Source:MGI Symbol;Acc:MGI:3652253]
ENSMUST00000054072	4	11	28309	0.245171	Zfp81	zinc finger protein 81 Gene [Source:MGI Symbol;Acc:MGI:1890752]
ENSMUST00000088454	4	11	28309	0.245171	Slc38a1	solute carrier family 38, member 1 Gene [Source:MGI Symbol;Acc:MGI:2145895]
ENSMUST00000090096	4	11	28309	0.245171	Oxr1	oxidation resistance 1 Gene [Source:MGI Symbol;Acc:MGI:2179326]
ENSMUST00000043356	4	11	28309	0.245171	0610010F05Rik	RIKEN cDNA 0610010F05 gene Gene [Source:MGI Symbol;Acc:MGI:1918925]
ENSMUST00000077080	4	11	28309	0.245171	St7	suppression of tumorigenicity 7 Gene [Source:MGI Symbol;Acc:MGI:1927450]
ENSMUST00000070348	4	11	28309	0.245171	Pak3	p21 protein (Cdc42/Rac)-activated kinase 3 Gene [Source:MGI Symbol;Acc:MGI:1339656]
ENSMUST00000073999	4	11	28309	0.245171	NA	NA
ENSMUST00000110711	4	11	28309	0.245171	Snap23	synaptosomal-associated protein 23 Gene [Source:MGI Symbol;Acc:MGI:109356]
ENSMUST00000100047	4	11	28309	0.245171	NA	NA
ENSMUST00000117449	4	11	28309	0.245171	Jkamp	JNK1/MAPK8-associated membrane protein Gene [Source:MGI Symbol;Acc:MGI:1915057]
ENSMUST00000100058	4	11	28309	0.245171	Vta1	Vps20-associated 1 homolog (S. cerevisiae) Gene [Source:MGI Symbol;Acc:MGI:1913451]
ENSMUST00000025364	4	11	28309	0.245171	Yipf5	Yip1 domain family, member 5 Gene [Source:MGI Symbol;Acc:MGI:1914430]
ENSMUST00000046316	4	11	28309	0.245171	Lrig2	leucine-rich repeats and immunoglobulin-like domains 2 Gene [Source:MGI Symbol;Acc:MGI:2443718]
ENSMUST00000048765	4	11	28309	0.245171	NA	NA
ENSMUST00000116669	4	11	28309	0.245171	Usp14	ubiquitin specific peptidase 14 Gene [Source:MGI Symbol;Acc:MGI:1928898]
ENSMUST00000027810	4	11	28309	0.245171	Fh1	fumarate hydratase 1 Gene [Source:MGI Symbol;Acc:MGI:95530]
ENSMUST00000121768	4	11	28309	0.245171	Gm16469	predicted gene 16469 Pseudogene [Source:MGI Symbol;Acc:MGI:3645088]
ENSMUST00000084471	4	11	28309	0.245171	Ptprd	protein tyrosine phosphatase, receptor type, D Gene [Source:MGI Symbol;Acc:MGI:97812]
ENSMUST00000023614	4	11	28309	0.245171	Dyrk1a	dual-specificity tyrosine-(Y)-phosphorylation regulated kinase 1a Gene [Source:MGI Symbol;Acc:MGI:1330299]
ENSMUST00000022245	4	11	28309	0.245171	Mrps30	mitochondrial ribosomal protein S30 Gene [Source:MGI Symbol;Acc:MGI:1926237]
ENSMUST00000076983	4	11	28309	0.245171	Mbnl1	muscleblind-like 1 (Drosophila) Gene [Source:MGI Symbol;Acc:MGI:1928482]
ENSMUST00000047037	4	11	28309	0.245171	Thoc2	THO complex 2 Gene [Source:MGI Symbol;Acc:MGI:2442413]
ENSMUST00000059579	4	11	28309	0.245171	Fam76b	family with sequence similarity 76, member B Gene [Source:MGI Symbol;Acc:MGI:1920076]
ENSMUST00000009420	4	11	28309	0.245171	Repin1	replication initiator 1 Gene [Source:MGI Symbol;Acc:MGI:1889817]
ENSMUST00000043618	4	11	28309	0.245171	NA	NA
ENSMUST00000052888	4	11	28309	0.245171	Gm10254	predicted gene 10254 Pseudogene [Source:MGI Symbol;Acc:MGI:3708673]
ENSMUST00000114688	9	42	28309	0.245171	NA	NA
ENSMUST00000119475	4	11	28309	0.245171	Emcn	endomucin Gene [Source:MGI Symbol;Acc:MGI:1891716]
ENSMUST00000099737	4	11	28309	0.245171	NA	NA
ENSMUST00000015796	4	11	28309	0.245171	Steap1	six transmembrane epithelial antigen of the prostate 1 Gene [Source:MGI Symbol;Acc:MGI:1917608]
ENSMUST00000112194	4	11	28309	0.245171	Trappc2	trafficking protein particle complex 2 Gene [Source:MGI Symbol;Acc:MGI:1913476]
ENSMUST00000102726	4	11	28309	0.245171	Cobll1	Cobl-like 1 Gene [Source:MGI Symbol;Acc:MGI:2442894]
ENSMUST00000119422	4	11	28309	0.245171	4930402H24Rik	RIKEN cDNA 4930402H24 gene Gene [Source:MGI Symbol;Acc:MGI:1923029]
ENSMUST00000036263	4	11	28309	0.245171	NA	NA
ENSMUST00000024724	4	11	28309	0.245171	Crisp2	cysteine-rich secretory protein 2 Gene [Source:MGI Symbol;Acc:MGI:98815]
ENSMUST00000102825	4	11	28309	0.245171	Ifit3	interferon-induced protein with tetratricopeptide repeats 3 Gene [Source:MGI Symbol;Acc:MGI:1101055]
ENSMUST00000106644	4	11	28309	0.245171	Nrd1	nardilysin, N-arginine dibasic convertase, NRD convertase 1 Gene [Source:MGI Symbol;Acc:MGI:1201386]
ENSMUST00000111964	7	29	28309	0.25706	Hnrnpa3	heterogeneous nuclear ribonucleoprotein A3 Gene [Source:MGI Symbol;Acc:MGI:1917171]
ENSMUST00000048646	7	29	28309	0.25706	Vps13b	vacuolar protein sorting 13B (yeast) Gene [Source:MGI Symbol;Acc:MGI:1916380]
ENSMUST00000122422	7	29	28309	0.25706	Rpl19-ps11	ribosomal protein L19, pseudogene 11 Pseudogene [Source:MGI Symbol;Acc:MGI:3642193]
ENSMUST00000107093	8	36	28309	0.27151	NA	NA
ENSMUST00000042824	8	36	28309	0.27151	Herc1	hect (homologous to the E6-AP (UBE3A) carboxyl terminus) domain and RCC1 (CHC1)-like domain (RLD) 1 Gene [Source:MGI Symbol;Acc:MGI:2384589]
ENSMUST00000118459	5	17	28309	0.274912	Gm13835	predicted gene 13835 Pseudogene [Source:MGI Symbol;Acc:MGI:3650921]
ENSMUST00000114736	5	17	28309	0.274912	Arhgef6	Rac/Cdc42 guanine nucleotide exchange factor (GEF) 6 Gene [Source:MGI Symbol;Acc:MGI:1920591]
ENSMUST00000066257	5	17	28309	0.274912	Khdrbs1	KH domain containing, RNA binding, signal transduction associated 1 Gene [Source:MGI Symbol;Acc:MGI:893579]
ENSMUST00000113767	5	17	28309	0.274912	Odf2	outer dense fiber of sperm tails 2 Gene [Source:MGI Symbol;Acc:MGI:1098824]
ENSMUST00000070735	5	17	28309	0.274912	Gabrg2	gamma-aminobutyric acid (GABA) A receptor, subunit gamma 2 Gene [Source:MGI Symbol;Acc:MGI:95623]
ENSMUST00000084200	5	17	28309	0.274912	NA	NA
ENSMUST00000026292	12	65	28309	0.274912	Huwe1	HECT, UBA and WWE domain containing 1 Gene [Source:MGI Symbol;Acc:MGI:1926884]
ENSMUST00000035430	5	17	28309	0.274912	Dars2	aspartyl-tRNA synthetase 2 (mitochondrial) Gene [Source:MGI Symbol;Acc:MGI:2442510]
ENSMUST00000064995	5	17	28309	0.274912	Gm13835	predicted gene 13835 Pseudogene [Source:MGI Symbol;Acc:MGI:3650921]
ENSMUST00000069538	5	17	28309	0.274912	9330182L06Rik	RIKEN cDNA 9330182L06 gene Gene [Source:MGI Symbol;Acc:MGI:2443264]
ENSMUST00000106682	5	17	28309	0.274912	Rnf141	ring finger protein 141 Gene [Source:MGI Symbol;Acc:MGI:1914400]
ENSMUST00000121942	6	23	28309	0.274912	Gm6161	predicted gene 6161 Pseudogene [Source:MGI Symbol;Acc:MGI:3644104]
ENSMUST00000036646	5	17	28309	0.274912	Cnot6l	CCR4-NOT transcription complex, subunit 6-like Gene [Source:MGI Symbol;Acc:MGI:2443154]
ENSMUST00000002640	6	23	28309	0.274912	Scin	scinderin Gene [Source:MGI Symbol;Acc:MGI:1306794]
ENSMUST00000099645	6	23	28309	0.274912	NA	NA
ENSMUST00000027981	5	17	28309	0.274912	Uap1	UDP-N-acetylglucosamine pyrophosphorylase 1 Gene [Source:MGI Symbol;Acc:MGI:1334459]
ENSMUST00000027534	5	17	28309	0.274912	Ilkap	integrin-linked kinase-associated serine/threonine phosphatase 2C Gene [Source:MGI Symbol;Acc:MGI:1914694]
ENSMUST00000108086	5	17	28309	0.274912	Hspa4l	heat shock protein 4 like Gene [Source:MGI Symbol;Acc:MGI:107422]
ENSMUST00000114057	5	17	28309	0.274912	Pls3	plastin 3 (T-isoform) Gene [Source:MGI Symbol;Acc:MGI:104807]
ENSMUST00000046334	5	17	28309	0.274912	Exoc6b	exocyst complex component 6B Gene [Source:MGI Symbol;Acc:MGI:1923164]
ENSMUST00000119032	5	17	28309	0.274912	Gm12034	predicted gene 12034 Pseudogene [Source:MGI Symbol;Acc:MGI:3651409]
ENSMUST00000114445	5	17	28309	0.274912	Cbx3	chromobox homolog 3 (Drosophila HP1 gamma) Gene [Source:MGI Symbol;Acc:MGI:108515]
ENSMUST00000085840	5	17	28309	0.274912	Ttbk2	tau tubulin kinase 2 Gene [Source:MGI Symbol;Acc:MGI:2155779]
ENSMUST00000080898	5	17	28309	0.274912	Amd2	S-adenosylmethionine decarboxylase 2 Gene [Source:MGI Symbol;Acc:MGI:1333111]
ENSMUST00000096229	6	23	28309	0.274912	Dnm1l	dynamin 1-like Gene [Source:MGI Symbol;Acc:MGI:1921256]
ENSMUST00000095204	5	17	28309	0.274912	Rasgrp3	RAS, guanyl releasing protein 3 Gene [Source:MGI Symbol;Acc:MGI:3028579]
ENSMUST00000091831	5	17	28309	0.274912	Smad2	MAD homolog 2 (Drosophila) Gene [Source:MGI Symbol;Acc:MGI:108051]
ENSMUST00000061059	5	17	28309	0.274912	NA	NA
ENSMUST00000119438	6	23	28309	0.274912	Rpl10-ps1	ribosomal protein L20, pseudogene 1 Pseudogene [Source:MGI Symbol;Acc:MGI:3650909]
ENSMUST00000111449	5	17	28309	0.274912	Celf1	CUGBP, Elav-like family member 1 Gene [Source:MGI Symbol;Acc:MGI:1342295]
ENSMUST00000069318	5	17	28309	0.274912	Rabggtb	RAB geranylgeranyl transferase, b subunit Gene [Source:MGI Symbol;Acc:MGI:99537]
ENSMUST00000023631	5	17	28309	0.274912	Brwd1	bromodomain and WD repeat domain containing 1 Gene [Source:MGI Symbol;Acc:MGI:1890651]
ENSMUST00000076364	6	23	28309	0.274912	Rpl10-ps3	ribosomal protein L20, pseudogene 3 Pseudogene [Source:MGI Symbol;Acc:MGI:3704336]
ENSMUST00000120054	4	12	28309	0.298102	Gm5406	predicted gene 5406 Pseudogene [Source:MGI Symbol;Acc:MGI:3645119]
ENSMUST00000057495	3	7	28309	0.298102	Tmem161b	transmembrane protein 161B Gene [Source:MGI Symbol;Acc:MGI:1919995]
ENSMUST00000106962	5	18	28309	0.298102	Cdc27	cell division cycle 27 homolog (S. cerevisiae) Gene [Source:MGI Symbol;Acc:MGI:102685]
ENSMUST00000112853	4	12	28309	0.298102	Arhgap24	Rho GTPase activating protein 24 Gene [Source:MGI Symbol;Acc:MGI:1922647]
ENSMUST00000087454	4	12	28309	0.298102	Rps25-ps1	ribosomal protein S25, pseudogene 1 Pseudogene [Source:MGI Symbol;Acc:MGI:3642902]
ENSMUST00000027634	4	12	28309	0.298102	Dbi	diazepam binding inhibitor Gene [Source:MGI Symbol;Acc:MGI:94865]
ENSMUST00000061681	4	12	28309	0.298102	Gm7334	predicted gene 7334 Pseudogene [Source:MGI Symbol;Acc:MGI:3647393]
ENSMUST00000039374	4	12	28309	0.298102	Ddx26b	DEAD/H (Asp-Glu-Ala-Asp/His) box polypeptide 26B Gene [Source:MGI Symbol;Acc:MGI:2442593]
ENSMUST00000062372	5	18	28309	0.298102	Reln	reelin Gene [Source:MGI Symbol;Acc:MGI:103022]
ENSMUST00000072796	5	18	28309	0.298102	Amd-ps3	S-adenosylmethionine decarboxylase, pseudogene 3 Pseudogene [Source:MGI Symbol;Acc:MGI:3704487]
ENSMUST00000005750	5	18	28309	0.298102	NA	NA
ENSMUST00000026270	4	12	28309	0.298102	Sacm1l	SAC1 (suppressor of actin mutations 1, homolog)-like (S. cerevisiae) Gene [Source:MGI Symbol;Acc:MGI:1933169]
ENSMUST00000039160	3	7	28309	0.298102	Gpr176	G protein-coupled receptor 176 Gene [Source:MGI Symbol;Acc:MGI:2685858]
ENSMUST00000045756	3	7	28309	0.298102	S100a10	S100 calcium binding protein A10 (calpactin) Gene [Source:MGI Symbol;Acc:MGI:1339468]
ENSMUST00000055693	4	12	28309	0.298102	Cyp2j9	cytochrome P450, family 2, subfamily j, polypeptide 9 Gene [Source:MGI Symbol;Acc:MGI:1921769]
ENSMUST00000070793	3	7	28309	0.298102	Fastkd3	FAST kinase domains 3 Gene [Source:MGI Symbol;Acc:MGI:1916827]
ENSMUST00000080089	4	12	28309	0.298102	Cul2	cullin 2 Gene [Source:MGI Symbol;Acc:MGI:1918995]
ENSMUST00000076667	3	7	28309	0.298102	0610039K10Rik	RIKEN cDNA 0610039K10 gene Gene [Source:MGI Symbol;Acc:MGI:1915636]
ENSMUST00000028081	3	7	28309	0.298102	Plxdc2	plexin domain containing 2 Gene [Source:MGI Symbol;Acc:MGI:1914698]
ENSMUST00000105267	5	18	28309	0.298102	Cnot2	CCR4-NOT transcription complex, subunit 2 Gene [Source:MGI Symbol;Acc:MGI:1919318]
ENSMUST00000120509	3	7	28309	0.298102	Sgk1	serum/glucocorticoid regulated kinase 1 Gene [Source:MGI Symbol;Acc:MGI:1340062]
ENSMUST00000095004	5	18	28309	0.298102	Gm7347	predicted gene 7347 Gene [Source:MGI Symbol;Acc:MGI:3645983]
ENSMUST00000102981	4	12	28309	0.298102	Sec61a2	Sec61, alpha subunit 2 (S. cerevisiae) Gene [Source:MGI Symbol;Acc:MGI:1931071]
ENSMUST00000106939	4	12	28309	0.298102	Tlk2	tousled-like kinase 2 (Arabidopsis) Gene [Source:MGI Symbol;Acc:MGI:1346023]
ENSMUST00000115152	5	18	28309	0.298102	Reln	reelin Gene [Source:MGI Symbol;Acc:MGI:103022]
ENSMUST00000114723	3	7	28309	0.298102	Cacnb2	calcium channel, voltage-dependent, beta 2 subunit Gene [Source:MGI Symbol;Acc:MGI:894644]
ENSMUST00000113261	5	18	28309	0.298102	Cntn4	contactin 4 Gene [Source:MGI Symbol;Acc:MGI:1095737]
ENSMUST00000109205	4	12	28309	0.298102	Nnt	nicotinamide nucleotide transhydrogenase Gene [Source:MGI Symbol;Acc:MGI:109279]
ENSMUST00000030039	6	24	28309	0.298102	Fmn2	formin 2 Gene [Source:MGI Symbol;Acc:MGI:1859252]
ENSMUST00000008812	6	24	28309	0.298102	Rps18	ribosomal protein S18 Gene [Source:MGI Symbol;Acc:MGI:98146]
ENSMUST00000111337	5	18	28309	0.298102	Ckap5	cytoskeleton associated protein 5 Gene [Source:MGI Symbol;Acc:MGI:1923036]
ENSMUST00000100068	3	7	28309	0.298102	Gm10828	predicted gene 10828 Gene [Source:MGI Symbol;Acc:MGI:3642223]
ENSMUST00000045604	5	18	28309	0.298102	Mrpl41	mitochondrial ribosomal protein L41 Gene [Source:MGI Symbol;Acc:MGI:1333816]
ENSMUST00000025506	4	12	28309	0.298102	Rbm22	RNA binding motif protein 22 Gene [Source:MGI Symbol;Acc:MGI:1914060]
ENSMUST00000067860	3	7	28309	0.298102	NA	NA
ENSMUST00000116537	4	12	28309	0.298102	Bckdhb	branched chain ketoacid dehydrogenase E1, beta polypeptide Gene [Source:MGI Symbol;Acc:MGI:88137]
ENSMUST00000016338	4	12	28309	0.298102	Hsd11b1	hydroxysteroid 11-beta dehydrogenase 1 Gene [Source:MGI Symbol;Acc:MGI:103562]
ENSMUST00000071087	19	122	28309	0.298102	Cspp1	centrosome and spindle pole associated protein 1 Gene [Source:MGI Symbol;Acc:MGI:2681832]
ENSMUST00000050083	3	7	28309	0.298102	Cul4b	cullin 4B Gene [Source:MGI Symbol;Acc:MGI:1919834]
ENSMUST00000041772	5	18	28309	0.298102	Dmxl1	Dmx-like 1 Gene [Source:MGI Symbol;Acc:MGI:2443926]
ENSMUST00000069008	4	12	28309	0.298102	Slc16a11	solute carrier family 16 (monocarboxylic acid transporters), member 11 Gene [Source:MGI Symbol;Acc:MGI:2663709]
ENSMUST00000092673	3	7	28309	0.298102	Sgk1	serum/glucocorticoid regulated kinase 1 Gene [Source:MGI Symbol;Acc:MGI:1340062]
ENSMUST00000072050	4	12	28309	0.298102	Gm5321	predicted gene 5321 Gene [Source:MGI Symbol;Acc:MGI:3645266]
ENSMUST00000073122	3	7	28309	0.298102	Olfr871	olfactory receptor 871 Gene [Source:MGI Symbol;Acc:MGI:3030705]
ENSMUST00000114575	4	12	28309	0.298102	2610030H06Rik	RIKEN cDNA 2610030H06 gene Gene [Source:MGI Symbol;Acc:MGI:1914298]
ENSMUST00000020824	5	18	28309	0.298102	Rps6kb1	ribosomal protein S6 kinase, polypeptide 1 Gene [Source:MGI Symbol;Acc:MGI:1270849]
ENSMUST00000115817	3	7	28309	0.298102	5730494M16Rik	RIKEN cDNA 5730494M16 gene Gene [Source:MGI Symbol;Acc:MGI:1913898]
ENSMUST00000053729	5	18	28309	0.298102	Pdss1	prenyl (solanesyl) diphosphate synthase, subunit 1 Gene [Source:MGI Symbol;Acc:MGI:1889278]
ENSMUST00000029383	3	7	28309	0.298102	Tsc22d2	TSC22 domain family, member 2 Gene [Source:MGI Symbol;Acc:MGI:1919283]
ENSMUST00000056589	3	7	28309	0.298102	BC089491	cDNA sequence BC089491 Gene [Source:MGI Symbol;Acc:MGI:3608324]
ENSMUST00000070000	3	7	28309	0.298102	Arhgap24	Rho GTPase activating protein 24 Gene [Source:MGI Symbol;Acc:MGI:1922647]
ENSMUST00000069557	4	12	28309	0.298102	Smad5	MAD homolog 5 (Drosophila) Gene [Source:MGI Symbol;Acc:MGI:1328787]
ENSMUST00000034947	3	7	28309	0.298102	Ppib	peptidylprolyl isomerase B Gene [Source:MGI Symbol;Acc:MGI:97750]
ENSMUST00000100910	4	12	28309	0.298102	Xaf1	XIAP associated factor 1 Gene [Source:MGI Symbol;Acc:MGI:3772572]
ENSMUST00000064218	5	18	28309	0.298102	Cnot2	CCR4-NOT transcription complex, subunit 2 Gene [Source:MGI Symbol;Acc:MGI:1919318]
ENSMUST00000115142	3	7	28309	0.298102	Zbtb33	zinc finger and BTB domain containing 33 Gene [Source:MGI Symbol;Acc:MGI:1927290]
ENSMUST00000031862	5	18	28309	0.298102	Cbx3	chromobox homolog 3 (Drosophila HP1 gamma) Gene [Source:MGI Symbol;Acc:MGI:108515]
ENSMUST00000115466	4	12	28309	0.298102	Usp9x	ubiquitin specific peptidase 9, X chromosome Gene [Source:MGI Symbol;Acc:MGI:894681]
ENSMUST00000040820	5	18	28309	0.298102	Maob	monoamine oxidase B Gene [Source:MGI Symbol;Acc:MGI:96916]
ENSMUST00000092557	3	7	28309	0.298102	Arhgap27	Rho GTPase activating protein 27 Gene [Source:MGI Symbol;Acc:MGI:1916903]
ENSMUST00000022398	4	12	28309	0.298102	1700011H14Rik	RIKEN cDNA 1700011H14 gene Gene [Source:MGI Symbol;Acc:MGI:1914332]
ENSMUST00000101427	4	12	28309	0.298102	Ccdc88a	coiled coil domain containing 88A Gene [Source:MGI Symbol;Acc:MGI:1925177]
ENSMUST00000106549	3	7	28309	0.298102	2310008H09Rik	RIKEN cDNA 2310008H09 gene Gene [Source:MGI Symbol;Acc:MGI:1913606]
ENSMUST00000072566	4	12	28309	0.298102	Nme2	non-metastatic cells 2, protein (NM23B) expressed in Gene [Source:MGI Symbol;Acc:MGI:97356]
ENSMUST00000027052	5	18	28309	0.298102	Stau2	staufen (RNA binding protein) homolog 2 (Drosophila) Gene [Source:MGI Symbol;Acc:MGI:1352508]
ENSMUST00000063593	4	12	28309	0.298102	Erich1	glutamate-rich 1 Gene [Source:MGI Symbol;Acc:MGI:3588201]
ENSMUST00000029796	4	12	28309	0.298102	Rap1gds1	RAP1, GTP-GDP dissociation stimulator 1 Gene [Source:MGI Symbol;Acc:MGI:2385189]
ENSMUST00000122003	5	18	28309	0.298102	Cnot6l	CCR4-NOT transcription complex, subunit 6-like Gene [Source:MGI Symbol;Acc:MGI:2443154]
ENSMUST00000028102	4	12	28309	0.298102	Kif5c	kinesin family member 5C Gene [Source:MGI Symbol;Acc:MGI:1098269]
ENSMUST00000092302	3	7	28309	0.298102	Fn3k	fructosamine 3 kinase Gene [Source:MGI Symbol;Acc:MGI:1926834]
ENSMUST00000062740	5	18	28309	0.298102	Acp1	acid phosphatase 1, soluble Gene [Source:MGI Symbol;Acc:MGI:87881]
ENSMUST00000113712	3	7	28309	0.298102	Tia1	cytotoxic granule-associated RNA binding protein 1 Gene [Source:MGI Symbol;Acc:MGI:107914]
ENSMUST00000033847	4	12	28309	0.298102	Agpat5	1-acylglycerol-3-phosphate O-acyltransferase 5 (lysophosphatidic acid acyltransferase, epsilon) Gene [Source:MGI Symbol;Acc:MGI:1196345]
ENSMUST00000058994	3	7	28309	0.298102	Tram1l1	translocation associated membrane protein 1-like 1 Gene [Source:MGI Symbol;Acc:MGI:2443503]
ENSMUST00000016681	3	7	28309	0.298102	Cul4b	cullin 4B Gene [Source:MGI Symbol;Acc:MGI:1919834]
ENSMUST00000085858	6	24	28309	0.298102	Fmn2	formin 2 Gene [Source:MGI Symbol;Acc:MGI:1859252]
ENSMUST00000034058	3	7	28309	0.298102	Cbr4	carbonyl reductase 4 Gene [Source:MGI Symbol;Acc:MGI:2384567]
ENSMUST00000044297	4	12	28309	0.298102	Igfbpl1	insulin-like growth factor binding protein-like 1 Gene [Source:MGI Symbol;Acc:MGI:1933198]
ENSMUST00000081922	3	7	28309	0.298102	NA	NA
ENSMUST00000077119	4	12	28309	0.298102	Gjc3	gap junction protein, gamma 3 Gene [Source:MGI Symbol;Acc:MGI:2153041]
ENSMUST00000073192	4	12	28309	0.298102	Erlec1	endoplasmic reticulum lectin 1 Gene [Source:MGI Symbol;Acc:MGI:1914003]
ENSMUST00000027642	5	18	28309	0.298102	Nek7	NIMA (never in mitosis gene a)-related expressed kinase 7 Gene [Source:MGI Symbol;Acc:MGI:1890645]
ENSMUST00000022009	3	7	28309	0.298102	Cetn3	centrin 3 Gene [Source:MGI Symbol;Acc:MGI:1097706]
ENSMUST00000117446	3	7	28309	0.298102	Pttg1	pituitary tumor-transforming gene 1 Gene [Source:MGI Symbol;Acc:MGI:1353578]
ENSMUST00000094398	4	12	28309	0.298102	Uevld	UEV and lactate/malate dehyrogenase domains Gene [Source:MGI Symbol;Acc:MGI:1860490]
ENSMUST00000097961	4	12	28309	0.298102	Alg6	asparagine-linked glycosylation 6 homolog (yeast, alpha-1,3,-glucosyltransferase) Gene [Source:MGI Symbol;Acc:MGI:2444031]
ENSMUST00000085108	3	7	28309	0.298102	Foxn3	forkhead box N3 Gene [Source:MGI Symbol;Acc:MGI:1918625]
ENSMUST00000105840	3	7	28309	0.298102	Usp48	ubiquitin specific peptidase 48 Gene [Source:MGI Symbol;Acc:MGI:2158502]
ENSMUST00000118775	3	7	28309	0.298102	Gm15195	predicted gene 15195 Pseudogene [Source:MGI Symbol;Acc:MGI:3705434]
ENSMUST00000107247	4	12	28309	0.298102	Nfib	nuclear factor I/B Gene [Source:MGI Symbol;Acc:MGI:103188]
ENSMUST00000026485	4	12	28309	0.298102	Hdhd2	haloacid dehalogenase-like hydrolase domain containing 2 Gene [Source:MGI Symbol;Acc:MGI:1924237]
ENSMUST00000089377	4	12	28309	0.298102	Lgals1	lectin, galactose binding, soluble 1 Gene [Source:MGI Symbol;Acc:MGI:96777]
ENSMUST00000048794	4	12	28309	0.298102	Hoxa5	homeobox A5 Gene [Source:MGI Symbol;Acc:MGI:96177]
ENSMUST00000112510	4	12	28309	0.298102	Rbms1	RNA binding motif, single stranded interacting protein 1 Gene [Source:MGI Symbol;Acc:MGI:1861774]
ENSMUST00000118614	3	7	28309	0.298102	Gm12058	predicted gene 12058 Pseudogene [Source:MGI Symbol;Acc:MGI:3652312]
ENSMUST00000093132	3	7	28309	0.298102	Clk4	CDC like kinase 4 Gene [Source:MGI Symbol;Acc:MGI:1098551]
ENSMUST00000041595	3	7	28309	0.298102	Stag1	stromal antigen 1 Gene [Source:MGI Symbol;Acc:MGI:1098658]
ENSMUST00000114787	5	18	28309	0.298102	Stxbp5l	syntaxin binding protein 5-like Gene [Source:MGI Symbol;Acc:MGI:2443815]
ENSMUST00000098355	4	12	28309	0.298102	Gm10615	predicted gene 10615 Gene [Source:MGI Symbol;Acc:MGI:3642102]
ENSMUST00000030346	4	12	28309	0.298102	0610037L13Rik	RIKEN cDNA 0610037L13 gene Gene [Source:MGI Symbol;Acc:MGI:1921348]
ENSMUST00000047357	3	7	28309	0.298102	Cpsf2	cleavage and polyadenylation specific factor 2 Gene [Source:MGI Symbol;Acc:MGI:1861601]
ENSMUST00000114659	3	7	28309	0.298102	0610007C21Rik	RIKEN cDNA 0610007C21 gene Gene [Source:MGI Symbol;Acc:MGI:1918918]
ENSMUST00000099974	4	12	28309	0.298102	Cerkl	ceramide kinase-like Gene [Source:MGI Symbol;Acc:MGI:3037816]
ENSMUST00000101354	4	12	28309	0.298102	Slbp	stem-loop binding protein Gene [Source:MGI Symbol;Acc:MGI:108402]
ENSMUST00000102716	3	7	28309	0.298102	Glra1	glycine receptor, alpha 1 subunit Gene [Source:MGI Symbol;Acc:MGI:95747]
ENSMUST00000097742	4	12	28309	0.298102	Tmem88b	transmembrane protein 88B Gene [Source:MGI Symbol;Acc:MGI:2444329]
ENSMUST00000100820	3	7	28309	0.298102	Plac9	placenta specific 9 Gene [Source:MGI Symbol;Acc:MGI:2663998]
ENSMUST00000073444	3	7	28309	0.298102	NA	NA
ENSMUST00000002805	4	12	28309	0.298102	Naa20	N(alpha)-acetyltransferase 20, NatB catalytic subunit Gene [Source:MGI Symbol;Acc:MGI:1915127]
ENSMUST00000025563	3	7	28309	0.298102	Fth1	ferritin heavy chain 1 Gene [Source:MGI Symbol;Acc:MGI:95588]
ENSMUST00000034827	3	7	28309	0.298102	Imp3	IMP3, U3 small nucleolar ribonucleoprotein, homolog (yeast) Gene [Source:MGI Symbol;Acc:MGI:1916119]
ENSMUST00000099149	4	12	28309	0.298102	Nnt	nicotinamide nucleotide transhydrogenase Gene [Source:MGI Symbol;Acc:MGI:109279]
ENSMUST00000109206	4	12	28309	0.298102	Nnt	nicotinamide nucleotide transhydrogenase Gene [Source:MGI Symbol;Acc:MGI:109279]
ENSMUST00000113203	3	7	28309	0.298102	Hnrnph2	heterogeneous nuclear ribonucleoprotein H2 Gene [Source:MGI Symbol;Acc:MGI:1201779]
ENSMUST00000046689	4	12	28309	0.298102	2810474O19Rik	RIKEN cDNA 2810474O19 gene Gene [Source:MGI Symbol;Acc:MGI:1914496]
ENSMUST00000068293	4	12	28309	0.298102	C030030A07Rik	RIKEN cDNA C030030A07 gene Gene [Source:MGI Symbol;Acc:MGI:2443451]
ENSMUST00000109078	4	12	28309	0.298102	Cdkl3	cyclin-dependent kinase-like 3 Gene [Source:MGI Symbol;Acc:MGI:2388268]
ENSMUST00000106830	5	18	28309	0.298102	Dab1	disabled homolog 1 (Drosophila) Gene [Source:MGI Symbol;Acc:MGI:108554]
ENSMUST00000109232	3	7	28309	0.298102	Med7	mediator complex subunit 7 Gene [Source:MGI Symbol;Acc:MGI:1913463]
ENSMUST00000074072	5	18	28309	0.298102	Gm10260	predicted gene 10260 Gene [Source:MGI Symbol;Acc:MGI:3642298]
ENSMUST00000060839	4	12	28309	0.298102	Cntnap2	contactin associated protein-like 2 Gene [Source:MGI Symbol;Acc:MGI:1914047]
ENSMUST00000107793	4	12	28309	0.298102	Cacna1g	calcium channel, voltage-dependent, T type, alpha 1G subunit Gene [Source:MGI Symbol;Acc:MGI:1201678]
ENSMUST00000026199	4	12	28309	0.298102	Cutc	cutC copper transporter homolog (E.coli) Gene [Source:MGI Symbol;Acc:MGI:1913638]
ENSMUST00000041370	4	12	28309	0.298102	Txlng	taxilin gamma Gene [Source:MGI Symbol;Acc:MGI:3590652]
ENSMUST00000050077	3	7	28309	0.298102	Lancl2	LanC (bacterial lantibiotic synthetase component C)-like 2 Gene [Source:MGI Symbol;Acc:MGI:1919085]
ENSMUST00000042662	4	12	28309	0.298102	Mzt1	mitotic spindle organizing protein 1 Gene [Source:MGI Symbol;Acc:MGI:1924039]
ENSMUST00000107055	3	7	28309	0.298102	Nfia	nuclear factor I/A Gene [Source:MGI Symbol;Acc:MGI:108056]
ENSMUST00000057093	4	12	28309	0.298102	Nkrf	NF-kappaB repressing factor Gene [Source:MGI Symbol;Acc:MGI:1924536]
ENSMUST00000038403	3	7	28309	0.298102	Ica1	islet cell autoantigen 1 Gene [Source:MGI Symbol;Acc:MGI:96391]
ENSMUST00000122190	4	12	28309	0.298102	Gm4879	predicted pseudogene 4879 Pseudogene [Source:MGI Symbol;Acc:MGI:3648111]
ENSMUST00000116280	3	7	28309	0.298102	2310008H09Rik	RIKEN cDNA 2310008H09 gene Gene [Source:MGI Symbol;Acc:MGI:1913606]
ENSMUST00000105754	3	7	28309	0.298102	C87977	expressed sequence C87977 Gene [Source:MGI Symbol;Acc:MGI:2140708]
ENSMUST00000049257	4	12	28309	0.298102	Ddx52	DEAD (Asp-Glu-Ala-Asp) box polypeptide 52 Gene [Source:MGI Symbol;Acc:MGI:1925644]
ENSMUST00000121529	3	7	28309	0.298102	Hmox2	heme oxygenase (decycling) 2 Gene [Source:MGI Symbol;Acc:MGI:109373]
ENSMUST00000022225	4	12	28309	0.298102	Trim23	tripartite motif-containing 23 Gene [Source:MGI Symbol;Acc:MGI:1933161]
ENSMUST00000045288	4	12	28309	0.298102	Tgfb2	transforming growth factor, beta 2 Gene [Source:MGI Symbol;Acc:MGI:98726]
ENSMUST00000090818	3	7	28309	0.298102	Gabpb2	GA repeat binding protein, beta 2 Gene [Source:MGI Symbol;Acc:MGI:95612]
ENSMUST00000020482	4	12	28309	0.298102	NA	NA
ENSMUST00000114133	5	18	28309	0.298102	Ikbkg	inhibitor of kappaB kinase gamma Gene [Source:MGI Symbol;Acc:MGI:1338074]
ENSMUST00000067877	4	12	28309	0.298102	NA	NA
ENSMUST00000073466	4	12	28309	0.298102	Cryzl1	crystallin, zeta (quinone reductase)-like 1 Gene [Source:MGI Symbol;Acc:MGI:1913859]
ENSMUST00000112638	4	12	28309	0.298102	Il3ra	interleukin 3 receptor, alpha chain Gene [Source:MGI Symbol;Acc:MGI:96553]
ENSMUST00000110328	3	7	28309	0.298102	Azin1	antizyme inhibitor 1 Gene [Source:MGI Symbol;Acc:MGI:1859169]
ENSMUST00000029876	3	7	28309	0.298102	Calb1	calbindin 1 Gene [Source:MGI Symbol;Acc:MGI:88248]
ENSMUST00000003818	4	12	28309	0.298102	Insig2	insulin induced gene 2 Gene [Source:MGI Symbol;Acc:MGI:1920249]
ENSMUST00000115453	3	7	28309	0.298102	Cav1	caveolin 1, caveolae protein Gene [Source:MGI Symbol;Acc:MGI:102709]
ENSMUST00000100002	3	7	28309	0.298102	NA	NA
ENSMUST00000004913	4	12	28309	0.298102	Pgf	placental growth factor Gene [Source:MGI Symbol;Acc:MGI:105095]
ENSMUST00000112696	4	12	28309	0.298102	Zfp644	zinc finger protein 644 Gene [Source:MGI Symbol;Acc:MGI:1277212]
ENSMUST00000045907	4	12	28309	0.298102	2700049A03Rik	RIKEN cDNA 2700049A03 gene Gene [Source:MGI Symbol;Acc:MGI:1924217]
ENSMUST00000102598	3	7	28309	0.298102	Rbbp4	retinoblastoma binding protein 4 Gene [Source:MGI Symbol;Acc:MGI:1194912]
ENSMUST00000052699	4	12	28309	0.298102	Suv420h1	suppressor of variegation 4-20 homolog 1 (Drosophila) Gene [Source:MGI Symbol;Acc:MGI:2444557]
ENSMUST00000098973	3	7	28309	0.298102	Ubtfl1	upstream binding transcription factor, RNA polymerase I-like 1 Gene [Source:MGI Symbol;Acc:MGI:3588290]
ENSMUST00000121084	3	7	28309	0.298102	Smt3h2-ps	SMT3 suppressor of mif two 3 homolog 2, pseudogene (S. cerevisiae) Pseudogene [Source:MGI Symbol;Acc:MGI:1859622]
ENSMUST00000021958	4	12	28309	0.298102	Pcbd2	pterin 4 alpha carbinolamine dehydratase/dimerization cofactor of hepatocyte nuclear factor 1 alpha (TCF1) 2 Gene [Source:MGI Symbol;Acc:MGI:1919812]
ENSMUST00000088784	3	7	28309	0.298102	Rpl27-ps1	ribosomal protein L27, pseudogene 1 Pseudogene [Source:MGI Symbol;Acc:MGI:3645348]
ENSMUST00000114669	3	7	28309	0.298102	Mllt10	myeloid/lymphoid or mixed-lineage leukemia (trithorax homolog, Drosophila); translocated to, 10 Gene [Source:MGI Symbol;Acc:MGI:1329038]
ENSMUST00000114779	4	12	28309	0.298102	Ssbp1	single-stranded DNA binding protein 1 Gene [Source:MGI Symbol;Acc:MGI:1920040]
ENSMUST00000115432	4	12	28309	0.298102	NA	NA
ENSMUST00000110814	3	7	28309	0.298102	Cd46	CD46 antigen, complement regulatory protein Gene [Source:MGI Symbol;Acc:MGI:1203290]
ENSMUST00000055104	3	7	28309	0.298102	Tceal1	transcription elongation factor A (SII)-like 1 Gene [Source:MGI Symbol;Acc:MGI:2385317]
ENSMUST00000051309	4	12	28309	0.298102	Olfm3	olfactomedin 3 Gene [Source:MGI Symbol;Acc:MGI:2387329]
ENSMUST00000046542	3	7	28309	0.298102	Rsrc1	arginine/serine-rich coiled-coil 1 Gene [Source:MGI Symbol;Acc:MGI:1914130]
ENSMUST00000062397	3	7	28309	0.298102	Nudt3	nudix (nucleotide diphosphate linked moiety X)-type motif 3 Gene [Source:MGI Symbol;Acc:MGI:1928484]
ENSMUST00000095458	4	12	28309	0.298102	2810008M24Rik	RIKEN cDNA 2810008M24 gene Gene [Source:MGI Symbol;Acc:MGI:1922866]
ENSMUST00000111523	3	7	28309	0.298102	Olfr1254	olfactory receptor 1254 Gene [Source:MGI Symbol;Acc:MGI:3031088]
ENSMUST00000112527	4	12	28309	0.298102	Asah2	N-acylsphingosine amidohydrolase 2 Gene [Source:MGI Symbol;Acc:MGI:1859310]
ENSMUST00000108262	5	18	28309	0.298102	Samd7	sterile alpha motif domain containing 7 Gene [Source:MGI Symbol;Acc:MGI:1923203]
ENSMUST00000107623	3	7	28309	0.298102	Sp2	Sp2 transcription factor Gene [Source:MGI Symbol;Acc:MGI:1926162]
ENSMUST00000031447	3	7	28309	0.298102	Anxa3	annexin A3 Gene [Source:MGI Symbol;Acc:MGI:1201378]
ENSMUST00000026990	4	12	28309	0.298102	Thoc3	THO complex 3 Gene [Source:MGI Symbol;Acc:MGI:1920916]
ENSMUST00000092517	5	18	28309	0.298102	Smurf2	SMAD specific E3 ubiquitin protein ligase 2 Gene [Source:MGI Symbol;Acc:MGI:1913563]
ENSMUST00000122178	3	7	28309	0.298102	Gm14328	predicted gene 14328 Pseudogene [Source:MGI Symbol;Acc:MGI:3651951]
ENSMUST00000099546	3	7	28309	0.298102	Chst14	carbohydrate (N-acetylgalactosamine 4-0) sulfotransferase 14 Gene [Source:MGI Symbol;Acc:MGI:1919386]
ENSMUST00000090052	4	12	28309	0.298102	Yeats2	YEATS domain containing 2 Gene [Source:MGI Symbol;Acc:MGI:2447762]
ENSMUST00000115118	3	7	28309	0.298102	Cul4b	cullin 4B Gene [Source:MGI Symbol;Acc:MGI:1919834]
ENSMUST00000044509	3	7	28309	0.298102	Tspyl2	TSPY-like 2 Gene [Source:MGI Symbol;Acc:MGI:106244]
ENSMUST00000087622	3	7	28309	0.298102	Plekha5	pleckstrin homology domain containing, family A member 5 Gene [Source:MGI Symbol;Acc:MGI:1923802]
ENSMUST00000021428	5	18	28309	0.298102	Snw1	SNW domain containing 1 Gene [Source:MGI Symbol;Acc:MGI:1913604]
ENSMUST00000044115	3	7	28309	0.298102	Zscan2	zinc finger and SCAN domain containing 2 Gene [Source:MGI Symbol;Acc:MGI:99176]
ENSMUST00000049893	3	7	28309	0.298102	NA	NA
ENSMUST00000022897	3	7	28309	0.298102	4930447A16Rik	RIKEN cDNA 4930447A16 gene Gene [Source:MGI Symbol;Acc:MGI:1922142]
ENSMUST00000071858	4	12	28309	0.298102	Hpcal1	hippocalcin-like 1 Gene [Source:MGI Symbol;Acc:MGI:1855689]
ENSMUST00000029386	4	12	28309	0.298102	Etfdh	electron transferring flavoprotein, dehydrogenase Gene [Source:MGI Symbol;Acc:MGI:106100]
ENSMUST00000106081	3	7	28309	0.298102	NA	NA
ENSMUST00000049518	3	7	28309	0.298102	4930441O14Rik	RIKEN cDNA 4930441O14 gene Gene [Source:MGI Symbol;Acc:MGI:1915521]
ENSMUST00000049382	4	12	28309	0.298102	Gatad2b	GATA zinc finger domain containing 2B Gene [Source:MGI Symbol;Acc:MGI:2443225]
ENSMUST00000020652	4	12	28309	0.298102	NA	NA
ENSMUST00000043774	4	12	28309	0.298102	4933433C11Rik	RIKEN cDNA 4933433C11 gene Gene [Source:MGI Symbol;Acc:MGI:1921722]
ENSMUST00000076635	4	12	28309	0.298102	Zfp280c	zinc finger protein 280C Gene [Source:MGI Symbol;Acc:MGI:2387585]
ENSMUST00000030028	4	12	28309	0.298102	Erp44	endoplasmic reticulum protein 44 Gene [Source:MGI Symbol;Acc:MGI:1923549]
ENSMUST00000073822	3	7	28309	0.298102	Opcml	opioid binding protein/cell adhesion molecule-like Gene [Source:MGI Symbol;Acc:MGI:97397]
ENSMUST00000072100	4	12	28309	0.298102	Dbpht2	DNA binding protein with his-thr domain Gene [Source:MGI Symbol;Acc:MGI:2679513]
ENSMUST00000122417	4	12	28309	0.298102	Gm14117	predicted gene 14117 Pseudogene [Source:MGI Symbol;Acc:MGI:3651328]
ENSMUST00000066968	3	7	28309	0.298102	NA	NA
ENSMUST00000115521	3	7	28309	0.298102	Ica1	islet cell autoantigen 1 Gene [Source:MGI Symbol;Acc:MGI:96391]
ENSMUST00000068487	4	12	28309	0.298102	Rad18	RAD18 homolog (S. cerevisiae) Gene [Source:MGI Symbol;Acc:MGI:1890476]
ENSMUST00000114578	3	7	28309	0.298102	Vma21-ps	VMA21 vacuolar H+-ATPase homolog (S. cerevisiae), pseudogene Pseudogene [Source:MGI Symbol;Acc:MGI:3643145]
ENSMUST00000025288	4	12	28309	0.298102	Zfp521	zinc finger protein 521 Gene [Source:MGI Symbol;Acc:MGI:95459]
ENSMUST00000025659	3	7	28309	0.298102	Zfand5	zinc finger, AN1-type domain 5 Gene [Source:MGI Symbol;Acc:MGI:1278334]
ENSMUST00000035493	5	18	28309	0.298102	Hnrnpf	heterogeneous nuclear ribonucleoprotein F Gene [Source:MGI Symbol;Acc:MGI:2138741]
ENSMUST00000032362	4	12	28309	0.298102	Slco1c1	solute carrier organic anion transporter family, member 1c1 Gene [Source:MGI Symbol;Acc:MGI:1889679]
ENSMUST00000107288	4	12	28309	0.298102	Ptprd	protein tyrosine phosphatase, receptor type, D Gene [Source:MGI Symbol;Acc:MGI:97812]
ENSMUST00000052286	3	7	28309	0.298102	Gm9780	predicted gene 9780 Gene [Source:MGI Symbol;Acc:MGI:3710532]
ENSMUST00000064841	4	12	28309	0.298102	Gm9890	predicted gene 9890 Gene [Source:MGI Symbol;Acc:MGI:3642649]
ENSMUST00000092096	4	12	28309	0.298102	Usp14	ubiquitin specific peptidase 14 Gene [Source:MGI Symbol;Acc:MGI:1928898]
ENSMUST00000113888	3	7	28309	0.298102	Dguok	deoxyguanosine kinase Gene [Source:MGI Symbol;Acc:MGI:1351602]
ENSMUST00000113317	3	7	28309	0.298102	Pla2g16	phospholipase A2, group XVI Gene [Source:MGI Symbol;Acc:MGI:2179715]
ENSMUST00000107006	3	7	28309	0.298102	NA	NA
ENSMUST00000092706	3	7	28309	0.298102	Cdc6	cell division cycle 6 homolog (S. cerevisiae) Gene [Source:MGI Symbol;Acc:MGI:1345150]
ENSMUST00000106961	4	12	28309	0.298102	Cdc27	cell division cycle 27 homolog (S. cerevisiae) Gene [Source:MGI Symbol;Acc:MGI:102685]
ENSMUST00000110385	6	24	28309	0.298102	Rpl30-ps11	ribosomal protein L30, pseudogene 11 Pseudogene [Source:MGI Symbol;Acc:MGI:3642364]
ENSMUST00000100207	4	12	28309	0.298102	Fnbp1	formin binding protein 1 Gene [Source:MGI Symbol;Acc:MGI:109606]
ENSMUST00000110219	4	12	28309	0.298102	Ttll5	tubulin tyrosine ligase-like family, member 5 Gene [Source:MGI Symbol;Acc:MGI:2443657]
ENSMUST00000030501	3	7	28309	0.298102	Ebna1bp2	EBNA1 binding protein 2 Gene [Source:MGI Symbol;Acc:MGI:1916322]
ENSMUST00000112672	3	7	28309	0.298102	A830010M20Rik	RIKEN cDNA A830010M20 gene Gene [Source:MGI Symbol;Acc:MGI:2445097]
ENSMUST00000108316	3	7	28309	0.298102	BC089491	cDNA sequence BC089491 Gene [Source:MGI Symbol;Acc:MGI:3608324]
ENSMUST00000116565	3	7	28309	0.298102	Brcc3	BRCA1/BRCA2-containing complex, subunit 3 Gene [Source:MGI Symbol;Acc:MGI:2389572]
ENSMUST00000101466	3	7	28309	0.298102	NA	NA
ENSMUST00000112086	5	18	28309	0.298102	Tnnt2	troponin T2, cardiac Gene [Source:MGI Symbol;Acc:MGI:104597]
ENSMUST00000062215	3	7	28309	0.298102	Cxcr5	chemochine (C-X-C motif) receptor 5 Gene [Source:MGI Symbol;Acc:MGI:103567]
ENSMUST00000120592	3	7	28309	0.298102	Pvalb	parvalbumin Gene [Source:MGI Symbol;Acc:MGI:97821]
ENSMUST00000102769	3	7	28309	0.298102	Mmadhc	methylmalonic aciduria (cobalamin deficiency) cblD type, with homocystinuria Gene [Source:MGI Symbol;Acc:MGI:1923786]
ENSMUST00000101363	3	7	28309	0.298102	NA	NA
ENSMUST00000099590	3	7	28309	0.298102	Slc12a6	solute carrier family 12, member 6 Gene [Source:MGI Symbol;Acc:MGI:2135960]
ENSMUST00000032078	3	7	28309	0.298102	Cct7	chaperonin containing Tcp1, subunit 7 (eta) Gene [Source:MGI Symbol;Acc:MGI:107184]
ENSMUST00000036383	3	7	28309	0.298102	Dnali1	dynein, axonemal, light intermediate polypeptide 1 Gene [Source:MGI Symbol;Acc:MGI:1922813]
ENSMUST00000037854	4	12	28309	0.298102	Diap2	diaphanous homolog 2 (Drosophila) Gene [Source:MGI Symbol;Acc:MGI:1858500]
ENSMUST00000112147	4	12	28309	0.298102	Frmpd4	FERM and PDZ domain containing 4 Gene [Source:MGI Symbol;Acc:MGI:3042378]
ENSMUST00000028362	4	12	28309	0.298102	Ly75	lymphocyte antigen 75 Gene [Source:MGI Symbol;Acc:MGI:106662]
ENSMUST00000035242	3	7	28309	0.298102	Rab24	RAB24, member RAS oncogene family Gene [Source:MGI Symbol;Acc:MGI:105065]
ENSMUST00000103166	4	12	28309	0.298102	Cacna1g	calcium channel, voltage-dependent, T type, alpha 1G subunit Gene [Source:MGI Symbol;Acc:MGI:1201678]
ENSMUST00000107352	4	12	28309	0.298102	Snapin	SNAP-associated protein Gene [Source:MGI Symbol;Acc:MGI:1333745]
ENSMUST00000107007	4	12	28309	0.298102	NA	NA
ENSMUST00000098618	7	30	28309	0.298102	NA	NA
ENSMUST00000025811	3	7	28309	0.298102	Yif1a	Yip1 interacting factor homolog A (S. cerevisiae) Gene [Source:MGI Symbol;Acc:MGI:1915340]
ENSMUST00000116607	3	7	28309	0.298102	Nt5c3	5'-nucleotidase, cytosolic III Gene [Source:MGI Symbol;Acc:MGI:1927186]
ENSMUST00000121096	4	12	28309	0.298102	Art3	ADP-ribosyltransferase 3 Gene [Source:MGI Symbol;Acc:MGI:1202729]
ENSMUST00000052053	4	12	28309	0.298102	NA	NA
ENSMUST00000100561	4	12	28309	0.298102	Cacna1g	calcium channel, voltage-dependent, T type, alpha 1G subunit Gene [Source:MGI Symbol;Acc:MGI:1201678]
ENSMUST00000025118	3	7	28309	0.298102	5730494M16Rik	RIKEN cDNA 5730494M16 gene Gene [Source:MGI Symbol;Acc:MGI:1913898]
ENSMUST00000117262	4	12	28309	0.298102	Slc4a1ap	solute carrier family 4 (anion exchanger), member 1, adaptor protein Gene [Source:MGI Symbol;Acc:MGI:1196608]
ENSMUST00000119921	4	12	28309	0.298102	Nmnat1	nicotinamide nucleotide adenylyltransferase 1 Gene [Source:MGI Symbol;Acc:MGI:1913704]
ENSMUST00000074654	3	7	28309	0.298102	Fgf9	fibroblast growth factor 9 Gene [Source:MGI Symbol;Acc:MGI:104723]
ENSMUST00000100953	4	12	28309	0.298102	NA	NA
ENSMUST00000113198	3	7	28309	0.298102	Armcx1	armadillo repeat containing, X-linked 1 Gene [Source:MGI Symbol;Acc:MGI:1925498]
ENSMUST00000097420	4	12	28309	0.298102	Rnaset2a	ribonuclease T2A Gene [Source:MGI Symbol;Acc:MGI:1915445]
ENSMUST00000111729	3	7	28309	0.298102	Vps29	vacuolar protein sorting 29 (S. pombe) Gene [Source:MGI Symbol;Acc:MGI:1928344]
ENSMUST00000025714	3	7	28309	0.298102	Rpp30	ribonuclease P/MRP 30 subunit (human) Gene [Source:MGI Symbol;Acc:MGI:1859683]
ENSMUST00000089948	3	7	28309	0.298102	Slc44a5	solute carrier family 44, member 5 Gene [Source:MGI Symbol;Acc:MGI:3035141]
ENSMUST00000034720	4	12	28309	0.298102	Grinl1a	glutamate receptor, ionotropic, N-methyl D-aspartate-like 1A Gene [Source:MGI Symbol;Acc:MGI:107282]
ENSMUST00000043675	9	45	28309	0.300539	Atp5l	ATP synthase, H+ transporting, mitochondrial F0 complex, subunit g Gene [Source:MGI Symbol;Acc:MGI:1351597]
ENSMUST00000017548	7	31	28309	0.302349	Rpl19	ribosomal protein L19 Gene [Source:MGI Symbol;Acc:MGI:98020]
ENSMUST00000098117	7	31	28309	0.302349	Gm10593	predicted gene 10593 Gene [Source:MGI Symbol;Acc:MGI:3710526]
ENSMUST00000084673	7	31	28309	0.302349	Gm3892	predicted gene 3892 Gene [Source:MGI Symbol;Acc:MGI:3782065]
ENSMUST00000107997	7	31	28309	0.302349	NA	NA
ENSMUST00000099224	7	31	28309	0.302349	Csnk2a1	casein kinase 2, alpha 1 polypeptide Gene [Source:MGI Symbol;Acc:MGI:88543]
ENSMUST00000022901	2	3	28309	0.326159	Rrm2b	ribonucleotide reductase M2 B (TP53 inducible) Gene [Source:MGI Symbol;Acc:MGI:2155865]
ENSMUST00000114896	2	3	28309	0.326159	Atp5c1	ATP synthase, H+ transporting, mitochondrial F1 complex, gamma polypeptide 1 Gene [Source:MGI Symbol;Acc:MGI:1261437]
ENSMUST00000082396	2	3	28309	0.326159	mt-Nd2	mitochondrially encoded NADH dehydrogenase 2 Gene [Source:MGI Symbol;Acc:MGI:102500]
ENSMUST00000104975	2	3	28309	0.326159	Gm6525	predicted pseudogene 6525 Pseudogene [Source:MGI Symbol;Acc:MGI:3648757]
ENSMUST00000028293	2	3	28309	0.326159	Sdccag3	serologically defined colon cancer antigen 3 Gene [Source:MGI Symbol;Acc:MGI:1915362]
ENSMUST00000002029	2	3	28309	0.326159	Emd	emerin Gene [Source:MGI Symbol;Acc:MGI:108117]
ENSMUST00000105022	2	3	28309	0.326159	NA	NA
ENSMUST00000109114	2	3	28309	0.326159	Clk1	CDC-like kinase 1 Gene [Source:MGI Symbol;Acc:MGI:107403]
ENSMUST00000021407	2	3	28309	0.326159	Srp54b	signal recognition particle 54B Gene [Source:MGI Symbol;Acc:MGI:3714357]
ENSMUST00000051605	2	3	28309	0.326159	Dut	deoxyuridine triphosphatase Gene [Source:MGI Symbol;Acc:MGI:1346051]
ENSMUST00000070863	2	3	28309	0.326159	BC031353	cDNA sequence BC031353 Gene [Source:MGI Symbol;Acc:MGI:2387648]
ENSMUST00000110596	2	3	28309	0.326159	Gm3404	predicted gene 3404 Gene [Source:MGI Symbol;Acc:MGI:3781582]
ENSMUST00000091253	2	3	28309	0.326159	Ipo11	importin 11 Gene [Source:MGI Symbol;Acc:MGI:2442377]
ENSMUST00000056460	2	3	28309	0.326159	Hdhd1a	haloacid dehalogenase-like hydrolase domain containing 1A Gene [Source:MGI Symbol;Acc:MGI:1914615]
ENSMUST00000038373	2	3	28309	0.326159	Zfp81	zinc finger protein 81 Gene [Source:MGI Symbol;Acc:MGI:1890752]
ENSMUST00000112314	2	3	28309	0.326159	Txlng	taxilin gamma Gene [Source:MGI Symbol;Acc:MGI:3590652]
ENSMUST00000111096	2	3	28309	0.326159	Kctd9	potassium channel tetramerisation domain containing 9 Gene [Source:MGI Symbol;Acc:MGI:2145579]
ENSMUST00000091563	2	3	28309	0.326159	6720489N17Rik	RIKEN cDNA 6720489N17 gene Gene [Source:MGI Symbol;Acc:MGI:2443901]
ENSMUST00000001675	2	3	28309	0.326159	Stk38l	serine/threonine kinase 38 like Gene [Source:MGI Symbol;Acc:MGI:1922250]
ENSMUST00000036194	2	3	28309	0.326159	Rep15	RAB15 effector protein Gene [Source:MGI Symbol;Acc:MGI:1913782]
ENSMUST00000003469	2	3	28309	0.326159	Cd79a	CD79A antigen (immunoglobulin-associated alpha) Gene [Source:MGI Symbol;Acc:MGI:101774]
ENSMUST00000088313	2	3	28309	0.326159	Emd	emerin Gene [Source:MGI Symbol;Acc:MGI:108117]
ENSMUST00000021833	2	3	28309	0.326159	NA	NA
ENSMUST00000097819	2	3	28309	0.326159	NA	NA
ENSMUST00000115257	2	3	28309	0.326159	Zcchc12	zinc finger, CCHC domain containing 12 Gene [Source:MGI Symbol;Acc:MGI:1919943]
ENSMUST00000031219	2	3	28309	0.326159	Cdc7	cell division cycle 7 (S. cerevisiae) Gene [Source:MGI Symbol;Acc:MGI:1309511]
ENSMUST00000029859	2	3	28309	0.326159	Asph	aspartate-beta-hydroxylase Gene [Source:MGI Symbol;Acc:MGI:1914186]
ENSMUST00000117268	2	3	28309	0.326159	Otud6b	OTU domain containing 6B Gene [Source:MGI Symbol;Acc:MGI:1919451]
ENSMUST00000036715	2	3	28309	0.326159	Gm3402	predicted gene 3402 Gene [Source:MGI Symbol;Acc:MGI:3781580]
ENSMUST00000022317	2	3	28309	0.326159	5730469M10Rik	RIKEN cDNA 5730469M10 gene Gene [Source:MGI Symbol;Acc:MGI:1917814]
ENSMUST00000093819	2	3	28309	0.326159	Pigb	phosphatidylinositol glycan anchor biosynthesis, class B Gene [Source:MGI Symbol;Acc:MGI:1891825]
ENSMUST00000095135	2	3	28309	0.326159	NA	NA
ENSMUST00000079307	2	3	28309	0.326159	Cntnap4	contactin associated protein-like 4 Gene [Source:MGI Symbol;Acc:MGI:2183572]
ENSMUST00000091321	2	3	28309	0.326159	Smn1	survival motor neuron 1 Gene [Source:MGI Symbol;Acc:MGI:109257]
ENSMUST00000049942	2	3	28309	0.326159	Crem	cAMP responsive element modulator Gene [Source:MGI Symbol;Acc:MGI:88495]
ENSMUST00000122189	2	3	28309	0.326159	Gm5392	predicted gene 5392 Pseudogene [Source:MGI Symbol;Acc:MGI:3642997]
ENSMUST00000106026	2	3	28309	0.326159	CT009755.1
ENSMUST00000092584	2	3	28309	0.326159	Marcks	myristoylated alanine rich protein kinase C substrate Gene [Source:MGI Symbol;Acc:MGI:96907]
ENSMUST00000113141	2	3	28309	0.326159	NA	NA
ENSMUST00000100281	2	3	28309	0.326159	CAAA01128729.1.15794.1
ENSMUST00000088200	2	3	28309	0.326159	Aqp5	aquaporin 5 Gene [Source:MGI Symbol;Acc:MGI:106215]
ENSMUST00000090300	2	3	28309	0.326159	4921513D23Rik	RIKEN cDNA 4921513D23 gene Gene [Source:MGI Symbol;Acc:MGI:2444505]
ENSMUST00000103191	2	3	28309	0.326159	Rpl22	ribosomal protein L22 Gene [Source:MGI Symbol;Acc:MGI:99262]
ENSMUST00000107083	2	3	28309	0.326159	Hook1	hook homolog 1 (Drosophila) Gene [Source:MGI Symbol;Acc:MGI:1925213]
ENSMUST00000115079	6	25	28309	0.332258	Rpl35a	ribosomal protein L35A Gene [Source:MGI Symbol;Acc:MGI:1928894]
ENSMUST00000027056	6	25	28309	0.332258	Prex2	phosphatidylinositol-3,4,5-trisphosphate-dependent Rac exchange factor 2 Gene [Source:MGI Symbol;Acc:MGI:1923385]
ENSMUST00000117648	6	25	28309	0.332258	Ttc3	tetratricopeptide repeat domain 3 Gene [Source:MGI Symbol;Acc:MGI:1276539]
ENSMUST00000119437	4	13	28309	0.3451	Tmed5	transmembrane emp24 protein transport domain containing 5 Gene [Source:MGI Symbol;Acc:MGI:1921586]
ENSMUST00000105442	4	13	28309	0.3451	Sirt1	sirtuin 1 (silent mating type information regulation 2, homolog) 1 (S. cerevisiae) Gene [Source:MGI Symbol;Acc:MGI:2135607]
ENSMUST00000116619	4	13	28309	0.3451	Pram1	PML-RAR alpha-regulated adaptor molecule 1 Gene [Source:MGI Symbol;Acc:MGI:3576625]
ENSMUST00000079841	5	19	28309	0.3451	Gm16409	predicted gene 16409 Pseudogene [Source:MGI Symbol;Acc:MGI:3646708]
ENSMUST00000047981	4	13	28309	0.3451	NA	NA
ENSMUST00000034140	4	13	28309	0.3451	Itfg1	integrin alpha FG-GAP repeat containing 1 Gene [Source:MGI Symbol;Acc:MGI:106419]
ENSMUST00000086525	4	13	28309	0.3451	Eml4	echinoderm microtubule associated protein like 4 Gene [Source:MGI Symbol;Acc:MGI:1926048]
ENSMUST00000042503	4	13	28309	0.3451	Usp6nl	USP6 N-terminal like Gene [Source:MGI Symbol;Acc:MGI:2138893]
ENSMUST00000081331	4	13	28309	0.3451	Gm10044	predicted gene 10044 Gene [Source:MGI Symbol;Acc:MGI:3641749]
ENSMUST00000005394	4	13	28309	0.3451	Ufd1l	ubiquitin fusion degradation 1 like Gene [Source:MGI Symbol;Acc:MGI:109353]
ENSMUST00000109602	4	13	28309	0.3451	Rab1	RAB1, member RAS oncogene family Gene [Source:MGI Symbol;Acc:MGI:97842]
ENSMUST00000118892	4	13	28309	0.3451	Gm13148	predicted gene 13148 Pseudogene [Source:MGI Symbol;Acc:MGI:3651741]
ENSMUST00000073581	4	13	28309	0.3451	Prkg1	protein kinase, cGMP-dependent, type I Gene [Source:MGI Symbol;Acc:MGI:108174]
ENSMUST00000054055	4	13	28309	0.3451	Usp29	ubiquitin specific peptidase 29 Gene [Source:MGI Symbol;Acc:MGI:1888998]
ENSMUST00000108958	4	13	28309	0.3451	Kif3a	kinesin family member 3A Gene [Source:MGI Symbol;Acc:MGI:107689]
ENSMUST00000112085	4	13	28309	0.3451	Tnnt2	troponin T2, cardiac Gene [Source:MGI Symbol;Acc:MGI:104597]
ENSMUST00000072242	4	13	28309	0.3451	Copz1	coatomer protein complex, subunit zeta 1 Gene [Source:MGI Symbol;Acc:MGI:1929063]
ENSMUST00000098494	4	13	28309	0.3451	Gm5610	predicted pseudogene 5610 Pseudogene [Source:MGI Symbol;Acc:MGI:3646624]
ENSMUST00000092132	4	13	28309	0.3451	NA	NA
ENSMUST00000118466	4	13	28309	0.3451	5730469M10Rik	RIKEN cDNA 5730469M10 gene Gene [Source:MGI Symbol;Acc:MGI:1917814]
ENSMUST00000021559	4	13	28309	0.3451	Erh	enhancer of rudimentary homolog (Drosophila) Gene [Source:MGI Symbol;Acc:MGI:108089]
ENSMUST00000096329	4	13	28309	0.3451	Diap2	diaphanous homolog 2 (Drosophila) Gene [Source:MGI Symbol;Acc:MGI:1858500]
ENSMUST00000033547	5	19	28309	0.3451	Pls3	plastin 3 (T-isoform) Gene [Source:MGI Symbol;Acc:MGI:104807]
ENSMUST00000030074	4	13	28309	0.3451	Ugcg	UDP-glucose ceramide glucosyltransferase Gene [Source:MGI Symbol;Acc:MGI:1332243]
ENSMUST00000087025	7	32	28309	0.3451	Rpl7a-ps11	ribosomal protein L7A, speudogene 11 Pseudogene [Source:MGI Symbol;Acc:MGI:3644020]
ENSMUST00000042868	4	13	28309	0.3451	Camk4	calcium/calmodulin-dependent protein kinase IV Gene [Source:MGI Symbol;Acc:MGI:88258]
ENSMUST00000088299	5	19	28309	0.3451	Gm10221	predicted gene 10221 Pseudogene [Source:MGI Symbol;Acc:MGI:3708709]
ENSMUST00000022511	4	13	28309	0.3451	Zmym2	zinc finger, MYM-type 2 Gene [Source:MGI Symbol;Acc:MGI:1923257]
ENSMUST00000085282	7	32	28309	0.3451	Gm8226	predicted gene 8226 Pseudogene [Source:MGI Symbol;Acc:MGI:3643827]
ENSMUST00000100472	5	19	28309	0.3451	Hmgn2	high mobility group nucleosomal binding domain 2 Gene [Source:MGI Symbol;Acc:MGI:96136]
ENSMUST00000078182	4	13	28309	0.3451	Gng8	guanine nucleotide binding protein (G protein), gamma 8 Gene [Source:MGI Symbol;Acc:MGI:109163]
ENSMUST00000027671	4	13	28309	0.3451	Tnnt2	troponin T2, cardiac Gene [Source:MGI Symbol;Acc:MGI:104597]
ENSMUST00000106829	4	13	28309	0.3451	Dab1	disabled homolog 1 (Drosophila) Gene [Source:MGI Symbol;Acc:MGI:108554]
ENSMUST00000098006	4	13	28309	0.3451	Frmd3	FERM domain containing 3 Gene [Source:MGI Symbol;Acc:MGI:2442466]
ENSMUST00000069756	4	13	28309	0.3451	Ocln	occludin Gene [Source:MGI Symbol;Acc:MGI:106183]
ENSMUST00000106361	4	13	28309	0.3451	Olfr1333	olfactory receptor 1333 Gene [Source:MGI Symbol;Acc:MGI:3031167]
ENSMUST00000105980	5	19	28309	0.3451	NA	NA
ENSMUST00000029222	4	13	28309	0.3451	Ccdc39	coiled-coil domain containing 39 Gene [Source:MGI Symbol;Acc:MGI:1289263]
ENSMUST00000030244	4	13	28309	0.3451	Dab1	disabled homolog 1 (Drosophila) Gene [Source:MGI Symbol;Acc:MGI:108554]
ENSMUST00000074318	5	19	28309	0.3451	Tex9	testis expressed gene 9 Gene [Source:MGI Symbol;Acc:MGI:1201610]
ENSMUST00000048180	4	13	28309	0.3451	Plekha1	pleckstrin homology domain containing, family A (phosphoinositide binding specific) member 1 Gene [Source:MGI Symbol;Acc:MGI:2442213]
ENSMUST00000101303	4	13	28309	0.3451	Ppp2r5e	protein phosphatase 2, regulatory subunit B (B56), epsilon isoform Gene [Source:MGI Symbol;Acc:MGI:1349473]
ENSMUST00000022597	4	13	28309	0.3451	Naa16	N(alpha)-acetyltransferase 16, NatA auxiliary subunit Gene [Source:MGI Symbol;Acc:MGI:1914147]
ENSMUST00000029910	4	13	28309	0.3451	Nsmaf	neutral sphingomyelinase (N-SMase) activation associated factor Gene [Source:MGI Symbol;Acc:MGI:1341864]
ENSMUST00000114940	4	13	28309	0.3451	Zfp280c	zinc finger protein 280C Gene [Source:MGI Symbol;Acc:MGI:2387585]
ENSMUST00000106598	5	19	28309	0.3451	Elavl4	ELAV (embryonic lethal, abnormal vision, Drosophila)-like 4 (Hu antigen D) Gene [Source:MGI Symbol;Acc:MGI:107427]
ENSMUST00000112196	4	13	28309	0.3451	NA	NA
ENSMUST00000070524	4	13	28309	0.3451	Tgoln1	trans-golgi network protein Gene [Source:MGI Symbol;Acc:MGI:105080]
ENSMUST00000031625	4	13	28309	0.3451	Arpc1a	actin related protein 2/3 complex, subunit 1A Gene [Source:MGI Symbol;Acc:MGI:1928896]
ENSMUST00000099496	4	13	28309	0.3451	Uimc1	ubiquitin interaction motif containing 1 Gene [Source:MGI Symbol;Acc:MGI:103185]
ENSMUST00000043169	4	13	28309	0.3451	1110018G07Rik	RIKEN cDNA 1110018G07 gene Gene [Source:MGI Symbol;Acc:MGI:1915747]
ENSMUST00000056997	4	13	28309	0.3451	Cdadc1	cytidine and dCMP deaminase domain containing 1 Gene [Source:MGI Symbol;Acc:MGI:1919141]
ENSMUST00000094616	4	13	28309	0.3451	Dbi	diazepam binding inhibitor Gene [Source:MGI Symbol;Acc:MGI:94865]
ENSMUST00000075181	4	13	28309	0.3451	Plekha1	pleckstrin homology domain containing, family A (phosphoinositide binding specific) member 1 Gene [Source:MGI Symbol;Acc:MGI:2442213]
ENSMUST00000035086	5	19	28309	0.3451	Pdcd6ip	programmed cell death 6 interacting protein Gene [Source:MGI Symbol;Acc:MGI:1333753]
ENSMUST00000112292	4	13	28309	0.3451	Dao	D-amino acid oxidase Gene [Source:MGI Symbol;Acc:MGI:94859]
ENSMUST00000040700	5	19	28309	0.3451	Dock9	dedicator of cytokinesis 9 Gene [Source:MGI Symbol;Acc:MGI:106321]
ENSMUST00000054442	4	13	28309	0.3451	N6amt1	N-6 adenine-specific DNA methyltransferase 1 (putative) Gene [Source:MGI Symbol;Acc:MGI:1915018]
ENSMUST00000119662	4	13	28309	0.3451	Armcx4	armadillo repeat containing, X-linked 4 Gene [Source:MGI Symbol;Acc:MGI:2147887]
ENSMUST00000106653	4	13	28309	0.3451	Usp47	ubiquitin specific peptidase 47 Gene [Source:MGI Symbol;Acc:MGI:1922246]
ENSMUST00000064897	4	13	28309	0.3451	Gm9892	predicted gene 9892 Gene [Source:MGI Symbol;Acc:MGI:3701610]
ENSMUST00000108905	5	19	28309	0.3451	Acsl6	acyl-CoA synthetase long-chain family member 6 Gene [Source:MGI Symbol;Acc:MGI:894291]
ENSMUST00000102727	4	13	28309	0.3451	Anxa6	annexin A6 Gene [Source:MGI Symbol;Acc:MGI:88255]
ENSMUST00000110570	4	13	28309	0.3451	Map4k5	mitogen-activated protein kinase kinase kinase kinase 5 Gene [Source:MGI Symbol;Acc:MGI:1925503]
ENSMUST00000121828	4	13	28309	0.3451	Gm15730	predicted gene 15730 Pseudogene [Source:MGI Symbol;Acc:MGI:3783173]
ENSMUST00000041124	4	13	28309	0.3451	Zfp704	zinc finger protein 704 Gene [Source:MGI Symbol;Acc:MGI:2180715]
ENSMUST00000106557	4	13	28309	0.3451	6330503K22Rik	RIKEN cDNA 6330503K22 gene Gene [Source:MGI Symbol;Acc:MGI:2141942]
ENSMUST00000031264	4	13	28309	0.3451	Plac8	placenta-specific 8 Gene [Source:MGI Symbol;Acc:MGI:2445289]
ENSMUST00000002259	4	13	28309	0.3451	Clgn	calmegin Gene [Source:MGI Symbol;Acc:MGI:107472]
ENSMUST00000121018	4	13	28309	0.3451	Cabyr	calcium-binding tyrosine-(Y)-phosphorylation regulated (fibrousheathin 2) Gene [Source:MGI Symbol;Acc:MGI:1918382]
ENSMUST00000119129	4	13	28309	0.3451	Cdon	cell adhesion molecule-related/down-regulated by oncogenes Gene [Source:MGI Symbol;Acc:MGI:1926387]
ENSMUST00000012587	4	13	28309	0.3451	Kif11	kinesin family member 11 Gene [Source:MGI Symbol;Acc:MGI:1098231]
ENSMUST00000053035	4	13	28309	0.3451	Lrrc8e	leucine rich repeat containing 8 family, member E Gene [Source:MGI Symbol;Acc:MGI:1919517]
ENSMUST00000111136	4	13	28309	0.3451	Fbxo3	F-box protein 3 Gene [Source:MGI Symbol;Acc:MGI:1929084]
ENSMUST00000115870	4	13	28309	0.3451	Epc1	enhancer of polycomb homolog 1 (Drosophila) Gene [Source:MGI Symbol;Acc:MGI:1278322]
ENSMUST00000031653	4	13	28309	0.3451	Flt1	FMS-like tyrosine kinase 1 Gene [Source:MGI Symbol;Acc:MGI:95558]
ENSMUST00000034204	4	13	28309	0.3451	Nudt21	nudix (nucleoside diphosphate linked moiety X)-type motif 21 Gene [Source:MGI Symbol;Acc:MGI:1915469]
ENSMUST00000036331	4	13	28309	0.3451	Neu3	neuraminidase 3 Gene [Source:MGI Symbol;Acc:MGI:1355305]
ENSMUST00000045011	4	13	28309	0.3451	Atrip	ATR interacting protein Gene [Source:MGI Symbol;Acc:MGI:1925349]
ENSMUST00000114015	4	13	28309	0.3451	Mtap2	microtubule-associated protein 2 Gene [Source:MGI Symbol;Acc:MGI:97175]
ENSMUST00000071068	4	13	28309	0.3451	Commd1	COMM domain containing 1 Gene [Source:MGI Symbol;Acc:MGI:109474]
ENSMUST00000067186	4	13	28309	0.3451	Mpv17	MpV17 mitochondrial inner membrane protein Gene [Source:MGI Symbol;Acc:MGI:97138]
ENSMUST00000054668	4	13	28309	0.3451	Stau2	staufen (RNA binding protein) homolog 2 (Drosophila) Gene [Source:MGI Symbol;Acc:MGI:1352508]
ENSMUST00000108394	4	13	28309	0.3451	Hnf4g	hepatocyte nuclear factor 4, gamma Gene [Source:MGI Symbol;Acc:MGI:1353604]
ENSMUST00000098842	4	13	28309	0.3451	BC019943	cDNA sequence BC019943 Gene [Source:MGI Symbol;Acc:MGI:2384576]
ENSMUST00000113234	4	13	28309	0.3451	Grsf1	G-rich RNA sequence binding factor 1 Gene [Source:MGI Symbol;Acc:MGI:106479]
ENSMUST00000075242	4	13	28309	0.3451	Hspe1	heat shock protein 1 (chaperonin 10) Gene [Source:MGI Symbol;Acc:MGI:104680]
ENSMUST00000111198	4	13	28309	0.3451	Cd44	CD44 antigen Gene [Source:MGI Symbol;Acc:MGI:88338]
ENSMUST00000114533	4	13	28309	0.3451	Slc4a1ap	solute carrier family 4 (anion exchanger), member 1, adaptor protein Gene [Source:MGI Symbol;Acc:MGI:1196608]
ENSMUST00000114358	4	13	28309	0.3451	St3gal6	ST3 beta-galactoside alpha-2,3-sialyltransferase 6 Gene [Source:MGI Symbol;Acc:MGI:1888707]
ENSMUST00000010319	4	13	28309	0.3451	Prox1	prospero-related homeobox 1 Gene [Source:MGI Symbol;Acc:MGI:97772]
ENSMUST00000025163	4	13	28309	0.3451	H2-Ke2	H2-K region expressed gene 2 Gene [Source:MGI Symbol;Acc:MGI:95908]
ENSMUST00000080139	5	19	28309	0.3451	Dab1	disabled homolog 1 (Drosophila) Gene [Source:MGI Symbol;Acc:MGI:108554]
ENSMUST00000058102	5	19	28309	0.3451	Eif5	eukaryotic translation initiation factor 5 Gene [Source:MGI Symbol;Acc:MGI:95309]
ENSMUST00000051589	4	13	28309	0.3451	Aasdhppt	aminoadipate-semialdehyde dehydrogenase-phosphopantetheinyl transferase Gene [Source:MGI Symbol;Acc:MGI:1914868]
ENSMUST00000105111	3	8	28309	0.366507	F8a	factor 8-associated gene A Gene [Source:MGI Symbol;Acc:MGI:95474]
ENSMUST00000081987	3	8	28309	0.366507	Rpl36a-ps1	ribosomal protein L36A, pseudogene 1 Pseudogene [Source:MGI Symbol;Acc:MGI:3642585]
ENSMUST00000050686	3	8	28309	0.366507	Tmem67	transmembrane protein 67 Gene [Source:MGI Symbol;Acc:MGI:1923928]
ENSMUST00000055352	3	8	28309	0.366507	Fam120b	family with sequence similarity 120, member B Gene [Source:MGI Symbol;Acc:MGI:1914794]
ENSMUST00000040411	3	8	28309	0.366507	Rab42-ps	RAB42, member RAS oncogene family, pseudogene Pseudogene [Source:MGI Symbol;Acc:MGI:2441753]
ENSMUST00000041240	3	8	28309	0.366507	Shisa4	shisa homolog 4 (Xenopus laevis) Gene [Source:MGI Symbol;Acc:MGI:1924802]
ENSMUST00000067018	3	8	28309	0.366507	4922502B01Rik	RIKEN cDNA 4922502B01 gene Gene [Source:MGI Symbol;Acc:MGI:1918204]
ENSMUST00000045043	3	8	28309	0.366507	Ranbp9	RAN binding protein 9 Gene [Source:MGI Symbol;Acc:MGI:1928741]
ENSMUST00000113107	3	8	28309	0.366507	Tada3	transcriptional adaptor 3 Gene [Source:MGI Symbol;Acc:MGI:1915724]
ENSMUST00000024637	3	8	28309	0.366507	Brp44l	brain protein 44-like Gene [Source:MGI Symbol;Acc:MGI:1915240]
ENSMUST00000119991	3	8	28309	0.366507	Stard4	StAR-related lipid transfer (START) domain containing 4 Gene [Source:MGI Symbol;Acc:MGI:2156764]
ENSMUST00000077360	3	8	28309	0.366507	Serpinb6e	serine (or cysteine) peptidase inhibitor, clade B, member 6e Gene [Source:MGI Symbol;Acc:MGI:2667778]
ENSMUST00000098238	3	8	28309	0.366507	Sfrs18	serine/arginine-rich splicing factor 18 Gene [Source:MGI Symbol;Acc:MGI:1913875]
ENSMUST00000043148	3	8	28309	0.366507	Gng12	guanine nucleotide binding protein (G protein), gamma 12 Gene [Source:MGI Symbol;Acc:MGI:1336171]
ENSMUST00000114023	3	8	28309	0.366507	Cryzl1	crystallin, zeta (quinone reductase)-like 1 Gene [Source:MGI Symbol;Acc:MGI:1913859]
ENSMUST00000099574	3	8	28309	0.366507	Gm10791	predicted gene 10791 Gene [Source:MGI Symbol;Acc:MGI:3641949]
ENSMUST00000032946	3	8	28309	0.366507	Rab6	RAB6, member RAS oncogene family Gene [Source:MGI Symbol;Acc:MGI:894313]
ENSMUST00000119314	3	8	28309	0.366507	Gm13915	predicted gene 13915 Pseudogene [Source:MGI Symbol;Acc:MGI:3651613]
ENSMUST00000113201	3	8	28309	0.366507	Armcx1	armadillo repeat containing, X-linked 1 Gene [Source:MGI Symbol;Acc:MGI:1925498]
ENSMUST00000053459	3	8	28309	0.366507	1300014I06Rik	RIKEN cDNA 1300014I06 gene Gene [Source:MGI Symbol;Acc:MGI:1914145]
ENSMUST00000027127	3	8	28309	0.366507	Sf3b1	splicing factor 3b, subunit 1 Gene [Source:MGI Symbol;Acc:MGI:1932339]
ENSMUST00000031419	3	8	28309	0.366507	1500011H22Rik	RIKEN cDNA 1500011H22 gene Gene [Source:MGI Symbol;Acc:MGI:1916198]
ENSMUST00000115078	6	26	28309	0.366507	Rpl35a	ribosomal protein L35A Gene [Source:MGI Symbol;Acc:MGI:1928894]
ENSMUST00000102660	3	8	28309	0.366507	Sestd1	SEC14 and spectrin domains 1 Gene [Source:MGI Symbol;Acc:MGI:1916262]
ENSMUST00000113212	3	8	28309	0.366507	Kcnj13	potassium inwardly-rectifying channel, subfamily J, member 13 Gene [Source:MGI Symbol;Acc:MGI:3781032]
ENSMUST00000111533	3	8	28309	0.366507	NA	NA
ENSMUST00000027978	3	8	28309	0.366507	Ucma	upper zone of growth plate and cartilage matrix associated Gene [Source:MGI Symbol;Acc:MGI:1915777]
ENSMUST00000121229	3	8	28309	0.366507	Gm9855	predicted pseudogene 9855 Pseudogene [Source:MGI Symbol;Acc:MGI:3704357]
ENSMUST00000118732	3	8	28309	0.366507	Spink8	serine peptidase inhibitor, Kazal type 8 Gene [Source:MGI Symbol;Acc:MGI:1925959]
ENSMUST00000108185	3	8	28309	0.366507	Atp11b	ATPase, class VI, type 11B Gene [Source:MGI Symbol;Acc:MGI:1923545]
ENSMUST00000014640	3	8	28309	0.366507	Ankrd28	ankyrin repeat domain 28 Gene [Source:MGI Symbol;Acc:MGI:2145661]
ENSMUST00000110655	3	8	28309	0.366507	Gm2904	predicted pseudogene 2904 Pseudogene [Source:MGI Symbol;Acc:MGI:3781082]
ENSMUST00000100089	3	8	28309	0.366507	Rprm	reprimo, TP53 dependent G2 arrest mediator candidate Gene [Source:MGI Symbol;Acc:MGI:1915124]
ENSMUST00000112258	3	8	28309	0.366507	Mettl5	methyltransferase like 5 Gene [Source:MGI Symbol;Acc:MGI:1922672]
ENSMUST00000120531	3	8	28309	0.366507	Stxbp6	syntaxin binding protein 6 (amisyn) Gene [Source:MGI Symbol;Acc:MGI:2384963]
ENSMUST00000068725	3	8	28309	0.366507	Mosc2	MOCO sulphurase C-terminal domain containing 2 Gene [Source:MGI Symbol;Acc:MGI:1914497]
ENSMUST00000113516	3	8	28309	0.366507	Kdr	kinase insert domain protein receptor Gene [Source:MGI Symbol;Acc:MGI:96683]
ENSMUST00000034464	3	8	28309	0.366507	2310022B05Rik	RIKEN cDNA 2310022B05 gene Gene [Source:MGI Symbol;Acc:MGI:1916801]
ENSMUST00000085572	13	79	28309	0.366507	NA	NA
ENSMUST00000102659	3	8	28309	0.366507	Sestd1	SEC14 and spectrin domains 1 Gene [Source:MGI Symbol;Acc:MGI:1916262]
ENSMUST00000111810	3	8	28309	0.366507	Rgs8	regulator of G-protein signaling 8 Gene [Source:MGI Symbol;Acc:MGI:108408]
ENSMUST00000036136	3	8	28309	0.366507	Colec11	collectin sub-family member 11 Gene [Source:MGI Symbol;Acc:MGI:1918943]
ENSMUST00000061390	3	8	28309	0.366507	Fkrp	fukutin related protein Gene [Source:MGI Symbol;Acc:MGI:2447586]
ENSMUST00000108256	3	8	28309	0.366507	NA	NA
ENSMUST00000094510	3	8	28309	0.366507	Gm13177	predicted gene 13177 Gene [Source:MGI Symbol;Acc:MGI:3650257]
ENSMUST00000044107	3	8	28309	0.366507	Sestd1	SEC14 and spectrin domains 1 Gene [Source:MGI Symbol;Acc:MGI:1916262]
ENSMUST00000098856	3	8	28309	0.366507	NA	NA
ENSMUST00000047715	3	8	28309	0.366507	Mxra7	matrix-remodelling associated 7 Gene [Source:MGI Symbol;Acc:MGI:1914872]
ENSMUST00000061552	3	8	28309	0.366507	C230081A13Rik	RIKEN cDNA C230081A13 gene Gene [Source:MGI Symbol;Acc:MGI:2442366]
ENSMUST00000061739	3	8	28309	0.366507	Pcp4	Purkinje cell protein 4 Gene [Source:MGI Symbol;Acc:MGI:97509]
ENSMUST00000117319	3	8	28309	0.366507	Slc4a1ap	solute carrier family 4 (anion exchanger), member 1, adaptor protein Gene [Source:MGI Symbol;Acc:MGI:1196608]
ENSMUST00000004936	3	8	28309	0.366507	Ccl24	chemokine (C-C motif) ligand 24 Gene [Source:MGI Symbol;Acc:MGI:1928953]
ENSMUST00000029602	3	8	28309	0.366507	Ndst3	N-deacetylase/N-sulfotransferase (heparan glucosaminyl) 3 Gene [Source:MGI Symbol;Acc:MGI:1932544]
ENSMUST00000111781	3	8	28309	0.366507	Mapkapk5	MAP kinase-activated protein kinase 5 Gene [Source:MGI Symbol;Acc:MGI:1333110]
ENSMUST00000066497	3	8	28309	0.366507	Zfp191	zinc finger protein 191 Gene [Source:MGI Symbol;Acc:MGI:1929704]
ENSMUST00000062667	3	8	28309	0.366507	5930403N24Rik	RIKEN cDNA 5930403N24 gene Gene [Source:MGI Symbol;Acc:MGI:2444171]
ENSMUST00000101091	3	8	28309	0.366507	NA	NA
ENSMUST00000052827	3	8	28309	0.366507	Gsbs	G substrate Gene [Source:MGI Symbol;Acc:MGI:1333876]
ENSMUST00000106444	3	8	28309	0.366507	Wbp2	WW domain binding protein 2 Gene [Source:MGI Symbol;Acc:MGI:104709]
ENSMUST00000003215	3	8	28309	0.366507	Pafah1b2	platelet-activating factor acetylhydrolase, isoform 1b, subunit 2 Gene [Source:MGI Symbol;Acc:MGI:108415]
ENSMUST00000114735	3	8	28309	0.366507	Arhgef6	Rac/Cdc42 guanine nucleotide exchange factor (GEF) 6 Gene [Source:MGI Symbol;Acc:MGI:1920591]
ENSMUST00000099933	3	8	28309	0.366507	NA	NA
ENSMUST00000088401	3	8	28309	0.366507	NA	NA
ENSMUST00000122065	3	8	28309	0.366507	Cgnl1	cingulin-like 1 Gene [Source:MGI Symbol;Acc:MGI:1915428]
ENSMUST00000102525	3	8	28309	0.366507	Arpc3	actin related protein 2/3 complex, subunit 3 Gene [Source:MGI Symbol;Acc:MGI:1928375]
ENSMUST00000059775	3	8	28309	0.366507	Tgif1	TGFB-induced factor homeobox 1 Gene [Source:MGI Symbol;Acc:MGI:1194497]
ENSMUST00000067924	3	8	28309	0.366507	Lrrc8c	leucine rich repeat containing 8 family, member C Gene [Source:MGI Symbol;Acc:MGI:2140839]
ENSMUST00000073363	3	8	28309	0.366507	Amtn	amelotin Gene [Source:MGI Symbol;Acc:MGI:1918671]
ENSMUST00000092627	3	8	28309	0.366507	9330159F19Rik	RIKEN cDNA 9330159F19 gene Gene [Source:MGI Symbol;Acc:MGI:3036239]
ENSMUST00000106362	3	8	28309	0.366507	NA	NA
ENSMUST00000105432	3	8	28309	0.366507	Tfam	transcription factor A, mitochondrial Gene [Source:MGI Symbol;Acc:MGI:107810]
ENSMUST00000033277	3	8	28309	0.366507	2310008H09Rik	RIKEN cDNA 2310008H09 gene Gene [Source:MGI Symbol;Acc:MGI:1913606]
ENSMUST00000056198	3	8	28309	0.366507	4921523A10Rik	RIKEN cDNA 4921523A10 gene Gene [Source:MGI Symbol;Acc:MGI:3612067]
ENSMUST00000082219	3	8	28309	0.366507	Chi3l4	chitinase 3-like 4 Gene [Source:MGI Symbol;Acc:MGI:1341098]
ENSMUST00000110460	3	8	28309	0.366507	Hmgn4	high mobility group nucleosomal binding domain 4 Pseudogene [Source:MGI Symbol;Acc:MGI:3783162]
ENSMUST00000092674	3	8	28309	0.366507	Hbs1l	Hbs1-like (S. cerevisiae) Gene [Source:MGI Symbol;Acc:MGI:1891704]
ENSMUST00000120010	3	8	28309	0.366507	Gm13234	predicted gene 13234 Pseudogene [Source:MGI Symbol;Acc:MGI:3649926]
ENSMUST00000059472	3	8	28309	0.366507	Mat2a	methionine adenosyltransferase II, alpha Gene [Source:MGI Symbol;Acc:MGI:2443731]
ENSMUST00000027059	3	8	28309	0.366507	Tcfap2b	transcription factor AP-2 beta Gene [Source:MGI Symbol;Acc:MGI:104672]
ENSMUST00000097679	3	8	28309	0.366507	NA	NA
ENSMUST00000068755	3	8	28309	0.366507	Bhlhb9	basic helix-loop-helix domain containing, class B9 Gene [Source:MGI Symbol;Acc:MGI:1917487]
ENSMUST00000020257	3	8	28309	0.366507	Sirt1	sirtuin 1 (silent mating type information regulation 2, homolog) 1 (S. cerevisiae) Gene [Source:MGI Symbol;Acc:MGI:2135607]
ENSMUST00000117099	3	8	28309	0.366507	Chaf1b	chromatin assembly factor 1, subunit B (p60) Gene [Source:MGI Symbol;Acc:MGI:1314881]
ENSMUST00000116342	3	8	28309	0.366507	NA	NA
ENSMUST00000027146	3	8	28309	0.366507	Ikzf2	IKAROS family zinc finger 2 Gene [Source:MGI Symbol;Acc:MGI:1342541]
ENSMUST00000058230	3	8	28309	0.366507	Ensa	endosulfine alpha Gene [Source:MGI Symbol;Acc:MGI:1891189]
ENSMUST00000054780	3	8	28309	0.366507	BC011426	cDNA sequence BC011426 Gene [Source:MGI Symbol;Acc:MGI:2385058]
ENSMUST00000057844	3	8	28309	0.366507	B230219D22Rik	RIKEN cDNA B230219D22 gene Gene [Source:MGI Symbol;Acc:MGI:1925771]
ENSMUST00000039419	3	8	28309	0.366507	Igsf10	immunoglobulin superfamily, member 10 Gene [Source:MGI Symbol;Acc:MGI:1923481]
ENSMUST00000045540	3	8	28309	0.366507	Socs7	suppressor of cytokine signaling 7 Gene [Source:MGI Symbol;Acc:MGI:2651588]
ENSMUST00000105310	3	8	28309	0.366507	NA	NA
ENSMUST00000026997	3	8	28309	0.366507	Uimc1	ubiquitin interaction motif containing 1 Gene [Source:MGI Symbol;Acc:MGI:103185]
ENSMUST00000107061	3	8	28309	0.366507	Nfia	nuclear factor I/A Gene [Source:MGI Symbol;Acc:MGI:108056]
ENSMUST00000110980	3	8	28309	0.366507	Pilra	paired immunoglobin-like type 2 receptor alpha Gene [Source:MGI Symbol;Acc:MGI:2450529]
ENSMUST00000112572	3	8	28309	0.366507	Kctd12b	potassium channel tetramerisation domain containing 12b Gene [Source:MGI Symbol;Acc:MGI:2444667]
ENSMUST00000020804	3	8	28309	0.366507	Gdpd1	glycerophosphodiester phosphodiesterase domain containing 1 Gene [Source:MGI Symbol;Acc:MGI:1913819]
ENSMUST00000018343	3	8	28309	0.366507	Trove2	TROVE domain family, member 2 Gene [Source:MGI Symbol;Acc:MGI:106652]
ENSMUST00000087395	3	8	28309	0.366507	Kcnip4	Kv channel interacting protein 4 Gene [Source:MGI Symbol;Acc:MGI:1933131]
ENSMUST00000028909	3	8	28309	0.366507	Snx5	sorting nexin 5 Gene [Source:MGI Symbol;Acc:MGI:1916428]
ENSMUST00000039841	6	26	28309	0.366507	4932438A13Rik	RIKEN cDNA 4932438A13 gene Gene [Source:MGI Symbol;Acc:MGI:2444631]
ENSMUST00000091258	3	8	28309	0.366507	NA	NA
ENSMUST00000119968	3	8	28309	0.366507	Mrpl24	mitochondrial ribosomal protein L24 Gene [Source:MGI Symbol;Acc:MGI:1914957]
ENSMUST00000110466	3	8	28309	0.366507	NA	NA
ENSMUST00000048687	3	8	28309	0.366507	Wbp5	WW domain binding protein 5 Gene [Source:MGI Symbol;Acc:MGI:109567]
ENSMUST00000062804	3	8	28309	0.366507	Fut8	fucosyltransferase 8 Gene [Source:MGI Symbol;Acc:MGI:1858901]
ENSMUST00000025639	3	8	28309	0.366507	Ccdc86	coiled-coil domain containing 86 Gene [Source:MGI Symbol;Acc:MGI:1277220]
ENSMUST00000071118	3	8	28309	0.366507	Gm6169	predicted gene 6169 Pseudogene [Source:MGI Symbol;Acc:MGI:3646298]
ENSMUST00000080141	3	8	28309	0.366507	Tmem117	transmembrane protein 117 Gene [Source:MGI Symbol;Acc:MGI:2444580]
ENSMUST00000115201	8	40	28309	0.366507	Dlg1	discs, large homolog 1 (Drosophila) Gene [Source:MGI Symbol;Acc:MGI:107231]
ENSMUST00000034785	3	8	28309	0.366507	Glce	glucuronyl C5-epimerase Gene [Source:MGI Symbol;Acc:MGI:2136405]
ENSMUST00000068437	3	8	28309	0.366507	Smyd3	SET and MYND domain containing 3 Gene [Source:MGI Symbol;Acc:MGI:1916976]
ENSMUST00000119865	3	8	28309	0.366507	Mtfr1	mitochondrial fission regulator 1 Gene [Source:MGI Symbol;Acc:MGI:1914722]
ENSMUST00000008451	3	8	28309	0.366507	1700109H08Rik	RIKEN cDNA 1700109H08 gene Gene [Source:MGI Symbol;Acc:MGI:1924286]
ENSMUST00000032200	3	8	28309	0.366507	Slc6a12	solute carrier family 6 (neurotransmitter transporter, betaine/GABA), member 12 Gene [Source:MGI Symbol;Acc:MGI:95628]
ENSMUST00000119546	3	8	28309	0.366507	H3f3a-ps1	H3 histone, family 3A, pseudogene 1 Pseudogene [Source:MGI Symbol;Acc:MGI:1101782]
ENSMUST00000060251	3	8	28309	0.366507	Higd1a	HIG1 domain family, member 1A Gene [Source:MGI Symbol;Acc:MGI:1930666]
ENSMUST00000049272	3	8	28309	0.366507	Hoxb5	homeobox B5 Gene [Source:MGI Symbol;Acc:MGI:96186]
ENSMUST00000028106	3	8	28309	0.366507	Itga8	integrin alpha 8 Gene [Source:MGI Symbol;Acc:MGI:109442]
ENSMUST00000110340	3	8	28309	0.366507	AC132391.1	Cytochrome c oxidase assembly protein COX16 homolog, mitochondrial [Source:UniProtKB/Swiss-Prot;Acc:Q9CR63]
ENSMUST00000076263	3	8	28309	0.366507	Olfr1076	olfactory receptor 1076 Gene [Source:MGI Symbol;Acc:MGI:3030910]
ENSMUST00000050440	3	8	28309	0.366507	NA	NA
ENSMUST00000062474	3	8	28309	0.366507	Cyp8b1	cytochrome P450, family 8, subfamily b, polypeptide 1 Gene [Source:MGI Symbol;Acc:MGI:1338044]
ENSMUST00000111894	3	8	28309	0.366507	C030030A07Rik	RIKEN cDNA C030030A07 gene Gene [Source:MGI Symbol;Acc:MGI:2443451]
ENSMUST00000046212	3	8	28309	0.366507	Slc16a1	solute carrier family 16 (monocarboxylic acid transporters), member 1 Gene [Source:MGI Symbol;Acc:MGI:106013]
ENSMUST00000106718	3	8	28309	0.366507	Ccdc46	coiled-coil domain containing 46 Gene [Source:MGI Symbol;Acc:MGI:1923673]
ENSMUST00000058487	3	8	28309	0.366507	NA	NA
ENSMUST00000050872	3	8	28309	0.366507	Nfib	nuclear factor I/B Gene [Source:MGI Symbol;Acc:MGI:103188]
ENSMUST00000110654	3	8	28309	0.366507	Gm5456	predicted gene 5456 Pseudogene [Source:MGI Symbol;Acc:MGI:3643775]
ENSMUST00000045466	3	8	28309	0.366507	Zfp644	zinc finger protein 644 Gene [Source:MGI Symbol;Acc:MGI:1277212]
ENSMUST00000000127	3	8	28309	0.366507	Wnt3	wingless-related MMTV integration site 3 Gene [Source:MGI Symbol;Acc:MGI:98955]
ENSMUST00000102747	3	8	28309	0.366507	39142	membrane-associated ring finger (C3HC4) 7 Gene [Source:MGI Symbol;Acc:MGI:1931053]
ENSMUST00000109724	3	8	28309	0.366507	Cbfa2t2	core-binding factor, runt domain, alpha subunit 2, translocated to, 2 (human) Gene [Source:MGI Symbol;Acc:MGI:1333833]
ENSMUST00000117813	3	8	28309	0.366507	Rpl13-ps5	ribosomal protein L13, pseudogene 5 Pseudogene [Source:MGI Symbol;Acc:MGI:3648527]
ENSMUST00000109610	3	8	28309	0.366507	Cast	calpastatin Gene [Source:MGI Symbol;Acc:MGI:1098236]
ENSMUST00000064225	3	8	28309	0.366507	Rgs17	regulator of G-protein signaling 17 Gene [Source:MGI Symbol;Acc:MGI:1927469]
ENSMUST00000055341	3	8	28309	0.366507	Gfod1	glucose-fructose oxidoreductase domain containing 1 Gene [Source:MGI Symbol;Acc:MGI:2145304]
ENSMUST00000113286	3	8	28309	0.366507	Cstf2	cleavage stimulation factor, 3' pre-RNA subunit 2 Gene [Source:MGI Symbol;Acc:MGI:1343054]
ENSMUST00000115393	3	8	28309	0.366507	Slc9a7	solute carrier family 9 (sodium/hydrogen exchanger), member 7 Gene [Source:MGI Symbol;Acc:MGI:2444530]
ENSMUST00000092956	3	8	28309	0.366507	Ahnak	AHNAK nucleoprotein (desmoyokin) Gene [Source:MGI Symbol;Acc:MGI:1316648]
ENSMUST00000046233	3	8	28309	0.366507	Bbox1	butyrobetaine (gamma), 2-oxoglutarate dioxygenase 1 (gamma-butyrobetaine hydroxylase) Gene [Source:MGI Symbol;Acc:MGI:1891372]
ENSMUST00000100295	3	8	28309	0.366507	Tm9sf2	transmembrane 9 superfamily member 2 Gene [Source:MGI Symbol;Acc:MGI:1915309]
ENSMUST00000098197	3	8	28309	0.366507	Olfr618	olfactory receptor 618 Gene [Source:MGI Symbol;Acc:MGI:3030452]
ENSMUST00000097228	3	8	28309	0.366507	Dio3	deiodinase, iodothyronine type III Gene [Source:MGI Symbol;Acc:MGI:1306782]
ENSMUST00000114268	3	8	28309	0.366507	Snca	synuclein, alpha Gene [Source:MGI Symbol;Acc:MGI:1277151]
ENSMUST00000107599	3	8	28309	0.366507	NA	NA
ENSMUST00000032374	3	8	28309	0.366507	Kcnj8	potassium inwardly-rectifying channel, subfamily J, member 8 Gene [Source:MGI Symbol;Acc:MGI:1100508]
ENSMUST00000034499	3	8	28309	0.366507	Dcun1d5	DCN1, defective in cullin neddylation 1, domain containing 5 (S. cerevisiae) Gene [Source:MGI Symbol;Acc:MGI:1924113]
ENSMUST00000119341	3	8	28309	0.366507	Cap2	CAP, adenylate cyclase-associated protein, 2 (yeast) Gene [Source:MGI Symbol;Acc:MGI:1914502]
ENSMUST00000065308	3	8	28309	0.366507	Azin1	antizyme inhibitor 1 Gene [Source:MGI Symbol;Acc:MGI:1859169]
ENSMUST00000024706	3	8	28309	0.366507	Pla2g7	phospholipase A2, group VII (platelet-activating factor acetylhydrolase, plasma) Gene [Source:MGI Symbol;Acc:MGI:1351327]
ENSMUST00000110113	3	8	28309	0.366507	Kcnk10	potassium channel, subfamily K, member 10 Gene [Source:MGI Symbol;Acc:MGI:1919508]
ENSMUST00000070774	3	8	28309	0.366507	Gabpb2	GA repeat binding protein, beta 2 Gene [Source:MGI Symbol;Acc:MGI:95612]
ENSMUST00000040538	3	8	28309	0.366507	Sccpdh	saccharopine dehydrogenase (putative) Gene [Source:MGI Symbol;Acc:MGI:1924486]
ENSMUST00000097900	3	8	28309	0.366507	Pabpc4	poly(A) binding protein, cytoplasmic 4 Gene [Source:MGI Symbol;Acc:MGI:2385206]
ENSMUST00000108186	3	8	28309	0.366507	Atp11b	ATPase, class VI, type 11B Gene [Source:MGI Symbol;Acc:MGI:1923545]
ENSMUST00000105439	3	8	28309	0.366507	Lrrtm3	leucine rich repeat transmembrane neuronal 3 Gene [Source:MGI Symbol;Acc:MGI:2389177]
ENSMUST00000106874	3	8	28309	0.366507	NA	NA
ENSMUST00000084915	3	8	28309	0.366507	Asph	aspartate-beta-hydroxylase Gene [Source:MGI Symbol;Acc:MGI:1914186]
ENSMUST00000114099	3	8	28309	0.366507	Otop1	otopetrin 1 Gene [Source:MGI Symbol;Acc:MGI:2388363]
ENSMUST00000026887	3	8	28309	0.366507	Atp5c1	ATP synthase, H+ transporting, mitochondrial F1 complex, gamma polypeptide 1 Gene [Source:MGI Symbol;Acc:MGI:1261437]
ENSMUST00000107289	3	8	28309	0.366507	Ptprd	protein tyrosine phosphatase, receptor type, D Gene [Source:MGI Symbol;Acc:MGI:97812]
ENSMUST00000030720	3	8	28309	0.366507	Yrdc	yrdC domain containing (E.coli) Gene [Source:MGI Symbol;Acc:MGI:2387201]
ENSMUST00000107796	3	8	28309	0.366507	Mcart1	mitochondrial carrier triple repeat 1 Gene [Source:MGI Symbol;Acc:MGI:2684984]
ENSMUST00000101005	3	8	28309	0.366507	Wnk1	WNK lysine deficient protein kinase 1 Gene [Source:MGI Symbol;Acc:MGI:2442092]
ENSMUST00000108074	3	8	28309	0.366507	4931406P16Rik	RIKEN cDNA 4931406P16 gene Gene [Source:MGI Symbol;Acc:MGI:1924311]
ENSMUST00000120473	3	8	28309	0.366507	0610037L13Rik	RIKEN cDNA 0610037L13 gene Gene [Source:MGI Symbol;Acc:MGI:1921348]
ENSMUST00000079062	3	8	28309	0.366507	NA	NA
ENSMUST00000108293	3	8	28309	0.366507	Tmem67	transmembrane protein 67 Gene [Source:MGI Symbol;Acc:MGI:1923928]
ENSMUST00000112968	3	8	28309	0.366507	Paqr3	progestin and adipoQ receptor family member III Gene [Source:MGI Symbol;Acc:MGI:2679683]
ENSMUST00000019909	3	8	28309	0.366507	Rgs17	regulator of G-protein signaling 17 Gene [Source:MGI Symbol;Acc:MGI:1927469]
ENSMUST00000105981	5	20	28309	0.384098	Epb4.1	erythrocyte protein band 4.1 Gene [Source:MGI Symbol;Acc:MGI:95401]
ENSMUST00000076708	5	20	28309	0.384098	Rps16-ps2	ribosomal protein S16, pseudogene 2 Pseudogene [Source:MGI Symbol;Acc:MGI:3704259]
ENSMUST00000118786	5	20	28309	0.384098	Gm14494	predicted gene 14494 Pseudogene [Source:MGI Symbol;Acc:MGI:3704210]
ENSMUST00000114009	5	20	28309	0.384098	Unc80	unc-80 homolog (C. elegans) Gene [Source:MGI Symbol;Acc:MGI:2652882]
ENSMUST00000082226	5	20	28309	0.384098	Lrba	LPS-responsive beige-like anchor Gene [Source:MGI Symbol;Acc:MGI:1933162]
ENSMUST00000025921	5	20	28309	0.384098	Mark2	MAP/microtubule affinity-regulating kinase 2 Gene [Source:MGI Symbol;Acc:MGI:99638]
ENSMUST00000047122	5	20	28309	0.384098	Dnm1l	dynamin 1-like Gene [Source:MGI Symbol;Acc:MGI:1921256]
ENSMUST00000026897	5	20	28309	0.384098	Slco3a1	solute carrier organic anion transporter family, member 3a1 Gene [Source:MGI Symbol;Acc:MGI:1351867]
ENSMUST00000069673	5	20	28309	0.384098	Gpatch8	G patch domain containing 8 Gene [Source:MGI Symbol;Acc:MGI:1918667]
ENSMUST00000115700	5	20	28309	0.384098	Ube2l3	ubiquitin-conjugating enzyme E2L 3 Gene [Source:MGI Symbol;Acc:MGI:109240]
ENSMUST00000111448	5	20	28309	0.384098	Celf1	CUGBP, Elav-like family member 1 Gene [Source:MGI Symbol;Acc:MGI:1342295]
ENSMUST00000070785	5	20	28309	0.384098	Zkscan3	zinc finger with KRAB and SCAN domains 3 Gene [Source:MGI Symbol;Acc:MGI:1919989]
ENSMUST00000115207	8	41	28309	0.389391	Dlg1	discs, large homolog 1 (Drosophila) Gene [Source:MGI Symbol;Acc:MGI:107231]
ENSMUST00000109012	4	14	28309	0.391659	Gm6710	predicted gene 6710 Gene [Source:MGI Symbol;Acc:MGI:3779623]
ENSMUST00000018842	4	14	28309	0.391659	Lhx1	LIM homeobox protein 1 Gene [Source:MGI Symbol;Acc:MGI:99783]
ENSMUST00000112431	4	14	28309	0.391659	Cobll1	Cobl-like 1 Gene [Source:MGI Symbol;Acc:MGI:2442894]
ENSMUST00000106438	4	14	28309	0.391659	Fnbp1l	formin binding protein 1-like Gene [Source:MGI Symbol;Acc:MGI:1925642]
ENSMUST00000109058	4	14	28309	0.391659	Gm14391	predicted gene 14391 Gene [Source:MGI Symbol;Acc:MGI:3709324]
ENSMUST00000025218	4	14	28309	0.391659	Etf1	eukaryotic translation termination factor 1 Gene [Source:MGI Symbol;Acc:MGI:2385071]
ENSMUST00000033470	4	14	28309	0.391659	Rbmx	RNA binding motif protein, X chromosome Gene [Source:MGI Symbol;Acc:MGI:1343044]
ENSMUST00000036362	4	14	28309	0.391659	Lat2	linker for activation of T cells family, member 2 Gene [Source:MGI Symbol;Acc:MGI:1926479]
ENSMUST00000110381	4	14	28309	0.391659	Lrp2bp	Lrp2 binding protein Gene [Source:MGI Symbol;Acc:MGI:1914870]
ENSMUST00000097715	4	14	28309	0.391659	Mrpl43	mitochondrial ribosomal protein L43 Gene [Source:MGI Symbol;Acc:MGI:2137229]
ENSMUST00000045153	4	14	28309	0.391659	Pik3ip1	phosphoinositide-3-kinase interacting protein 1 Gene [Source:MGI Symbol;Acc:MGI:1917016]
ENSMUST00000047322	4	14	28309	0.391659	Rbbp8	retinoblastoma binding protein 8 Gene [Source:MGI Symbol;Acc:MGI:2442995]
ENSMUST00000030788	4	14	28309	0.391659	Hes3	hairy and enhancer of split 3 (Drosophila) Gene [Source:MGI Symbol;Acc:MGI:104877]
ENSMUST00000081265	4	14	28309	0.391659	Ebf1	early B-cell factor 1 Gene [Source:MGI Symbol;Acc:MGI:95275]
ENSMUST00000102652	4	14	28309	0.391659	Pde1a	phosphodiesterase 1A, calmodulin-dependent Gene [Source:MGI Symbol;Acc:MGI:1201792]
ENSMUST00000049999	4	14	28309	0.391659	Spin2	spindlin family, member 2 Gene [Source:MGI Symbol;Acc:MGI:3605548]
ENSMUST00000097590	4	14	28309	0.391659	Lars	leucyl-tRNA synthetase Gene [Source:MGI Symbol;Acc:MGI:1913808]
ENSMUST00000076169	4	14	28309	0.391659	Mtx3	metaxin 3 Gene [Source:MGI Symbol;Acc:MGI:2686040]
ENSMUST00000072219	4	14	28309	0.391659	Olfr1480	olfactory receptor 1480 Gene [Source:MGI Symbol;Acc:MGI:3031314]
ENSMUST00000114789	4	14	28309	0.391659	Stxbp5l	syntaxin binding protein 5-like Gene [Source:MGI Symbol;Acc:MGI:2443815]
ENSMUST00000028652	4	14	28309	0.391659	Slc28a2	solute carrier family 28 (sodium-coupled nucleoside transporter), member 2 Gene [Source:MGI Symbol;Acc:MGI:1913105]
ENSMUST00000097626	4	14	28309	0.391659	Brd8	bromodomain containing 8 Gene [Source:MGI Symbol;Acc:MGI:1925906]
ENSMUST00000054674	4	14	28309	0.391659	Hjurp	Holliday junction recognition protein Gene [Source:MGI Symbol;Acc:MGI:2685821]
ENSMUST00000105970	4	14	28309	0.391659	Epb4.1	erythrocyte protein band 4.1 Gene [Source:MGI Symbol;Acc:MGI:95401]
ENSMUST00000036811	4	14	28309	0.391659	Ctnnd1	catenin (cadherin associated protein), delta 1 Gene [Source:MGI Symbol;Acc:MGI:105100]
[truncated: 694 more rows]

## Sheet: Down_regulated_90min
Transcript ID (Ensembl)	Q&T	T	Q	p-value	Gene Symbol	Gene Description
ENSMUST00000102888	14	16	27543	2.12455e-09	Camk2a	calcium/calmodulin-dependent protein kinase II alpha Gene [Source:MGI Symbol;Acc:MGI:88256]
ENSMUST00000025519	14	16	27543	2.12455e-09	Camk2a	calcium/calmodulin-dependent protein kinase II alpha Gene [Source:MGI Symbol;Acc:MGI:88256]
ENSMUST00000108817	15	18	27543	2.12455e-09	Hist3h2a	histone cluster 3, H2a Gene [Source:MGI Symbol;Acc:MGI:2448458]
ENSMUST00000047697	16	26	27543	2.28829e-07	Trim17	tripartite motif-containing 17 Gene [Source:MGI Symbol;Acc:MGI:1861440]
ENSMUST00000027195	10	10	27543	2.28829e-07	NA	NA
ENSMUST00000004378	12	15	27543	3.81016e-07	Eno2	enolase 2, gamma neuronal Gene [Source:MGI Symbol;Acc:MGI:95394]
ENSMUST00000112598	21	46	27543	3.81016e-07	Rpl15	ribosomal protein L15 Gene [Source:MGI Symbol;Acc:MGI:1913730]
ENSMUST00000073637	14	23	27543	2.60463e-06	Gm7331	predicted gene 7331 Pseudogene [Source:MGI Symbol;Acc:MGI:3644702]
ENSMUST00000120197	11	14	27543	2.60463e-06	Gm12502	predicted gene 12502 Pseudogene [Source:MGI Symbol;Acc:MGI:3650307]
ENSMUST00000089430	14	24	27543	4.65648e-06	Gm11808	predicted gene 11808 Gene [Source:MGI Symbol;Acc:MGI:3649356]
ENSMUST00000004316	14	24	27543	4.65648e-06	Psap	prosaposin Gene [Source:MGI Symbol;Acc:MGI:97783]
ENSMUST00000101586	9	10	27543	7.69434e-06	Camk2b	calcium/calmodulin-dependent protein kinase II, beta Gene [Source:MGI Symbol;Acc:MGI:88257]
ENSMUST00000117288	11	16	27543	1.81794e-05	Gm15427	predicted pseudogene 15427 Pseudogene [Source:MGI Symbol;Acc:MGI:3642341]
ENSMUST00000021506	9	11	27543	3.10787e-05	Serpina3n	serine (or cysteine) peptidase inhibitor, clade A, member 3N Gene [Source:MGI Symbol;Acc:MGI:105045]
ENSMUST00000004480	9	11	27543	3.10787e-05	Sst	somatostatin Gene [Source:MGI Symbol;Acc:MGI:98326]
ENSMUST00000096987	10	14	27543	3.28951e-05	38596	septin 5 Gene [Source:MGI Symbol;Acc:MGI:1195461]
ENSMUST00000121009	11	17	27543	3.28951e-05	Gm14049	predicted gene 14049 Pseudogene [Source:MGI Symbol;Acc:MGI:3650777]
ENSMUST00000089805	10	14	27543	3.28951e-05	Dclk1	doublecortin-like kinase 1 Gene [Source:MGI Symbol;Acc:MGI:1330861]
ENSMUST00000041045	11	17	27543	3.28951e-05	H2afz	H2A histone family, member Z Gene [Source:MGI Symbol;Acc:MGI:1888388]
ENSMUST00000062674	13	24	27543	3.28951e-05	Rps15	ribosomal protein S15 Gene [Source:MGI Symbol;Acc:MGI:98117]
ENSMUST00000120718	8	9	27543	4.14598e-05	Akt2-ps	thymoma viral proto-oncogene 2, pseudogene Pseudogene [Source:MGI Symbol;Acc:MGI:108506]
ENSMUST00000106138	8	9	27543	4.14598e-05	Prkacb	protein kinase, cAMP dependent, catalytic, beta Gene [Source:MGI Symbol;Acc:MGI:97594]
ENSMUST00000119110	11	18	27543	6.29105e-05	Gm12447	predicted gene 12447 Pseudogene [Source:MGI Symbol;Acc:MGI:3650247]
ENSMUST00000074556	9	12	27543	6.38727e-05	H2afj	H2A histone family, member J Gene [Source:MGI Symbol;Acc:MGI:3606192]
ENSMUST00000074513	19	52	27543	6.38727e-05	Gm15454	predicted gene 15454 Pseudogene [Source:MGI Symbol;Acc:MGI:3644262]
ENSMUST00000107105	10	15	27543	6.38727e-05	Rundc3a	RUN domain containing 3A Gene [Source:MGI Symbol;Acc:MGI:1858752]
ENSMUST00000051435	9	12	27543	6.38727e-05	Zfp418	zinc finger protein 418 Gene [Source:MGI Symbol;Acc:MGI:2444763]
ENSMUST00000119920	10	15	27543	6.38727e-05	Gm13239	predicted gene 13239 Pseudogene [Source:MGI Symbol;Acc:MGI:3650779]
ENSMUST00000117757	15	34	27543	6.59363e-05	Gapdh	glyceraldehyde-3-phosphate dehydrogenase Gene [Source:MGI Symbol;Acc:MGI:95640]
ENSMUST00000101008	15	34	27543	6.59363e-05	Gm5559	predicted gene 5559 Pseudogene [Source:MGI Symbol;Acc:MGI:3779498]
ENSMUST00000105465	11	19	27543	0.00010163	Psap	prosaposin Gene [Source:MGI Symbol;Acc:MGI:97783]
ENSMUST00000085917	8	10	27543	0.000130976	Akt2	thymoma viral proto-oncogene 2 Gene [Source:MGI Symbol;Acc:MGI:104874]
ENSMUST00000034097	9	13	27543	0.000145953	Got2	glutamate oxaloacetate transaminase 2, mitochondrial Gene [Source:MGI Symbol;Acc:MGI:95792]
ENSMUST00000019198	9	13	27543	0.000145953	Fis1	fission 1 (mitochondrial outer membrane) homolog (yeast) Gene [Source:MGI Symbol;Acc:MGI:1913687]
ENSMUST00000073139	9	13	27543	0.000145953	Ndrg4	N-myc downstream regulated gene 4 Gene [Source:MGI Symbol;Acc:MGI:2384590]
ENSMUST00000121621	11	20	27543	0.000173486	Gm12726	predicted gene 12726 Pseudogene [Source:MGI Symbol;Acc:MGI:3649291]
ENSMUST00000106649	11	20	27543	0.000173486	Mical2	microtubule associated monoxygenase, calponin and LIM domain containing 2 Gene [Source:MGI Symbol;Acc:MGI:2444947]
ENSMUST00000093258	13	28	27543	0.000182715	NA	NA
ENSMUST00000095723	9	14	27543	0.000294266	Gm9034	predicted pseudogene 9034 Pseudogene [Source:MGI Symbol;Acc:MGI:3643526]
ENSMUST00000099086	11	21	27543	0.000294266	Gm8325	predicted pseudogene 8325 Pseudogene [Source:MGI Symbol;Acc:MGI:3644852]
ENSMUST00000108497	9	14	27543	0.000294266	Ap2s1	adaptor-related protein complex 2, sigma 1 subunit Gene [Source:MGI Symbol;Acc:MGI:2141861]
ENSMUST00000077577	11	21	27543	0.000294266	Tuba1b	tubulin, alpha 1B Gene [Source:MGI Symbol;Acc:MGI:107804]
ENSMUST00000121655	8	11	27543	0.000294266	Got2-ps1	glutamate oxaloacetate transaminase 2, mitochondrial, pseudogene 1 Pseudogene [Source:MGI Symbol;Acc:MGI:104721]
ENSMUST00000111664	9	14	27543	0.000294266	Tmx2	thioredoxin-related transmembrane protein 2 Gene [Source:MGI Symbol;Acc:MGI:1914208]
ENSMUST00000063673	8	11	27543	0.000294266	NA	NA
ENSMUST00000117515	8	11	27543	0.000294266	Gm13352	predicted gene 13352 Pseudogene [Source:MGI Symbol;Acc:MGI:3651070]
ENSMUST00000054478	8	11	27543	0.000294266	NA	NA
ENSMUST00000119715	11	21	27543	0.000294266	Gm5937	predicted gene 5937 Pseudogene [Source:MGI Symbol;Acc:MGI:3648844]
ENSMUST00000109813	10	18	27543	0.000410737	Camk2b	calcium/calmodulin-dependent protein kinase II, beta Gene [Source:MGI Symbol;Acc:MGI:88257]
ENSMUST00000105222	12	26	27543	0.000432367	Gm10327	predicted pseudogene 10327 Pseudogene [Source:MGI Symbol;Acc:MGI:3704356]
ENSMUST00000082002	11	22	27543	0.000435902	Gm11517	predicted gene 11517 Pseudogene [Source:MGI Symbol;Acc:MGI:3650064]
ENSMUST00000109207	11	22	27543	0.000435902	Ube2v1	ubiquitin-conjugating enzyme E2 variant 1 Gene [Source:MGI Symbol;Acc:MGI:1913839]
ENSMUST00000080309	15	40	27543	0.000475502	NA	NA
ENSMUST00000106648	9	15	27543	0.000528973	Mical2	microtubule associated monoxygenase, calponin and LIM domain containing 2 Gene [Source:MGI Symbol;Acc:MGI:2444947]
ENSMUST00000093496	13	31	27543	0.000528973	Gm10284	predicted pseudogene 10284 Pseudogene [Source:MGI Symbol;Acc:MGI:3704311]
ENSMUST00000109812	9	15	27543	0.000528973	Camk2b	calcium/calmodulin-dependent protein kinase II, beta Gene [Source:MGI Symbol;Acc:MGI:88257]
ENSMUST00000081864	9	15	27543	0.000528973	Gm5239	predicted pseudogene 5239 Pseudogene [Source:MGI Symbol;Acc:MGI:3648788]
ENSMUST00000044355	8	12	27543	0.000590157	Sepw1	selenoprotein W, muscle 1 Gene [Source:MGI Symbol;Acc:MGI:1100878]
ENSMUST00000108839	8	12	27543	0.000590157	Tcf25	transcription factor 25 (basic helix-loop-helix) Gene [Source:MGI Symbol;Acc:MGI:1914105]
ENSMUST00000080666	8	12	27543	0.000590157	Ndrg4	N-myc downstream regulated gene 4 Gene [Source:MGI Symbol;Acc:MGI:2384590]
ENSMUST00000027606	7	9	27543	0.000590157	Rgs2	regulator of G-protein signaling 2 Gene [Source:MGI Symbol;Acc:MGI:1098271]
ENSMUST00000091762	7	9	27543	0.000590157	Gm5446	predicted gene 5446 Pseudogene [Source:MGI Symbol;Acc:MGI:3644854]
ENSMUST00000075886	7	9	27543	0.000590157	Gm5900	predicted pseudogene 5900 Pseudogene [Source:MGI Symbol;Acc:MGI:3643907]
ENSMUST00000110810	8	12	27543	0.000590157	Dlgap2	discs, large (Drosophila) homolog-associated protein 2 Gene [Source:MGI Symbol;Acc:MGI:2443181]
ENSMUST00000059673	8	12	27543	0.000590157	Gm8203	predicted pseudogene 8203 Pseudogene [Source:MGI Symbol;Acc:MGI:3646499]
ENSMUST00000098994	14	36	27543	0.000590157	Gm10709	predicted gene 10709 Gene [Source:MGI Symbol;Acc:MGI:3642754]
ENSMUST00000081993	14	37	27543	0.0007444	Gm10020	predicted pseudogene 10020 Pseudogene [Source:MGI Symbol;Acc:MGI:3642192]
ENSMUST00000080281	14	37	27543	0.0007444	Rpl15	ribosomal protein L15 Gene [Source:MGI Symbol;Acc:MGI:1913730]
ENSMUST00000075178	12	28	27543	0.00082906	Rpl18	ribosomal protein L18 Gene [Source:MGI Symbol;Acc:MGI:98003]
ENSMUST00000020372	9	16	27543	0.0008553	Uqcr11	ubiquinol-cytochrome c reductase, complex III subunit XI Gene [Source:MGI Symbol;Acc:MGI:1913844]
ENSMUST00000003442	9	16	27543	0.0008553	Cacnb3	calcium channel, voltage-dependent, beta 3 subunit Gene [Source:MGI Symbol;Acc:MGI:103307]
ENSMUST00000070124	9	16	27543	0.0008553	Hist1h2ai	histone cluster 1, H2ai Gene [Source:MGI Symbol;Acc:MGI:2448457]
ENSMUST00000101585	9	16	27543	0.0008553	Camk2b	calcium/calmodulin-dependent protein kinase II, beta Gene [Source:MGI Symbol;Acc:MGI:88257]
ENSMUST00000091745	9	16	27543	0.0008553	Gm11276	predicted gene 11276 Gene [Source:MGI Symbol;Acc:MGI:3710573]
ENSMUST00000118863	11	24	27543	0.000887526	Rpl18-ps2	ribosomal protein L18, pseudogene 2 Pseudogene [Source:MGI Symbol;Acc:MGI:3646997]
ENSMUST00000102977	11	24	27543	0.000887526	Hist1h4i	histone cluster 1, H4i Gene [Source:MGI Symbol;Acc:MGI:2448432]
ENSMUST00000019133	10	20	27543	0.000929309	Camk2b	calcium/calmodulin-dependent protein kinase II, beta Gene [Source:MGI Symbol;Acc:MGI:88257]
ENSMUST00000072503	12	29	27543	0.00111811	Rpl18	ribosomal protein L18 Gene [Source:MGI Symbol;Acc:MGI:98003]
ENSMUST00000119496	12	29	27543	0.00111811	Gm10224	predicted pseudogene 10224 Pseudogene [Source:MGI Symbol;Acc:MGI:3642708]
ENSMUST00000088480	12	29	27543	0.00111811	Rpl15-ps3	ribosomal protein L15, pseudogene 3 Pseudogene [Source:MGI Symbol;Acc:MGI:3782952]
ENSMUST00000114693	8	13	27543	0.00112166	Mtch1	mitochondrial carrier homolog 1 (C. elegans) Gene [Source:MGI Symbol;Acc:MGI:1929261]
ENSMUST00000066431	8	13	27543	0.00112166	Camk2b	calcium/calmodulin-dependent protein kinase II, beta Gene [Source:MGI Symbol;Acc:MGI:88257]
ENSMUST00000081342	8	13	27543	0.00112166	Hist1h2ao	histone cluster 1, H2ao Gene [Source:MGI Symbol;Acc:MGI:2448302]
ENSMUST00000093196	13	34	27543	0.00121082	Hmgb1	high mobility group box 1 Gene [Source:MGI Symbol;Acc:MGI:96113]
ENSMUST00000087958	14	39	27543	0.00123371	NA	NA
ENSMUST00000118281	11	25	27543	0.00128454	Hmgb1-ps4	high mobility group box 1, pseudogene 4 Pseudogene [Source:MGI Symbol;Acc:MGI:3768540]
ENSMUST00000072391	7	10	27543	0.00129999	Hist1h2aa	histone cluster 1, H2aa Gene [Source:MGI Symbol;Acc:MGI:2448285]
ENSMUST00000050149	9	17	27543	0.00135746	Mical2	microtubule associated monoxygenase, calponin and LIM domain containing 2 Gene [Source:MGI Symbol;Acc:MGI:2444947]
ENSMUST00000109815	9	17	27543	0.00135746	Camk2b	calcium/calmodulin-dependent protein kinase II, beta Gene [Source:MGI Symbol;Acc:MGI:88257]
ENSMUST00000080926	9	17	27543	0.00135746	Eno1	enolase 1, alpha non-neuron Gene [Source:MGI Symbol;Acc:MGI:95393]
ENSMUST00000118053	9	17	27543	0.00135746	Gm13379	predicted gene 13379 Pseudogene [Source:MGI Symbol;Acc:MGI:3649905]
ENSMUST00000034868	5	5	27543	0.00157972	Clk1	CDC-like kinase 1 Gene [Source:MGI Symbol;Acc:MGI:107403]
ENSMUST00000090443	8	14	27543	0.00214749	Camk2b	calcium/calmodulin-dependent protein kinase II, beta Gene [Source:MGI Symbol;Acc:MGI:88257]
ENSMUST00000081665	14	41	27543	0.00218633	Gm5561	predicted gene 5561 Pseudogene [Source:MGI Symbol;Acc:MGI:3804971]
ENSMUST00000056162	9	18	27543	0.00236386	NA	NA
ENSMUST00000119458	9	18	27543	0.00236386	Gm5943	predicted pseudogene 5943 Pseudogene [Source:MGI Symbol;Acc:MGI:3646004]
ENSMUST00000107102	7	11	27543	0.00272672	Rundc3a	RUN domain containing 3A Gene [Source:MGI Symbol;Acc:MGI:1858752]
ENSMUST00000015234	7	11	27543	0.00272672	Ptgds	prostaglandin D2 synthase (brain) Gene [Source:MGI Symbol;Acc:MGI:99261]
ENSMUST00000055990	7	11	27543	0.00272672	Eef1a2	eukaryotic translation elongation factor 1 alpha 2 Gene [Source:MGI Symbol;Acc:MGI:1096317]
ENSMUST00000005164	7	11	27543	0.00272672	Prkacb	protein kinase, cAMP dependent, catalytic, beta Gene [Source:MGI Symbol;Acc:MGI:97594]
ENSMUST00000023086	7	11	27543	0.00272672	1500032L24Rik	RIKEN cDNA 1500032L24 gene Gene [Source:MGI Symbol;Acc:MGI:1916279]
ENSMUST00000091747	7	11	27543	0.00272672	NA	NA
ENSMUST00000075596	7	11	27543	0.00272672	NA	NA
ENSMUST00000067276	7	11	27543	0.00272672	Gcnt1	glucosaminyl (N-acetyl) transferase 1, core 2 Gene [Source:MGI Symbol;Acc:MGI:95676]
ENSMUST00000032220	7	11	27543	0.00272672	Cops7a	COP9 (constitutive photomorphogenic) homolog, subunit 7a (Arabidopsis thaliana) Gene [Source:MGI Symbol;Acc:MGI:1349400]
ENSMUST00000107043	6	8	27543	0.00292096	Plekhb1	pleckstrin homology domain containing, family B (evectins) member 1 Gene [Source:MGI Symbol;Acc:MGI:1351469]
ENSMUST00000096986	6	8	27543	0.00292096	38596	septin 5 Gene [Source:MGI Symbol;Acc:MGI:1195461]
ENSMUST00000120487	6	8	27543	0.00292096	Gm12229	predicted gene 12229 Pseudogene [Source:MGI Symbol;Acc:MGI:3649743]
ENSMUST00000116305	10	23	27543	0.00314304	Gps1	G protein pathway suppressor 1 Gene [Source:MGI Symbol;Acc:MGI:2384801]
ENSMUST00000058407	8	15	27543	0.00347438	Uqcr10	ubiquinol-cytochrome c reductase, complex III subunit X Gene [Source:MGI Symbol;Acc:MGI:1913402]
ENSMUST00000051986	8	15	27543	0.00347438	NA	NA
ENSMUST00000115717	8	15	27543	0.00347438	Pde10a	phosphodiesterase 10A Gene [Source:MGI Symbol;Acc:MGI:1345143]
ENSMUST00000060645	9	19	27543	0.00347438	Ube2v1	ubiquitin-conjugating enzyme E2 variant 1 Gene [Source:MGI Symbol;Acc:MGI:1913839]
ENSMUST00000112476	8	15	27543	0.00347438	Eno2	enolase 2, gamma neuronal Gene [Source:MGI Symbol;Acc:MGI:95394]
ENSMUST00000081940	11	28	27543	0.00357168	Uba52	ubiquitin A-52 residue ribosomal protein fusion product 1 Gene [Source:MGI Symbol;Acc:MGI:98887]
ENSMUST00000120886	10	24	27543	0.00449266	Gm13882	predicted gene 13882 Pseudogene [Source:MGI Symbol;Acc:MGI:3650052]
ENSMUST00000097205	10	24	27543	0.00449266	NA	NA
ENSMUST00000073605	10	24	27543	0.00449266	Gapdh	glyceraldehyde-3-phosphate dehydrogenase Gene [Source:MGI Symbol;Acc:MGI:95640]
ENSMUST00000099665	10	24	27543	0.00449266	NA	NA
ENSMUST00000120637	10	24	27543	0.00449266	Gm13121	predicted gene 13121 Pseudogene [Source:MGI Symbol;Acc:MGI:3650486]
ENSMUST00000077575	11	29	27543	0.0049422	Gm11942	predicted gene 11942 Pseudogene [Source:MGI Symbol;Acc:MGI:3650608]
ENSMUST00000034281	7	12	27543	0.0049422	6430548M08Rik	RIKEN cDNA 6430548M08 gene Gene [Source:MGI Symbol;Acc:MGI:2443793]
ENSMUST00000118168	7	12	27543	0.0049422	Gm11336	predicted gene 11336 Pseudogene [Source:MGI Symbol;Acc:MGI:3651860]
ENSMUST00000107335	7	12	27543	0.0049422	S100a16	S100 calcium binding protein A16 Gene [Source:MGI Symbol;Acc:MGI:1915110]
ENSMUST00000105038	12	34	27543	0.0049422	Gm3550	predicted gene 3550 Gene [Source:MGI Symbol;Acc:MGI:3781727]
ENSMUST00000095144	7	12	27543	0.0049422	Pdp1	pyruvate dehyrogenase phosphatase catalytic subunit 1 Gene [Source:MGI Symbol;Acc:MGI:2685870]
ENSMUST00000026557	7	12	27543	0.0049422	Bet1l	blocked early in transport 1 homolog (S. cerevisiae)-like Gene [Source:MGI Symbol;Acc:MGI:1913128]
ENSMUST00000046094	7	12	27543	0.0049422	Ppp1ca	protein phosphatase 1, catalytic subunit, alpha isoform Gene [Source:MGI Symbol;Acc:MGI:103016]
ENSMUST00000078739	9	20	27543	0.00508922	Gm3226	predicted gene 3226 Pseudogene [Source:MGI Symbol;Acc:MGI:3804968]
ENSMUST00000042898	9	20	27543	0.00508922	Gstp1	glutathione S-transferase, pi 1 Gene [Source:MGI Symbol;Acc:MGI:95865]
ENSMUST00000111204	8	16	27543	0.00548271	NA	NA
ENSMUST00000001108	8	16	27543	0.00548271	Add1	adducin 1 (alpha) Gene [Source:MGI Symbol;Acc:MGI:87918]
ENSMUST00000077458	5	6	27543	0.00601287	Stxbp1	syntaxin binding protein 1 Gene [Source:MGI Symbol;Acc:MGI:107363]
ENSMUST00000066900	5	6	27543	0.00601287	NA	NA
ENSMUST00000071375	11	30	27543	0.00606513	NA	NA
ENSMUST00000058577	6	9	27543	0.00606513	2810046L04Rik	RIKEN cDNA 2810046L04 gene Gene [Source:MGI Symbol;Acc:MGI:1919933]
ENSMUST00000109577	6	9	27543	0.00606513	Epb4.1l1	erythrocyte protein band 4.1-like 1 Gene [Source:MGI Symbol;Acc:MGI:103010]
ENSMUST00000117548	11	30	27543	0.00606513	Gm15059	predicted gene 15059 Pseudogene [Source:MGI Symbol;Acc:MGI:3705529]
ENSMUST00000120421	11	30	27543	0.00606513	Gm15387	predicted gene 15387 Pseudogene [Source:MGI Symbol;Acc:MGI:3705374]
ENSMUST00000073196	11	30	27543	0.00606513	Gm10075	predicted gene 10075 Pseudogene [Source:MGI Symbol;Acc:MGI:3710521]
ENSMUST00000101045	10	25	27543	0.00606513	Atp2b2	ATPase, Ca++ transporting, plasma membrane 2 Gene [Source:MGI Symbol;Acc:MGI:105368]
ENSMUST00000102984	6	9	27543	0.00606513	NA	NA
ENSMUST00000082036	6	9	27543	0.00606513	NA	NA
ENSMUST00000118415	11	30	27543	0.00606513	Hmgb1-ps3	high mobility group box 1, pseudogene 3 Pseudogene [Source:MGI Symbol;Acc:MGI:3768539]
ENSMUST00000073009	6	9	27543	0.00606513	NA	NA
ENSMUST00000054444	9	21	27543	0.00723652	Rpl18-ps2	ribosomal protein L18, pseudogene 2 Pseudogene [Source:MGI Symbol;Acc:MGI:3646997]
ENSMUST00000122352	9	21	27543	0.00723652	Gm11953	predicted gene 11953 Pseudogene [Source:MGI Symbol;Acc:MGI:3649564]
ENSMUST00000093355	7	13	27543	0.00783865	Camk2b	calcium/calmodulin-dependent protein kinase II, beta Gene [Source:MGI Symbol;Acc:MGI:88257]
ENSMUST00000107409	8	17	27543	0.00783865	Mfge8	milk fat globule-EGF factor 8 protein Gene [Source:MGI Symbol;Acc:MGI:102768]
ENSMUST00000077628	10	26	27543	0.00783865	Gm10051	predicted pseudogene 10051 Pseudogene [Source:MGI Symbol;Acc:MGI:3641791]
ENSMUST00000119246	10	26	27543	0.00783865	Gm12286	predicted gene 12286 Pseudogene [Source:MGI Symbol;Acc:MGI:3649467]
ENSMUST00000119187	7	13	27543	0.00783865	Gm16106	predicted gene 16106 Pseudogene [Source:MGI Symbol;Acc:MGI:3801781]
ENSMUST00000090860	10	26	27543	0.00783865	Gm10116	predicted pseudogene 10116 Pseudogene [Source:MGI Symbol;Acc:MGI:3779109]
ENSMUST00000073935	7	13	27543	0.00783865	Gsg1l	GSG1-like Gene [Source:MGI Symbol;Acc:MGI:2685483]
ENSMUST00000074369	7	13	27543	0.00783865	Zfp825	zinc finger protein 825 Gene [Source:MGI Symbol;Acc:MGI:2385315]
ENSMUST00000095320	8	17	27543	0.00783865	Gm10313	predicted pseudogene 10313 Pseudogene [Source:MGI Symbol;Acc:MGI:3642852]
ENSMUST00000073782	7	13	27543	0.00783865	Gm4979	predicted gene 4979 Gene [Source:MGI Symbol;Acc:MGI:3644476]
ENSMUST00000110865	7	13	27543	0.00783865	Adap1	ArfGAP with dual PH domains 1 Gene [Source:MGI Symbol;Acc:MGI:2442201]
ENSMUST00000035045	7	13	27543	0.00783865	Mras	muscle and microspikes RAS Gene [Source:MGI Symbol;Acc:MGI:1100856]
ENSMUST00000091746	7	13	27543	0.00783865	NA	NA
ENSMUST00000116058	7	13	27543	0.00783865	Rpl28-ps3	ribosomal protein L28, pseudogene 3 Pseudogene [Source:MGI Symbol;Acc:MGI:3650282]
ENSMUST00000120983	4	4	27543	0.00983498	Gm6441	predicted gene 6441 Pseudogene [Source:MGI Symbol;Acc:MGI:3646924]
ENSMUST00000118720	9	22	27543	0.0100864	Gm11599	predicted gene 11599 Pseudogene [Source:MGI Symbol;Acc:MGI:3651840]
ENSMUST00000086739	9	22	27543	0.0100864	Gm10566	predicted gene 10566 Pseudogene [Source:MGI Symbol;Acc:MGI:3642220]
ENSMUST00000117717	6	10	27543	0.0116977	Gm14094	predicted gene 14094 Pseudogene [Source:MGI Symbol;Acc:MGI:3651963]
ENSMUST00000076545	6	10	27543	0.0116977	NA	NA
ENSMUST00000007216	6	10	27543	0.0116977	Ap2m1	adaptor protein complex AP-2, mu1 Gene [Source:MGI Symbol;Acc:MGI:1298405]
ENSMUST00000119801	6	10	27543	0.0116977	Gm11955	predicted gene 11955 Pseudogene [Source:MGI Symbol;Acc:MGI:3649568]
ENSMUST00000085941	6	10	27543	0.0116977	Znhit1	zinc finger, HIT domain containing 1 Gene [Source:MGI Symbol;Acc:MGI:1917353]
ENSMUST00000089940	6	10	27543	0.0116977	Gm4943	predicted pseudogene 4943 Pseudogene [Source:MGI Symbol;Acc:MGI:3645174]
ENSMUST00000035199	6	10	27543	0.0116977	Rbm5	RNA binding motif protein 5 Gene [Source:MGI Symbol;Acc:MGI:1933204]
ENSMUST00000097844	6	10	27543	0.0116977	Srsf10	serine/arginine-rich splicing factor 10 Gene [Source:MGI Symbol;Acc:MGI:1333805]
ENSMUST00000039538	8	18	27543	0.011894	Arid4b	AT rich interactive domain 4B (RBP1-like) Gene [Source:MGI Symbol;Acc:MGI:2137512]
ENSMUST00000115715	8	18	27543	0.011894	Pde10a	phosphodiesterase 10A Gene [Source:MGI Symbol;Acc:MGI:1345143]
ENSMUST00000107103	8	18	27543	0.011894	Rundc3a	RUN domain containing 3A Gene [Source:MGI Symbol;Acc:MGI:1858752]
ENSMUST00000085546	12	38	27543	0.0121451	Hmgb1	high mobility group box 1 Gene [Source:MGI Symbol;Acc:MGI:96113]
ENSMUST00000118443	7	14	27543	0.012298	Gm11285	predicted gene 11285 Pseudogene [Source:MGI Symbol;Acc:MGI:3651653]
ENSMUST00000074752	7	14	27543	0.012298	Hist1h2ak	histone cluster 1, H2ak Gene [Source:MGI Symbol;Acc:MGI:2448297]
ENSMUST00000114259	7	14	27543	0.012298	Ptgds	prostaglandin D2 synthase (brain) Gene [Source:MGI Symbol;Acc:MGI:99261]
ENSMUST00000075389	7	14	27543	0.012298	Adap1	ArfGAP with dual PH domains 1 Gene [Source:MGI Symbol;Acc:MGI:2442201]
ENSMUST00000035700	7	14	27543	0.012298	Camkv	CaM kinase-like vesicle-associated Gene [Source:MGI Symbol;Acc:MGI:2384296]
ENSMUST00000054220	7	14	27543	0.012298	Rpl18a	ribosomal protein L18A Gene [Source:MGI Symbol;Acc:MGI:1924058]
ENSMUST00000117095	7	14	27543	0.012298	Pld3	phospholipase D family, member 3 Gene [Source:MGI Symbol;Acc:MGI:1333782]
ENSMUST00000114251	7	14	27543	0.012298	Ptgds	prostaglandin D2 synthase (brain) Gene [Source:MGI Symbol;Acc:MGI:99261]
ENSMUST00000089898	7	14	27543	0.012298	Rps15-ps2	ribosomal protein S15, pseudogene 2 Pseudogene [Source:MGI Symbol;Acc:MGI:3647234]
ENSMUST00000120953	7	14	27543	0.012298	Gm13413	predicted gene 13413 Pseudogene [Source:MGI Symbol;Acc:MGI:3650613]
ENSMUST00000091710	7	14	27543	0.012298	Hist1h2aj	histone cluster 1, H2aj Pseudogene [Source:MGI Symbol;Acc:MGI:2448312]
ENSMUST00000105648	7	14	27543	0.012298	Kcnab2	potassium voltage-gated channel, shaker-related subfamily, beta member 2 Gene [Source:MGI Symbol;Acc:MGI:109239]
ENSMUST00000037991	7	14	27543	0.012298	Mical2	microtubule associated monoxygenase, calponin and LIM domain containing 2 Gene [Source:MGI Symbol;Acc:MGI:2444947]
ENSMUST00000112335	5	7	27543	0.0129661	Rbp4	retinol binding protein 4, plasma Gene [Source:MGI Symbol;Acc:MGI:97879]
ENSMUST00000120418	10	28	27543	0.0129661	Gm13436	predicted gene 13436 Pseudogene [Source:MGI Symbol;Acc:MGI:3651005]
ENSMUST00000080097	9	23	27543	0.0129661	Gm16415	predicted pseudogene 16415 Pseudogene [Source:MGI Symbol;Acc:MGI:3647855]
ENSMUST00000118248	10	28	27543	0.0129661	Gm14036	predicted gene 14036 Pseudogene [Source:MGI Symbol;Acc:MGI:3649581]
ENSMUST00000064656	5	7	27543	0.0129661	Zfp365	zinc finger protein 365 Gene [Source:MGI Symbol;Acc:MGI:2143676]
ENSMUST00000091713	5	7	27543	0.0129661	NA	NA
ENSMUST00000107963	5	7	27543	0.0129661	Dclk1	doublecortin-like kinase 1 Gene [Source:MGI Symbol;Acc:MGI:1330861]
ENSMUST00000100526	5	7	27543	0.0129661	Gm10874	predicted gene 10874 Gene [Source:MGI Symbol;Acc:MGI:3704261]
ENSMUST00000050000	5	7	27543	0.0129661	Stxbp1	syntaxin binding protein 1 Gene [Source:MGI Symbol;Acc:MGI:107363]
ENSMUST00000119766	5	7	27543	0.0129661	Gm12118	predicted gene 12118 Pseudogene [Source:MGI Symbol;Acc:MGI:3652027]
ENSMUST00000116288	5	7	27543	0.0129661	NA	NA
ENSMUST00000100152	10	28	27543	0.0129661	NA	NA
ENSMUST00000103049	8	19	27543	0.0159767	Kcnq2	potassium voltage-gated channel, subfamily Q, member 2 Gene [Source:MGI Symbol;Acc:MGI:1309503]
ENSMUST00000071965	8	19	27543	0.0159767	Gm7808	predicted pseudogene 7808 Pseudogene [Source:MGI Symbol;Acc:MGI:3643360]
ENSMUST00000081067	8	19	27543	0.0159767	Gm13699	predicted gene 13699 Pseudogene [Source:MGI Symbol;Acc:MGI:3651585]
ENSMUST00000080210	8	19	27543	0.0159767	Slc1a2	solute carrier family 1 (glial high affinity glutamate transporter), member 2 Gene [Source:MGI Symbol;Acc:MGI:101931]
ENSMUST00000109588	11	34	27543	0.0159767	Gm12033	predicted gene 12033 Gene [Source:MGI Symbol;Acc:MGI:3650772]
ENSMUST00000115718	8	19	27543	0.0159767	Pde10a	phosphodiesterase 10A Gene [Source:MGI Symbol;Acc:MGI:1345143]
ENSMUST00000121506	7	15	27543	0.0174481	Gm5270	predicted gene 5270 Pseudogene [Source:MGI Symbol;Acc:MGI:3647658]
ENSMUST00000105169	12	40	27543	0.0174481	Gm4294	predicted gene 4294 Gene [Source:MGI Symbol;Acc:MGI:3782472]
ENSMUST00000090023	6	11	27543	0.0174481	Ap2m1	adaptor protein complex AP-2, mu1 Gene [Source:MGI Symbol;Acc:MGI:1298405]
ENSMUST00000051356	6	11	27543	0.0174481	Akt2	thymoma viral proto-oncogene 2 Gene [Source:MGI Symbol;Acc:MGI:104874]
ENSMUST00000091920	6	11	27543	0.0174481	Rbm27	RNA binding motif protein 27 Gene [Source:MGI Symbol;Acc:MGI:2147194]
ENSMUST00000105887	7	15	27543	0.0174481	Dhdds	dehydrodolichyl diphosphate synthase Gene [Source:MGI Symbol;Acc:MGI:1914672]
ENSMUST00000106255	6	11	27543	0.0174481	Cap1	CAP, adenylate cyclase-associated protein 1 (yeast) Gene [Source:MGI Symbol;Acc:MGI:88262]
ENSMUST00000106143	9	24	27543	0.0174481	Gps1	G protein pathway suppressor 1 Gene [Source:MGI Symbol;Acc:MGI:2384801]
ENSMUST00000050312	7	15	27543	0.0174481	Mapk8ip1	mitogen-activated protein kinase 8 interacting protein 1 Gene [Source:MGI Symbol;Acc:MGI:1309464]
ENSMUST00000081285	7	15	27543	0.0174481	Syngap1	synaptic Ras GTPase activating protein 1 homolog (rat) Gene [Source:MGI Symbol;Acc:MGI:3039785]
ENSMUST00000049117	6	11	27543	0.0174481	Gm5830	predicted pseudogene 5830 Pseudogene [Source:MGI Symbol;Acc:MGI:3647375]
ENSMUST00000046972	6	11	27543	0.0174481	Rbm27	RNA binding motif protein 27 Gene [Source:MGI Symbol;Acc:MGI:2147194]
ENSMUST00000039259	7	15	27543	0.0174481	Agap2	ArfGAP with GTPase domain, ankyrin repeat and PH domain 2 Gene [Source:MGI Symbol;Acc:MGI:3580016]
ENSMUST00000060148	7	15	27543	0.0174481	Hivep1	human immunodeficiency virus type I enhancer binding protein 1 Gene [Source:MGI Symbol;Acc:MGI:96100]
ENSMUST00000020522	7	15	27543	0.0174481	Pfkl	phosphofructokinase, liver, B-type Gene [Source:MGI Symbol;Acc:MGI:97547]
ENSMUST00000109608	7	15	27543	0.0174481	Cpne1	copine I Gene [Source:MGI Symbol;Acc:MGI:2386621]
ENSMUST00000111279	6	11	27543	0.0174481	Mapk8ip1	mitogen-activated protein kinase 8 interacting protein 1 Gene [Source:MGI Symbol;Acc:MGI:1309464]
ENSMUST00000032825	7	15	27543	0.0174481	Mfge8	milk fat globule-EGF factor 8 protein Gene [Source:MGI Symbol;Acc:MGI:102768]
ENSMUST00000102971	6	11	27543	0.0174481	Hist1h4f	histone cluster 1, H4f Gene [Source:MGI Symbol;Acc:MGI:2448425]
ENSMUST00000072587	6	11	27543	0.0174481	Mrps21	mitochondrial ribosomal protein S21 Gene [Source:MGI Symbol;Acc:MGI:1913542]
ENSMUST00000115550	6	11	27543	0.0174481	Rbm27	RNA binding motif protein 27 Gene [Source:MGI Symbol;Acc:MGI:2147194]
ENSMUST00000101417	6	11	27543	0.0174481	Tra2a	transformer 2 alpha homolog (Drosophila) Gene [Source:MGI Symbol;Acc:MGI:1933972]
ENSMUST00000090731	6	11	27543	0.0174481	Gm5499	predicted pseudogene 5499 Pseudogene [Source:MGI Symbol;Acc:MGI:3643804]
ENSMUST00000118688	7	15	27543	0.0174481	Gm8661	predicted gene 8661 Pseudogene [Source:MGI Symbol;Acc:MGI:3645695]
ENSMUST00000112093	6	11	27543	0.0174481	NA	NA
ENSMUST00000100134	9	24	27543	0.0174481	Gps1	G protein pathway suppressor 1 Gene [Source:MGI Symbol;Acc:MGI:2384801]
ENSMUST00000034689	6	11	27543	0.0174481	Pin1	protein (peptidyl-prolyl cis/trans isomerase) NIMA-interacting 1 Gene [Source:MGI Symbol;Acc:MGI:1346036]
ENSMUST00000100799	12	41	27543	0.0204792	Rpl15	ribosomal protein L15 Gene [Source:MGI Symbol;Acc:MGI:1913730]
ENSMUST00000094953	8	20	27543	0.0213961	Dnajc6	DnaJ (Hsp40) homolog, subfamily C, member 6 Gene [Source:MGI Symbol;Acc:MGI:1919935]
ENSMUST00000106933	8	20	27543	0.0213961	Dnajc6	DnaJ (Hsp40) homolog, subfamily C, member 6 Gene [Source:MGI Symbol;Acc:MGI:1919935]
ENSMUST00000074976	9	25	27543	0.0221593	Hist2h2aa1	histone cluster 2, H2aa1 Gene [Source:MGI Symbol;Acc:MGI:96097]
ENSMUST00000107047	5	8	27543	0.0253915	Plekhb1	pleckstrin homology domain containing, family B (evectins) member 1 Gene [Source:MGI Symbol;Acc:MGI:1351469]
ENSMUST00000121361	5	8	27543	0.0253915	Gm12009	predicted gene 12009 Pseudogene [Source:MGI Symbol;Acc:MGI:3651311]
ENSMUST00000111094	5	8	27543	0.0253915	Fis1	fission 1 (mitochondrial outer membrane) homolog (yeast) Gene [Source:MGI Symbol;Acc:MGI:1913687]
ENSMUST00000022616	5	8	27543	0.0253915	Clu	clusterin Gene [Source:MGI Symbol;Acc:MGI:88423]
ENSMUST00000119724	5	8	27543	0.0253915	Gm12341	predicted gene 12341 Pseudogene [Source:MGI Symbol;Acc:MGI:3650080]
ENSMUST00000100178	5	8	27543	0.0253915	NA	NA
ENSMUST00000106647	5	8	27543	0.0253915	Mical2	microtubule associated monoxygenase, calponin and LIM domain containing 2 Gene [Source:MGI Symbol;Acc:MGI:2444947]
ENSMUST00000116500	5	8	27543	0.0253915	Gm15487	predicted gene 15487 Pseudogene [Source:MGI Symbol;Acc:MGI:3709610]
ENSMUST00000109571	5	8	27543	0.0253915	NA	NA
ENSMUST00000048934	5	8	27543	0.0253915	Tbr1	T-box brain gene 1 Gene [Source:MGI Symbol;Acc:MGI:107404]
ENSMUST00000106922	5	8	27543	0.0253915	NA	NA
ENSMUST00000103139	5	8	27543	0.0253915	Thra	thyroid hormone receptor alpha Gene [Source:MGI Symbol;Acc:MGI:98742]
ENSMUST00000114635	5	8	27543	0.0253915	Btbd9	BTB (POZ) domain containing 9 Gene [Source:MGI Symbol;Acc:MGI:1916625]
ENSMUST00000042641	5	8	27543	0.0253915	Zfp60	zinc finger protein 60 Gene [Source:MGI Symbol;Acc:MGI:99207]
ENSMUST00000082136	5	8	27543	0.0253915	Max	Max protein Gene [Source:MGI Symbol;Acc:MGI:96921]
ENSMUST00000106291	7	16	27543	0.0254758	Ube2d3	ubiquitin-conjugating enzyme E2D 3 (UBC4/5 homolog, yeast) Gene [Source:MGI Symbol;Acc:MGI:1913355]
ENSMUST00000089003	7	16	27543	0.0254758	Atp2b2	ATPase, Ca++ transporting, plasma membrane 2 Gene [Source:MGI Symbol;Acc:MGI:105368]
ENSMUST00000109089	7	16	27543	0.0254758	NA	NA
ENSMUST00000043200	7	16	27543	0.0254758	Smap2	stromal membrane-associated GTPase-activating protein 2 Gene [Source:MGI Symbol;Acc:MGI:1917030]
ENSMUST00000120017	7	16	27543	0.0254758	Gm12960	predicted gene 12960 Pseudogene [Source:MGI Symbol;Acc:MGI:3651525]
ENSMUST00000055808	6	12	27543	0.0267263	Ywhag	tyrosine 3-monooxygenase/tryptophan 5-monooxygenase activation protein, gamma polypeptide Gene [Source:MGI Symbol;Acc:MGI:108109]
ENSMUST00000109924	6	12	27543	0.0267263	Gm4979	predicted gene 4979 Gene [Source:MGI Symbol;Acc:MGI:3644476]
ENSMUST00000077309	6	12	27543	0.0267263	Gm4953	predicted pseudogene 4953 Pseudogene [Source:MGI Symbol;Acc:MGI:3647627]
ENSMUST00000113350	6	12	27543	0.0267263	Dnm1	dynamin 1 Gene [Source:MGI Symbol;Acc:MGI:107384]
ENSMUST00000105276	6	12	27543	0.0267263	Syt1	synaptotagmin I Gene [Source:MGI Symbol;Acc:MGI:99667]
ENSMUST00000091879	6	12	27543	0.0267263	3110048L19Rik	RIKEN cDNA 3110048L19 gene Gene [Source:MGI Symbol;Acc:MGI:1920483]
ENSMUST00000053926	6	12	27543	0.0267263	Pick1	protein interacting with C kinase 1 Gene [Source:MGI Symbol;Acc:MGI:894645]
ENSMUST00000078352	6	12	27543	0.0267263	Dnm1	dynamin 1 Gene [Source:MGI Symbol;Acc:MGI:107384]
ENSMUST00000108951	6	12	27543	0.0267263	6430548M08Rik	RIKEN cDNA 6430548M08 gene Gene [Source:MGI Symbol;Acc:MGI:2443793]
ENSMUST00000087417	6	12	27543	0.0267263	Abi2	abl-interactor 2 Gene [Source:MGI Symbol;Acc:MGI:106913]
ENSMUST00000079030	6	12	27543	0.0267263	NA	NA
ENSMUST00000091621	6	12	27543	0.0267263	Gm7251	predicted pseudogene 7251 Pseudogene [Source:MGI Symbol;Acc:MGI:3646144]
ENSMUST00000074110	6	12	27543	0.0267263	Gm8355	predicted pseudogene 8355 Pseudogene [Source:MGI Symbol;Acc:MGI:3645191]
ENSMUST00000038207	8	21	27543	0.0267263	Dnajc6	DnaJ (Hsp40) homolog, subfamily C, member 6 Gene [Source:MGI Symbol;Acc:MGI:1919935]
ENSMUST00000105853	6	12	27543	0.0267263	Srsf10	serine/arginine-rich splicing factor 10 Gene [Source:MGI Symbol;Acc:MGI:1333805]
ENSMUST00000030922	6	12	27543	0.0267263	Prkcz	protein kinase C, zeta Gene [Source:MGI Symbol;Acc:MGI:97602]
ENSMUST00000091742	8	21	27543	0.0267263	Hist1h2ah	histone cluster 1, H2ah Gene [Source:MGI Symbol;Acc:MGI:2448295]
ENSMUST00000118947	6	12	27543	0.0267263	Gm15443	predicted gene 15443 Pseudogene [Source:MGI Symbol;Acc:MGI:3642525]
ENSMUST00000036161	8	21	27543	0.0267263	Pi4ka	phosphatidylinositol 4-kinase, catalytic, alpha polypeptide Gene [Source:MGI Symbol;Acc:MGI:2448506]
ENSMUST00000089250	6	12	27543	0.0267263	Ptk2b	PTK2 protein tyrosine kinase 2 beta Gene [Source:MGI Symbol;Acc:MGI:104908]
ENSMUST00000031131	6	12	27543	0.0267263	Uchl1	ubiquitin carboxy-terminal hydrolase L1 Gene [Source:MGI Symbol;Acc:MGI:103149]
ENSMUST00000102845	6	12	27543	0.0267263	Rps27a	ribosomal protein S27A Gene [Source:MGI Symbol;Acc:MGI:1925544]
ENSMUST00000108840	6	12	27543	0.0267263	Tcf25	transcription factor 25 (basic helix-loop-helix) Gene [Source:MGI Symbol;Acc:MGI:1914105]
ENSMUST00000002817	8	21	27543	0.0267263	Camk2b	calcium/calmodulin-dependent protein kinase II, beta Gene [Source:MGI Symbol;Acc:MGI:88257]
ENSMUST00000121623	10	32	27543	0.0316879	2810422J05Rik	RIKEN cDNA 2810422J05 gene Gene [Source:MGI Symbol;Acc:MGI:1922870]
ENSMUST00000020268	7	17	27543	0.0348937	Ccar1	cell division cycle and apoptosis regulator 1 Gene [Source:MGI Symbol;Acc:MGI:1914750]
ENSMUST00000087222	7	17	27543	0.0348937	Gm16470	predicted pseudogene 16470 Pseudogene [Source:MGI Symbol;Acc:MGI:3645079]
ENSMUST00000091740	7	17	27543	0.0348937	NA	NA
ENSMUST00000078693	7	17	27543	0.0348937	NA	NA
ENSMUST00000075898	9	27	27543	0.0348937	Gm5921	predicted gene 5921 Gene [Source:MGI Symbol;Acc:MGI:3648968]
ENSMUST00000102967	7	17	27543	0.0348937	Hist1h4c	histone cluster 1, H4c Gene [Source:MGI Symbol;Acc:MGI:2448421]
ENSMUST00000020395	7	17	27543	0.0348937	NA	NA
ENSMUST00000100754	9	27	27543	0.0348937	Gm2606	predicted pseudogene 2606 Pseudogene [Source:MGI Symbol;Acc:MGI:3780774]
ENSMUST00000119692	7	17	27543	0.0348937	Gm5760	predicted gene 5760 Pseudogene [Source:MGI Symbol;Acc:MGI:3647653]
ENSMUST00000110453	7	17	27543	0.0348937	NA	NA
ENSMUST00000111206	7	17	27543	0.0348937	NA	NA
ENSMUST00000073261	7	17	27543	0.0348937	Hist1h2af	histone cluster 1, H2af Gene [Source:MGI Symbol;Acc:MGI:2448309]
ENSMUST00000098560	8	22	27543	0.0364492	Gm2574	predicted pseudogene 2574 Pseudogene [Source:MGI Symbol;Acc:MGI:3780741]
ENSMUST00000121497	8	22	27543	0.0364492	Rpl28-ps1	ribosomal protein L28, pseudogene 1 Pseudogene [Source:MGI Symbol;Acc:MGI:3705349]
ENSMUST00000104945	8	22	27543	0.0364492	AC147142.1	Glyceraldehyde-3-phosphate dehydrogenase [Source:UniProtKB/Swiss-Prot;Acc:P16858]
ENSMUST00000097914	8	22	27543	0.0364492	Rnf220	ring finger protein 220 Gene [Source:MGI Symbol;Acc:MGI:1913993]
ENSMUST00000108948	5	9	27543	0.0384002	6430548M08Rik	RIKEN cDNA 6430548M08 gene Gene [Source:MGI Symbol;Acc:MGI:2443793]
ENSMUST00000079114	5	9	27543	0.0384002	AC154631.1
ENSMUST00000071998	6	13	27543	0.0384002	NA	NA
ENSMUST00000022622	6	13	27543	0.0384002	Ptk2b	PTK2 protein tyrosine kinase 2 beta Gene [Source:MGI Symbol;Acc:MGI:104908]
ENSMUST00000030572	5	9	27543	0.0384002	Hpca	hippocalcin Gene [Source:MGI Symbol;Acc:MGI:1336200]
ENSMUST00000018522	6	13	27543	0.0384002	Cuedc1	CUE domain containing 1 Gene [Source:MGI Symbol;Acc:MGI:2144281]
ENSMUST00000106429	6	13	27543	0.0384002	1810037I17Rik	RIKEN cDNA 1810037I17 gene Gene [Source:MGI Symbol;Acc:MGI:1914954]
ENSMUST00000024763	5	9	27543	0.0384002	Mrps18a	mitochondrial ribosomal protein S18A Gene [Source:MGI Symbol;Acc:MGI:1915815]
ENSMUST00000107237	6	13	27543	0.0384002	Psmd4	proteasome (prosome, macropain) 26S subunit, non-ATPase, 4 Gene [Source:MGI Symbol;Acc:MGI:1201670]
ENSMUST00000102965	6	13	27543	0.0384002	Hist1h4b	histone cluster 1, H4b Gene [Source:MGI Symbol;Acc:MGI:2448420]
ENSMUST00000087468	6	13	27543	0.0384002	Bcat1	branched chain aminotransferase 1, cytosolic Gene [Source:MGI Symbol;Acc:MGI:104861]
ENSMUST00000117539	5	9	27543	0.0384002	Kif2a	kinesin family member 2A Gene [Source:MGI Symbol;Acc:MGI:108390]
ENSMUST00000025853	5	9	27543	0.0384002	Drap1	Dr1 associated protein 1 (negative cofactor 2 alpha) Gene [Source:MGI Symbol;Acc:MGI:1913806]
ENSMUST00000004140	5	9	27543	0.0384002	Gstm1	glutathione S-transferase, mu 1 Gene [Source:MGI Symbol;Acc:MGI:95860]
ENSMUST00000122373	5	9	27543	0.0384002	Gm15487	predicted gene 15487 Pseudogene [Source:MGI Symbol;Acc:MGI:3709610]
ENSMUST00000117405	6	13	27543	0.0384002	Gm15459	predicted gene 15459 Pseudogene [Source:MGI Symbol;Acc:MGI:3705702]
ENSMUST00000116646	5	9	27543	0.0384002	Stau2	staufen (RNA binding protein) homolog 2 (Drosophila) Gene [Source:MGI Symbol;Acc:MGI:1352508]
ENSMUST00000042055	6	13	27543	0.0384002	Ppp2r4	protein phosphatase 2A, regulatory subunit B (PR 53) Gene [Source:MGI Symbol;Acc:MGI:1346006]
ENSMUST00000103137	5	9	27543	0.0384002	Epb4.1l1	erythrocyte protein band 4.1-like 1 Gene [Source:MGI Symbol;Acc:MGI:103010]
ENSMUST00000102983	5	9	27543	0.0384002	Hist1h4k	histone cluster 1, H4k Gene [Source:MGI Symbol;Acc:MGI:2448439]
ENSMUST00000022629	5	9	27543	0.0384002	Dpysl2	dihydropyrimidinase-like 2 Gene [Source:MGI Symbol;Acc:MGI:1349763]
ENSMUST00000028823	6	13	27543	0.0384002	NA	NA
ENSMUST00000102979	6	13	27543	0.0384002	Hist1h4m	histone cluster 1, H4m Gene [Source:MGI Symbol;Acc:MGI:2448441]
ENSMUST00000107841	5	9	27543	0.0384002	Prmt1	protein arginine N-methyltransferase 1 Gene [Source:MGI Symbol;Acc:MGI:107846]
ENSMUST00000119890	5	9	27543	0.0384002	Gm8832	predicted gene 8832 Pseudogene [Source:MGI Symbol;Acc:MGI:3646854]
ENSMUST00000102534	6	13	27543	0.0384002	Rasgrp1	RAS guanyl releasing protein 1 Gene [Source:MGI Symbol;Acc:MGI:1314635]
ENSMUST00000064187	5	9	27543	0.0384002	Thra	thyroid hormone receptor alpha Gene [Source:MGI Symbol;Acc:MGI:98742]
ENSMUST00000086535	6	13	27543	0.0384002	Rpl31	ribosomal protein L31 Gene [Source:MGI Symbol;Acc:MGI:2149632]
ENSMUST00000030438	5	9	27543	0.0384002	Srsf10	serine/arginine-rich splicing factor 10 Gene [Source:MGI Symbol;Acc:MGI:1333805]
ENSMUST00000087566	6	13	27543	0.0384002	Aldoa	aldolase A, fructose-bisphosphate Gene [Source:MGI Symbol;Acc:MGI:87994]
ENSMUST00000049527	5	9	27543	0.0384002	Prkar1a	protein kinase, cAMP dependent regulatory, type I, alpha Gene [Source:MGI Symbol;Acc:MGI:104878]
ENSMUST00000090031	5	9	27543	0.0384002	Gng5	guanine nucleotide binding protein (G protein), gamma 5 Gene [Source:MGI Symbol;Acc:MGI:109164]
ENSMUST00000121788	5	9	27543	0.0384002	Rps15-ps2	ribosomal protein S15, pseudogene 2 Pseudogene [Source:MGI Symbol;Acc:MGI:3647234]
ENSMUST00000022057	5	9	27543	0.0384002	Tppp	tubulin polymerization promoting protein Gene [Source:MGI Symbol;Acc:MGI:1920198]
ENSMUST00000108586	6	13	27543	0.0384002	Dlg4	discs, large homolog 4 (Drosophila) Gene [Source:MGI Symbol;Acc:MGI:1277959]
ENSMUST00000097552	6	13	27543	0.0384002	Wdr7	WD repeat domain 7 Gene [Source:MGI Symbol;Acc:MGI:1860197]
ENSMUST00000119716	5	9	27543	0.0384002	Gm13170	predicted gene 13170 Pseudogene [Source:MGI Symbol;Acc:MGI:3651095]
ENSMUST00000110889	5	9	27543	0.0384002	Prkar1b	protein kinase, cAMP dependent regulatory, type I beta Gene [Source:MGI Symbol;Acc:MGI:97759]
ENSMUST00000067093	6	13	27543	0.0384002	Pde8b	phosphodiesterase 8B Gene [Source:MGI Symbol;Acc:MGI:2443999]
ENSMUST00000104941	6	13	27543	0.0384002	Gm11275	predicted gene 11275 Gene [Source:MGI Symbol;Acc:MGI:3711960]
ENSMUST00000091751	6	13	27543	0.0384002	Hist1h2an	histone cluster 1, H2an Gene [Source:MGI Symbol;Acc:MGI:2448300]
ENSMUST00000106671	5	9	27543	0.0384002	NA	NA
ENSMUST00000091702	6	13	27543	0.0384002	NA	NA
ENSMUST00000109197	5	9	27543	0.0384002	Zfp62	zinc finger protein 62 Gene [Source:MGI Symbol;Acc:MGI:99662]
ENSMUST00000111127	5	9	27543	0.0384002	Polr2j	polymerase (RNA) II (DNA directed) polypeptide J Gene [Source:MGI Symbol;Acc:MGI:109582]
ENSMUST00000085711	6	13	27543	0.0384002	Gm5121	predicted gene 5121 Gene [Source:MGI Symbol;Acc:MGI:3647258]
ENSMUST00000109576	5	9	27543	0.0384002	Epb4.1l1	erythrocyte protein band 4.1-like 1 Gene [Source:MGI Symbol;Acc:MGI:103010]
ENSMUST00000074271	6	13	27543	0.0384002	App	amyloid beta (A4) precursor protein Gene [Source:MGI Symbol;Acc:MGI:88059]
ENSMUST00000122133	6	13	27543	0.0384002	Gm14251	predicted gene 14251 Pseudogene [Source:MGI Symbol;Acc:MGI:3650992]
ENSMUST00000110456	7	18	27543	0.0433508	0610011F06Rik	RIKEN cDNA 0610011F06 gene Gene [Source:MGI Symbol;Acc:MGI:1915597]
ENSMUST00000076487	7	18	27543	0.0433508	NA	NA
ENSMUST00000095844	7	18	27543	0.0433508	Phactr1	phosphatase and actin regulator 1 Gene [Source:MGI Symbol;Acc:MGI:2659021]
ENSMUST00000079419	10	34	27543	0.0433508	Rpl15	ribosomal protein L15 Gene [Source:MGI Symbol;Acc:MGI:1913730]
ENSMUST00000053722	7	18	27543	0.0433508	Zfp607	zinc finger proten 607 Gene [Source:MGI Symbol;Acc:MGI:3584526]
ENSMUST00000108589	7	18	27543	0.0433508	Dlg4	discs, large homolog 4 (Drosophila) Gene [Source:MGI Symbol;Acc:MGI:1277959]
ENSMUST00000110478	7	18	27543	0.0433508	NA	NA
ENSMUST00000076155	7	18	27543	0.0433508	Gm5506	predicted gene 5506 Gene [Source:MGI Symbol;Acc:MGI:3648653]
ENSMUST00000091756	7	18	27543	0.0433508	Hist1h2bl	histone cluster 1, H2bl Gene [Source:MGI Symbol;Acc:MGI:2448403]
ENSMUST00000099956	7	18	27543	0.0433508	Gm8055	predicted pseudogene 8055 Pseudogene [Source:MGI Symbol;Acc:MGI:3643695]
ENSMUST00000113607	11	40	27543	0.0439857	Copg	coatomer protein complex, subunit gamma Gene [Source:MGI Symbol;Acc:MGI:1858696]
ENSMUST00000108338	3	3	27543	0.0479835	Tlcd1	TLC domain containing 1 Gene [Source:MGI Symbol;Acc:MGI:1915572]
ENSMUST00000120467	3	3	27543	0.0479835	Gm13537	predicted gene 13537 Pseudogene [Source:MGI Symbol;Acc:MGI:3651462]
ENSMUST00000106929	3	3	27543	0.0479835	Dnajc6	DnaJ (Hsp40) homolog, subfamily C, member 6 Gene [Source:MGI Symbol;Acc:MGI:1919935]
ENSMUST00000111097	3	3	27543	0.0479835	Fis1	fission 1 (mitochondrial outer membrane) homolog (yeast) Gene [Source:MGI Symbol;Acc:MGI:1913687]
ENSMUST00000113708	3	3	27543	0.0479835	Tia1	cytotoxic granule-associated RNA binding protein 1 Gene [Source:MGI Symbol;Acc:MGI:107914]
ENSMUST00000098751	4	6	27543	0.0518565	4933421E11Rik	RIKEN cDNA 4933421E11 gene Gene [Source:MGI Symbol;Acc:MGI:2445214]
ENSMUST00000077493	4	6	27543	0.0518565	Gm11270	predicted gene 11270 Pseudogene [Source:MGI Symbol;Acc:MGI:3649599]
ENSMUST00000108016	4	6	27543	0.0518565	Frem2	Fras1 related extracellular matrix protein 2 Gene [Source:MGI Symbol;Acc:MGI:2444465]
ENSMUST00000038304	4	6	27543	0.0518565	Gm6781	predicted gene 6781 Pseudogene [Source:MGI Symbol;Acc:MGI:3644510]
ENSMUST00000107562	6	14	27543	0.0518565	Cacnb1	calcium channel, voltage-dependent, beta 1 subunit Gene [Source:MGI Symbol;Acc:MGI:102522]
ENSMUST00000041589	4	6	27543	0.0518565	Tob1	transducer of ErbB-2.1 Gene [Source:MGI Symbol;Acc:MGI:1349721]
ENSMUST00000070777	6	14	27543	0.0518565	Traf7	TNF receptor-associated factor 7 Gene [Source:MGI Symbol;Acc:MGI:3042141]
ENSMUST00000116504	6	14	27543	0.0518565	NA	NA
ENSMUST00000091708	6	14	27543	0.0518565	AC160122.2	Histone H2A type 1-H [Source:UniProtKB/Swiss-Prot;Acc:Q8CGP6]
ENSMUST00000112264	6	14	27543	0.0518565	Atp2b4	ATPase, Ca++ transporting, plasma membrane 4 Gene [Source:MGI Symbol;Acc:MGI:88111]
ENSMUST00000105366	4	6	27543	0.0518565	Atp5d	ATP synthase, H+ transporting, mitochondrial F1 complex, delta subunit Gene [Source:MGI Symbol;Acc:MGI:1913293]
ENSMUST00000122157	4	6	27543	0.0518565	Gm12634	predicted gene 12634 Pseudogene [Source:MGI Symbol;Acc:MGI:3650769]
ENSMUST00000117402	4	6	27543	0.0518565	Gm7129	predicted gene 7129 Pseudogene [Source:MGI Symbol;Acc:MGI:3648820]
ENSMUST00000084097	6	14	27543	0.0518565	Aurkaip1	aurora kinase A interacting protein 1 Gene [Source:MGI Symbol;Acc:MGI:1913327]
ENSMUST00000070435	6	14	27543	0.0518565	Fabp3-ps1	fatty acid binding protein 3, muscle and heart, pseudogene 1 Pseudogene [Source:MGI Symbol;Acc:MGI:101929]
ENSMUST00000119379	4	6	27543	0.0518565	Ndufb2	NADH dehydrogenase (ubiquinone) 1 beta subcomplex, 2 Gene [Source:MGI Symbol;Acc:MGI:1915448]
ENSMUST00000103050	6	14	27543	0.0518565	Kcnq2	potassium voltage-gated channel, subfamily Q, member 2 Gene [Source:MGI Symbol;Acc:MGI:1309503]
ENSMUST00000021536	4	6	27543	0.0518565	Atp6v1d	ATPase, H+ transporting, lysosomal V1 subunit D Gene [Source:MGI Symbol;Acc:MGI:1921084]
ENSMUST00000022905	4	6	27543	0.0518565	Baalc	brain and acute leukemia, cytoplasmic Gene [Source:MGI Symbol;Acc:MGI:1928704]
ENSMUST00000117972	4	6	27543	0.0518565	Gm8482	predicted pseudogene 8482 Pseudogene [Source:MGI Symbol;Acc:MGI:3647858]
ENSMUST00000005406	6	14	27543	0.0518565	App	amyloid beta (A4) precursor protein Gene [Source:MGI Symbol;Acc:MGI:88059]
ENSMUST00000031003	4	6	27543	0.0518565	Ppp2r2c	protein phosphatase 2 (formerly 2A), regulatory subunit B (PR 52), gamma isoform Gene [Source:MGI Symbol;Acc:MGI:2442660]
ENSMUST00000120200	6	14	27543	0.0518565	Gm11557	predicted gene 11557 Pseudogene [Source:MGI Symbol;Acc:MGI:3651826]
ENSMUST00000043898	6	14	27543	0.0518565	Psenen	presenilin enhancer 2 homolog (C. elegans) Gene [Source:MGI Symbol;Acc:MGI:1913590]
ENSMUST00000109572	4	6	27543	0.0518565	Epb4.1l1	erythrocyte protein band 4.1-like 1 Gene [Source:MGI Symbol;Acc:MGI:103010]
ENSMUST00000100647	6	14	27543	0.0518565	Clip2	CAP-GLY domain containing linker protein 2 Gene [Source:MGI Symbol;Acc:MGI:1313136]
ENSMUST00000106113	6	14	27543	0.0518565	Foxk2	forkhead box K2 Gene [Source:MGI Symbol;Acc:MGI:1916087]
ENSMUST00000048953	6	14	27543	0.0518565	Atp2b4	ATPase, Ca++ transporting, plasma membrane 4 Gene [Source:MGI Symbol;Acc:MGI:88111]
ENSMUST00000118177	4	6	27543	0.0518565	Gm15294	predicted gene 15294 Pseudogene [Source:MGI Symbol;Acc:MGI:3708114]
ENSMUST00000049621	4	6	27543	0.0518565	Hes5	hairy and enhancer of split 5 (Drosophila) Gene [Source:MGI Symbol;Acc:MGI:104876]
ENSMUST00000097014	6	14	27543	0.0518565	Tuba1a	tubulin, alpha 1A Gene [Source:MGI Symbol;Acc:MGI:98869]
ENSMUST00000032402	6	14	27543	0.0518565	Bcat1	branched chain aminotransferase 1, cytosolic Gene [Source:MGI Symbol;Acc:MGI:104861]
ENSMUST00000069396	6	14	27543	0.0518565	Gnas	GNAS (guanine nucleotide binding protein, alpha stimulating) complex locus Gene [Source:MGI Symbol;Acc:MGI:95777]
ENSMUST00000071512	6	14	27543	0.0518565	Arid4b	AT rich interactive domain 4B (RBP1-like) Gene [Source:MGI Symbol;Acc:MGI:2137512]
ENSMUST00000118159	6	14	27543	0.0518565	Gramd1b	GRAM domain containing 1B Gene [Source:MGI Symbol;Acc:MGI:1925037]
ENSMUST00000078084	4	6	27543	0.0518565	D4Wsu53e	DNA segment, Chr 4, Wayne State University 53, expressed Gene [Source:MGI Symbol;Acc:MGI:106498]
ENSMUST00000097414	4	6	27543	0.0518565	Qk	quaking Gene [Source:MGI Symbol;Acc:MGI:97837]
ENSMUST00000041366	4	6	27543	0.0518565	Polr2j	polymerase (RNA) II (DNA directed) polypeptide J Gene [Source:MGI Symbol;Acc:MGI:109582]
ENSMUST00000117295	8	24	27543	0.052425	Rps2-ps13	ribosomal protein S2, pseudogene 13 Pseudogene [Source:MGI Symbol;Acc:MGI:3705640]
ENSMUST00000115196	8	24	27543	0.052425	Dlg1	discs, large homolog 1 (Drosophila) Gene [Source:MGI Symbol;Acc:MGI:107231]
ENSMUST00000093782	8	24	27543	0.052425	NA	NA
ENSMUST00000122292	7	19	27543	0.0550936	Gm9816	predicted pseudogene 9816 Pseudogene [Source:MGI Symbol;Acc:MGI:3704465]
ENSMUST00000084120	7	19	27543	0.0550936	NA	NA
ENSMUST00000119418	7	19	27543	0.0550936	Gm13464	predicted gene 13464 Pseudogene [Source:MGI Symbol;Acc:MGI:3649845]
ENSMUST00000114307	7	19	27543	0.0550936	Grin1	glutamate receptor, ionotropic, NMDA1 (zeta 1) Gene [Source:MGI Symbol;Acc:MGI:95819]
ENSMUST00000109480	7	19	27543	0.0550936	Ttll1	tubulin tyrosine ligase-like 1 Gene [Source:MGI Symbol;Acc:MGI:2443047]
ENSMUST00000092305	7	19	27543	0.0550936	Dazap1	DAZ associated protein 1 Gene [Source:MGI Symbol;Acc:MGI:1917498]
ENSMUST00000108192	5	10	27543	0.0552898	Polr2i	polymerase (RNA) II (DNA directed) polypeptide I Gene [Source:MGI Symbol;Acc:MGI:1917170]
ENSMUST00000108343	5	10	27543	0.0552898	Akt2	thymoma viral proto-oncogene 2 Gene [Source:MGI Symbol;Acc:MGI:104874]
ENSMUST00000119885	5	10	27543	0.0552898	Gm12727	predicted gene 12727 Pseudogene [Source:MGI Symbol;Acc:MGI:3649747]
ENSMUST00000111118	5	10	27543	0.0552898	Tcp11l1	t-complex 11 like 1 Gene [Source:MGI Symbol;Acc:MGI:2444263]
ENSMUST00000113012	5	10	27543	0.0552898	Ptprs	protein tyrosine phosphatase, receptor type, S Gene [Source:MGI Symbol;Acc:MGI:97815]
ENSMUST00000001989	5	10	27543	0.0552898	Uba1	ubiquitin-like modifier activating enzyme 1 Gene [Source:MGI Symbol;Acc:MGI:98890]
ENSMUST00000111247	5	10	27543	0.0552898	Pea15a	phosphoprotein enriched in astrocytes 15A Gene [Source:MGI Symbol;Acc:MGI:104799]
ENSMUST00000097274	5	10	27543	0.0552898	Prkce	protein kinase C, epsilon Gene [Source:MGI Symbol;Acc:MGI:97599]
ENSMUST00000107842	5	10	27543	0.0552898	Prmt1	protein arginine N-methyltransferase 1 Gene [Source:MGI Symbol;Acc:MGI:107846]
ENSMUST00000100740	5	10	27543	0.0552898	NA	NA
ENSMUST00000108443	5	10	27543	0.0552898	NA	NA
ENSMUST00000098862	5	10	27543	0.0552898	Atp6v0c	ATPase, H+ transporting, lysosomal V0 subunit C Gene [Source:MGI Symbol;Acc:MGI:88116]
ENSMUST00000117212	5	10	27543	0.0552898	Gm11401	predicted gene 11401 Pseudogene [Source:MGI Symbol;Acc:MGI:3649407]
ENSMUST00000089201	5	10	27543	0.0552898	Zfp442	zinc finger protein 442 Gene [Source:MGI Symbol;Acc:MGI:3651999]
ENSMUST00000039359	5	10	27543	0.0552898	Reps2	RALBP1 associated Eps domain containing protein 2 Gene [Source:MGI Symbol;Acc:MGI:2663511]
ENSMUST00000116444	5	10	27543	0.0552898	Hpca	hippocalcin Gene [Source:MGI Symbol;Acc:MGI:1336200]
ENSMUST00000037141	5	10	27543	0.0552898	Setd7	SET domain containing (lysine methyltransferase) 7 Gene [Source:MGI Symbol;Acc:MGI:1920501]
ENSMUST00000118481	5	10	27543	0.0552898	Gm12663	predicted gene 12663 Pseudogene [Source:MGI Symbol;Acc:MGI:3652168]
ENSMUST00000035785	5	10	27543	0.0552898	Ssr2	signal sequence receptor, beta Gene [Source:MGI Symbol;Acc:MGI:1913506]
ENSMUST00000006911	5	10	27543	0.0552898	Cdk4	cyclin-dependent kinase 4 Gene [Source:MGI Symbol;Acc:MGI:88357]
ENSMUST00000107839	5	10	27543	0.0552898	Prmt1	protein arginine N-methyltransferase 1 Gene [Source:MGI Symbol;Acc:MGI:107846]
ENSMUST00000055935	5	10	27543	0.0552898	Pcdhga11	protocadherin gamma subfamily A, 11 Gene [Source:MGI Symbol;Acc:MGI:1935228]
ENSMUST00000067538	5	10	27543	0.0552898	Ptprs	protein tyrosine phosphatase, receptor type, S Gene [Source:MGI Symbol;Acc:MGI:97815]
ENSMUST00000026495	5	10	27543	0.0552898	Atp5a1	ATP synthase, H+ transporting, mitochondrial F1 complex, alpha subunit 1 Gene [Source:MGI Symbol;Acc:MGI:88115]
ENSMUST00000110639	5	10	27543	0.0552898	Mtap1a	microtubule-associated protein 1 A Gene [Source:MGI Symbol;Acc:MGI:1306776]
ENSMUST00000085374	5	10	27543	0.0552898	Slc17a7	solute carrier family 17 (sodium-dependent inorganic phosphate cotransporter), member 7 Gene [Source:MGI Symbol;Acc:MGI:1920211]
ENSMUST00000095807	5	10	27543	0.0552898	Hpca	hippocalcin Gene [Source:MGI Symbol;Acc:MGI:1336200]
ENSMUST00000121222	5	10	27543	0.0552898	Gm5396	predicted pseudogene 5396 Pseudogene [Source:MGI Symbol;Acc:MGI:3646589]
ENSMUST00000100398	5	10	27543	0.0552898	Mpp2	membrane protein, palmitoylated 2 (MAGUK p55 subfamily member 2) Gene [Source:MGI Symbol;Acc:MGI:1858257]
ENSMUST00000108682	5	10	27543	0.0552898	Gas7	growth arrest specific 7 Gene [Source:MGI Symbol;Acc:MGI:1202388]
ENSMUST00000122384	5	10	27543	0.0552898	Mras	muscle and microspikes RAS Gene [Source:MGI Symbol;Acc:MGI:1100856]
ENSMUST00000114872	5	10	27543	0.0552898	Pacsin1	protein kinase C and casein kinase substrate in neurons 1 Gene [Source:MGI Symbol;Acc:MGI:1345181]
ENSMUST00000018087	5	10	27543	0.0552898	Gdap1l1	ganglioside-induced differentiation-associated protein 1-like 1 Gene [Source:MGI Symbol;Acc:MGI:2385163]
ENSMUST00000108681	5	10	27543	0.0552898	Gas7	growth arrest specific 7 Gene [Source:MGI Symbol;Acc:MGI:1202388]
ENSMUST00000087871	5	10	27543	0.0552898	Gnas	GNAS (guanine nucleotide binding protein, alpha stimulating) complex locus Gene [Source:MGI Symbol;Acc:MGI:95777]
ENSMUST00000041318	5	10	27543	0.0552898	Ndrg4	N-myc downstream regulated gene 4 Gene [Source:MGI Symbol;Acc:MGI:2384590]
ENSMUST00000108740	8	25	27543	0.0641559	Gm10358	predicted gene 10358 Pseudogene [Source:MGI Symbol;Acc:MGI:3708786]
ENSMUST00000122433	7	20	27543	0.0688962	Gm14148	predicted gene 14148 Pseudogene [Source:MGI Symbol;Acc:MGI:3651554]
ENSMUST00000118642	7	20	27543	0.0688962	Gm7331	predicted gene 7331 Pseudogene [Source:MGI Symbol;Acc:MGI:3644702]
ENSMUST00000078766	6	15	27543	0.0688962	Rps27a-ps2	ribosomal protein S27A, pseudogene 2 Pseudogene [Source:MGI Symbol;Acc:MGI:3643614]
ENSMUST00000090778	6	15	27543	0.0688962	Hist2h4	histone cluster 2, H4 Gene [Source:MGI Symbol;Acc:MGI:2140113]
ENSMUST00000106140	6	15	27543	0.0688962	Prkacb	protein kinase, cAMP dependent, catalytic, beta Gene [Source:MGI Symbol;Acc:MGI:97594]
ENSMUST00000112334	6	15	27543	0.0688962	Reps2	RALBP1 associated Eps domain containing protein 2 Gene [Source:MGI Symbol;Acc:MGI:2663511]
ENSMUST00000114310	7	20	27543	0.0688962	Grin1	glutamate receptor, ionotropic, NMDA1 (zeta 1) Gene [Source:MGI Symbol;Acc:MGI:95819]
ENSMUST00000117071	7	20	27543	0.0688962	Gm11249	predicted gene 11249 Pseudogene [Source:MGI Symbol;Acc:MGI:3650834]
ENSMUST00000066140	6	15	27543	0.0688962	Pcdhga11	protocadherin gamma subfamily A, 11 Gene [Source:MGI Symbol;Acc:MGI:1935228]
ENSMUST00000075275	6	15	27543	0.0688962	Nell2	NEL-like 2 (chicken) Gene [Source:MGI Symbol;Acc:MGI:1858510]
ENSMUST00000073722	9	31	27543	0.0688962	Gm10073	predicted pseudogene 10073 Pseudogene [Source:MGI Symbol;Acc:MGI:3641908]
ENSMUST00000028377	22	121	27543	0.0688962	Scn2a1	sodium channel, voltage-gated, type II, alpha 1 Gene [Source:MGI Symbol;Acc:MGI:98248]
ENSMUST00000080103	7	20	27543	0.0688962	NA	NA
ENSMUST00000046260	6	15	27543	0.0688962	AU022252	expressed sequence AU022252 Gene [Source:MGI Symbol;Acc:MGI:2140466]
ENSMUST00000086799	10	37	27543	0.0688962	Rpl15-ps2	ribosomal protein L15, pseudogene 2 Pseudogene [Source:MGI Symbol;Acc:MGI:3648255]
ENSMUST00000064204	7	20	27543	0.0688962	Actn2	actinin alpha 2 Gene [Source:MGI Symbol;Acc:MGI:109192]
ENSMUST00000081256	7	20	27543	0.0688962	Gm11531	predicted gene 11531 Pseudogene [Source:MGI Symbol;Acc:MGI:3650260]
ENSMUST00000112097	6	15	27543	0.0688962	Rnf10	ring finger protein 10 Gene [Source:MGI Symbol;Acc:MGI:1859162]
ENSMUST00000116298	8	26	27543	0.0818431	Rnf220	ring finger protein 220 Gene [Source:MGI Symbol;Acc:MGI:1913993]
ENSMUST00000097873	5	11	27543	0.0843211	C77080	expressed sequence C77080 Gene [Source:MGI Symbol;Acc:MGI:2140651]
ENSMUST00000079084	5	11	27543	0.0843211	NA	NA
ENSMUST00000066149	5	11	27543	0.0843211	Pcdhga11	protocadherin gamma subfamily A, 11 Gene [Source:MGI Symbol;Acc:MGI:1935228]
ENSMUST00000018295	5	11	27543	0.0843211	Pick1	protein interacting with C kinase 1 Gene [Source:MGI Symbol;Acc:MGI:894645]
ENSMUST00000071500	5	11	27543	0.0843211	Dpp6	dipeptidylpeptidase 6 Gene [Source:MGI Symbol;Acc:MGI:94921]
ENSMUST00000101197	5	11	27543	0.0843211	Arhgap25	Rho GTPase activating protein 25 Gene [Source:MGI Symbol;Acc:MGI:2443687]
ENSMUST00000111627	5	11	27543	0.0843211	Mobp	myelin-associated oligodendrocytic basic protein Gene [Source:MGI Symbol;Acc:MGI:108511]
ENSMUST00000079773	5	11	27543	0.0843211	Csnk1g2	casein kinase 1, gamma 2 Gene [Source:MGI Symbol;Acc:MGI:1920014]
ENSMUST00000109236	5	11	27543	0.0843211	Stau1	staufen (RNA binding protein) homolog 1 (Drosophila) Gene [Source:MGI Symbol;Acc:MGI:1338864]
ENSMUST00000101102	5	11	27543	0.0843211	Reps2	RALBP1 associated Eps domain containing protein 2 Gene [Source:MGI Symbol;Acc:MGI:2663511]
ENSMUST00000108193	5	11	27543	0.0843211	Polr2i	polymerase (RNA) II (DNA directed) polypeptide I Gene [Source:MGI Symbol;Acc:MGI:1917170]
ENSMUST00000031423	5	11	27543	0.0843211	Atp2a2	ATPase, Ca++ transporting, cardiac muscle, slow twitch 2 Gene [Source:MGI Symbol;Acc:MGI:88110]
ENSMUST00000023116	5	11	27543	0.0843211	Aco2	aconitase 2, mitochondrial Gene [Source:MGI Symbol;Acc:MGI:87880]
ENSMUST00000086596	5	11	27543	0.0843211	Gm10191	predicted pseudogene 10191 Pseudogene [Source:MGI Symbol;Acc:MGI:3704195]
ENSMUST00000040555	5	11	27543	0.0843211	Rnf10	ring finger protein 10 Gene [Source:MGI Symbol;Acc:MGI:1859162]
ENSMUST00000102968	5	11	27543	0.0843211	Hist1h4d	histone cluster 1, H4d Gene [Source:MGI Symbol;Acc:MGI:2448423]
ENSMUST00000102982	5	11	27543	0.0843211	Hist1h2bp	histone cluster 1, H2bp Gene [Source:MGI Symbol;Acc:MGI:2448409]
ENSMUST00000025127	5	11	27543	0.0843211	Mapre2	microtubule-associated protein, RP/EB family, member 2 Gene [Source:MGI Symbol;Acc:MGI:106271]
ENSMUST00000032934	5	11	27543	0.0843211	Aldoa	aldolase A, fructose-bisphosphate Gene [Source:MGI Symbol;Acc:MGI:87994]
ENSMUST00000094639	5	11	27543	0.0843211	Mtap1a	microtubule-associated protein 1 A Gene [Source:MGI Symbol;Acc:MGI:1306776]
ENSMUST00000019882	5	11	27543	0.0843211	Polr2i	polymerase (RNA) II (DNA directed) polypeptide I Gene [Source:MGI Symbol;Acc:MGI:1917170]
ENSMUST00000103123	5	11	27543	0.0843211	Rprd1b	regulation of nuclear pre-mRNA domain containing 1B Gene [Source:MGI Symbol;Acc:MGI:1917720]
ENSMUST00000028162	5	11	27543	0.0843211	Ptges2	prostaglandin E synthase 2 Gene [Source:MGI Symbol;Acc:MGI:1917592]
ENSMUST00000016530	5	11	27543	0.0843211	Mpped2	metallophosphoesterase domain containing 2 Gene [Source:MGI Symbol;Acc:MGI:1924265]
ENSMUST00000025037	5	11	27543	0.0843211	Ptprs	protein tyrosine phosphatase, receptor type, S Gene [Source:MGI Symbol;Acc:MGI:97815]
ENSMUST00000114335	5	11	27543	0.0843211	Add1	adducin 1 (alpha) Gene [Source:MGI Symbol;Acc:MGI:87918]
ENSMUST00000122453	5	11	27543	0.0843211	Gm12017	predicted gene 12017 Pseudogene [Source:MGI Symbol;Acc:MGI:3651377]
ENSMUST00000069686	5	11	27543	0.0843211	Rnf180	ring finger protein 180 Gene [Source:MGI Symbol;Acc:MGI:1919066]
ENSMUST00000055923	5	11	27543	0.0843211	Olfr710	olfactory receptor 710 Gene [Source:MGI Symbol;Acc:MGI:3030544]
ENSMUST00000054237	5	11	27543	0.0843211	Dclk1	doublecortin-like kinase 1 Gene [Source:MGI Symbol;Acc:MGI:1330861]
ENSMUST00000023361	4	7	27543	0.0843643	Pdxdc1	pyridoxal-dependent decarboxylase domain containing 1 Gene [Source:MGI Symbol;Acc:MGI:1920909]
ENSMUST00000121570	4	7	27543	0.0843643	Gm8178	predicted gene 8178 Pseudogene [Source:MGI Symbol;Acc:MGI:3646475]
ENSMUST00000006750	4	7	27543	0.0843643	Rundc3a	RUN domain containing 3A Gene [Source:MGI Symbol;Acc:MGI:1858752]
ENSMUST00000102544	4	7	27543	0.0843643	Srsf10	serine/arginine-rich splicing factor 10 Gene [Source:MGI Symbol;Acc:MGI:1333805]
ENSMUST00000093962	4	7	27543	0.0843643	Ccnd1	cyclin D1 Gene [Source:MGI Symbol;Acc:MGI:88313]
ENSMUST00000121555	4	7	27543	0.0843643	Rpl18-ps1	ribosomal protein L18, pseudogene 1 Pseudogene [Source:MGI Symbol;Acc:MGI:98018]
ENSMUST00000117764	4	7	27543	0.0843643	NA	NA
ENSMUST00000109928	4	7	27543	0.0843643	NA	NA
ENSMUST00000082429	4	7	27543	0.0843643	Gpx1	glutathione peroxidase 1 Gene [Source:MGI Symbol;Acc:MGI:104887]
ENSMUST00000114330	4	7	27543	0.0843643	Vps52	vacuolar protein sorting 52 (yeast) Gene [Source:MGI Symbol;Acc:MGI:1330304]
ENSMUST00000105387	4	7	27543	0.0843643	Agpat3	1-acylglycerol-3-phosphate O-acyltransferase 3 Gene [Source:MGI Symbol;Acc:MGI:1336186]
ENSMUST00000118035	7	21	27543	0.0843643	Gm11942	predicted gene 11942 Pseudogene [Source:MGI Symbol;Acc:MGI:3650608]
ENSMUST00000119277	4	7	27543	0.0843643	Gm13155	predicted gene 13155 Pseudogene [Source:MGI Symbol;Acc:MGI:3651982]
ENSMUST00000119472	4	7	27543	0.0843643	Mras	muscle and microspikes RAS Gene [Source:MGI Symbol;Acc:MGI:1100856]
ENSMUST00000039904	4	7	27543	0.0843643	Camk2a	calcium/calmodulin-dependent protein kinase II alpha Gene [Source:MGI Symbol;Acc:MGI:88256]
ENSMUST00000121282	7	21	27543	0.0843643	Gm12508	predicted gene 12508 Pseudogene [Source:MGI Symbol;Acc:MGI:3651359]
ENSMUST00000094175	7	21	27543	0.0843643	Gm10291	predicted pseudogene 10291 Pseudogene [Source:MGI Symbol;Acc:MGI:3641638]
ENSMUST00000075152	7	21	27543	0.0843643	Gm4945	predicted gene 4945 Gene [Source:MGI Symbol;Acc:MGI:3647512]
ENSMUST00000028025	4	7	27543	0.0843643	NA	NA
ENSMUST00000111147	7	21	27543	0.0843643	Caprin1	cell cycle associated protein 1 Gene [Source:MGI Symbol;Acc:MGI:1858234]
ENSMUST00000111030	4	7	27543	0.0843643	Enah	enabled homolog (Drosophila) Gene [Source:MGI Symbol;Acc:MGI:108360]
ENSMUST00000065957	4	7	27543	0.0843643	Syt5	synaptotagmin V Gene [Source:MGI Symbol;Acc:MGI:1926368]
ENSMUST00000028719	4	7	27543	0.0843643	Plcb1	phospholipase C, beta 1 Gene [Source:MGI Symbol;Acc:MGI:97613]
ENSMUST00000113222	4	7	27543	0.0843643	Stxbp1	syntaxin binding protein 1 Gene [Source:MGI Symbol;Acc:MGI:107363]
ENSMUST00000119582	4	7	27543	0.0843643	Kbtbd8	kelch repeat and BTB (POZ) domain containing 8 Gene [Source:MGI Symbol;Acc:MGI:2661430]
ENSMUST00000033170	4	7	27543	0.0843643	Mrpl17	mitochondrial ribosomal protein L17 Gene [Source:MGI Symbol;Acc:MGI:1351608]
ENSMUST00000114196	4	7	27543	0.0843643	H2-Ab1	histocompatibility 2, class II antigen A, beta 1 Gene [Source:MGI Symbol;Acc:MGI:103070]
ENSMUST00000113086	4	7	27543	0.0843643	Rabepk	Rab9 effector protein with kelch motifs Gene [Source:MGI Symbol;Acc:MGI:2139530]
ENSMUST00000078756	7	21	27543	0.0843643	Hist2h2aa2	histone cluster 2, H2aa2 Gene [Source:MGI Symbol;Acc:MGI:2448283]
ENSMUST00000091741	7	21	27543	0.0843643	Hist1h2ag	histone cluster 1, H2ag Gene [Source:MGI Symbol;Acc:MGI:2448293]
ENSMUST00000027451	6	16	27543	0.0870683	Epha4	Eph receptor A4 Gene [Source:MGI Symbol;Acc:MGI:98277]
ENSMUST00000029588	6	16	27543	0.0870683	Larp7	La ribonucleoprotein domain family, member 7 Gene [Source:MGI Symbol;Acc:MGI:107634]
ENSMUST00000036374	6	16	27543	0.0870683	Phb	prohibitin Gene [Source:MGI Symbol;Acc:MGI:97572]
ENSMUST00000100847	6	16	27543	0.0870683	Gm13826	predicted pseudogene 13826 Pseudogene [Source:MGI Symbol;Acc:MGI:3651519]
ENSMUST00000027404	6	16	27543	0.0870683	Ptprn	protein tyrosine phosphatase, receptor type, N Gene [Source:MGI Symbol;Acc:MGI:102765]
ENSMUST00000105372	6	16	27543	0.0870683	Gpx4	glutathione peroxidase 4 Gene [Source:MGI Symbol;Acc:MGI:104767]
ENSMUST00000106625	6	16	27543	0.0870683	5330417C22Rik	RIKEN cDNA 5330417C22 gene Gene [Source:MGI Symbol;Acc:MGI:1923930]
ENSMUST00000025023	6	16	27543	0.0870683	Luc7l	Luc7 homolog (S. cerevisiae)-like Gene [Source:MGI Symbol;Acc:MGI:1914228]
ENSMUST00000006751	6	16	27543	0.0870683	Slc4a3	solute carrier family 4 (anion exchanger), member 3 Gene [Source:MGI Symbol;Acc:MGI:109350]
ENSMUST00000046513	6	16	27543	0.0870683	Phyhipl	phytanoyl-CoA hydroxylase interacting protein-like Gene [Source:MGI Symbol;Acc:MGI:1918161]
ENSMUST00000019220	6	16	27543	0.0870683	Strn4	striatin, calmodulin binding protein 4 Gene [Source:MGI Symbol;Acc:MGI:2142346]
ENSMUST00000075180	6	16	27543	0.0870683	Baiap2	brain-specific angiogenesis inhibitor 1-associated protein 2 Gene [Source:MGI Symbol;Acc:MGI:2137336]
ENSMUST00000103047	6	16	27543	0.0870683	Kcnq2	potassium voltage-gated channel, subfamily Q, member 2 Gene [Source:MGI Symbol;Acc:MGI:1309503]
ENSMUST00000119373	6	16	27543	0.0870683	Gramd1b	GRAM domain containing 1B Gene [Source:MGI Symbol;Acc:MGI:1925037]
ENSMUST00000076410	6	16	27543	0.0870683	Hsph1	heat shock 105kDa/110kDa protein 1 Gene [Source:MGI Symbol;Acc:MGI:105053]
ENSMUST00000119262	6	16	27543	0.0870683	Gm12944	predicted gene 12944 Pseudogene [Source:MGI Symbol;Acc:MGI:3650498]
ENSMUST00000074574	6	16	27543	0.0870683	Unc5cl	unc-5 homolog C (C. elegans)-like Gene [Source:MGI Symbol;Acc:MGI:1923839]
ENSMUST00000118924	9	33	27543	0.0932197	Gm14934	predicted gene 14934 Pseudogene [Source:MGI Symbol;Acc:MGI:3802129]
ENSMUST00000065483	9	33	27543	0.0932197	Ppp2r5c	protein phosphatase 2, regulatory subunit B (B56), gamma isoform Gene [Source:MGI Symbol;Acc:MGI:1349475]
ENSMUST00000111386	6	17	27543	0.10901	Rxrg	retinoid X receptor gamma Gene [Source:MGI Symbol;Acc:MGI:98216]
ENSMUST00000005292	3	4	27543	0.10901	Prdx2	peroxiredoxin 2 Gene [Source:MGI Symbol;Acc:MGI:109486]
ENSMUST00000087876	5	12	27543	0.10901	Gnas	GNAS (guanine nucleotide binding protein, alpha stimulating) complex locus Gene [Source:MGI Symbol;Acc:MGI:95777]
ENSMUST00000097275	6	17	27543	0.10901	Prkce	protein kinase C, epsilon Gene [Source:MGI Symbol;Acc:MGI:97599]
ENSMUST00000031903	6	17	27543	0.10901	Ephb6	Eph receptor B6 Gene [Source:MGI Symbol;Acc:MGI:1096338]
ENSMUST00000049149	9	34	27543	0.10901	Lrp1	low density lipoprotein receptor-related protein 1 Gene [Source:MGI Symbol;Acc:MGI:96828]
ENSMUST00000105629	5	12	27543	0.10901	Ski	ski sarcoma viral oncogene homolog (avian) Gene [Source:MGI Symbol;Acc:MGI:98310]
ENSMUST00000061514	5	12	27543	0.10901	Rai2	retinoic acid induced 2 Gene [Source:MGI Symbol;Acc:MGI:1344378]
ENSMUST00000069520	5	12	27543	0.10901	Syp	synaptophysin Gene [Source:MGI Symbol;Acc:MGI:98467]
ENSMUST00000023882	5	12	27543	0.10901	Sympk	symplekin Gene [Source:MGI Symbol;Acc:MGI:1915438]
ENSMUST00000120218	3	4	27543	0.10901	Shisa5	shisa homolog 5 (Xenopus laevis) Gene [Source:MGI Symbol;Acc:MGI:1915044]
ENSMUST00000119731	5	12	27543	0.10901	Gm4986	predicted pseudogene 4986 Pseudogene [Source:MGI Symbol;Acc:MGI:3647545]
ENSMUST00000015712	5	12	27543	0.10901	Lpl	lipoprotein lipase Gene [Source:MGI Symbol;Acc:MGI:96820]
ENSMUST00000115364	5	12	27543	0.10901	Cdk16	cyclin-dependent kinase 16 Gene [Source:MGI Symbol;Acc:MGI:97516]
ENSMUST00000032889	5	12	27543	0.10901	Pde2a	phosphodiesterase 2A, cGMP-stimulated Gene [Source:MGI Symbol;Acc:MGI:2446107]
ENSMUST00000024869	5	12	27543	0.10901	Spast	spastin Gene [Source:MGI Symbol;Acc:MGI:1858896]
ENSMUST00000042296	5	12	27543	0.10901	Qk	quaking Gene [Source:MGI Symbol;Acc:MGI:97837]
ENSMUST00000095472	6	17	27543	0.10901	NA	NA
ENSMUST00000076473	5	12	27543	0.10901	NA	NA
ENSMUST00000122068	5	12	27543	0.10901	Gm11960	predicted gene 11960 Pseudogene [Source:MGI Symbol;Acc:MGI:3652301]
ENSMUST00000080149	6	17	27543	0.10901	Eno1	enolase 1, alpha non-neuron Gene [Source:MGI Symbol;Acc:MGI:95393]
ENSMUST00000114976	6	17	27543	0.10901	Luc7l	Luc7 homolog (S. cerevisiae)-like Gene [Source:MGI Symbol;Acc:MGI:1914228]
ENSMUST00000106332	5	12	27543	0.10901	Sez6l2	seizure related 6 homolog like 2 Gene [Source:MGI Symbol;Acc:MGI:2385295]
ENSMUST00000081119	5	12	27543	0.10901	NA	NA
ENSMUST00000109084	5	12	27543	0.10901	Gnas	GNAS (guanine nucleotide binding protein, alpha stimulating) complex locus Gene [Source:MGI Symbol;Acc:MGI:95777]
ENSMUST00000008179	5	12	27543	0.10901	Mid1ip1	Mid1 interacting protein 1 (gastrulation specific G12-like (zebrafish)) Gene [Source:MGI Symbol;Acc:MGI:1915291]
ENSMUST00000029542	5	12	27543	0.10901	Ints3	integrator complex subunit 3 Gene [Source:MGI Symbol;Acc:MGI:2140050]
ENSMUST00000066794	6	17	27543	0.10901	Zfp534	zinc finger protein 534 Gene [Source:MGI Symbol;Acc:MGI:3650650]
ENSMUST00000119862	3	4	27543	0.10901	Gm13207	predicted gene 13207 Pseudogene [Source:MGI Symbol;Acc:MGI:3651232]
ENSMUST00000108950	5	12	27543	0.10901	6430548M08Rik	RIKEN cDNA 6430548M08 gene Gene [Source:MGI Symbol;Acc:MGI:2443793]
ENSMUST00000058265	5	12	27543	0.10901	C1galt1c1	C1GALT1-specific chaperone 1 Gene [Source:MGI Symbol;Acc:MGI:1913493]
ENSMUST00000094329	6	17	27543	0.10901	Elmo2	engulfment and cell motility 2, ced-12 homolog (C. elegans) Gene [Source:MGI Symbol;Acc:MGI:2153045]
ENSMUST00000113707	5	12	27543	0.10901	Tpm1	tropomyosin 1, alpha Gene [Source:MGI Symbol;Acc:MGI:98809]
ENSMUST00000118792	3	4	27543	0.10901	Gm12117	predicted gene 12117 Pseudogene [Source:MGI Symbol;Acc:MGI:3652019]
ENSMUST00000032921	6	17	27543	0.10901	Sez6l2	seizure related 6 homolog like 2 Gene [Source:MGI Symbol;Acc:MGI:2385295]
ENSMUST00000058914	6	17	27543	0.10901	Tuba1c	tubulin, alpha 1C Gene [Source:MGI Symbol;Acc:MGI:1095409]
ENSMUST00000067911	3	4	27543	0.10901	Fzd10	frizzled homolog 10 (Drosophila) Gene [Source:MGI Symbol;Acc:MGI:2136761]
ENSMUST00000113226	6	17	27543	0.10901	Drp2	dystrophin related protein 2 Gene [Source:MGI Symbol;Acc:MGI:107432]
ENSMUST00000121866	5	12	27543	0.10901	Gm13007	predicted gene 13007 Pseudogene [Source:MGI Symbol;Acc:MGI:3649722]
ENSMUST00000093050	5	12	27543	0.10901	Tcf25	transcription factor 25 (basic helix-loop-helix) Gene [Source:MGI Symbol;Acc:MGI:1914105]
ENSMUST00000121723	5	12	27543	0.10901	Mapk8ip3	mitogen-activated protein kinase 8 interacting protein 3 Gene [Source:MGI Symbol;Acc:MGI:1353598]
ENSMUST00000078369	7	22	27543	0.10901	Hist1h2ab	histone cluster 1, H2ab Gene [Source:MGI Symbol;Acc:MGI:2448306]
ENSMUST00000101044	5	12	27543	0.10901	Atp2b2	ATPase, Ca++ transporting, plasma membrane 2 Gene [Source:MGI Symbol;Acc:MGI:105368]
ENSMUST00000112751	7	22	27543	0.10901	Bcl2	B-cell leukemia/lymphoma 2 Gene [Source:MGI Symbol;Acc:MGI:88138]
ENSMUST00000092523	5	12	27543	0.10901	Gm10712	predicted gene 10712 Gene [Source:MGI Symbol;Acc:MGI:3809043]
ENSMUST00000105508	5	12	27543	0.10901	Zbtb24	zinc finger and BTB domain containing 24 Gene [Source:MGI Symbol;Acc:MGI:3039618]
ENSMUST00000057934	5	12	27543	0.10901	Tcf25	transcription factor 25 (basic helix-loop-helix) Gene [Source:MGI Symbol;Acc:MGI:1914105]
ENSMUST00000004786	5	12	27543	0.10901	Polr2e	polymerase (RNA) II (DNA directed) polypeptide E Gene [Source:MGI Symbol;Acc:MGI:1913670]
ENSMUST00000110009	5	12	27543	0.10901	Arc	activity regulated cytoskeletal-associated protein Gene [Source:MGI Symbol;Acc:MGI:88067]
ENSMUST00000103021	6	17	27543	0.10901	Baiap2	brain-specific angiogenesis inhibitor 1-associated protein 2 Gene [Source:MGI Symbol;Acc:MGI:2137336]
ENSMUST00000075768	5	12	27543	0.10901	Gm6055	predicted gene 6055 Pseudogene [Source:MGI Symbol;Acc:MGI:3648620]
ENSMUST00000103051	6	17	27543	0.10901	Kcnq2	potassium voltage-gated channel, subfamily Q, member 2 Gene [Source:MGI Symbol;Acc:MGI:1309503]
ENSMUST00000118280	5	12	27543	0.10901	Gng5	guanine nucleotide binding protein (G protein), gamma 5 Gene [Source:MGI Symbol;Acc:MGI:109164]
ENSMUST00000110615	5	12	27543	0.10901	Serf2	small EDRK-rich factor 2 Gene [Source:MGI Symbol;Acc:MGI:1337041]
ENSMUST00000003360	5	12	27543	0.10901	Car11	carbonic anhydrase 11 Gene [Source:MGI Symbol;Acc:MGI:1336193]
ENSMUST00000120873	5	12	27543	0.10901	Gm13932	predicted gene 13932 Pseudogene [Source:MGI Symbol;Acc:MGI:3650981]
ENSMUST00000099046	3	4	27543	0.10901	Gm10718	predicted gene 10718 Gene [Source:MGI Symbol;Acc:MGI:3642028]
ENSMUST00000056328	6	17	27543	0.10901	Rnf26	ring finger protein 26 Gene [Source:MGI Symbol;Acc:MGI:2388131]
ENSMUST00000080771	5	12	27543	0.10901	Zbtb24	zinc finger and BTB domain containing 24 Gene [Source:MGI Symbol;Acc:MGI:3039618]
ENSMUST00000120919	3	4	27543	0.10901	Gm12900	predicted gene 12900 Pseudogene [Source:MGI Symbol;Acc:MGI:3650387]
ENSMUST00000105741	5	12	27543	0.10901	Gm13225	predicted gene 13225 Gene [Source:MGI Symbol;Acc:MGI:3652161]
ENSMUST00000120261	5	12	27543	0.10901	Camta2	calmodulin binding transcription activator 2 Gene [Source:MGI Symbol;Acc:MGI:2135957]
ENSMUST00000117538	5	12	27543	0.10901	Gm11996	predicted gene 11996 Pseudogene [Source:MGI Symbol;Acc:MGI:3650898]
ENSMUST00000122262	3	4	27543	0.10901	Gm6298	predicted gene 6298 Pseudogene [Source:MGI Symbol;Acc:MGI:3645163]
ENSMUST00000119771	3	4	27543	0.10901	Gm11198	predicted gene 11198 Pseudogene [Source:MGI Symbol;Acc:MGI:3649956]
ENSMUST00000059354	5	12	27543	0.10901	Sigmar1	sigma non-opioid intracellular receptor 1 Gene [Source:MGI Symbol;Acc:MGI:1195268]
ENSMUST00000108344	6	17	27543	0.10901	Akt2	thymoma viral proto-oncogene 2 Gene [Source:MGI Symbol;Acc:MGI:104874]
ENSMUST00000107196	7	22	27543	0.10901	Dlg2	discs, large homolog 2 (Drosophila) Gene [Source:MGI Symbol;Acc:MGI:1344351]
ENSMUST00000101331	5	12	27543	0.10901	Rtn1	reticulon 1 Gene [Source:MGI Symbol;Acc:MGI:1933947]
ENSMUST00000067036	5	12	27543	0.10901	Bsg	basigin Gene [Source:MGI Symbol;Acc:MGI:88208]
ENSMUST00000006175	5	12	27543	0.10901	Slc8a2	solute carrier family 8 (sodium/calcium exchanger), member 2 Gene [Source:MGI Symbol;Acc:MGI:107996]
ENSMUST00000006726	5	12	27543	0.10901	NA	NA
ENSMUST00000071488	5	12	27543	0.10901	Ints3	integrator complex subunit 3 Gene [Source:MGI Symbol;Acc:MGI:2140050]
ENSMUST00000117214	3	4	27543	0.10901	Gm13870	predicted gene 13870 Pseudogene [Source:MGI Symbol;Acc:MGI:3650544]
ENSMUST00000097596	4	8	27543	0.121855	R3hdm1	R3H domain 1 (binds single-stranded nucleic acids) Gene [Source:MGI Symbol;Acc:MGI:2448514]
ENSMUST00000100656	4	8	27543	0.121855	NA	NA
ENSMUST00000096304	4	8	27543	0.121855	Panx2	pannexin 2 Gene [Source:MGI Symbol;Acc:MGI:1890615]
ENSMUST00000084575	4	8	27543	0.121855	38231	septin 4 Gene [Source:MGI Symbol;Acc:MGI:1270156]
ENSMUST00000034199	4	8	27543	0.121855	NA	NA
ENSMUST00000085018	4	8	27543	0.121855	Ip6k2	inositol hexaphosphate kinase 2 Gene [Source:MGI Symbol;Acc:MGI:1923750]
ENSMUST00000063091	4	8	27543	0.121855	Fyn	Fyn proto-oncogene Gene [Source:MGI Symbol;Acc:MGI:95602]
ENSMUST00000102866	7	23	27543	0.121855	Set	SET nuclear oncogene Gene [Source:MGI Symbol;Acc:MGI:1860267]
ENSMUST00000061326	4	8	27543	0.121855	Uqcrq	ubiquinol-cytochrome c reductase, complex III subunit VII Gene [Source:MGI Symbol;Acc:MGI:107807]
ENSMUST00000063314	4	8	27543	0.121855	Gtf2a1	general transcription factor II A, 1 Gene [Source:MGI Symbol;Acc:MGI:1933277]
ENSMUST00000063084	4	8	27543	0.121855	Xbp1	X-box binding protein 1 Gene [Source:MGI Symbol;Acc:MGI:98970]
ENSMUST00000111709	4	8	27543	0.121855	Kras	v-Ki-ras2 Kirsten rat sarcoma viral oncogene homolog Gene [Source:MGI Symbol;Acc:MGI:96680]
ENSMUST00000120855	4	8	27543	0.121855	Gm15190	predicted gene 15190 Pseudogene [Source:MGI Symbol;Acc:MGI:3705630]
ENSMUST00000119120	4	8	27543	0.121855	Camta2	calmodulin binding transcription activator 2 Gene [Source:MGI Symbol;Acc:MGI:2135957]
ENSMUST00000026221	4	8	27543	0.121855	Scd2	stearoyl-Coenzyme A desaturase 2 Gene [Source:MGI Symbol;Acc:MGI:98240]
ENSMUST00000103062	4	8	27543	0.121855	Rgs9	regulator of G-protein signaling 9 Gene [Source:MGI Symbol;Acc:MGI:1338824]
ENSMUST00000108299	4	8	27543	0.121855	Pdp1	pyruvate dehyrogenase phosphatase catalytic subunit 1 Gene [Source:MGI Symbol;Acc:MGI:2685870]
ENSMUST00000113875	4	8	27543	0.121855	Ttc3	tetratricopeptide repeat domain 3 Gene [Source:MGI Symbol;Acc:MGI:1276539]
ENSMUST00000105592	4	8	27543	0.121855	Aurkaip1	aurora kinase A interacting protein 1 Gene [Source:MGI Symbol;Acc:MGI:1913327]
ENSMUST00000015157	4	8	27543	0.121855	Trappc2l	trafficking protein particle complex 2-like Gene [Source:MGI Symbol;Acc:MGI:1916295]
ENSMUST00000026142	4	8	27543	0.121855	Maged1	melanoma antigen, family D, 1 Gene [Source:MGI Symbol;Acc:MGI:1930187]
ENSMUST00000046893	4	8	27543	0.121855	Gpr162	G protein-coupled receptor 162 Gene [Source:MGI Symbol;Acc:MGI:1315214]
ENSMUST00000105367	4	8	27543	0.121855	Atp5d	ATP synthase, H+ transporting, mitochondrial F1 complex, delta subunit Gene [Source:MGI Symbol;Acc:MGI:1913293]
ENSMUST00000120014	8	29	27543	0.121855	Gm13292	predicted gene 13292 Pseudogene [Source:MGI Symbol;Acc:MGI:3649470]
ENSMUST00000022954	4	8	27543	0.121855	Khdrbs3	KH domain containing, RNA binding, signal transduction associated 3 Gene [Source:MGI Symbol;Acc:MGI:1313312]
ENSMUST00000112656	4	8	27543	0.121855	Synpr	synaptoporin Gene [Source:MGI Symbol;Acc:MGI:1919253]
ENSMUST00000114957	4	8	27543	0.121855	NA	NA
ENSMUST00000078505	4	8	27543	0.121855	Rtn1	reticulon 1 Gene [Source:MGI Symbol;Acc:MGI:1933947]
ENSMUST00000122030	4	8	27543	0.121855	Gm14334	predicted gene 14334 Pseudogene [Source:MGI Symbol;Acc:MGI:3649938]
ENSMUST00000107045	4	8	27543	0.121855	Plekhb1	pleckstrin homology domain containing, family B (evectins) member 1 Gene [Source:MGI Symbol;Acc:MGI:1351469]
ENSMUST00000111665	4	8	27543	0.121855	Tmx2	thioredoxin-related transmembrane protein 2 Gene [Source:MGI Symbol;Acc:MGI:1914208]
ENSMUST00000036288	4	8	27543	0.121855	R3hdm1	R3H domain 1 (binds single-stranded nucleic acids) Gene [Source:MGI Symbol;Acc:MGI:2448514]
ENSMUST00000001083	4	8	27543	0.121855	Nhp2	NHP2 ribonucleoprotein homolog (yeast) Gene [Source:MGI Symbol;Acc:MGI:1098547]
ENSMUST00000060354	4	8	27543	0.121855	NA	NA
ENSMUST00000001331	7	23	27543	0.121855	Myg1	melanocyte proliferating gene 1 Gene [Source:MGI Symbol;Acc:MGI:1929864]
ENSMUST00000010751	4	8	27543	0.121855	Pigyl	phosphatidylinositol glycan anchor biosynthesis, class Y-like Gene [Source:MGI Symbol;Acc:MGI:1913518]
ENSMUST00000062117	4	8	27543	0.121855	Rap2a	RAS related protein 2a Gene [Source:MGI Symbol;Acc:MGI:97855]
ENSMUST00000067744	4	8	27543	0.121855	Cggbp1	CGG triplet repeat binding protein 1 Gene [Source:MGI Symbol;Acc:MGI:2146370]
ENSMUST00000023039	4	8	27543	0.121855	St13	suppression of tumorigenicity 13 Gene [Source:MGI Symbol;Acc:MGI:1917606]
ENSMUST00000072119	7	23	27543	0.121855	Ccnb1	cyclin B1 Gene [Source:MGI Symbol;Acc:MGI:88302]
ENSMUST00000025767	4	8	27543	0.121855	Aip	aryl-hydrocarbon receptor-interacting protein Gene [Source:MGI Symbol;Acc:MGI:109622]
ENSMUST00000068976	4	8	27543	0.121855	NA	NA
ENSMUST00000106246	4	8	27543	0.121855	Hpcal4	hippocalcin-like 4 Gene [Source:MGI Symbol;Acc:MGI:2157521]
ENSMUST00000109085	4	8	27543	0.121855	Gnas	GNAS (guanine nucleotide binding protein, alpha stimulating) complex locus Gene [Source:MGI Symbol;Acc:MGI:95777]
ENSMUST00000109494	4	8	27543	0.121855	Homer1	homer homolog 1 (Drosophila) Gene [Source:MGI Symbol;Acc:MGI:1347345]
ENSMUST00000020932	4	8	27543	0.121855	Prkar1a	protein kinase, cAMP dependent regulatory, type I, alpha Gene [Source:MGI Symbol;Acc:MGI:104878]
ENSMUST00000050712	4	8	27543	0.121855	Fkbp1a	FK506 binding protein 1a Gene [Source:MGI Symbol;Acc:MGI:95541]
ENSMUST00000044970	4	8	27543	0.121855	Mgat3	mannoside acetylglucosaminyltransferase 3 Gene [Source:MGI Symbol;Acc:MGI:104532]
ENSMUST00000084149	7	23	27543	0.121855	Gm13139	predicted gene 13139 Gene [Source:MGI Symbol;Acc:MGI:3701604]
ENSMUST00000078432	7	23	27543	0.121855	Rpl28	ribosomal protein L28 Gene [Source:MGI Symbol;Acc:MGI:101839]
ENSMUST00000120287	7	23	27543	0.121855	Gm11533	predicted gene 11533 Pseudogene [Source:MGI Symbol;Acc:MGI:3651874]
ENSMUST00000116442	4	8	27543	0.121855	Hpca	hippocalcin Gene [Source:MGI Symbol;Acc:MGI:1336200]
ENSMUST00000055276	4	8	27543	0.121855	Olfr225	olfactory receptor 225 Gene [Source:MGI Symbol;Acc:MGI:3030059]
ENSMUST00000034953	4	8	27543	0.121855	Znhit1	zinc finger, HIT domain containing 1 Gene [Source:MGI Symbol;Acc:MGI:1917353]
ENSMUST00000093959	4	8	27543	0.121855	NA	NA
ENSMUST00000103218	4	8	27543	0.121855	Rffl	ring finger and FYVE like domain containing protein Gene [Source:MGI Symbol;Acc:MGI:1914588]
ENSMUST00000118353	4	8	27543	0.121855	Kif3a	kinesin family member 3A Gene [Source:MGI Symbol;Acc:MGI:107689]
ENSMUST00000121800	6	18	27543	0.136272	Gm8880	predicted gene 8880 Pseudogene [Source:MGI Symbol;Acc:MGI:3648900]
ENSMUST00000090782	6	18	27543	0.136272	Hist2h2ac	histone cluster 2, H2ac Gene [Source:MGI Symbol;Acc:MGI:2448316]
ENSMUST00000110475	6	18	27543	0.136272	NA	NA
ENSMUST00000114318	6	18	27543	0.136272	Grin1	glutamate receptor, ionotropic, NMDA1 (zeta 1) Gene [Source:MGI Symbol;Acc:MGI:95819]
ENSMUST00000118417	6	18	27543	0.136272	Gm14130	predicted gene 14130 Pseudogene [Source:MGI Symbol;Acc:MGI:3652217]
ENSMUST00000114747	6	18	27543	0.136272	Otof	otoferlin Gene [Source:MGI Symbol;Acc:MGI:1891247]
ENSMUST00000024647	6	18	27543	0.136272	Pde10a	phosphodiesterase 10A Gene [Source:MGI Symbol;Acc:MGI:1345143]
ENSMUST00000091709	6	18	27543	0.136272	Hist1h2bn	histone cluster 1, H2bn Gene [Source:MGI Symbol;Acc:MGI:2448407]
ENSMUST00000026750	6	18	27543	0.136272	Cnksr2	connector enhancer of kinase suppressor of Ras 2 Gene [Source:MGI Symbol;Acc:MGI:2661175]
ENSMUST00000102795	6	18	27543	0.136272	Ublcp1	ubiquitin-like domain containing CTD phosphatase 1 Gene [Source:MGI Symbol;Acc:MGI:1933105]
ENSMUST00000073177	5	13	27543	0.138793	Gm16381	predicted gene 16381 Gene [Source:MGI Symbol;Acc:MGI:3648256]
ENSMUST00000039144	5	13	27543	0.138793	Clstn1	calsyntenin 1 Gene [Source:MGI Symbol;Acc:MGI:1929895]
ENSMUST00000064054	5	13	27543	0.138793	Syt1	synaptotagmin I Gene [Source:MGI Symbol;Acc:MGI:99667]
ENSMUST00000024636	5	13	27543	0.138793	Fgfr1op	Fgfr1 oncogene partner Gene [Source:MGI Symbol;Acc:MGI:1922546]
ENSMUST00000023241	5	13	27543	0.138793	Ly6h	lymphocyte antigen 6 complex, locus H Gene [Source:MGI Symbol;Acc:MGI:1346030]
ENSMUST00000092966	5	13	27543	0.138793	Dynlt1c	dynein light chain Tctex-type 1C Gene [Source:MGI Symbol;Acc:MGI:3807476]
ENSMUST00000110116	5	13	27543	0.138793	Plcb1	phospholipase C, beta 1 Gene [Source:MGI Symbol;Acc:MGI:97613]
ENSMUST00000091609	5	13	27543	0.138793	Cltb	clathrin, light polypeptide (Lcb) Gene [Source:MGI Symbol;Acc:MGI:1921575]
ENSMUST00000082300	5	13	27543	0.138793	Gm8399	predicted gene 8399 Pseudogene [Source:MGI Symbol;Acc:MGI:3647971]
ENSMUST00000120015	5	13	27543	0.138793	Gm6461	predicted gene 6461 Pseudogene [Source:MGI Symbol;Acc:MGI:3643881]
ENSMUST00000074046	5	13	27543	0.138793	Elmo2	engulfment and cell motility 2, ced-12 homolog (C. elegans) Gene [Source:MGI Symbol;Acc:MGI:2153045]
ENSMUST00000036003	5	13	27543	0.138793	Klhdc5	kelch domain containing 5 Gene [Source:MGI Symbol;Acc:MGI:2444786]
ENSMUST00000045896	5	13	27543	0.138793	Pacsin1	protein kinase C and casein kinase substrate in neurons 1 Gene [Source:MGI Symbol;Acc:MGI:1345181]
ENSMUST00000099723	5	13	27543	0.138793	Madd	MAP-kinase activating death domain Gene [Source:MGI Symbol;Acc:MGI:2444672]
ENSMUST00000077381	5	13	27543	0.138793	Gm9354	predicted gene 9354 Pseudogene [Source:MGI Symbol;Acc:MGI:3647598]
ENSMUST00000071699	5	13	27543	0.138793	Elmo2	engulfment and cell motility 2, ced-12 homolog (C. elegans) Gene [Source:MGI Symbol;Acc:MGI:2153045]
ENSMUST00000031589	5	13	27543	0.138793	NA	NA
ENSMUST00000086783	5	13	27543	0.138793	Atrnl1	attractin like 1 Gene [Source:MGI Symbol;Acc:MGI:2147749]
ENSMUST00000095717	5	13	27543	0.138793	Gm4795	predicted pseudogene 4795 Pseudogene [Source:MGI Symbol;Acc:MGI:3646519]
ENSMUST00000028905	5	13	27543	0.138793	Pcsk2	proprotein convertase subtilisin/kexin type 2 Gene [Source:MGI Symbol;Acc:MGI:97512]
ENSMUST00000089906	5	13	27543	0.138793	C230055K05Rik	RIKEN cDNA C230055K05 gene Gene [Source:MGI Symbol;Acc:MGI:2441896]
ENSMUST00000111943	5	13	27543	0.138793	Mapk8	mitogen-activated protein kinase 8 Gene [Source:MGI Symbol;Acc:MGI:1346861]
ENSMUST00000105161	5	13	27543	0.138793	Gm2001	predicted gene 2001 Gene [Source:MGI Symbol;Acc:MGI:3780171]
ENSMUST00000113685	5	13	27543	0.138793	Tpm1	tropomyosin 1, alpha Gene [Source:MGI Symbol;Acc:MGI:98809]
ENSMUST00000000811	5	13	27543	0.138793	Kcnn3	potassium intermediate/small conductance calcium-activated channel, subfamily N, member 3 Gene [Source:MGI Symbol;Acc:MGI:2153183]
ENSMUST00000059255	5	13	27543	0.138793	Atrnl1	attractin like 1 Gene [Source:MGI Symbol;Acc:MGI:2147749]
ENSMUST00000090779	9	36	27543	0.138793	Hist2h3c1	histone cluster 2, H3c1 Gene [Source:MGI Symbol;Acc:MGI:2448355]
ENSMUST00000047734	5	13	27543	0.138793	Zfp281	zinc finger protein 281 Gene [Source:MGI Symbol;Acc:MGI:3029290]
ENSMUST00000067444	5	13	27543	0.138793	Gfap	glial fibrillary acidic protein Gene [Source:MGI Symbol;Acc:MGI:95697]
ENSMUST00000085837	5	13	27543	0.138793	NA	NA
ENSMUST00000025163	5	13	27543	0.138793	H2-Ke2	H2-K region expressed gene 2 Gene [Source:MGI Symbol;Acc:MGI:95908]
ENSMUST00000121787	5	13	27543	0.138793	Mapk8ip3	mitogen-activated protein kinase 8 interacting protein 3 Gene [Source:MGI Symbol;Acc:MGI:1353598]
ENSMUST00000027777	5	13	27543	0.138793	Parp1	poly (ADP-ribose) polymerase family, member 1 Gene [Source:MGI Symbol;Acc:MGI:1340806]
ENSMUST00000102589	8	30	27543	0.14284	Eif4a1	eukaryotic translation initiation factor 4A1 Gene [Source:MGI Symbol;Acc:MGI:95303]
ENSMUST00000071282	7	24	27543	0.143241	Gm3222	predicted pseudogene 3222 Pseudogene [Source:MGI Symbol;Acc:MGI:3781401]
ENSMUST00000031352	7	24	27543	0.143241	G3bp2	GTPase activating protein (SH3 domain) binding protein 2 Gene [Source:MGI Symbol;Acc:MGI:2442040]
ENSMUST00000093046	11	50	27543	0.150741	Tom1l2	target of myb1-like 2 (chicken) Gene [Source:MGI Symbol;Acc:MGI:2443306]
ENSMUST00000043757	6	19	27543	0.172176	Abcf1	ATP-binding cassette, sub-family F (GCN20), member 1 Gene [Source:MGI Symbol;Acc:MGI:1351658]
ENSMUST00000105275	6	19	27543	0.172176	Osbpl8	oxysterol binding protein-like 8 Gene [Source:MGI Symbol;Acc:MGI:2443807]
ENSMUST00000105734	6	19	27543	0.172176	Gm13157	predicted gene 13157 Gene [Source:MGI Symbol;Acc:MGI:3651978]
ENSMUST00000044783	6	19	27543	0.172176	Eif4g1	eukaryotic translation initiation factor 4, gamma 1 Gene [Source:MGI Symbol;Acc:MGI:2384784]
ENSMUST00000118761	6	19	27543	0.172176	Gm14292	predicted gene 14292 Pseudogene [Source:MGI Symbol;Acc:MGI:3649964]
ENSMUST00000117491	6	19	27543	0.172176	Gm14336	predicted gene 14336 Pseudogene [Source:MGI Symbol;Acc:MGI:3649933]
ENSMUST00000081000	6	19	27543	0.172176	Gm14292	predicted gene 14292 Pseudogene [Source:MGI Symbol;Acc:MGI:3649964]
ENSMUST00000114308	6	19	27543	0.172176	Grin1	glutamate receptor, ionotropic, NMDA1 (zeta 1) Gene [Source:MGI Symbol;Acc:MGI:95819]
ENSMUST00000089085	6	19	27543	0.172176	Pde10a	phosphodiesterase 10A Gene [Source:MGI Symbol;Acc:MGI:1345143]
ENSMUST00000040683	6	19	27543	0.172176	NA	NA
ENSMUST00000120104	4	9	27543	0.176092	Gm12129	predicted gene 12129 Pseudogene [Source:MGI Symbol;Acc:MGI:3651508]
ENSMUST00000111945	5	14	27543	0.176092	Mapk8	mitogen-activated protein kinase 8 Gene [Source:MGI Symbol;Acc:MGI:1346861]
ENSMUST00000078393	5	14	27543	0.176092	Gm16514	predicted gene, Gm16514 Pseudogene [Source:MGI Symbol;Acc:MGI:4356345]
ENSMUST00000120911	5	14	27543	0.176092	Gm12416	predicted gene 12416 Pseudogene [Source:MGI Symbol;Acc:MGI:3650588]
ENSMUST00000109088	4	9	27543	0.176092	Gnas	GNAS (guanine nucleotide binding protein, alpha stimulating) complex locus Gene [Source:MGI Symbol;Acc:MGI:95777]
ENSMUST00000047963	4	9	27543	0.176092	Rabepk	Rab9 effector protein with kelch motifs Gene [Source:MGI Symbol;Acc:MGI:2139530]
ENSMUST00000118366	4	9	27543	0.176092	Mtch1	mitochondrial carrier homolog 1 (C. elegans) Gene [Source:MGI Symbol;Acc:MGI:1929261]
ENSMUST00000115614	5	14	27543	0.176092	Arvcf	armadillo repeat gene deleted in velo-cardio-facial syndrome Gene [Source:MGI Symbol;Acc:MGI:109620]
ENSMUST00000122404	5	14	27543	0.176092	Gm14150	predicted gene 14150 Pseudogene [Source:MGI Symbol;Acc:MGI:3651006]
ENSMUST00000018710	4	9	27543	0.176092	Slc2a4	solute carrier family 2 (facilitated glucose transporter), member 4 Gene [Source:MGI Symbol;Acc:MGI:95758]
ENSMUST00000101097	5	14	27543	0.176092	Gm5943	predicted pseudogene 5943 Pseudogene [Source:MGI Symbol;Acc:MGI:3646004]
ENSMUST00000016491	5	14	27543	0.176092	Kcnq2	potassium voltage-gated channel, subfamily Q, member 2 Gene [Source:MGI Symbol;Acc:MGI:1309503]
ENSMUST00000113500	5	14	27543	0.176092	Men1	multiple endocrine neoplasia 1 Gene [Source:MGI Symbol;Acc:MGI:1316736]
ENSMUST00000021162	5	14	27543	0.176092	NA	NA
ENSMUST00000106333	5	14	27543	0.176092	Sez6l2	seizure related 6 homolog like 2 Gene [Source:MGI Symbol;Acc:MGI:2385295]
ENSMUST00000020608	5	14	27543	0.176092	Ppp2ca	protein phosphatase 2 (formerly 2A), catalytic subunit, alpha isoform Gene [Source:MGI Symbol;Acc:MGI:1321159]
ENSMUST00000090269	4	9	27543	0.176092	Actc1	actin, alpha, cardiac muscle 1 Gene [Source:MGI Symbol;Acc:MGI:87905]
ENSMUST00000109590	7	25	27543	0.176092	NA	NA
ENSMUST00000088345	5	14	27543	0.176092	Mapk8ip3	mitogen-activated protein kinase 8 interacting protein 3 Gene [Source:MGI Symbol;Acc:MGI:1353598]
ENSMUST00000090314	5	14	27543	0.176092	Dgki	diacylglycerol kinase, iota Gene [Source:MGI Symbol;Acc:MGI:2443430]
ENSMUST00000085228	5	14	27543	0.176092	Ube2nl	ubiquitin-conjugating enzyme E2N-like Pseudogene [Source:MGI Symbol;Acc:MGI:3643295]
ENSMUST00000113504	5	14	27543	0.176092	Men1	multiple endocrine neoplasia 1 Gene [Source:MGI Symbol;Acc:MGI:1316736]
ENSMUST00000109102	4	9	27543	0.176092	Cdyl2	chromodomain protein, Y chromosome-like 2 Gene [Source:MGI Symbol;Acc:MGI:1923046]
ENSMUST00000105814	4	9	27543	0.176092	Mul1	mitochondrial ubiquitin ligase activator of NFKB 1 Gene [Source:MGI Symbol;Acc:MGI:1915600]
ENSMUST00000091935	5	14	27543	0.176092	Pcdhga11	protocadherin gamma subfamily A, 11 Gene [Source:MGI Symbol;Acc:MGI:1935228]
ENSMUST00000100003	4	9	27543	0.176092	Mrpl23-ps1	mitichondrial ribosomal protein L23, pseudogene 1 Gene [Source:MGI Symbol;Acc:MGI:3650679]
ENSMUST00000119554	4	9	27543	0.176092	Gm9439	predicted gene 9439 Pseudogene [Source:MGI Symbol;Acc:MGI:3645164]
ENSMUST00000030757	4	9	27543	0.176092	Fbxo42	F-box protein 42 Gene [Source:MGI Symbol;Acc:MGI:1924992]
ENSMUST00000115618	5	14	27543	0.176092	Arvcf	armadillo repeat gene deleted in velo-cardio-facial syndrome Gene [Source:MGI Symbol;Acc:MGI:109620]
ENSMUST00000097360	5	14	27543	0.176092	Pacsin1	protein kinase C and casein kinase substrate in neurons 1 Gene [Source:MGI Symbol;Acc:MGI:1345181]
ENSMUST00000032196	4	9	27543	0.176092	Arl8b	ADP-ribosylation factor-like 8B Gene [Source:MGI Symbol;Acc:MGI:1914416]
ENSMUST00000039577	4	9	27543	0.176092	Zfp51	zinc finger protein 51 Gene [Source:MGI Symbol;Acc:MGI:99198]
ENSMUST00000114392	4	9	27543	0.176092	NA	NA
ENSMUST00000111878	5	14	27543	0.176092	Eps8	epidermal growth factor receptor pathway substrate 8 Gene [Source:MGI Symbol;Acc:MGI:104684]
ENSMUST00000035664	5	14	27543	0.176092	Dnm1	dynamin 1 Gene [Source:MGI Symbol;Acc:MGI:107384]
ENSMUST00000048967	5	14	27543	0.176092	Cpe	carboxypeptidase E Gene [Source:MGI Symbol;Acc:MGI:101932]
ENSMUST00000109733	4	9	27543	0.176092	Prdx2	peroxiredoxin 2 Gene [Source:MGI Symbol;Acc:MGI:109486]
ENSMUST00000110180	4	9	27543	0.176092	Smox	spermine oxidase Gene [Source:MGI Symbol;Acc:MGI:2445356]
ENSMUST00000004673	4	9	27543	0.176092	Ndrg2	N-myc downstream regulated gene 2 Gene [Source:MGI Symbol;Acc:MGI:1352498]
ENSMUST00000067362	4	9	27543	0.176092	B3gat1	beta-1,3-glucuronyltransferase 1 (glucuronosyltransferase P) Gene [Source:MGI Symbol;Acc:MGI:1924148]
ENSMUST00000031823	5	14	27543	0.176092	Herc3	hect domain and RLD 3 Gene [Source:MGI Symbol;Acc:MGI:1921248]
ENSMUST00000117838	5	14	27543	0.176092	Gm13226	predicted gene 13226 Pseudogene [Source:MGI Symbol;Acc:MGI:3651282]
ENSMUST00000109065	5	14	27543	0.176092	Vdac1	voltage-dependent anion channel 1 Gene [Source:MGI Symbol;Acc:MGI:106919]
ENSMUST00000031085	4	9	27543	0.176092	Klhl5	kelch-like 5 (Drosophila) Gene [Source:MGI Symbol;Acc:MGI:1919028]
ENSMUST00000052836	4	9	27543	0.176092	Add1	adducin 1 (alpha) Gene [Source:MGI Symbol;Acc:MGI:87918]
ENSMUST00000107604	7	25	27543	0.176092	Gm12537	predicted gene 12537 Pseudogene [Source:MGI Symbol;Acc:MGI:3650720]
ENSMUST00000070215	5	14	27543	0.176092	Npm3	nucleoplasmin 3 Gene [Source:MGI Symbol;Acc:MGI:894653]
ENSMUST00000050581	7	25	27543	0.176092	Gm5069	predicted pseudogene 5069 Pseudogene [Source:MGI Symbol;Acc:MGI:3644516]
ENSMUST00000041616	4	9	27543	0.176092	Pdxk	pyridoxal (pyridoxine, vitamin B6) kinase Gene [Source:MGI Symbol;Acc:MGI:1351869]
ENSMUST00000117732	5	14	27543	0.176092	Gm11185	predicted gene 11185 Pseudogene [Source:MGI Symbol;Acc:MGI:3650877]
ENSMUST00000057633	4	9	27543	0.176092	Tas2r119	taste receptor, type 2, member 119 Gene [Source:MGI Symbol;Acc:MGI:2681253]
ENSMUST00000025444	4	9	27543	0.176092	Cxxc1	CXXC finger 1 (PHD domain) Gene [Source:MGI Symbol;Acc:MGI:1921572]
ENSMUST00000115228	5	14	27543	0.176092	Mapk8ip3	mitogen-activated protein kinase 8 interacting protein 3 Gene [Source:MGI Symbol;Acc:MGI:1353598]
ENSMUST00000016125	5	14	27543	0.176092	Stk32c	serine/threonine kinase 32C Gene [Source:MGI Symbol;Acc:MGI:2385336]
ENSMUST00000103302	5	14	27543	0.176092	Gm16955	predicted gene, 16955 Gene [Source:MGI Symbol;Acc:MGI:4439879]
ENSMUST00000021523	4	9	27543	0.176092	Mnat1	menage a trois 1 Gene [Source:MGI Symbol;Acc:MGI:106207]
ENSMUST00000045682	5	14	27543	0.176092	Gramd1b	GRAM domain containing 1B Gene [Source:MGI Symbol;Acc:MGI:1925037]
ENSMUST00000115269	4	9	27543	0.176092	B3gat1	beta-1,3-glucuronyltransferase 1 (glucuronosyltransferase P) Gene [Source:MGI Symbol;Acc:MGI:1924148]
ENSMUST00000118182	5	14	27543	0.176092	Gm5944	predicted gene 5944 Pseudogene [Source:MGI Symbol;Acc:MGI:3646005]
ENSMUST00000092988	5	14	27543	0.176092	NA	NA
ENSMUST00000023090	5	14	27543	0.176092	Nell2	NEL-like 2 (chicken) Gene [Source:MGI Symbol;Acc:MGI:1858510]
ENSMUST00000041500	5	14	27543	0.176092	Srxn1	sulfiredoxin 1 homolog (S. cerevisiae) Gene [Source:MGI Symbol;Acc:MGI:104971]
ENSMUST00000071982	4	9	27543	0.176092	Bmper	BMP-binding endothelial regulator Gene [Source:MGI Symbol;Acc:MGI:1920480]
ENSMUST00000059305	4	9	27543	0.176092	Snrpn	small nuclear ribonucleoprotein N Gene [Source:MGI Symbol;Acc:MGI:98347]
ENSMUST00000107771	4	9	27543	0.176092	Ruvbl2	RuvB-like protein 2 Gene [Source:MGI Symbol;Acc:MGI:1342299]
ENSMUST00000105691	5	14	27543	0.176092	Clstn1	calsyntenin 1 Gene [Source:MGI Symbol;Acc:MGI:1929895]
ENSMUST00000115409	4	9	27543	0.176092	Pdpk1	3-phosphoinositide dependent protein kinase 1 Gene [Source:MGI Symbol;Acc:MGI:1338068]
ENSMUST00000075657	4	9	27543	0.176092	Ap3s2	adaptor-related protein complex 3, sigma 2 subunit Gene [Source:MGI Symbol;Acc:MGI:1337060]
ENSMUST00000077945	4	9	27543	0.176092	Rps15	ribosomal protein S15 Gene [Source:MGI Symbol;Acc:MGI:98117]
ENSMUST00000099636	4	9	27543	0.176092	Actg-ps1	actin, gamma, pseudogene 1 Pseudogene [Source:MGI Symbol;Acc:MGI:87907]
ENSMUST00000112237	5	14	27543	0.176092	Adipor1	adiponectin receptor 1 Gene [Source:MGI Symbol;Acc:MGI:1919924]
ENSMUST00000109838	4	9	27543	0.176092	Ntrk2	neurotrophic tyrosine kinase, receptor, type 2 Gene [Source:MGI Symbol;Acc:MGI:97384]
ENSMUST00000114286	5	14	27543	0.176092	Herc3	hect domain and RLD 3 Gene [Source:MGI Symbol;Acc:MGI:1921248]
ENSMUST00000097530	4	9	27543	0.176092	Mbd1	methyl-CpG binding domain protein 1 Gene [Source:MGI Symbol;Acc:MGI:1333811]
ENSMUST00000007800	4	9	27543	0.176092	Arpp19	cAMP-regulated phosphoprotein 19 Gene [Source:MGI Symbol;Acc:MGI:1891691]
ENSMUST00000033230	4	9	27543	0.176092	Tha1	threonine aldolase 1 Gene [Source:MGI Symbol;Acc:MGI:1919026]
ENSMUST00000107867	4	9	27543	0.176092	Tom1l1	target of myb1-like 1 (chicken) Gene [Source:MGI Symbol;Acc:MGI:1919193]
ENSMUST00000119957	4	9	27543	0.176092	Gm7689	predicted pseudogene 7689 Pseudogene [Source:MGI Symbol;Acc:MGI:3645866]
ENSMUST00000069592	4	9	27543	0.176092	Neb	nebulin Gene [Source:MGI Symbol;Acc:MGI:97292]
ENSMUST00000111212	5	14	27543	0.176092	Slc1a2	solute carrier family 1 (glial high affinity glutamate transporter), member 2 Gene [Source:MGI Symbol;Acc:MGI:101931]
ENSMUST00000079800	4	9	27543	0.176092	1700054O19Rik	RIKEN cDNA 1700054O19 gene Gene [Source:MGI Symbol;Acc:MGI:1921522]
ENSMUST00000111880	5	14	27543	0.176092	NA	NA
ENSMUST00000014065	4	9	27543	0.176092	Clip3	CAP-GLY domain containing linker protein 3 Gene [Source:MGI Symbol;Acc:MGI:1923936]
ENSMUST00000037049	3	5	27543	0.180515	Lzts1	leucine zipper, putative tumor suppressor 1 Gene [Source:MGI Symbol;Acc:MGI:2684762]
ENSMUST00000021033	3	5	27543	0.180515	Rad51l3	RAD51-like 3 (S. cerevisiae) Gene [Source:MGI Symbol;Acc:MGI:1261809]
ENSMUST00000054276	3	5	27543	0.180515	NA	NA
ENSMUST00000037218	3	5	27543	0.180515	Rasl10a	RAS-like, family 10, member A Gene [Source:MGI Symbol;Acc:MGI:1922918]
ENSMUST00000107457	3	5	27543	0.180515	NA	NA
ENSMUST00000065161	3	5	27543	0.180515	NA	NA
ENSMUST00000103301	3	5	27543	0.180515	Igk-V	immunoglobulin kappa chain complex variable region Complex/Cluster/Region [Source:MGI Symbol;Acc:MGI:96499]
ENSMUST00000082244	3	5	27543	0.180515	Olfr57	olfactory receptor 57 Gene [Source:MGI Symbol;Acc:MGI:1333808]
ENSMUST00000051308	3	5	27543	0.180515	Micalcl	MICAL C-terminal like Gene [Source:MGI Symbol;Acc:MGI:1918127]
ENSMUST00000022697	3	5	27543	0.180515	Fgf17	fibroblast growth factor 17 Gene [Source:MGI Symbol;Acc:MGI:1202401]
ENSMUST00000121568	3	5	27543	0.180515	Gm6977	predicted gene 6977 Pseudogene [Source:MGI Symbol;Acc:MGI:3647597]
ENSMUST00000116649	3	5	27543	0.180515	Gm12419	predicted gene 12419 Pseudogene [Source:MGI Symbol;Acc:MGI:3650581]
ENSMUST00000006764	3	5	27543	0.180515	Aprt	adenine phosphoribosyl transferase Gene [Source:MGI Symbol;Acc:MGI:88061]
ENSMUST00000107458	3	5	27543	0.180515	Rgma	RGM domain family, member A Gene [Source:MGI Symbol;Acc:MGI:2679262]
ENSMUST00000119765	3	5	27543	0.180515	Gm9431	predicted gene 9431 Pseudogene [Source:MGI Symbol;Acc:MGI:3648373]
ENSMUST00000080058	3	5	27543	0.180515	Egln2	EGL nine homolog 2 (C. elegans) Gene [Source:MGI Symbol;Acc:MGI:1932287]
ENSMUST00000120411	3	5	27543	0.180515	Fam107a	family with sequence similarity 107, member A Gene [Source:MGI Symbol;Acc:MGI:3041256]
ENSMUST00000054320	3	5	27543	0.180515	NA	NA
ENSMUST00000093264	3	5	27543	0.180515	Papola	poly (A) polymerase alpha Gene [Source:MGI Symbol;Acc:MGI:109301]
ENSMUST00000110395	3	5	27543	0.180515	Max	Max protein Gene [Source:MGI Symbol;Acc:MGI:96921]
ENSMUST00000088666	3	5	27543	0.180515	3110035E14Rik	RIKEN cDNA 3110035E14 gene Gene [Source:MGI Symbol;Acc:MGI:1924232]
ENSMUST00000027677	3	5	27543	0.180515	Csrp1	cysteine and glycine-rich protein 1 Gene [Source:MGI Symbol;Acc:MGI:88549]
ENSMUST00000118937	3	5	27543	0.180515	Gm13228	predicted gene 13228 Pseudogene [Source:MGI Symbol;Acc:MGI:3651932]
ENSMUST00000039866	6	20	27543	0.197372	4933407C03Rik	RIKEN cDNA 4933407C03 gene Gene [Source:MGI Symbol;Acc:MGI:1921690]
ENSMUST00000119928	6	20	27543	0.197372	Luc7l	Luc7 homolog (S. cerevisiae)-like Gene [Source:MGI Symbol;Acc:MGI:1914228]
ENSMUST00000110576	6	20	27543	0.197372	AC126035.2
ENSMUST00000076317	6	20	27543	0.197372	Gm10293	predicted pseudogene 10293 Pseudogene [Source:MGI Symbol;Acc:MGI:3704216]
ENSMUST00000109848	6	20	27543	0.197372	Wars	tryptophanyl-tRNA synthetase Gene [Source:MGI Symbol;Acc:MGI:104630]
ENSMUST00000019676	4	10	27543	0.214913	Csnk1g2	casein kinase 1, gamma 2 Gene [Source:MGI Symbol;Acc:MGI:1920014]
ENSMUST00000020440	4	10	27543	0.214913	Timm13	translocase of inner mitochondrial membrane 13 homolog (yeast) Gene [Source:MGI Symbol;Acc:MGI:1353432]
ENSMUST00000118352	5	15	27543	0.214913	Gm12618	predicted gene 12618 Pseudogene [Source:MGI Symbol;Acc:MGI:3649881]
ENSMUST00000072779	5	15	27543	0.214913	Gm5805	predicted gene 5805 Gene [Source:MGI Symbol;Acc:MGI:3644633]
ENSMUST00000036999	5	15	27543	0.214913	Clip2	CAP-GLY domain containing linker protein 2 Gene [Source:MGI Symbol;Acc:MGI:1313136]
ENSMUST00000112536	5	15	27543	0.214913	2310001H12Rik	RIKEN cDNA 2310001H12 gene Gene [Source:MGI Symbol;Acc:MGI:1916754]
ENSMUST00000119949	2	2	27543	0.214913	Gm9844	predicted pseudogene 9844 Pseudogene [Source:MGI Symbol;Acc:MGI:3704288]
ENSMUST00000046908	4	10	27543	0.214913	3230401D17Rik	RIKEN cDNA 3230401D17 gene Gene [Source:MGI Symbol;Acc:MGI:1913930]
ENSMUST00000102812	5	15	27543	0.214913	Mbp	myelin basic protein Gene [Source:MGI Symbol;Acc:MGI:96925]
ENSMUST00000099462	4	10	27543	0.214913	Gng7	guanine nucleotide binding protein (G protein), gamma 7 Gene [Source:MGI Symbol;Acc:MGI:95787]
ENSMUST00000031565	4	10	27543	0.214913	Fscn1	fascin homolog 1, actin bundling protein (Strongylocentrotus purpuratus) Gene [Source:MGI Symbol;Acc:MGI:1352745]
ENSMUST00000116599	5	15	27543	0.214913	NA	NA
ENSMUST00000119446	2	2	27543	0.214913	Gm11794	predicted gene 11794 Pseudogene [Source:MGI Symbol;Acc:MGI:3650853]
ENSMUST00000095510	5	15	27543	0.214913	Gm4027	predicted gene 4027 Gene [Source:MGI Symbol;Acc:MGI:3782201]
ENSMUST00000118230	4	10	27543	0.214913	Gm8129	predicted pseudogene 8129 Pseudogene [Source:MGI Symbol;Acc:MGI:3646863]
ENSMUST00000093138	5	15	27543	0.214913	Tbc1d9b	TBC1 domain family, member 9B Gene [Source:MGI Symbol;Acc:MGI:1924045]
ENSMUST00000073448	5	15	27543	0.214913	Sema3b	sema domain, immunoglobulin domain (Ig), short basic domain, secreted, (semaphorin) 3B Gene [Source:MGI Symbol;Acc:MGI:107561]
ENSMUST00000119200	2	2	27543	0.214913	Prdm15	PR domain containing 15 Gene [Source:MGI Symbol;Acc:MGI:1930121]
ENSMUST00000085876	2	2	27543	0.214913	E430029J22Rik	RIKEN cDNA E430029J22 gene Gene [Source:MGI Symbol;Acc:MGI:2442822]
ENSMUST00000078137	5	15	27543	0.214913	Men1	multiple endocrine neoplasia 1 Gene [Source:MGI Symbol;Acc:MGI:1316736]
ENSMUST00000109492	4	10	27543	0.214913	Homer1	homer homolog 1 (Drosophila) Gene [Source:MGI Symbol;Acc:MGI:1347345]
ENSMUST00000032088	4	10	27543	0.214913	Zfml	zinc finger, matrin-like Gene [Source:MGI Symbol;Acc:MGI:1203484]
ENSMUST00000115813	4	10	27543	0.214913	Snx29	sorting nexin 29 Gene [Source:MGI Symbol;Acc:MGI:1921728]
ENSMUST00000076807	4	10	27543	0.214913	Pcdhga11	protocadherin gamma subfamily A, 11 Gene [Source:MGI Symbol;Acc:MGI:1935228]
ENSMUST00000044851	5	15	27543	0.214913	Pcdhga11	protocadherin gamma subfamily A, 11 Gene [Source:MGI Symbol;Acc:MGI:1935228]
ENSMUST00000121420	5	15	27543	0.214913	Gm12176	predicted gene 12176 Pseudogene [Source:MGI Symbol;Acc:MGI:3651497]
ENSMUST00000106033	4	10	27543	0.214913	Rnh1	ribonuclease/angiogenin inhibitor 1 Gene [Source:MGI Symbol;Acc:MGI:1195456]
ENSMUST00000105443	5	15	27543	0.214913	Ccar1	cell division cycle and apoptosis regulator 1 Gene [Source:MGI Symbol;Acc:MGI:1914750]
ENSMUST00000058639	4	10	27543	0.214913	Gm71	predicted gene 71 Gene [Source:MGI Symbol;Acc:MGI:2684917]
ENSMUST00000120018	2	2	27543	0.214913	Gm13518	predicted gene 13518 Pseudogene [Source:MGI Symbol;Acc:MGI:3649619]
ENSMUST00000121357	5	15	27543	0.214913	Gramd1b	GRAM domain containing 1B Gene [Source:MGI Symbol;Acc:MGI:1925037]
ENSMUST00000005220	5	15	27543	0.214913	Slc1a2	solute carrier family 1 (glial high affinity glutamate transporter), member 2 Gene [Source:MGI Symbol;Acc:MGI:101931]
ENSMUST00000110059	2	2	27543	0.214913	NA	NA
ENSMUST00000087167	4	10	27543	0.214913	H2-M9	histocompatibility 2, M region locus 9 Gene [Source:MGI Symbol;Acc:MGI:1276570]
ENSMUST00000109734	4	10	27543	0.214913	Prdx2	peroxiredoxin 2 Gene [Source:MGI Symbol;Acc:MGI:109486]
ENSMUST00000077702	2	2	27543	0.214913	NA	NA
ENSMUST00000114177	5	15	27543	0.214913	App	amyloid beta (A4) precursor protein Gene [Source:MGI Symbol;Acc:MGI:88059]
ENSMUST00000068137	4	10	27543	0.214913	Bcas1	breast carcinoma amplified sequence 1 Gene [Source:MGI Symbol;Acc:MGI:1924210]
ENSMUST00000107757	4	10	27543	0.214913	Coro2a	coronin, actin binding protein 2A Gene [Source:MGI Symbol;Acc:MGI:1345966]
ENSMUST00000004225	5	15	27543	0.214913	Zfp87	zinc finger protein 87 Gene [Source:MGI Symbol;Acc:MGI:107768]
ENSMUST00000121446	4	10	27543	0.214913	Ipmk	inositol polyphosphate multikinase Gene [Source:MGI Symbol;Acc:MGI:1916968]
ENSMUST00000044721	5	15	27543	0.214913	Atp6v0a1	ATPase, H+ transporting, lysosomal V0 subunit A1 Gene [Source:MGI Symbol;Acc:MGI:103286]
ENSMUST00000022189	4	10	27543	0.214913	Aggf1	angiogenic factor with G patch and FHA domains 1 Gene [Source:MGI Symbol;Acc:MGI:1913799]
ENSMUST00000034285	4	10	27543	0.214913	Cotl1	coactosin-like 1 (Dictyostelium) Gene [Source:MGI Symbol;Acc:MGI:1919292]
ENSMUST00000118983	2	2	27543	0.214913	Gm11447	predicted gene 11447 Pseudogene [Source:MGI Symbol;Acc:MGI:3651506]
ENSMUST00000058137	4	10	27543	0.214913	B230208H17Rik	RIKEN cDNA B230208H17 gene Gene [Source:MGI Symbol;Acc:MGI:2442633]
ENSMUST00000107184	2	2	27543	0.214913	Sh3gl2	SH3-domain GRB2-like 2 Gene [Source:MGI Symbol;Acc:MGI:700009]
ENSMUST00000088464	5	15	27543	0.214913	Traf7	TNF receptor-associated factor 7 Gene [Source:MGI Symbol;Acc:MGI:3042141]
ENSMUST00000049792	5	15	27543	0.214913	Kcnq2	potassium voltage-gated channel, subfamily Q, member 2 Gene [Source:MGI Symbol;Acc:MGI:1309503]
ENSMUST00000102529	5	15	27543	0.214913	Sema3b	sema domain, immunoglobulin domain (Ig), short basic domain, secreted, (semaphorin) 3B Gene [Source:MGI Symbol;Acc:MGI:107561]
ENSMUST00000115724	5	15	27543	0.214913	Pde10a	phosphodiesterase 10A Gene [Source:MGI Symbol;Acc:MGI:1345143]
ENSMUST00000031411	5	15	27543	0.214913	Aldh2	aldehyde dehydrogenase 2, mitochondrial Gene [Source:MGI Symbol;Acc:MGI:99600]
ENSMUST00000099807	4	10	27543	0.214913	Prdx5	peroxiredoxin 5 Gene [Source:MGI Symbol;Acc:MGI:1859821]
ENSMUST00000120413	4	10	27543	0.214913	Gm11605	predicted gene 11605 Pseudogene [Source:MGI Symbol;Acc:MGI:3651339]
ENSMUST00000036719	5	15	27543	0.214913	Prex1	phosphatidylinositol-3,4,5-trisphosphate-dependent Rac exchange factor 1 Gene [Source:MGI Symbol;Acc:MGI:3040696]
ENSMUST00000093166	4	10	27543	0.214913	Cyfip2	cytoplasmic FMR1 interacting protein 2 Gene [Source:MGI Symbol;Acc:MGI:1924134]
ENSMUST00000114681	5	15	27543	0.214913	NA	NA
ENSMUST00000025864	4	10	27543	0.214913	Rnaseh2c	ribonuclease H2, subunit C Gene [Source:MGI Symbol;Acc:MGI:1915459]
ENSMUST00000097888	4	10	27543	0.214913	Eif2c1	eukaryotic translation initiation factor 2C, 1 Gene [Source:MGI Symbol;Acc:MGI:2446630]
ENSMUST00000032508	4	10	27543	0.214913	Fkbp4	FK506 binding protein 4 Gene [Source:MGI Symbol;Acc:MGI:95543]
ENSMUST00000066991	4	10	27543	0.214913	Adm2	adrenomedullin 2 Gene [Source:MGI Symbol;Acc:MGI:2675256]
ENSMUST00000069749	4	10	27543	0.214913	Rab27b	RAB27b, member RAS oncogene family Gene [Source:MGI Symbol;Acc:MGI:1931295]
ENSMUST00000002043	2	2	27543	0.214913	Ccdc47	coiled-coil domain containing 47 Gene [Source:MGI Symbol;Acc:MGI:1914413]
ENSMUST00000101533	2	2	27543	0.214913	NA	NA
ENSMUST00000091704	5	15	27543	0.214913	Hist1h2be	histone cluster 1, H2be Gene [Source:MGI Symbol;Acc:MGI:2448380]
ENSMUST00000115233	4	10	27543	0.214913	Ppp1r2	protein phosphatase 1, regulatory (inhibitor) subunit 2 Gene [Source:MGI Symbol;Acc:MGI:1914099]
ENSMUST00000095457	4	10	27543	0.214913	Ptbp1	polypyrimidine tract binding protein 1 Gene [Source:MGI Symbol;Acc:MGI:97791]
ENSMUST00000077282	5	15	27543	0.214913	Atrnl1	attractin like 1 Gene [Source:MGI Symbol;Acc:MGI:2147749]
ENSMUST00000106216	4	10	27543	0.214913	Actb	actin, beta Gene [Source:MGI Symbol;Acc:MGI:87904]
ENSMUST00000032597	7	27	27543	0.214913	Rpl28	ribosomal protein L28 Gene [Source:MGI Symbol;Acc:MGI:101839]
ENSMUST00000052499	4	10	27543	0.214913	Rps19bp1	ribosomal protein S19 binding protein 1 Gene [Source:MGI Symbol;Acc:MGI:1913788]
ENSMUST00000089895	4	10	27543	0.214913	NA	NA
ENSMUST00000112942	2	2	27543	0.214913	Mterfd2	MTERF domain containing 2 Gene [Source:MGI Symbol;Acc:MGI:1918355]
ENSMUST00000110455	4	10	27543	0.214913	Hist1h2bk	histone cluster 1, H2bk Gene [Source:MGI Symbol;Acc:MGI:2448399]
ENSMUST00000002145	4	10	27543	0.214913	Hsf2bp	heat shock transcription factor 2 binding protein Gene [Source:MGI Symbol;Acc:MGI:1921627]
ENSMUST00000114257	5	15	27543	0.214913	Col11a2	collagen, type XI, alpha 2 Gene [Source:MGI Symbol;Acc:MGI:88447]
ENSMUST00000101517	2	2	27543	0.214913	NA	NA
ENSMUST00000122431	2	2	27543	0.214913	Pnma2	paraneoplastic antigen MA2 Gene [Source:MGI Symbol;Acc:MGI:2444129]
ENSMUST00000080493	4	10	27543	0.214913	Gnas	GNAS (guanine nucleotide binding protein, alpha stimulating) complex locus Gene [Source:MGI Symbol;Acc:MGI:95777]
ENSMUST00000106234	5	15	27543	0.214913	NA	NA
ENSMUST00000115623	5	15	27543	0.214913	Wdr13	WD repeat domain 13 Gene [Source:MGI Symbol;Acc:MGI:1914661]
ENSMUST00000091089	5	15	27543	0.214913	Dnm1	dynamin 1 Gene [Source:MGI Symbol;Acc:MGI:107384]
ENSMUST00000119169	2	2	27543	0.214913	Gm14688	predicted gene 14688 Pseudogene [Source:MGI Symbol;Acc:MGI:3705448]
ENSMUST00000117849	4	10	27543	0.214913	Csnk1g1	casein kinase 1, gamma 1 Gene [Source:MGI Symbol;Acc:MGI:2660884]
ENSMUST00000045393	5	15	27543	0.214913	Lphn1	latrophilin 1 Gene [Source:MGI Symbol;Acc:MGI:1929461]
ENSMUST00000075372	5	15	27543	0.214913	Mbp	myelin basic protein Gene [Source:MGI Symbol;Acc:MGI:96925]
ENSMUST00000085651	4	10	27543	0.214913	Nptn	neuroplastin Gene [Source:MGI Symbol;Acc:MGI:108077]
ENSMUST00000120913	2	2	27543	0.214913	Gm11658	predicted gene 11658 Pseudogene [Source:MGI Symbol;Acc:MGI:3650797]
ENSMUST00000109468	4	10	27543	0.214913	Top1	topoisomerase (DNA) I Gene [Source:MGI Symbol;Acc:MGI:98788]
ENSMUST00000028170	5	15	27543	0.214913	Ralgds	ral guanine nucleotide dissociation stimulator Gene [Source:MGI Symbol;Acc:MGI:107485]
ENSMUST00000112096	4	10	27543	0.214913	Rnf10	ring finger protein 10 Gene [Source:MGI Symbol;Acc:MGI:1859162]
ENSMUST00000037547	4	10	27543	0.214913	Disp2	dispatched homolog 2 (Drosophila) Gene [Source:MGI Symbol;Acc:MGI:2388733]
ENSMUST00000101080	2	2	27543	0.214913	Serpina3f	serine (or cysteine) peptidase inhibitor, clade A, member 3F Gene [Source:MGI Symbol;Acc:MGI:2182838]
ENSMUST00000114252	5	15	27543	0.214913	Col11a2	collagen, type XI, alpha 2 Gene [Source:MGI Symbol;Acc:MGI:88447]
ENSMUST00000108610	4	10	27543	0.214913	Eif5a	eukaryotic translation initiation factor 5A Gene [Source:MGI Symbol;Acc:MGI:106248]
ENSMUST00000110149	5	15	27543	0.214913	BB287469	expressed sequence BB287469 Pseudogene [Source:MGI Symbol;Acc:MGI:3034635]
ENSMUST00000086854	4	10	27543	0.214913	Mapk10	mitogen-activated protein kinase 10 Gene [Source:MGI Symbol;Acc:MGI:1346863]
ENSMUST00000032811	5	15	27543	0.214913	Rasgrp4	RAS guanyl releasing protein 4 Gene [Source:MGI Symbol;Acc:MGI:2386851]
ENSMUST00000037623	4	10	27543	0.214913	Nrn1	neuritin 1 Gene [Source:MGI Symbol;Acc:MGI:1915654]
ENSMUST00000119837	5	15	27543	0.214913	Gm11539	predicted gene 11539 Pseudogene [Source:MGI Symbol;Acc:MGI:3651911]
ENSMUST00000072252	4	10	27543	0.214913	NA	NA
ENSMUST00000040910	4	10	27543	0.214913	NA	NA
ENSMUST00000113196	2	2	27543	0.214913	NA	NA
ENSMUST00000020673	5	15	27543	0.214913	Vdac1	voltage-dependent anion channel 1 Gene [Source:MGI Symbol;Acc:MGI:106919]
ENSMUST00000106785	2	2	27543	0.214913	Fxc1	fractured callus expressed transcript 1 Gene [Source:MGI Symbol;Acc:MGI:1315196]
ENSMUST00000111742	4	10	27543	0.214913	Bcat1	branched chain aminotransferase 1, cytosolic Gene [Source:MGI Symbol;Acc:MGI:104861]
ENSMUST00000101471	5	15	27543	0.214913	Dpp6	dipeptidylpeptidase 6 Gene [Source:MGI Symbol;Acc:MGI:94921]
ENSMUST00000110429	5	15	27543	0.214913	NA	NA
ENSMUST00000051100	4	10	27543	0.214913	Vamp7	vesicle-associated membrane protein 7 Gene [Source:MGI Symbol;Acc:MGI:1096399]
ENSMUST00000102887	4	10	27543	0.214913	Camk2a	calcium/calmodulin-dependent protein kinase II alpha Gene [Source:MGI Symbol;Acc:MGI:88256]
ENSMUST00000098713	4	10	27543	0.214913	BC030870	cDNA sequence BC030870 Gene [Source:MGI Symbol;Acc:MGI:3039572]
ENSMUST00000119551	7	27	27543	0.214913	Gm12070	predicted gene 12070 Pseudogene [Source:MGI Symbol;Acc:MGI:3650751]
ENSMUST00000034198	4	10	27543	0.214913	Gnao1	guanine nucleotide binding protein, alpha O Gene [Source:MGI Symbol;Acc:MGI:95775]
ENSMUST00000105370	4	10	27543	0.214913	Stk11	serine/threonine kinase 11 Gene [Source:MGI Symbol;Acc:MGI:1341870]
ENSMUST00000085435	4	10	27543	0.214913	Csnk1g2	casein kinase 1, gamma 2 Gene [Source:MGI Symbol;Acc:MGI:1920014]
ENSMUST00000079924	5	15	27543	0.214913	Btbd9	BTB (POZ) domain containing 9 Gene [Source:MGI Symbol;Acc:MGI:1916625]
ENSMUST00000100067	19	116	27543	0.214913	Scn2a1	sodium channel, voltage-gated, type II, alpha 1 Gene [Source:MGI Symbol;Acc:MGI:98248]
ENSMUST00000088648	4	10	27543	0.214913	Gm8759	predicted gene 8759 Gene [Source:MGI Symbol;Acc:MGI:3647726]
ENSMUST00000078267	4	10	27543	0.214913	Hist3h2ba	histone cluster 3, H2ba Gene [Source:MGI Symbol;Acc:MGI:1925553]
ENSMUST00000097040	4	10	27543	0.214913	Gm16382	predicted pseudogene 16382 Pseudogene [Source:MGI Symbol;Acc:MGI:3648194]
ENSMUST00000072133	4	10	27543	0.214913	Gm10226	predicted gene 10226 Gene [Source:MGI Symbol;Acc:MGI:3704470]
ENSMUST00000097805	4	10	27543	0.214913	Casp9	caspase 9 Gene [Source:MGI Symbol;Acc:MGI:1277950]
ENSMUST00000025338	4	10	27543	0.214913	Gabbr1	gamma-aminobutyric acid (GABA) B receptor, 1 Gene [Source:MGI Symbol;Acc:MGI:1860139]
ENSMUST00000085128	4	10	27543	0.214913	Rpl31-ps1	ribosomal protein L31, pseudogene 1 Pseudogene [Source:MGI Symbol;Acc:MGI:3644997]
ENSMUST00000069049	4	10	27543	0.214913	NA	NA
ENSMUST00000003501	4	10	27543	0.214913	Elavl3	ELAV (embryonic lethal, abnormal vision, Drosophila)-like 3 (Hu antigen C) Gene [Source:MGI Symbol;Acc:MGI:109157]
ENSMUST00000106408	2	2	27543	0.214913	NA	NA
ENSMUST00000119775	4	10	27543	0.214913	Gm6506	predicted gene 6506 Pseudogene [Source:MGI Symbol;Acc:MGI:3645107]
ENSMUST00000025951	4	10	27543	0.214913	Rbp4	retinol binding protein 4, plasma Gene [Source:MGI Symbol;Acc:MGI:97879]
ENSMUST00000111065	4	10	27543	0.214913	NA	NA
ENSMUST00000060805	5	15	27543	0.214913	Fam120a	family with sequence similarity 120, member A Gene [Source:MGI Symbol;Acc:MGI:2446163]
ENSMUST00000026973	5	15	27543	0.214913	Prkar1b	protein kinase, cAMP dependent regulatory, type I beta Gene [Source:MGI Symbol;Acc:MGI:97759]
ENSMUST00000019456	4	10	27543	0.214913	Grb7	growth factor receptor bound protein 7 Gene [Source:MGI Symbol;Acc:MGI:102683]
ENSMUST00000087113	2	2	27543	0.214913	NA	NA
ENSMUST00000110293	4	10	27543	0.214913	Serpinb6b	serine (or cysteine) peptidase inhibitor, clade B, member 6b Gene [Source:MGI Symbol;Acc:MGI:894688]
ENSMUST00000122380	2	2	27543	0.214913	Gm8061	predicted gene 8061 Pseudogene [Source:MGI Symbol;Acc:MGI:3646568]
ENSMUST00000039174	4	10	27543	0.214913	Prdm1	PR domain containing 1, with ZNF domain Gene [Source:MGI Symbol;Acc:MGI:99655]
ENSMUST00000098590	2	2	27543	0.214913	Ppp3ca	protein phosphatase 3, catalytic subunit, alpha isoform Gene [Source:MGI Symbol;Acc:MGI:107164]
ENSMUST00000111496	5	15	27543	0.214913	NA	NA
ENSMUST00000051524	2	2	27543	0.214913	NA	NA
ENSMUST00000038169	5	15	27543	0.214913	Mif	macrophage migration inhibitory factor Gene [Source:MGI Symbol;Acc:MGI:96982]
ENSMUST00000117356	4	10	27543	0.214913	Rpl38-ps2	ribosomal protein L38, pseudogene 2 Pseudogene [Source:MGI Symbol;Acc:MGI:3646625]
ENSMUST00000048252	4	10	27543	0.214913	Bcat1	branched chain aminotransferase 1, cytosolic Gene [Source:MGI Symbol;Acc:MGI:104861]
ENSMUST00000106806	4	10	27543	0.214913	Rsbn1	rosbin, round spermatid basic protein 1 Gene [Source:MGI Symbol;Acc:MGI:2444993]
ENSMUST00000061565	2	2	27543	0.214913	NA	NA
ENSMUST00000118675	2	2	27543	0.214913	Gm12684	predicted gene 12684 Pseudogene [Source:MGI Symbol;Acc:MGI:3650091]
ENSMUST00000030118	4	10	27543	0.214913	Dnaja1	DnaJ (Hsp40) homolog, subfamily A, member 1 Gene [Source:MGI Symbol;Acc:MGI:1270129]
ENSMUST00000092648	6	21	27543	0.216167	Ezh2	enhancer of zeste homolog 2 (Drosophila) Gene [Source:MGI Symbol;Acc:MGI:107940]
ENSMUST00000026352	6	21	27543	0.216167	Ptprj	protein tyrosine phosphatase, receptor type, J Gene [Source:MGI Symbol;Acc:MGI:104574]
ENSMUST00000115900	6	21	27543	0.216167	AC147261.2
ENSMUST00000053150	6	21	27543	0.216167	Gm9846	predicted gene 9846 Gene [Source:MGI Symbol;Acc:MGI:3704345]
ENSMUST00000109346	6	21	27543	0.216167	NA	NA
ENSMUST00000106443	6	21	27543	0.216167	Gm4609	predicted gene 4609 Pseudogene [Source:MGI Symbol;Acc:MGI:3782792]
ENSMUST00000029126	9	41	27543	0.238263	Itch	itchy, E3 ubiquitin protein ligase Gene [Source:MGI Symbol;Acc:MGI:1202301]
ENSMUST00000121722	7	28	27543	0.255312	Gm12366	predicted gene 12366 Pseudogene [Source:MGI Symbol;Acc:MGI:3649557]
ENSMUST00000119978	7	28	27543	0.255312	Gm12671	predicted gene 12671 Pseudogene [Source:MGI Symbol;Acc:MGI:3651684]
ENSMUST00000121831	7	28	27543	0.255312	Gm14760	predicted gene 14760 Pseudogene [Source:MGI Symbol;Acc:MGI:3709612]
ENSMUST00000088999	7	28	27543	0.255312	NA	NA
ENSMUST00000121658	7	28	27543	0.255312	Gm13394	predicted gene 13394 Pseudogene [Source:MGI Symbol;Acc:MGI:3651848]
ENSMUST00000110458	7	28	27543	0.255312	Gm10359	predicted gene 10359 Pseudogene [Source:MGI Symbol;Acc:MGI:3708724]
ENSMUST00000051437	5	16	27543	0.257455	Hspe1-rs1	heat shock protein 1 (chaperonin 10), related sequence 1 Gene [Source:MGI Symbol;Acc:MGI:1935159]
ENSMUST00000024805	5	16	27543	0.257455	Cpne5	copine V Gene [Source:MGI Symbol;Acc:MGI:2385908]
ENSMUST00000102969	5	16	27543	0.257455	Hist1h2ae	histone cluster 1, H2ae Gene [Source:MGI Symbol;Acc:MGI:2448290]
ENSMUST00000076295	5	16	27543	0.257455	Rpl28-ps3	ribosomal protein L28, pseudogene 3 Pseudogene [Source:MGI Symbol;Acc:MGI:3650282]
ENSMUST00000073495	5	16	27543	0.257455	Gm12960	predicted gene 12960 Pseudogene [Source:MGI Symbol;Acc:MGI:3651525]
ENSMUST00000073900	5	16	27543	0.257455	Hist3h2bb-ps	histone cluster 3, H2bb, pseudogene Pseudogene [Source:MGI Symbol;Acc:MGI:1922442]
ENSMUST00000030443	5	16	27543	0.257455	Ptch2	patched homolog 2 Gene [Source:MGI Symbol;Acc:MGI:1095405]
ENSMUST00000098289	5	16	27543	0.257455	Gm7682	predicted gene 7682 Gene [Source:MGI Symbol;Acc:MGI:3779756]
ENSMUST00000017384	5	16	27543	0.257455	Casc3	cancer susceptibility candidate 3 Gene [Source:MGI Symbol;Acc:MGI:2179723]
ENSMUST00000101021	5	16	27543	0.257455	Gm6351	predicted gene 6351 Gene [Source:MGI Symbol;Acc:MGI:3647817]
ENSMUST00000079338	5	16	27543	0.257455	NA	NA
ENSMUST00000079758	5	16	27543	0.257455	Aplp2	amyloid beta (A4) precursor-like protein 2 Gene [Source:MGI Symbol;Acc:MGI:88047]
ENSMUST00000068378	5	16	27543	0.257455	Cntn1	contactin 1 Gene [Source:MGI Symbol;Acc:MGI:105980]
ENSMUST00000078578	5	16	27543	0.257455	NA	NA
ENSMUST00000074991	5	16	27543	0.257455	Tmem184b	transmembrane protein 184b Gene [Source:MGI Symbol;Acc:MGI:2445179]
ENSMUST00000050774	5	16	27543	0.257455	Gm9816	predicted pseudogene 9816 Pseudogene [Source:MGI Symbol;Acc:MGI:3704465]
ENSMUST00000115610	5	16	27543	0.257455	Arvcf	armadillo repeat gene deleted in velo-cardio-facial syndrome Gene [Source:MGI Symbol;Acc:MGI:109620]
ENSMUST00000026436	5	16	27543	0.257455	Baiap2	brain-specific angiogenesis inhibitor 1-associated protein 2 Gene [Source:MGI Symbol;Acc:MGI:2137336]
ENSMUST00000080661	5	16	27543	0.257455	NA	NA
ENSMUST00000068408	5	16	27543	0.257455	Rps15	ribosomal protein S15 Gene [Source:MGI Symbol;Acc:MGI:98117]
ENSMUST00000043765	5	16	27543	0.257455	Hnrnpul1	heterogeneous nuclear ribonucleoprotein U-like 1 Gene [Source:MGI Symbol;Acc:MGI:2443517]
ENSMUST00000119927	5	16	27543	0.257455	Gm12331	predicted gene 12331 Pseudogene [Source:MGI Symbol;Acc:MGI:3650004]
ENSMUST00000090776	5	16	27543	0.257455	Hist1h2ad	histone cluster 1, H2ad Gene [Source:MGI Symbol;Acc:MGI:2448289]
ENSMUST00000101030	5	16	27543	0.257455	Gm7292	predicted gene 7292 Gene [Source:MGI Symbol;Acc:MGI:3645786]
ENSMUST00000079601	5	16	27543	0.257455	Etv5	ets variant gene 5 Gene [Source:MGI Symbol;Acc:MGI:1096867]
ENSMUST00000119503	5	16	27543	0.257455	Hmgb1-ps6	high mobility group box 1, pseudogene 6 Pseudogene [Source:MGI Symbol;Acc:MGI:3776507]
ENSMUST00000110476	5	16	27543	0.257455	Hist1h2bm	histone cluster 1, H2bm Gene [Source:MGI Symbol;Acc:MGI:2448404]
ENSMUST00000045281	5	16	27543	0.257455	Smg6	Smg-6 homolog, nonsense mediated mRNA decay factor (C. elegans) Gene [Source:MGI Symbol;Acc:MGI:2144117]
ENSMUST00000114960	5	16	27543	0.257455	Kalrn	kalirin, RhoGEF kinase Gene [Source:MGI Symbol;Acc:MGI:2685385]
ENSMUST00000002403	5	16	27543	0.257455	Dhrs1	dehydrogenase/reductase (SDR family) member 1 Gene [Source:MGI Symbol;Acc:MGI:1196314]
ENSMUST00000117417	5	16	27543	0.257455	Gm13141	predicted gene 13141 Pseudogene [Source:MGI Symbol;Acc:MGI:3651744]
ENSMUST00000025511	5	16	27543	0.257455	Rps14	ribosomal protein S14 Gene [Source:MGI Symbol;Acc:MGI:98107]
ENSMUST00000012314	5	16	27543	0.257455	A530054K11Rik	RIKEN cDNA A530054K11 gene Gene [Source:MGI Symbol;Acc:MGI:3036250]
ENSMUST00000110161	5	16	27543	0.257455	Phactr1	phosphatase and actin regulator 1 Gene [Source:MGI Symbol;Acc:MGI:2659021]
ENSMUST00000102972	5	16	27543	0.257455	Hist1h4h	histone cluster 1, H4h Gene [Source:MGI Symbol;Acc:MGI:2448427]
ENSMUST00000109839	5	16	27543	0.257455	Ntrk2	neurotrophic tyrosine kinase, receptor, type 2 Gene [Source:MGI Symbol;Acc:MGI:97384]
ENSMUST00000041401	5	16	27543	0.257455	Herc3	hect domain and RLD 3 Gene [Source:MGI Symbol;Acc:MGI:1921248]
ENSMUST00000121049	5	16	27543	0.257455	Bai2	brain-specific angiogenesis inhibitor 2 Gene [Source:MGI Symbol;Acc:MGI:2451244]
ENSMUST00000100497	5	16	27543	0.257455	Actb	actin, beta Gene [Source:MGI Symbol;Acc:MGI:87904]
ENSMUST00000101011	5	16	27543	0.257455	Gm7982	predicted gene 7982 Gene [Source:MGI Symbol;Acc:MGI:3648891]
ENSMUST00000121839	3	6	27543	0.259855	Kndc1	kinase non-catalytic C-lobe domain (KIND) containing 1 Gene [Source:MGI Symbol;Acc:MGI:1923734]
ENSMUST00000017610	3	6	27543	0.259855	Timp2	tissue inhibitor of metalloproteinase 2 Gene [Source:MGI Symbol;Acc:MGI:98753]
ENSMUST00000046174	3	6	27543	0.259855	Cldn11	claudin 11 Gene [Source:MGI Symbol;Acc:MGI:106925]
ENSMUST00000091749	6	22	27543	0.259855	Gm13646	predicted gene 13646 Gene [Source:MGI Symbol;Acc:MGI:3702051]
ENSMUST00000080175	3	6	27543	0.259855	4933426I21Rik	RIKEN cDNA 4933426I21 gene Gene [Source:MGI Symbol;Acc:MGI:1918413]
ENSMUST00000121537	3	6	27543	0.259855	Gm7931	predicted pseudogene 7931 Pseudogene [Source:MGI Symbol;Acc:MGI:3643448]
ENSMUST00000074828	6	22	27543	0.259855	Rpl21-ps6	ribosomal protein L21, pseudogene 6 Pseudogene [Source:MGI Symbol;Acc:MGI:3643554]
ENSMUST00000118283	3	6	27543	0.259855	Tgif1	TGFB-induced factor homeobox 1 Gene [Source:MGI Symbol;Acc:MGI:1194497]
ENSMUST00000099301	3	6	27543	0.259855	Flrt3	fibronectin leucine rich transmembrane protein 3 Gene [Source:MGI Symbol;Acc:MGI:1918686]
ENSMUST00000059097	3	6	27543	0.259855	Shisa5	shisa homolog 5 (Xenopus laevis) Gene [Source:MGI Symbol;Acc:MGI:1915044]
ENSMUST00000113719	6	22	27543	0.259855	Spna2	spectrin alpha 2 Gene [Source:MGI Symbol;Acc:MGI:98386]
ENSMUST00000047315	3	6	27543	0.259855	Foxa2	forkhead box A2 Gene [Source:MGI Symbol;Acc:MGI:1347476]
ENSMUST00000066074	3	6	27543	0.259855	NA	NA
ENSMUST00000067902	3	6	27543	0.259855	Pigv	phosphatidylinositol glycan anchor biosynthesis, class V Gene [Source:MGI Symbol;Acc:MGI:2442480]
ENSMUST00000058706	3	6	27543	0.259855	Gm7816	predicted pseudogene 7816 Pseudogene [Source:MGI Symbol;Acc:MGI:3646286]
ENSMUST00000091744	6	22	27543	0.259855	Gm11277	predicted gene 11277 Gene [Source:MGI Symbol;Acc:MGI:3710645]
ENSMUST00000121985	3	6	27543	0.259855	Gm14162	predicted gene 14162 Pseudogene [Source:MGI Symbol;Acc:MGI:3649237]
ENSMUST00000087114	3	6	27543	0.259855	Cenpq	centromere protein Q Gene [Source:MGI Symbol;Acc:MGI:1933744]
ENSMUST00000048319	3	6	27543	0.259855	Zfyve1	zinc finger, FYVE domain containing 1 Gene [Source:MGI Symbol;Acc:MGI:3026685]
ENSMUST00000066791	3	6	27543	0.259855	Tmem179	transmembrane protein 179 Gene [Source:MGI Symbol;Acc:MGI:2144891]
ENSMUST00000114749	3	6	27543	0.259855	NA	NA
ENSMUST00000115790	3	6	27543	0.259855	Synj2	synaptojanin 2 Gene [Source:MGI Symbol;Acc:MGI:1201671]
ENSMUST00000021496	3	6	27543	0.259855	Serpina3a	serine (or cysteine) peptidase inhibitor, clade A, member 3A Gene [Source:MGI Symbol;Acc:MGI:1921319]
ENSMUST00000055125	3	6	27543	0.259855	Diras1	DIRAS family, GTP-binding RAS-like 1 Gene [Source:MGI Symbol;Acc:MGI:2183442]
ENSMUST00000121890	3	6	27543	0.259855	Gm12035	predicted gene 12035 Pseudogene [Source:MGI Symbol;Acc:MGI:3651599]
ENSMUST00000106543	3	6	27543	0.259855	Otop3	otopetrin 3 Gene [Source:MGI Symbol;Acc:MGI:1916852]
ENSMUST00000111129	3	6	27543	0.259855	Polr2j	polymerase (RNA) II (DNA directed) polypeptide J Gene [Source:MGI Symbol;Acc:MGI:109582]
ENSMUST00000029149	9	42	27543	0.259855	Rbm39	RNA binding motif protein 39 Gene [Source:MGI Symbol;Acc:MGI:2157953]
ENSMUST00000082092	6	22	27543	0.259855	Rpl38	ribosomal protein L38 Gene [Source:MGI Symbol;Acc:MGI:1914921]
ENSMUST00000115191	3	6	27543	0.259855	Rhox2b	reproductive homeobox 2B Gene [Source:MGI Symbol;Acc:MGI:3770262]
ENSMUST00000085140	3	6	27543	0.259855	NA	NA
ENSMUST00000107923	3	6	27543	0.259855	Dynll2	dynein light chain LC8-type 2 Gene [Source:MGI Symbol;Acc:MGI:1915347]
ENSMUST00000112811	3	6	27543	0.259855	Klhl8	kelch-like 8 (Drosophila) Gene [Source:MGI Symbol;Acc:MGI:2179430]
ENSMUST00000047951	3	6	27543	0.259855	Fbxo2	F-box protein 2 Gene [Source:MGI Symbol;Acc:MGI:2446216]
ENSMUST00000091257	3	6	27543	0.259855	Mfn1	mitofusin 1 Gene [Source:MGI Symbol;Acc:MGI:1914664]
ENSMUST00000062642	3	6	27543	0.259855	Gm9785	predicted pseudogene 9785 Pseudogene [Source:MGI Symbol;Acc:MGI:3641899]
ENSMUST00000053252	3	6	27543	0.259855	Ctxn1	cortexin 1 Gene [Source:MGI Symbol;Acc:MGI:88566]
ENSMUST00000021535	3	6	27543	0.259855	Papola	poly (A) polymerase alpha Gene [Source:MGI Symbol;Acc:MGI:109301]
ENSMUST00000105093	3	6	27543	0.259855	Gm3150	predicted gene 3150 Gene [Source:MGI Symbol;Acc:MGI:3781329]
ENSMUST00000111021	3	6	27543	0.259855	NA	NA
ENSMUST00000116034	3	6	27543	0.259855	Gm13004	predicted gene 13004 Pseudogene [Source:MGI Symbol;Acc:MGI:3650100]
ENSMUST00000061617	3	6	27543	0.259855	Zfp280b	zinc finger protein 280B Gene [Source:MGI Symbol;Acc:MGI:1927865]
ENSMUST00000100336	3	6	27543	0.259855	NA	NA
ENSMUST00000108406	4	11	27543	0.262508	NA	NA
ENSMUST00000120162	4	11	27543	0.262508	Gm13875	predicted gene 13875 Pseudogene [Source:MGI Symbol;Acc:MGI:3649350]
ENSMUST00000072581	4	11	27543	0.262508	Gps2	G protein pathway suppressor 2 Gene [Source:MGI Symbol;Acc:MGI:1891751]
ENSMUST00000121098	4	11	27543	0.262508	Gm12642	predicted gene 12642 Pseudogene [Source:MGI Symbol;Acc:MGI:3649275]
ENSMUST00000121977	4	11	27543	0.262508	Rps2-ps4	ribosomal protein S2, pseudogene 4 Pseudogene [Source:MGI Symbol;Acc:MGI:3651115]
ENSMUST00000109442	4	11	27543	0.262508	Ptprt	protein tyrosine phosphatase, receptor type, T Gene [Source:MGI Symbol;Acc:MGI:1321152]
ENSMUST00000101069	4	11	27543	0.262508	Ncor1	nuclear receptor co-repressor 1 Gene [Source:MGI Symbol;Acc:MGI:1349717]
ENSMUST00000086199	4	11	27543	0.262508	Glul	glutamate-ammonia ligase (glutamine synthetase) Gene [Source:MGI Symbol;Acc:MGI:95739]
ENSMUST00000113597	4	11	27543	0.262508	Rab7	RAB7, member RAS oncogene family Gene [Source:MGI Symbol;Acc:MGI:105068]
ENSMUST00000073292	4	11	27543	0.262508	Srrm2	serine/arginine repetitive matrix 2 Gene [Source:MGI Symbol;Acc:MGI:1923206]
ENSMUST00000007042	4	11	27543	0.262508	Ik	IK cytokine Gene [Source:MGI Symbol;Acc:MGI:1345142]
ENSMUST00000003860	4	11	27543	0.262508	Adck4	aarF domain containing kinase 4 Gene [Source:MGI Symbol;Acc:MGI:1924139]
ENSMUST00000115731	4	11	27543	0.262508	Mapk1	mitogen-activated protein kinase 1 Gene [Source:MGI Symbol;Acc:MGI:1346858]
ENSMUST00000027991	4	11	27543	0.262508	Rgs4	regulator of G-protein signaling 4 Gene [Source:MGI Symbol;Acc:MGI:108409]
ENSMUST00000037918	4	11	27543	0.262508	Tmem33	transmembrane protein 33 Gene [Source:MGI Symbol;Acc:MGI:1915128]
ENSMUST00000107206	4	11	27543	0.262508	Crebzf	CREB/ATF bZIP transcription factor Gene [Source:MGI Symbol;Acc:MGI:2675296]
ENSMUST00000100676	4	11	27543	0.262508	Bmp4	bone morphogenetic protein 4 Gene [Source:MGI Symbol;Acc:MGI:88180]
ENSMUST00000107932	4	11	27543	0.262508	Bzrap1	benzodiazapine receptor associated protein 1 Gene [Source:MGI Symbol;Acc:MGI:2450877]
ENSMUST00000111213	4	11	27543	0.262508	Slc1a2	solute carrier family 1 (glial high affinity glutamate transporter), member 2 Gene [Source:MGI Symbol;Acc:MGI:101931]
ENSMUST00000069579	4	11	27543	0.262508	Tceb2	transcription elongation factor B (SIII), polypeptide 2 Gene [Source:MGI Symbol;Acc:MGI:1914923]
ENSMUST00000073447	4	11	27543	0.262508	Pcdhga11	protocadherin gamma subfamily A, 11 Gene [Source:MGI Symbol;Acc:MGI:1935228]
ENSMUST00000084124	4	11	27543	0.262508	Pgd	phosphogluconate dehydrogenase Gene [Source:MGI Symbol;Acc:MGI:97553]
ENSMUST00000105423	4	11	27543	0.262508	Pcdh15	protocadherin 15 Gene [Source:MGI Symbol;Acc:MGI:1891428]
ENSMUST00000118577	4	11	27543	0.262508	Gm16418	predicted pseudogene 16418 Pseudogene [Source:MGI Symbol;Acc:MGI:3644548]
ENSMUST00000116238	4	11	27543	0.262508	Hk1	hexokinase 1 Gene [Source:MGI Symbol;Acc:MGI:96103]
ENSMUST00000031564	4	11	27543	0.262508	Actb	actin, beta Gene [Source:MGI Symbol;Acc:MGI:87904]
ENSMUST00000074846	4	11	27543	0.262508	Hsph1	heat shock 105kDa/110kDa protein 1 Gene [Source:MGI Symbol;Acc:MGI:105053]
ENSMUST00000096426	4	11	27543	0.262508	C230004F18Rik	RIKEN cDNA C230004F18 gene Gene [Source:MGI Symbol;Acc:MGI:3041217]
ENSMUST00000101212	4	11	27543	0.262508	Nup62cl	nucleoporin 62 C-terminal like Gene [Source:MGI Symbol;Acc:MGI:2685565]
ENSMUST00000038839	4	11	27543	0.262508	Krt35	keratin 35 Gene [Source:MGI Symbol;Acc:MGI:1858899]
ENSMUST00000097827	4	11	27543	0.262508	Gm16287	predicted gene 16287 Gene [Source:MGI Symbol;Acc:MGI:3650322]
ENSMUST00000101172	4	11	27543	0.262508	NA	NA
ENSMUST00000110890	4	11	27543	0.262508	Prkar1b	protein kinase, cAMP dependent regulatory, type I beta Gene [Source:MGI Symbol;Acc:MGI:97759]
ENSMUST00000111186	4	11	27543	0.262508	Dnmt3a	DNA methyltransferase 3A Gene [Source:MGI Symbol;Acc:MGI:1261827]
ENSMUST00000103127	4	11	27543	0.262508	Krt35	keratin 35 Gene [Source:MGI Symbol;Acc:MGI:1858899]
ENSMUST00000102711	4	11	27543	0.262508	Gemin5	gem (nuclear organelle) associated protein 5 Gene [Source:MGI Symbol;Acc:MGI:2449311]
ENSMUST00000044767	4	11	27543	0.262508	Neurod6	neurogenic differentiation 6 Gene [Source:MGI Symbol;Acc:MGI:106593]
ENSMUST00000085133	4	11	27543	0.262508	Atp2c1	ATPase, Ca++-sequestering Gene [Source:MGI Symbol;Acc:MGI:1889008]
ENSMUST00000121403	4	11	27543	0.262508	Gm11954	predicted gene 11954 Pseudogene [Source:MGI Symbol;Acc:MGI:3649565]
ENSMUST00000031061	4	11	27543	0.262508	Dhx15	DEAH (Asp-Glu-Ala-His) box polypeptide 15 Gene [Source:MGI Symbol;Acc:MGI:1099786]
ENSMUST00000023217	4	11	27543	0.262508	Bop1	block of proliferation 1 Gene [Source:MGI Symbol;Acc:MGI:1334460]
ENSMUST00000062827	4	11	27543	0.262508	1520401A03Rik	RIKEN cDNA 1520401A03 gene Gene [Source:MGI Symbol;Acc:MGI:2443785]
ENSMUST00000080022	4	11	27543	0.262508	NA	NA
ENSMUST00000101202	4	11	27543	0.262508	Ylpm1	YLP motif containing 1 Gene [Source:MGI Symbol;Acc:MGI:1926195]
ENSMUST00000110748	4	11	27543	0.262508	Nrcam	neuron-glia-CAM-related cell adhesion molecule Gene [Source:MGI Symbol;Acc:MGI:104750]
ENSMUST00000109574	4	11	27543	0.262508	Epb4.1l1	erythrocyte protein band 4.1-like 1 Gene [Source:MGI Symbol;Acc:MGI:103010]
ENSMUST00000107480	4	11	27543	0.262508	NA	NA
ENSMUST00000087556	4	11	27543	0.262508	Smc5	structural maintenance of chromosomes 5 Gene [Source:MGI Symbol;Acc:MGI:2385088]
ENSMUST00000008802	4	11	27543	0.262508	Rbfox1	RNA binding protein, fox-1 homolog (C. elegans) 1 Gene [Source:MGI Symbol;Acc:MGI:1926224]
ENSMUST00000003207	4	11	27543	0.262508	Lipe	lipase, hormone sensitive Gene [Source:MGI Symbol;Acc:MGI:96790]
ENSMUST00000017184	4	11	27543	0.262508	Serpinb6b	serine (or cysteine) peptidase inhibitor, clade B, member 6b Gene [Source:MGI Symbol;Acc:MGI:894688]
ENSMUST00000092844	4	11	27543	0.262508	Rad51l3	RAD51-like 3 (S. cerevisiae) Gene [Source:MGI Symbol;Acc:MGI:1261809]
ENSMUST00000003135	4	11	27543	0.262508	Elf3	E74-like factor 3 Gene [Source:MGI Symbol;Acc:MGI:1101781]
ENSMUST00000110445	4	11	27543	0.262508	Vmn1r206	vomeronasal 1 receptor 206 Gene [Source:MGI Symbol;Acc:MGI:2159665]
ENSMUST00000105752	4	11	27543	0.262508	Pramel5	preferentially expressed antigen in melanoma like 5 Gene [Source:MGI Symbol;Acc:MGI:2156389]
ENSMUST00000082070	4	11	27543	0.262508	Rit2	Ras-like without CAAX 2 Gene [Source:MGI Symbol;Acc:MGI:108054]
ENSMUST00000019268	4	11	27543	0.262508	Scrn1	secernin 1 Gene [Source:MGI Symbol;Acc:MGI:1917188]
ENSMUST00000098362	4	11	27543	0.262508	Mbtps1	membrane-bound transcription factor peptidase, site 1 Gene [Source:MGI Symbol;Acc:MGI:1927235]
ENSMUST00000023759	4	11	27543	0.262508	Smarcd1	SWI/SNF related, matrix associated, actin dependent regulator of chromatin, subfamily d, member 1 Gene [Source:MGI Symbol;Acc:MGI:1933623]
ENSMUST00000109440	4	11	27543	0.262508	Ccdc79	coiled-coil domain containing 79 Gene [Source:MGI Symbol;Acc:MGI:2443187]
ENSMUST00000089597	4	11	27543	0.262508	Zfml	zinc finger, matrin-like Gene [Source:MGI Symbol;Acc:MGI:1203484]
ENSMUST00000000199	4	11	27543	0.262508	Ncs1	neuronal calcium sensor 1 Gene [Source:MGI Symbol;Acc:MGI:109166]
ENSMUST00000003502	4	11	27543	0.262508	Rab3b	RAB3B, member RAS oncogene family Gene [Source:MGI Symbol;Acc:MGI:1917158]
ENSMUST00000072727	4	11	27543	0.262508	Nap1l4	nucleosome assembly protein 1-like 4 Gene [Source:MGI Symbol;Acc:MGI:1316687]
ENSMUST00000116585	4	11	27543	0.262508	NA	NA
ENSMUST00000115411	4	11	27543	0.262508	Pdpk1	3-phosphoinositide dependent protein kinase 1 Gene [Source:MGI Symbol;Acc:MGI:1338068]
ENSMUST00000117449	4	11	27543	0.262508	Jkamp	JNK1/MAPK8-associated membrane protein Gene [Source:MGI Symbol;Acc:MGI:1915057]
ENSMUST00000023132	4	11	27543	0.262508	Pde1b	phosphodiesterase 1B, Ca2+-calmodulin dependent Gene [Source:MGI Symbol;Acc:MGI:97523]
ENSMUST00000006562	4	11	27543	0.262508	Hyi	hydroxypyruvate isomerase homolog (E. coli) Gene [Source:MGI Symbol;Acc:MGI:1915430]
ENSMUST00000038618	4	11	27543	0.262508	Ltbp4	latent transforming growth factor beta binding protein 4 Gene [Source:MGI Symbol;Acc:MGI:1321395]
ENSMUST00000111357	4	11	27543	0.262508	Rgs4	regulator of G-protein signaling 4 Gene [Source:MGI Symbol;Acc:MGI:108409]
ENSMUST00000034240	4	11	27543	0.262508	Kifc3	kinesin family member C3 Gene [Source:MGI Symbol;Acc:MGI:109202]
ENSMUST00000092951	4	11	27543	0.262508	NA	NA
ENSMUST00000032214	4	11	27543	0.262508	Mlf2	myeloid leukemia factor 2 Gene [Source:MGI Symbol;Acc:MGI:1353554]
ENSMUST00000119339	4	11	27543	0.262508	Ythdc1	YTH domain containing 1 Gene [Source:MGI Symbol;Acc:MGI:2443713]
ENSMUST00000025904	4	11	27543	0.262508	Prdx5	peroxiredoxin 5 Gene [Source:MGI Symbol;Acc:MGI:1859821]
ENSMUST00000109607	4	11	27543	0.262508	Cpne1	copine I Gene [Source:MGI Symbol;Acc:MGI:2386621]
ENSMUST00000030768	4	11	27543	0.262508	Kcnab2	potassium voltage-gated channel, shaker-related subfamily, beta member 2 Gene [Source:MGI Symbol;Acc:MGI:109239]
ENSMUST00000122269	4	11	27543	0.262508	Gm14473	predicted gene 14473 Pseudogene [Source:MGI Symbol;Acc:MGI:3650130]
ENSMUST00000061226	4	11	27543	0.262508	Gm8508	predicted gene 8508 Pseudogene [Source:MGI Symbol;Acc:MGI:3643536]
ENSMUST00000064090	4	11	27543	0.262508	NA	NA
ENSMUST00000051720	4	11	27543	0.262508	Sh3tc2	SH3 domain and tetratricopeptide repeats 2 Gene [Source:MGI Symbol;Acc:MGI:2444417]
ENSMUST00000022192	4	11	27543	0.262508	Pde8b	phosphodiesterase 8B Gene [Source:MGI Symbol;Acc:MGI:2443999]
ENSMUST00000060992	4	11	27543	0.262508	Rtn4	reticulon 4 Gene [Source:MGI Symbol;Acc:MGI:1915835]
ENSMUST00000028151	4	11	27543	0.262508	Dpm2	dolichol-phosphate (beta-D) mannosyltransferase 2 Gene [Source:MGI Symbol;Acc:MGI:1330238]
ENSMUST00000114934	4	11	27543	0.262508	Celf2	CUGBP, Elav-like family member 2 Gene [Source:MGI Symbol;Acc:MGI:1338822]
ENSMUST00000079866	4	11	27543	0.262508	Srsf1	serine/arginine-rich splicing factor 1 Gene [Source:MGI Symbol;Acc:MGI:98283]
ENSMUST00000118308	4	11	27543	0.262508	Gm13879	predicted gene 13879 Pseudogene [Source:MGI Symbol;Acc:MGI:3649538]
ENSMUST00000037640	4	11	27543	0.262508	Rapgefl1	Rap guanine nucleotide exchange factor (GEF)-like 1 Gene [Source:MGI Symbol;Acc:MGI:3611446]
ENSMUST00000105369	4	11	27543	0.262508	Dos	downstream of Stk11 Gene [Source:MGI Symbol;Acc:MGI:1354170]
ENSMUST00000026985	4	11	27543	0.262508	Cplx2	complexin 2 Gene [Source:MGI Symbol;Acc:MGI:104726]
ENSMUST00000030747	4	11	27543	0.262508	Casp9	caspase 9 Gene [Source:MGI Symbol;Acc:MGI:1277950]
ENSMUST00000119847	4	11	27543	0.262508	Dcps	decapping enzyme, scavenger Gene [Source:MGI Symbol;Acc:MGI:1916555]
ENSMUST00000045704	4	11	27543	0.262508	NA	NA
ENSMUST00000081591	4	11	27543	0.262508	Zc3h15	zinc finger CCCH-type containing 15 Gene [Source:MGI Symbol;Acc:MGI:1919747]
ENSMUST00000040430	4	11	27543	0.262508	Vat1	vesicle amine transport protein 1 homolog (T californica) Gene [Source:MGI Symbol;Acc:MGI:1349450]
ENSMUST00000114978	4	11	27543	0.262508	Tcf4	transcription factor 4 Gene [Source:MGI Symbol;Acc:MGI:98506]
ENSMUST00000118875	7	29	27543	0.263188	Gapdh	glyceraldehyde-3-phosphate dehydrogenase Gene [Source:MGI Symbol;Acc:MGI:95640]
ENSMUST00000109595	6	23	27543	0.287586	Gm3272	predicted pseudogene 3272 Pseudogene [Source:MGI Symbol;Acc:MGI:3781450]
ENSMUST00000113842	6	23	27543	0.287586	Gm5138	predicted gene 5138 Pseudogene [Source:MGI Symbol;Acc:MGI:3779464]
ENSMUST00000050350	6	23	27543	0.287586	Glcci1	glucocorticoid induced transcript 1 Gene [Source:MGI Symbol;Acc:MGI:2179717]
ENSMUST00000110467	6	23	27543	0.287586	Gm11277	predicted gene 11277 Gene [Source:MGI Symbol;Acc:MGI:3710645]
ENSMUST00000051091	6	23	27543	0.287586	Hist1h2be	histone cluster 1, H2be Gene [Source:MGI Symbol;Acc:MGI:2448380]
ENSMUST00000113717	6	23	27543	0.287586	Spna2	spectrin alpha 2 Gene [Source:MGI Symbol;Acc:MGI:98386]
ENSMUST00000111859	5	17	27543	0.289327	Rgl1	ral guanine nucleotide dissociation stimulator,-like 1 Gene [Source:MGI Symbol;Acc:MGI:107484]
ENSMUST00000052761	5	17	27543	0.289327	Idh3g	isocitrate dehydrogenase 3 (NAD+), gamma Gene [Source:MGI Symbol;Acc:MGI:1099463]
ENSMUST00000120260	5	17	27543	0.289327	Gm15784	predicted gene 15784 Pseudogene [Source:MGI Symbol;Acc:MGI:3783226]
ENSMUST00000058210	5	17	27543	0.289327	Eps8	epidermal growth factor receptor pathway substrate 8 Gene [Source:MGI Symbol;Acc:MGI:104684]
ENSMUST00000079345	5	17	27543	0.289327	Gm12715	predicted gene 12715 Pseudogene [Source:MGI Symbol;Acc:MGI:3650759]
ENSMUST00000059980	5	17	27543	0.289327	Rpl37a	ribosomal protein L37a Gene [Source:MGI Symbol;Acc:MGI:98068]
ENSMUST00000107193	5	17	27543	0.289327	Dlg2	discs, large homolog 2 (Drosophila) Gene [Source:MGI Symbol;Acc:MGI:1344351]
ENSMUST00000090257	5	17	27543	0.289327	Gm8225	predicted gene 8225 Gene [Source:MGI Symbol;Acc:MGI:3643826]
ENSMUST00000051565	5	17	27543	0.289327	Ulk4	unc-51-like kinase 4 (C. elegans) Gene [Source:MGI Symbol;Acc:MGI:1921622]
ENSMUST00000031420	5	17	27543	0.289327	Gpn3	GPN-loop GTPase 3 Gene [Source:MGI Symbol;Acc:MGI:1289326]
ENSMUST00000053025	5	17	27543	0.289327	NA	NA
ENSMUST00000103072	5	17	27543	0.289327	Strada	STE20-related kinase adaptor alpha Gene [Source:MGI Symbol;Acc:MGI:1919399]
ENSMUST00000115720	5	17	27543	0.289327	Pde10a	phosphodiesterase 10A Gene [Source:MGI Symbol;Acc:MGI:1345143]
ENSMUST00000116450	5	17	27543	0.289327	NA	NA
ENSMUST00000030940	5	17	27543	0.289327	Gnb1	guanine nucleotide binding protein (G protein), beta 1 Gene [Source:MGI Symbol;Acc:MGI:95781]
ENSMUST00000038230	5	17	27543	0.289327	Speg	SPEG complex locus Gene [Source:MGI Symbol;Acc:MGI:109282]
ENSMUST00000049263	5	17	27543	0.289327	Sltm	SAFB-like, transcription modulator Gene [Source:MGI Symbol;Acc:MGI:1913910]
ENSMUST00000107251	5	17	27543	0.289327	Pi4kb	phosphatidylinositol 4-kinase, catalytic, beta polypeptide Gene [Source:MGI Symbol;Acc:MGI:1334433]
ENSMUST00000051229	5	17	27543	0.289327	Etv5	ets variant gene 5 Gene [Source:MGI Symbol;Acc:MGI:1096867]
ENSMUST00000079157	5	17	27543	0.289327	Eya3	eyes absent 3 homolog (Drosophila) Gene [Source:MGI Symbol;Acc:MGI:109339]
ENSMUST00000024932	5	17	27543	0.289327	Atp6v0c	ATPase, H+ transporting, lysosomal V0 subunit C Gene [Source:MGI Symbol;Acc:MGI:88116]
ENSMUST00000121430	5	17	27543	0.289327	Gm12715	predicted gene 12715 Pseudogene [Source:MGI Symbol;Acc:MGI:3650759]
ENSMUST00000118763	5	17	27543	0.289327	Celf5	CUGBP, Elav-like family member 5 Gene [Source:MGI Symbol;Acc:MGI:2442333]
ENSMUST00000110431	5	17	27543	0.289327	NA	NA
ENSMUST00000099243	5	17	27543	0.289327	AC140325.3
ENSMUST00000106121	5	17	27543	0.289327	Fubp1	far upstream element (FUSE) binding protein 1 Gene [Source:MGI Symbol;Acc:MGI:1196294]
ENSMUST00000044443	5	17	27543	0.289327	Ank2	ankyrin 2, brain Gene [Source:MGI Symbol;Acc:MGI:88025]
ENSMUST00000056149	5	17	27543	0.289327	Abhd12	abhydrolase domain containing 12 Gene [Source:MGI Symbol;Acc:MGI:1923442]
ENSMUST00000044565	7	30	27543	0.307778	Col16a1	collagen, type XVI, alpha 1 Gene [Source:MGI Symbol;Acc:MGI:1095396]
ENSMUST00000052457	4	12	27543	0.319986	Mtss1l	metastasis suppressor 1-like Gene [Source:MGI Symbol;Acc:MGI:3039591]
ENSMUST00000119525	3	7	27543	0.319986	Gm11956	predicted gene 11956 Pseudogene [Source:MGI Symbol;Acc:MGI:3649806]
ENSMUST00000084436	3	7	27543	0.319986	Cend1	cell cycle exit and neuronal differentiation 1 Gene [Source:MGI Symbol;Acc:MGI:1929898]
ENSMUST00000111632	3	7	27543	0.319986	Ndrg2	N-myc downstream regulated gene 2 Gene [Source:MGI Symbol;Acc:MGI:1352498]
ENSMUST00000039913	3	7	27543	0.319986	9630033F20Rik	RIKEN cDNA 9630033F20 gene Gene [Source:MGI Symbol;Acc:MGI:2442752]
ENSMUST00000121981	3	7	27543	0.319986	Gm12453	predicted gene 12453 Pseudogene [Source:MGI Symbol;Acc:MGI:3650226]
ENSMUST00000122167	4	12	27543	0.319986	Gm16061	predicted gene 16061 Pseudogene [Source:MGI Symbol;Acc:MGI:3801920]
ENSMUST00000115408	4	12	27543	0.319986	Pdpk1	3-phosphoinositide dependent protein kinase 1 Gene [Source:MGI Symbol;Acc:MGI:1338068]
ENSMUST00000116400	4	12	27543	0.319986	2310037I24Rik	RIKEN cDNA 2310037I24 gene Gene [Source:MGI Symbol;Acc:MGI:1916862]
ENSMUST00000090512	3	7	27543	0.319986	Grm8	glutamate receptor, metabotropic 8 Gene [Source:MGI Symbol;Acc:MGI:1351345]
ENSMUST00000098774	4	12	27543	0.319986	NA	NA
ENSMUST00000077804	3	7	27543	0.319986	NA	NA
ENSMUST00000024099	3	7	27543	0.319986	Ache	acetylcholinesterase Gene [Source:MGI Symbol;Acc:MGI:87876]
ENSMUST00000021083	3	7	27543	0.319986	Hn1	hematological and neurological expressed sequence 1 Gene [Source:MGI Symbol;Acc:MGI:1096361]
ENSMUST00000077871	5	18	27543	0.319986	Grip1	glutamate receptor interacting protein 1 Gene [Source:MGI Symbol;Acc:MGI:1921303]
ENSMUST00000110417	3	7	27543	0.319986	Asah1	N-acylsphingosine amidohydrolase 1 Gene [Source:MGI Symbol;Acc:MGI:1277124]
ENSMUST00000116268	4	12	27543	0.319986	NA	NA
ENSMUST00000099144	4	12	27543	0.319986	AC122792.1
ENSMUST00000087360	4	12	27543	0.319986	Rbpj	recombination signal binding protein for immunoglobulin kappa J region Gene [Source:MGI Symbol;Acc:MGI:96522]
ENSMUST00000066837	3	7	27543	0.319986	Gm9933	predicted gene 9933 Gene [Source:MGI Symbol;Acc:MGI:3641937]
ENSMUST00000079828	4	12	27543	0.319986	Ntrk2	neurotrophic tyrosine kinase, receptor, type 2 Gene [Source:MGI Symbol;Acc:MGI:97384]
ENSMUST00000115803	3	7	27543	0.319986	Pdxdc1	pyridoxal-dependent decarboxylase domain containing 1 Gene [Source:MGI Symbol;Acc:MGI:1920909]
ENSMUST00000007444	5	18	27543	0.319986	Strada	STE20-related kinase adaptor alpha Gene [Source:MGI Symbol;Acc:MGI:1919399]
ENSMUST00000107801	3	7	27543	0.319986	Tead2	TEA domain family member 2 Gene [Source:MGI Symbol;Acc:MGI:104904]
ENSMUST00000107121	5	18	27543	0.319986	NA	NA
ENSMUST00000107506	6	24	27543	0.319986	Mup9	major urinary protein 9 Gene [Source:MGI Symbol;Acc:MGI:3782918]
ENSMUST00000099558	3	7	27543	0.319986	Tjp2	tight junction protein 2 Gene [Source:MGI Symbol;Acc:MGI:1341872]
ENSMUST00000119788	3	7	27543	0.319986	Lphn3	latrophilin 3 Gene [Source:MGI Symbol;Acc:MGI:2441950]
ENSMUST00000110430	5	18	27543	0.319986	NA	NA
ENSMUST00000023057	3	7	27543	0.319986	Nptxr	neuronal pentraxin receptor Gene [Source:MGI Symbol;Acc:MGI:1920590]
ENSMUST00000110452	4	12	27543	0.319986	Hist1h2bj	histone cluster 1, H2bj Gene [Source:MGI Symbol;Acc:MGI:2448388]
ENSMUST00000114317	5	18	27543	0.319986	Grin1	glutamate receptor, ionotropic, NMDA1 (zeta 1) Gene [Source:MGI Symbol;Acc:MGI:95819]
ENSMUST00000027940	3	7	27543	0.319986	Tmem206	transmembrane protein 206 Gene [Source:MGI Symbol;Acc:MGI:1914200]
ENSMUST00000040824	4	12	27543	0.319986	Dpm3	dolichyl-phosphate mannosyltransferase polypeptide 3 Gene [Source:MGI Symbol;Acc:MGI:1915813]
ENSMUST00000119411	5	18	27543	0.319986	Gm13921	predicted gene 13921 Pseudogene [Source:MGI Symbol;Acc:MGI:3651614]
ENSMUST00000018186	4	12	27543	0.319986	Cyb5r3	cytochrome b5 reductase 3 Gene [Source:MGI Symbol;Acc:MGI:94893]
ENSMUST00000117318	4	12	27543	0.319986	Gm11453	predicted gene 11453 Pseudogene [Source:MGI Symbol;Acc:MGI:3650734]
ENSMUST00000040001	5	18	27543	0.319986	Galnt9	UDP-N-acetyl-alpha-D-galactosamine:polypeptide N-acetylgalactosaminyltransferase 9 Gene [Source:MGI Symbol;Acc:MGI:2677965]
ENSMUST00000010007	3	7	27543	0.319986	Sdhb	succinate dehydrogenase complex, subunit B, iron sulfur (Ip) Gene [Source:MGI Symbol;Acc:MGI:1914930]
ENSMUST00000110468	6	24	27543	0.319986	Gm11277	predicted gene 11277 Gene [Source:MGI Symbol;Acc:MGI:3710645]
ENSMUST00000021607	4	12	27543	0.319986	Lgmn	legumain Gene [Source:MGI Symbol;Acc:MGI:1330838]
ENSMUST00000007236	3	7	27543	0.319986	Syngr3	synaptogyrin 3 Gene [Source:MGI Symbol;Acc:MGI:1341881]
ENSMUST00000076852	4	12	27543	0.319986	Unc5cl	unc-5 homolog C (C. elegans)-like Gene [Source:MGI Symbol;Acc:MGI:1923839]
ENSMUST00000036033	3	7	27543	0.319986	Dip2a	DIP2 disco-interacting protein 2 homolog A (Drosophila) Gene [Source:MGI Symbol;Acc:MGI:2385920]
ENSMUST00000031519	5	18	27543	0.319986	Cabp1	calcium binding protein 1 Gene [Source:MGI Symbol;Acc:MGI:1352750]
ENSMUST00000080723	4	12	27543	0.319986	Tax1bp1	Tax1 (human T-cell leukemia virus type I) binding protein 1 Gene [Source:MGI Symbol;Acc:MGI:1289308]
ENSMUST00000090924	4	12	27543	0.319986	Trim46	tripartite motif-containing 46 Gene [Source:MGI Symbol;Acc:MGI:2673000]
ENSMUST00000031587	3	7	27543	0.319986	Ung	uracil DNA glycosylase Gene [Source:MGI Symbol;Acc:MGI:109352]
ENSMUST00000121783	6	24	27543	0.319986	Golga7	golgi autoantigen, golgin subfamily a, 7 Gene [Source:MGI Symbol;Acc:MGI:1931029]
ENSMUST00000062071	3	7	27543	0.319986	NA	NA
ENSMUST00000039164	3	7	27543	0.319986	Lpar3	lysophosphatidic acid receptor 3 Gene [Source:MGI Symbol;Acc:MGI:1929469]
ENSMUST00000117522	4	12	27543	0.319986	1700071K01Rik	RIKEN cDNA 1700071K01 gene Pseudogene [Source:MGI Symbol;Acc:MGI:3588264]
ENSMUST00000030884	4	12	27543	0.319986	Mfn2	mitofusin 2 Gene [Source:MGI Symbol;Acc:MGI:2442230]
ENSMUST00000088906	3	7	27543	0.319986	Tsc22d1	TSC22 domain family, member 1 Gene [Source:MGI Symbol;Acc:MGI:109127]
ENSMUST00000061091	3	7	27543	0.319986	Synj2	synaptojanin 2 Gene [Source:MGI Symbol;Acc:MGI:1201671]
ENSMUST00000042163	5	18	27543	0.319986	Naa25	N(alpha)-acetyltransferase 25, NatB auxiliary subunit Gene [Source:MGI Symbol;Acc:MGI:2442563]
ENSMUST00000116637	4	12	27543	0.319986	NA	NA
ENSMUST00000033060	3	7	27543	0.319986	Tead2	TEA domain family member 2 Gene [Source:MGI Symbol;Acc:MGI:104904]
ENSMUST00000034301	3	7	27543	0.319986	Rab3a	RAB3A, member RAS oncogene family Gene [Source:MGI Symbol;Acc:MGI:97843]
ENSMUST00000054301	4	12	27543	0.319986	Lipe	lipase, hormone sensitive Gene [Source:MGI Symbol;Acc:MGI:96790]
ENSMUST00000066183	4	12	27543	0.319986	NA	NA
ENSMUST00000115461	4	12	27543	0.319986	Eif4g1	eukaryotic translation initiation factor 4, gamma 1 Gene [Source:MGI Symbol;Acc:MGI:2384784]
ENSMUST00000005711	4	12	27543	0.319986	Chmp2a	chromatin modifying protein 2A Gene [Source:MGI Symbol;Acc:MGI:1916203]
ENSMUST00000117993	5	18	27543	0.319986	Gm13641	predicted gene 13641 Pseudogene [Source:MGI Symbol;Acc:MGI:3651867]
ENSMUST00000108772	3	7	27543	0.319986	Rgs19	regulator of G-protein signaling 19 Gene [Source:MGI Symbol;Acc:MGI:1915153]
ENSMUST00000039445	3	7	27543	0.319986	NA	NA
ENSMUST00000120657	3	7	27543	0.319986	Gm12201	predicted gene 12201 Pseudogene [Source:MGI Symbol;Acc:MGI:3650183]
ENSMUST00000106707	4	12	27543	0.319986	Fam40a	family with sequence similarity 40, member A Gene [Source:MGI Symbol;Acc:MGI:2443884]
ENSMUST00000115477	5	18	27543	0.319986	Foxp2	forkhead box P2 Gene [Source:MGI Symbol;Acc:MGI:2148705]
ENSMUST00000081565	4	12	27543	0.319986	Gm12222	predicted gene 12222 Pseudogene [Source:MGI Symbol;Acc:MGI:3649523]
ENSMUST00000113503	4	12	27543	0.319986	Men1	multiple endocrine neoplasia 1 Gene [Source:MGI Symbol;Acc:MGI:1316736]
ENSMUST00000057520	3	7	27543	0.319986	Dock10	dedicator of cytokinesis 10 Gene [Source:MGI Symbol;Acc:MGI:2146320]
ENSMUST00000118351	3	7	27543	0.319986	Gm7332	predicted gene 7332 Pseudogene [Source:MGI Symbol;Acc:MGI:3643344]
ENSMUST00000111906	5	18	27543	0.319986	Kcnip2	Kv channel-interacting protein 2 Gene [Source:MGI Symbol;Acc:MGI:2135916]
ENSMUST00000100028	4	12	27543	0.319986	Dync1i2	dynein cytoplasmic 1 intermediate chain 2 Gene [Source:MGI Symbol;Acc:MGI:107750]
ENSMUST00000064234	4	12	27543	0.319986	Ezr	ezrin Gene [Source:MGI Symbol;Acc:MGI:98931]
ENSMUST00000108314	5	18	27543	0.319986	Supt6h	suppressor of Ty 6 homolog (S. cerevisiae) Gene [Source:MGI Symbol;Acc:MGI:107726]
ENSMUST00000111944	4	12	27543	0.319986	Mapk8	mitogen-activated protein kinase 8 Gene [Source:MGI Symbol;Acc:MGI:1346861]
ENSMUST00000074273	4	12	27543	0.319986	Dlg2	discs, large homolog 2 (Drosophila) Gene [Source:MGI Symbol;Acc:MGI:1344351]
ENSMUST00000100338	3	7	27543	0.319986	Gm10842	predicted gene 10842 Gene [Source:MGI Symbol;Acc:MGI:3642916]
ENSMUST00000008036	9	45	27543	0.319986	Rplp1	ribosomal protein, large, P1 Gene [Source:MGI Symbol;Acc:MGI:1927099]
ENSMUST00000093191	3	7	27543	0.319986	Ccdc99	coiled-coil domain containing 99 Gene [Source:MGI Symbol;Acc:MGI:1917635]
ENSMUST00000058841	4	12	27543	0.319986	Ubc	ubiquitin C Gene [Source:MGI Symbol;Acc:MGI:98889]
ENSMUST00000096273	4	12	27543	0.319986	Snx29	sorting nexin 29 Gene [Source:MGI Symbol;Acc:MGI:1921728]
ENSMUST00000098644	3	7	27543	0.319986	Prx	periaxin Gene [Source:MGI Symbol;Acc:MGI:108176]
ENSMUST00000107484	5	18	27543	0.319986	Mup17	major urinary protein 17 Gene [Source:MGI Symbol;Acc:MGI:3705217]
ENSMUST00000079504	6	24	27543	0.319986	NA	NA
ENSMUST00000119898	3	7	27543	0.319986	Gm9154	predicted gene 9154 Pseudogene [Source:MGI Symbol;Acc:MGI:3646595]
ENSMUST00000113680	4	12	27543	0.319986	NA	NA
ENSMUST00000109897	6	24	27543	0.319986	Ap1b1	adaptor protein complex AP-1, beta 1 subunit Gene [Source:MGI Symbol;Acc:MGI:1096368]
ENSMUST00000044681	3	7	27543	0.319986	Arl6ip5	ADP-ribosylation factor-like 6 interacting protein 5 Gene [Source:MGI Symbol;Acc:MGI:1929501]
ENSMUST00000075724	3	7	27543	0.319986	Rfxank	regulatory factor X-associated ankyrin-containing protein Gene [Source:MGI Symbol;Acc:MGI:1333865]
ENSMUST00000107044	3	7	27543	0.319986	Plekhb1	pleckstrin homology domain containing, family B (evectins) member 1 Gene [Source:MGI Symbol;Acc:MGI:1351469]
ENSMUST00000058845	4	12	27543	0.319986	Basp1	brain abundant, membrane attached signal protein 1 Gene [Source:MGI Symbol;Acc:MGI:1917600]
ENSMUST00000000793	3	7	27543	0.319986	Polr3d	polymerase (RNA) III (DNA directed) polypeptide D Gene [Source:MGI Symbol;Acc:MGI:1914315]
ENSMUST00000117876	3	7	27543	0.319986	Gm13886	predicted gene 13886 Pseudogene [Source:MGI Symbol;Acc:MGI:3649359]
ENSMUST00000117317	4	12	27543	0.319986	Gm5187	predicted gene 5187 Pseudogene [Source:MGI Symbol;Acc:MGI:3644132]
ENSMUST00000045692	3	7	27543	0.319986	Fbxl16	F-box and leucine-rich repeat protein 16 Gene [Source:MGI Symbol;Acc:MGI:2448488]
ENSMUST00000107094	4	12	27543	0.319986	Jun	Jun oncogene Gene [Source:MGI Symbol;Acc:MGI:96646]
ENSMUST00000093048	9	45	27543	0.319986	Tom1l2	target of myb1-like 2 (chicken) Gene [Source:MGI Symbol;Acc:MGI:2443306]
ENSMUST00000037636	4	12	27543	0.319986	Ina	internexin neuronal intermediate filament protein, alpha Gene [Source:MGI Symbol;Acc:MGI:96568]
ENSMUST00000048409	4	12	27543	0.319986	Elmod1	ELMO domain containing 1 Gene [Source:MGI Symbol;Acc:MGI:3583900]
ENSMUST00000107503	3	7	27543	0.319986	Syt11	synaptotagmin XI Gene [Source:MGI Symbol;Acc:MGI:1859547]
ENSMUST00000111539	3	7	27543	0.319986	Gm5074	predicted gene 5074 Gene [Source:MGI Symbol;Acc:MGI:3809200]
ENSMUST00000117512	4	12	27543	0.319986	Gm7222	predicted gene 7222 Pseudogene [Source:MGI Symbol;Acc:MGI:3642944]
ENSMUST00000106577	3	7	27543	0.319986	NA	NA
ENSMUST00000071419	4	12	27543	0.319986	Gm628	predicted gene 628 Gene [Source:MGI Symbol;Acc:MGI:2685474]
ENSMUST00000111857	4	12	27543	0.319986	Rgl1	ral guanine nucleotide dissociation stimulator,-like 1 Gene [Source:MGI Symbol;Acc:MGI:107484]
ENSMUST00000107233	4	12	27543	0.319986	Pip5k1a	phosphatidylinositol-4-phosphate 5-kinase, type 1 alpha Gene [Source:MGI Symbol;Acc:MGI:107929]
ENSMUST00000107843	4	12	27543	0.319986	Prmt1	protein arginine N-methyltransferase 1 Gene [Source:MGI Symbol;Acc:MGI:107846]
ENSMUST00000094868	3	7	27543	0.319986	Zfyve28	zinc finger, FYVE domain containing 28 Gene [Source:MGI Symbol;Acc:MGI:2684992]
ENSMUST00000053293	3	7	27543	0.319986	Zscan12	zinc finger and SCAN domain containing 12 Gene [Source:MGI Symbol;Acc:MGI:1099444]
ENSMUST00000033801	4	12	27543	0.319986	Plp1	proteolipid protein (myelin) 1 Gene [Source:MGI Symbol;Acc:MGI:97623]
ENSMUST00000105652	4	12	27543	0.319986	Acot7	acyl-CoA thioesterase 7 Gene [Source:MGI Symbol;Acc:MGI:1917275]
ENSMUST00000117582	6	24	27543	0.319986	Gm5940	predicted gene 5940 Pseudogene [Source:MGI Symbol;Acc:MGI:3648847]
ENSMUST00000063975	4	12	27543	0.319986	Disp2	dispatched homolog 2 (Drosophila) Gene [Source:MGI Symbol;Acc:MGI:2388733]
ENSMUST00000032963	4	12	27543	0.319986	Ppme1	protein phosphatase methylesterase 1 Gene [Source:MGI Symbol;Acc:MGI:1919840]
ENSMUST00000024639	4	12	27543	0.319986	Mtap2	microtubule-associated protein 2 Gene [Source:MGI Symbol;Acc:MGI:97175]
ENSMUST00000027287	5	18	27543	0.319986	Inpp4a	inositol polyphosphate-4-phosphatase, type I Gene [Source:MGI Symbol;Acc:MGI:1931123]
ENSMUST00000055704	3	7	27543	0.319986	Gnai2	guanine nucleotide binding protein (G protein), alpha inhibiting 2 Gene [Source:MGI Symbol;Acc:MGI:95772]
ENSMUST00000095940	4	12	27543	0.319986	Rpl21-ps5	ribosomal protein L21, pseudogene 5 Pseudogene [Source:MGI Symbol;Acc:MGI:3647087]
ENSMUST00000075491	4	12	27543	0.319986	Fkbp8	FK506 binding protein 8 Gene [Source:MGI Symbol;Acc:MGI:1341070]
ENSMUST00000035371	3	7	27543	0.319986	Sv2a	synaptic vesicle glycoprotein 2 a Gene [Source:MGI Symbol;Acc:MGI:1927139]
ENSMUST00000064240	3	7	27543	0.319986	Cbll1	Casitas B-lineage lymphoma-like 1 Gene [Source:MGI Symbol;Acc:MGI:2144842]
ENSMUST00000097810	4	12	27543	0.319986	Rims1	regulating synaptic membrane exocytosis 1 Gene [Source:MGI Symbol;Acc:MGI:2152971]
ENSMUST00000005281	3	7	27543	0.319986	Wdr83	WD repeat domain containing 83 Gene [Source:MGI Symbol;Acc:MGI:1915086]
ENSMUST00000121760	4	12	27543	0.319986	Gm5863	predicted gene 5863 Pseudogene [Source:MGI Symbol;Acc:MGI:3648580]
ENSMUST00000038384	4	12	27543	0.319986	Ythdc1	YTH domain containing 1 Gene [Source:MGI Symbol;Acc:MGI:2443713]
ENSMUST00000113502	4	12	27543	0.319986	Men1	multiple endocrine neoplasia 1 Gene [Source:MGI Symbol;Acc:MGI:1316736]
ENSMUST00000120226	3	7	27543	0.319986	Cdk4	cyclin-dependent kinase 4 Gene [Source:MGI Symbol;Acc:MGI:88357]
ENSMUST00000080061	4	12	27543	0.319986	Gm8724	predicted pseudogene 8724 Pseudogene [Source:MGI Symbol;Acc:MGI:3644570]
ENSMUST00000110901	3	7	27543	0.319986	Spred1	sprouty protein with EVH-1 domain 1, related sequence Gene [Source:MGI Symbol;Acc:MGI:2150016]
ENSMUST00000105368	4	12	27543	0.319986	Dos	downstream of Stk11 Gene [Source:MGI Symbol;Acc:MGI:1354170]
ENSMUST00000108050	4	12	27543	0.319986	2310028H24Rik	RIKEN cDNA 2310028H24 gene Gene [Source:MGI Symbol;Acc:MGI:1919151]
ENSMUST00000064642	4	12	27543	0.319986	Chid1	chitinase domain containing 1 Gene [Source:MGI Symbol;Acc:MGI:1915288]
ENSMUST00000099248	4	12	27543	0.319986	NA	NA
ENSMUST00000111492	3	7	27543	0.319986	Psmb5	proteasome (prosome, macropain) subunit, beta type 5 Gene [Source:MGI Symbol;Acc:MGI:1194513]
ENSMUST00000107235	3	7	27543	0.319986	Pip5k1a	phosphatidylinositol-4-phosphate 5-kinase, type 1 alpha Gene [Source:MGI Symbol;Acc:MGI:107929]
ENSMUST00000117243	4	12	27543	0.319986	Dctn6	dynactin 6 Gene [Source:MGI Symbol;Acc:MGI:1343154]
ENSMUST00000079327	4	12	27543	0.319986	Men1	multiple endocrine neoplasia 1 Gene [Source:MGI Symbol;Acc:MGI:1316736]
ENSMUST00000000109	5	18	27543	0.319986	Cntn1	contactin 1 Gene [Source:MGI Symbol;Acc:MGI:105980]
ENSMUST00000107814	3	7	27543	0.319986	Polr1e	polymerase (RNA) I polypeptide E Gene [Source:MGI Symbol;Acc:MGI:1929022]
ENSMUST00000118471	4	12	27543	0.319986	Klc1	kinesin light chain 1 Gene [Source:MGI Symbol;Acc:MGI:107978]
ENSMUST00000017078	4	12	27543	0.319986	Top1	topoisomerase (DNA) I Gene [Source:MGI Symbol;Acc:MGI:98788]
ENSMUST00000071968	4	12	27543	0.319986	Trpv4	transient receptor potential cation channel, subfamily V, member 4 Gene [Source:MGI Symbol;Acc:MGI:1926945]
ENSMUST00000053364	4	12	27543	0.319986	Aspm	asp (abnormal spindle)-like, microcephaly associated (Drosophila) Gene [Source:MGI Symbol;Acc:MGI:1334448]
ENSMUST00000108635	3	7	27543	0.319986	NA	NA
ENSMUST00000018875	6	24	27543	0.319986	Ap2b1	adaptor-related protein complex 2, beta 1 subunit Gene [Source:MGI Symbol;Acc:MGI:1919020]
ENSMUST00000081567	3	7	27543	0.319986	Mtf2	metal response element binding transcription factor 2 Gene [Source:MGI Symbol;Acc:MGI:105050]
ENSMUST00000102508	4	12	27543	0.319986	Capzb	capping protein (actin filament) muscle Z-line, beta Gene [Source:MGI Symbol;Acc:MGI:104652]
ENSMUST00000002655	4	12	27543	0.319986	1810046J19Rik	RIKEN cDNA 1810046J19 gene Gene [Source:MGI Symbol;Acc:MGI:1913678]
ENSMUST00000060050	4	12	27543	0.319986	Grrp1	glycine/arginine rich protein 1 Gene [Source:MGI Symbol;Acc:MGI:1919940]
ENSMUST00000120472	4	12	27543	0.319986	Afap1l1	actin filament associated protein 1-like 1 Gene [Source:MGI Symbol;Acc:MGI:2147199]
ENSMUST00000119362	4	12	27543	0.319986	Gm10230	predicted gene 10230 Gene [Source:MGI Symbol;Acc:MGI:3710515]
ENSMUST00000031697	3	7	27543	0.319986	Cul1	cullin 1 Gene [Source:MGI Symbol;Acc:MGI:1349658]
ENSMUST00000087985	3	7	27543	0.319986	Klra17	killer cell lectin-like receptor, subfamily A, member 17 Gene [Source:MGI Symbol;Acc:MGI:2180674]
ENSMUST00000092837	4	12	27543	0.319986	Taf15	TAF15 RNA polymerase II, TATA box binding protein (TBP)-associated factor Gene [Source:MGI Symbol;Acc:MGI:1917689]
ENSMUST00000101554	3	7	27543	0.319986	Ogdh	oxoglutarate dehydrogenase (lipoamide) Gene [Source:MGI Symbol;Acc:MGI:1098267]
ENSMUST00000087165	3	7	27543	0.319986	H2-M9	histocompatibility 2, M region locus 9 Gene [Source:MGI Symbol;Acc:MGI:1276570]
ENSMUST00000054310	3	7	27543	0.319986	Chchd8	coiled-coil-helix-coiled-coil-helix domain containing 8 Gene [Source:MGI Symbol;Acc:MGI:1915435]
ENSMUST00000050101	3	7	27543	0.319986	Zfp322a	zinc finger protein 322A Gene [Source:MGI Symbol;Acc:MGI:2442566]
ENSMUST00000060989	5	18	27543	0.319986	Sorl1	sortilin-related receptor, LDLR class A repeats-containing Gene [Source:MGI Symbol;Acc:MGI:1202296]
ENSMUST00000101063	3	7	27543	0.319986	Papola	poly (A) polymerase alpha Gene [Source:MGI Symbol;Acc:MGI:109301]
ENSMUST00000020826	4	12	27543	0.319986	Sap30l	SAP30-like Gene [Source:MGI Symbol;Acc:MGI:1354709]
ENSMUST00000002198	4	12	27543	0.319986	Sf3a1	splicing factor 3a, subunit 1 Gene [Source:MGI Symbol;Acc:MGI:1914715]
ENSMUST00000033824	4	12	27543	0.319986	Lamp1	lysosomal-associated membrane protein 1 Gene [Source:MGI Symbol;Acc:MGI:96745]
ENSMUST00000059667	3	7	27543	0.319986	Hpcal4	hippocalcin-like 4 Gene [Source:MGI Symbol;Acc:MGI:2157521]
ENSMUST00000121342	5	18	27543	0.319986	Gm13034	predicted gene 13034 Pseudogene [Source:MGI Symbol;Acc:MGI:3650252]
ENSMUST00000118726	5	18	27543	0.319986	Fam160a2	family with sequence similarity 160, member A2 Gene [Source:MGI Symbol;Acc:MGI:1921599]
ENSMUST00000038644	4	12	27543	0.319986	Rangrf	RAN guanine nucleotide release factor Gene [Source:MGI Symbol;Acc:MGI:1889073]
ENSMUST00000022634	4	12	27543	0.319986	Bnip3l	BCL2/adenovirus E1B interacting protein 3-like Gene [Source:MGI Symbol;Acc:MGI:1332659]
ENSMUST00000114954	3	7	27543	0.319986	Kalrn	kalirin, RhoGEF kinase Gene [Source:MGI Symbol;Acc:MGI:2685385]
ENSMUST00000077915	4	12	27543	0.319986	Rpl38	ribosomal protein L38 Gene [Source:MGI Symbol;Acc:MGI:1914921]
ENSMUST00000107046	3	7	27543	0.319986	Plekhb1	pleckstrin homology domain containing, family B (evectins) member 1 Gene [Source:MGI Symbol;Acc:MGI:1351469]
ENSMUST00000114048	4	12	27543	0.319986	Tmsb10	thymosin, beta 10 Gene [Source:MGI Symbol;Acc:MGI:109146]
ENSMUST00000108060	3	7	27543	0.319986	Ubap1	ubiquitin-associated protein 1 Gene [Source:MGI Symbol;Acc:MGI:2149543]
ENSMUST00000068006	4	12	27543	0.319986	Mocos	molybdenum cofactor sulfurase Gene [Source:MGI Symbol;Acc:MGI:1915841]
ENSMUST00000098047	6	24	27543	0.319986	Mup10	major urinary protein 10 Gene [Source:MGI Symbol;Acc:MGI:1924164]
ENSMUST00000078664	3	7	27543	0.319986	Clta	clathrin, light polypeptide (Lca) Gene [Source:MGI Symbol;Acc:MGI:894297]
ENSMUST00000113394	3	7	27543	0.319986	Gm16026	predicted pseudogene 16026 Pseudogene [Source:MGI Symbol;Acc:MGI:3783243]
ENSMUST00000119257	3	7	27543	0.319986	Gm11598	predicted gene 11598 Pseudogene [Source:MGI Symbol;Acc:MGI:3649374]
ENSMUST00000072237	4	12	27543	0.319986	Mink1	misshapen-like kinase 1 (zebrafish) Gene [Source:MGI Symbol;Acc:MGI:1355329]
ENSMUST00000107686	4	12	27543	0.319986	Atp5g1	ATP synthase, H+ transporting, mitochondrial F0 complex, subunit c1 (subunit 9) Gene [Source:MGI Symbol;Acc:MGI:107653]
ENSMUST00000097358	4	12	27543	0.319986	NA	NA
ENSMUST00000057634	3	7	27543	0.319986	Nrxn3	neurexin III Gene [Source:MGI Symbol;Acc:MGI:1096389]
ENSMUST00000092679	4	12	27543	0.319986	NA	NA
ENSMUST00000087231	4	12	27543	0.319986	Kctd8	potassium channel tetramerisation domain containing 8 Gene [Source:MGI Symbol;Acc:MGI:2443804]
ENSMUST00000118551	4	12	27543	0.319986	Rps14	ribosomal protein S14 Gene [Source:MGI Symbol;Acc:MGI:98107]
ENSMUST00000082283	3	7	27543	0.319986	Lsmd1	LSM domain containing 1 Gene [Source:MGI Symbol;Acc:MGI:1925554]
ENSMUST00000110470	6	24	27543	0.319986	Gm13646	predicted gene 13646 Gene [Source:MGI Symbol;Acc:MGI:3702051]
ENSMUST00000084338	3	7	27543	0.319986	Dmbx1	diencephalon/mesencephalon homeobox 1 Gene [Source:MGI Symbol;Acc:MGI:2153518]
ENSMUST00000076810	5	18	27543	0.319986	Kalrn	kalirin, RhoGEF kinase Gene [Source:MGI Symbol;Acc:MGI:2685385]
ENSMUST00000043273	4	12	27543	0.319986	U2af1l4	U2 small nuclear RNA auxiliary factor 1-like 4 Gene [Source:MGI Symbol;Acc:MGI:2678374]
ENSMUST00000071771	3	7	27543	0.319986	NA	NA
ENSMUST00000072866	3	7	27543	0.319986	Ubap1	ubiquitin-associated protein 1 Gene [Source:MGI Symbol;Acc:MGI:2149543]
ENSMUST00000054723	3	7	27543	0.319986	Polr1e	polymerase (RNA) I polypeptide E Gene [Source:MGI Symbol;Acc:MGI:1929022]
ENSMUST00000099329	4	12	27543	0.319986	Ube2n	ubiquitin-conjugating enzyme E2N Gene [Source:MGI Symbol;Acc:MGI:1934835]
ENSMUST00000024575	3	7	27543	0.319986	Rps6ka2	ribosomal protein S6 kinase, polypeptide 2 Gene [Source:MGI Symbol;Acc:MGI:1342290]
ENSMUST00000041611	4	12	27543	0.319986	Gas7	growth arrest specific 7 Gene [Source:MGI Symbol;Acc:MGI:1202388]
ENSMUST00000093924	3	7	27543	0.319986	Crhr1	corticotropin releasing hormone receptor 1 Gene [Source:MGI Symbol;Acc:MGI:88498]
ENSMUST00000078541	4	12	27543	0.319986	Ntrk2	neurotrophic tyrosine kinase, receptor, type 2 Gene [Source:MGI Symbol;Acc:MGI:97384]
ENSMUST00000003521	4	12	27543	0.319986	Rps11	ribosomal protein S11 Gene [Source:MGI Symbol;Acc:MGI:1351329]
ENSMUST00000118778	3	7	27543	0.319986	Gm4732	predicted gene 4732 Pseudogene [Source:MGI Symbol;Acc:MGI:3782912]
ENSMUST00000115190	3	7	27543	0.319986	Rhox2c	reproductive homeobox 2C Gene [Source:MGI Symbol;Acc:MGI:3770266]
ENSMUST00000102730	4	12	27543	0.319986	Tnip1	TNFAIP3 interacting protein 1 Gene [Source:MGI Symbol;Acc:MGI:1926194]
ENSMUST00000109421	4	12	27543	0.319986	Gdap1l1	ganglioside-induced differentiation-associated protein 1-like 1 Gene [Source:MGI Symbol;Acc:MGI:2385163]
ENSMUST00000032169	4	12	27543	0.319986	Abtb1	ankyrin repeat and BTB (POZ) domain containing 1 Gene [Source:MGI Symbol;Acc:MGI:1933148]
ENSMUST00000000137	3	7	27543	0.319986	Actr2	ARP2 actin-related protein 2 homolog (yeast) Gene [Source:MGI Symbol;Acc:MGI:1913963]
ENSMUST00000112628	3	7	27543	0.319986	NA	NA
ENSMUST00000010251	3	7	27543	0.319986	Slc22a8	solute carrier family 22 (organic anion transporter), member 8 Gene [Source:MGI Symbol;Acc:MGI:1336187]
ENSMUST00000116638	4	12	27543	0.319986	Syp	synaptophysin Gene [Source:MGI Symbol;Acc:MGI:98467]
ENSMUST00000096554	3	7	27543	0.319986	Apcdd1	adenomatosis polyposis coli down-regulated 1 Gene [Source:MGI Symbol;Acc:MGI:3513977]
ENSMUST00000010224	3	7	27543	0.319986	Epn3	epsin 3 Gene [Source:MGI Symbol;Acc:MGI:1919139]
ENSMUST00000071792	3	7	27543	0.319986	1110038F14Rik	RIKEN cDNA 1110038F14 gene Gene [Source:MGI Symbol;Acc:MGI:2152337]
ENSMUST00000102835	4	12	27543	0.319986	NA	NA
ENSMUST00000114842	4	12	27543	0.319986	Anks1	ankyrin repeat and SAM domain containing 1 Gene [Source:MGI Symbol;Acc:MGI:2446180]
ENSMUST00000109495	3	7	27543	0.319986	Homer1	homer homolog 1 (Drosophila) Gene [Source:MGI Symbol;Acc:MGI:1347345]
ENSMUST00000042566	3	7	27543	0.319986	NA	NA
ENSMUST00000081574	3	7	27543	0.319986	Syt17	synaptotagmin XVII Gene [Source:MGI Symbol;Acc:MGI:104966]
ENSMUST00000055662	4	12	27543	0.319986	Lrtm1	leucine-rich repeats and transmembrane domains 1 Gene [Source:MGI Symbol;Acc:MGI:2442106]
ENSMUST00000115045	4	12	27543	0.319986	NA	NA
ENSMUST00000062376	8	39	27543	0.360182	Dip2c	DIP2 disco-interacting protein 2 homolog C (Drosophila) Gene [Source:MGI Symbol;Acc:MGI:1920179]
ENSMUST00000105497	2	3	27543	0.366727	Ostm1	osteopetrosis associated transmembrane protein 1 Gene [Source:MGI Symbol;Acc:MGI:2655574]
ENSMUST00000110139	2	3	27543	0.366727	2310045N01Rik	RIKEN cDNA 2310045N01 gene Gene [Source:MGI Symbol;Acc:MGI:1919618]
ENSMUST00000103618	2	3	27543	0.366727	Gm10898	predicted gene 10898 Gene [Source:MGI Symbol;Acc:MGI:3782086]
ENSMUST00000002344	2	3	27543	0.366727	Metrn	meteorin, glial cell differentiation regulator Gene [Source:MGI Symbol;Acc:MGI:1917333]
ENSMUST00000117320	2	3	27543	0.366727	Gm15578	predicted gene 15578 Pseudogene [Source:MGI Symbol;Acc:MGI:3783026]
ENSMUST00000112165	2	3	27543	0.366727	Olfr239	olfactory receptor 239 Gene [Source:MGI Symbol;Acc:MGI:3030073]
ENSMUST00000074403	2	3	27543	0.366727	Ces3b	carboxylesterase 3B Gene [Source:MGI Symbol;Acc:MGI:3644960]
ENSMUST00000118995	2	3	27543	0.366727	Gm14874	predicted gene 14874 Pseudogene [Source:MGI Symbol;Acc:MGI:3802170]
ENSMUST00000117372	2	3	27543	0.366727	Gm7110	predicted gene 7110 Pseudogene [Source:MGI Symbol;Acc:MGI:3648264]
ENSMUST00000109598	2	3	27543	0.366727	Romo1	reactive oxygen species modulator 1 Gene [Source:MGI Symbol;Acc:MGI:1914317]
ENSMUST00000121384	2	3	27543	0.366727	Gm12403	predicted gene 12403 Pseudogene [Source:MGI Symbol;Acc:MGI:3650109]
ENSMUST00000107664	2	3	27543	0.366727	Sh3d19	SH3 domain protein D19 Gene [Source:MGI Symbol;Acc:MGI:1350923]
ENSMUST00000107750	2	3	27543	0.366727	Tbc1d2	TBC1 domain family, member 2 Gene [Source:MGI Symbol;Acc:MGI:2652885]
ENSMUST00000105000	2	3	27543	0.366727	NA	NA
ENSMUST00000111089	2	3	27543	0.366727	Nefm	neurofilament, medium polypeptide Gene [Source:MGI Symbol;Acc:MGI:97314]
ENSMUST00000119610	2	3	27543	0.366727	Rerg	RAS-like, estrogen-regulated, growth-inhibitor Gene [Source:MGI Symbol;Acc:MGI:2665139]
ENSMUST00000109692	2	3	27543	0.366727	NA	NA
ENSMUST00000088610	2	3	27543	0.366727	Romo1	reactive oxygen species modulator 1 Gene [Source:MGI Symbol;Acc:MGI:1914317]
ENSMUST00000111090	2	3	27543	0.366727	Znhit1	zinc finger, HIT domain containing 1 Gene [Source:MGI Symbol;Acc:MGI:1917353]
ENSMUST00000071246	2	3	27543	0.366727	NA	NA
ENSMUST00000084823	2	3	27543	0.366727	Ptprn2	protein tyrosine phosphatase, receptor type, N polypeptide 2 Gene [Source:MGI Symbol;Acc:MGI:107418]
ENSMUST00000065813	2	3	27543	0.366727	NA	NA
ENSMUST00000115412	2	3	27543	0.366727	A830018L16Rik	RIKEN cDNA A830018L16 gene Gene [Source:MGI Symbol;Acc:MGI:2444149]
ENSMUST00000118131	2	3	27543	0.366727	Gm8503	predicted gene 8503 Pseudogene [Source:MGI Symbol;Acc:MGI:3646324]
[truncated: 697 more rows]

## Sheet: Up_regulated_24h
Transcript ID (Ensembl)	Q&T	T	Q	p-value	Gene Symbol	Gene Description
[truncated: 4,933 more rows]

## Sheet: Down_regulated_24h
Transcript ID (Ensembl)	Q&T	T	Q	p-value	Gene Symbol	Gene Description
[truncated: 4,567 more rows]
