# Supplementary material for: Neuroglobin-Deficiency Exacerbates Hif1A and c-FOS Response, but Does Not Affect Neuronal Survival during Severe Hypoxia In Vivo
Source: PLoS One. 2011 Dec 2;6(12):e28160. doi: 10.1371/journal.pone.0028160 (PMC3229544; doi:10.1371/journal.pone.0028160)
Supplement: Table S7 — Transcripts with most reliable response to hypoxia in wt mice. The table was created by rank-ordering differentially expressed transcripts based on the ascending product of their adjusted p-values after 90 minutes and 24 hours of hypoxia. (XLS) [file pone.0028160.s008.xls]

## Sheet: 90 min of hypoxia
Transcript ID (Ensembl)	Differential Expression	p-value in wt	ppv	Gene Symbol	Description
ENSMUST00000110354	higher	1.71592e-10	2.25201e-19	Srsf5	serine/arginine-rich splicing factor 5 Gene [Source:MGI Symbol;Acc:MGI:98287]
ENSMUST00000110356	higher	1.811e-10	3.27338e-19	Srsf5	serine/arginine-rich splicing factor 5 Gene [Source:MGI Symbol;Acc:MGI:98287]
ENSMUST00000115617	higher	8.49731e-07	1.11521e-15	Rbm3	RNA binding motif protein 3 Gene [Source:MGI Symbol;Acc:MGI:1099460]
ENSMUST00000025519	lower	8.67803e-05	1.84369e-13	Camk2a	calcium/calmodulin-dependent protein kinase II alpha Gene [Source:MGI Symbol;Acc:MGI:88256]
ENSMUST00000102888	lower	8.67803e-05	1.84369e-13	Camk2a	calcium/calmodulin-dependent protein kinase II alpha Gene [Source:MGI Symbol;Acc:MGI:88256]
ENSMUST00000099356	higher	8.49731e-07	2.75849e-13	Arrdc3	arrestin domain containing 3 Gene [Source:MGI Symbol;Acc:MGI:2145242]
ENSMUST00000115621	higher	8.49731e-07	2.75849e-13	Rbm3	RNA binding motif protein 3 Gene [Source:MGI Symbol;Acc:MGI:1099460]
ENSMUST00000115619	higher	4.05489e-07	6.87932e-13	Rbm3	RNA binding motif protein 3 Gene [Source:MGI Symbol;Acc:MGI:1099460]
ENSMUST00000067925	higher	0.000352528	2.00221e-12	Hmgb2	high mobility group box 2 Gene [Source:MGI Symbol;Acc:MGI:96157]
ENSMUST00000049093	higher	8.49731e-07	2.74797e-12	Txnip	thioredoxin interacting protein Gene [Source:MGI Symbol;Acc:MGI:1889549]
ENSMUST00000115615	higher	9.01725e-06	2.92728e-12	Rbm3	RNA binding motif protein 3 Gene [Source:MGI Symbol;Acc:MGI:1099460]
ENSMUST00000027195	lower	1.32651e-05	3.03544e-12	NA	NA
ENSMUST00000071901	higher	1.518e-05	1.16529e-11	NA	NA
ENSMUST00000115620	higher	1.518e-05	1.16529e-11	Rbm3	RNA binding motif protein 3 Gene [Source:MGI Symbol;Acc:MGI:1099460]
ENSMUST00000121422	higher	1.518e-05	1.16529e-11	Gm15453	predicted gene 15453 Pseudogene [Source:MGI Symbol;Acc:MGI:3642874]
ENSMUST00000094693	higher	1.59602e-06	1.41206e-11	Srsf5	serine/arginine-rich splicing factor 5 Gene [Source:MGI Symbol;Acc:MGI:98287]
ENSMUST00000108817	lower	0.0105544	2.24233e-11	Hist3h2a	histone cluster 3, H2a Gene [Source:MGI Symbol;Acc:MGI:2448458]
ENSMUST00000074556	lower	7.41065e-07	4.73339e-11	H2afj	H2A histone family, member J Gene [Source:MGI Symbol;Acc:MGI:3606192]
ENSMUST00000074519	higher	1.78835e-05	7.87172e-11	Txnip	thioredoxin interacting protein Gene [Source:MGI Symbol;Acc:MGI:1889549]
ENSMUST00000096987	lower	4.243e-06	1.39574e-10	Sept5	septin 5 Gene [Source:MGI Symbol;Acc:MGI:1195461]
ENSMUST00000032194	higher	1.80829e-05	1.59987e-10	Bhlhe40	basic helix-loop-helix family, member e40 Gene [Source:MGI Symbol;Acc:MGI:1097714]
ENSMUST00000103146	higher	0.00042831	1.82712e-10	Rpl23	ribosomal protein L23 Gene [Source:MGI Symbol;Acc:MGI:1929455]
ENSMUST00000110351	higher	1.59602e-06	2.27967e-10	Srsf5	serine/arginine-rich splicing factor 5 Gene [Source:MGI Symbol;Acc:MGI:98287]
ENSMUST00000122364	higher	8.50068e-05	3.70831e-10	Gm10156	predicted gene 10156 Pseudogene [Source:MGI Symbol;Acc:MGI:3642344]
ENSMUST00000029722	higher	4.05489e-07	5.01979e-10	Rps3a	ribosomal protein S3A Gene [Source:MGI Symbol;Acc:MGI:1202063]
ENSMUST00000115616	higher	9.01725e-06	5.4971e-10	Rbm3	RNA binding motif protein 3 Gene [Source:MGI Symbol;Acc:MGI:1099460]
ENSMUST00000110352	higher	4.96601e-05	8.94479e-10	Srsf5	serine/arginine-rich splicing factor 5 Gene [Source:MGI Symbol;Acc:MGI:98287]
ENSMUST00000021506	lower	3.36149e-05	1.0447e-09	Serpina3n	serine (or cysteine) peptidase inhibitor, clade A, member 3N Gene [Source:MGI Symbol;Acc:MGI:105045]
ENSMUST00000111996	higher	0.000301259	1.32604e-09	Atp5g3	ATP synthase, H+ transporting, mitochondrial F0 complex, subunit C3 (subunit 9) Gene [Source:MGI Symbol;Acc:MGI:2442035]
ENSMUST00000091746	lower	1.77687e-07	1.39282e-09	NA	NA
ENSMUST00000048642	higher	1.78835e-05	2.19689e-09	Parl	presenilin associated, rhomboid-like Gene [Source:MGI Symbol;Acc:MGI:1277152]
ENSMUST00000033683	higher	3.09401e-06	3.83026e-09	Rps4x	ribosomal protein S4, X-linked Gene [Source:MGI Symbol;Acc:MGI:98158]
ENSMUST00000078981	higher	0.00296877	5.07406e-09	NA	NA
ENSMUST00000040010	higher	0.000115171	6.75478e-09	Rbm3	RNA binding motif protein 3 Gene [Source:MGI Symbol;Acc:MGI:1099460]
ENSMUST00000106157	higher	4.85633e-06	8.09338e-09	Zranb1	zinc finger, RAN-binding domain containing 1 Gene [Source:MGI Symbol;Acc:MGI:106441]
ENSMUST00000090771	higher	4.15939e-05	9.24329e-09	Txnip	thioredoxin interacting protein Gene [Source:MGI Symbol;Acc:MGI:1889549]
ENSMUST00000109351	higher	0.000664781	1.19741e-08	NA	NA
ENSMUST00000079030	lower	7.41065e-07	1.98059e-08	NA	NA
ENSMUST00000021562	higher	6.45679e-05	1.99907e-08	Srsf5	serine/arginine-rich splicing factor 5 Gene [Source:MGI Symbol;Acc:MGI:98287]
ENSMUST00000102536	higher	0.000292788	2.31519e-08	Rpl11	ribosomal protein L11 Gene [Source:MGI Symbol;Acc:MGI:1914275]
ENSMUST00000072372	higher	1.78835e-05	2.88037e-08	NA	NA
ENSMUST00000016703	higher	0.000301259	3.7008e-08	H3f3b	H3 histone, family 3B Gene [Source:MGI Symbol;Acc:MGI:1101768]
ENSMUST00000027997	higher	1.19332e-05	4.1096e-08	Rgs5	regulator of G-protein signaling 5 Gene [Source:MGI Symbol;Acc:MGI:1098434]
ENSMUST00000052135	higher	0.0149293	4.82804e-08	Rbbp6	retinoblastoma binding protein 6 Gene [Source:MGI Symbol;Acc:MGI:894835]
ENSMUST00000071590	higher	0.0149293	4.82804e-08	Rbbp6	retinoblastoma binding protein 6 Gene [Source:MGI Symbol;Acc:MGI:894835]
ENSMUST00000115231	higher	4.62748e-06	5.9243e-08	Rpl39	ribosomal protein L39 Gene [Source:MGI Symbol;Acc:MGI:1914498]
ENSMUST00000102977	lower	7.22362e-05	6.41116e-08	Hist1h4i	histone cluster 1, H4i Gene [Source:MGI Symbol;Acc:MGI:2448432]
ENSMUST00000106138	lower	0.0016175	6.70611e-08	Prkacb	protein kinase, cAMP dependent, catalytic, beta Gene [Source:MGI Symbol;Acc:MGI:97594]
ENSMUST00000025327	higher	0.000119136	8.68014e-08	NA	NA
ENSMUST00000075596	lower	3.36149e-05	9.16582e-08	NA	NA
ENSMUST00000102967	lower	4.243e-06	1.48054e-07	Hist1h4c	histone cluster 1, H4c Gene [Source:MGI Symbol;Acc:MGI:2448421]
ENSMUST00000018914	higher	4.96601e-05	1.49946e-07	Atp5g3	ATP synthase, H+ transporting, mitochondrial F0 complex, subunit C3 (subunit 9) Gene [Source:MGI Symbol;Acc:MGI:2442035]
ENSMUST00000004316	lower	0.0452111	2.10524e-07	Psap	prosaposin Gene [Source:MGI Symbol;Acc:MGI:97783]
ENSMUST00000101465	higher	0.0371888	2.9181e-07	Usp34	ubiquitin specific peptidase 34 Gene [Source:MGI Symbol;Acc:MGI:109473]
ENSMUST00000090417	higher	0.000241776	3.36014e-07	F3	coagulation factor III Gene [Source:MGI Symbol;Acc:MGI:88381]
ENSMUST00000090749	higher	1.518e-05	3.92029e-07	Ppia	peptidylprolyl isomerase A Gene [Source:MGI Symbol;Acc:MGI:97749]
ENSMUST00000086880	higher	0.000543992	4.18204e-07	Armcx3	armadillo repeat containing, X-linked 3 Gene [Source:MGI Symbol;Acc:MGI:1918953]
ENSMUST00000070402	higher	0.0226489	4.32171e-07	Usp34	ubiquitin specific peptidase 34 Gene [Source:MGI Symbol;Acc:MGI:109473]
ENSMUST00000102979	lower	1.32651e-05	5.09384e-07	Hist1h4m	histone cluster 1, H4m Gene [Source:MGI Symbol;Acc:MGI:2448441]
ENSMUST00000104941	lower	1.32651e-05	5.09384e-07	Gm11275	predicted gene 11275 Gene [Source:MGI Symbol;Acc:MGI:3711960]
ENSMUST00000073009	lower	8.67803e-05	5.26334e-07	NA	NA
ENSMUST00000102971	lower	3.36149e-05	5.86515e-07	Hist1h4f	histone cluster 1, H4f Gene [Source:MGI Symbol;Acc:MGI:2448425]
ENSMUST00000027232	higher	1.518e-05	6.38004e-07	Ptp4a1	protein tyrosine phosphatase 4a1 Gene [Source:MGI Symbol;Acc:MGI:1277096]
ENSMUST00000103139	lower	3.19771e-05	8.11947e-07	Thra	thyroid hormone receptor alpha Gene [Source:MGI Symbol;Acc:MGI:98742]
ENSMUST00000109813	lower	0.00218573	8.97761e-07	Camk2b	calcium/calmodulin-dependent protein kinase II, beta Gene [Source:MGI Symbol;Acc:MGI:88257]
