# Supplementary material for: Neuroglobin-Deficiency Exacerbates Hif1A and c-FOS Response, but Does Not Affect Neuronal Survival during Severe Hypoxia In Vivo
Source: PLoS One. 2011 Dec 2;6(12):e28160. doi: 10.1371/journal.pone.0028160 (PMC3229544; doi:10.1371/journal.pone.0028160)
Supplement: Table S8 — Transcripts with most reliable response to hypoxia in Ngb-deficient mice. The table was created by rank-ordering differentially expressed transcripts based on the ascending product of their adjusted p-values after 90 minutes and 24 hours of hypoxia. (XLS) [file pone.0028160.s009.xls]

## Sheet: 24h of hypoxia
Transcript ID (Ensembl)	Differential Expression	p-value in wt	ppv	Gene Symbol	Description
ENSMUST00000039267	higher	2.3136e-49	5.43055e-88	Chd7	chromodomain helicase DNA binding protein 7 Gene [Source:MGI Symbol;Acc:MGI:2444748]
ENSMUST00000051558	higher	2.3136e-49	5.43055e-88	Chd7	chromodomain helicase DNA binding protein 7 Gene [Source:MGI Symbol;Acc:MGI:2444748]
ENSMUST00000114688	lower	3.56861e-19	7.42909e-42	NA	NA
ENSMUST00000043675	lower	5.72388e-18	1.2616e-40	Atp5l	ATP synthase, H+ transporting, mitochondrial F0 complex, subunit g Gene [Source:MGI Symbol;Acc:MGI:1351597]
ENSMUST00000107944	lower	6.90046e-17	3.16336e-39	NA	NA
ENSMUST00000093955	lower	1.10521e-16	3.89347e-37	Supt4h1	suppressor of Ty 4 homolog 1 (S. cerevisiae) Gene [Source:MGI Symbol;Acc:MGI:107416]
ENSMUST00000082170	lower	6.33901e-20	7.0948e-37	Fat3	FAT tumor suppressor homolog 3 (Drosophila) Gene [Source:MGI Symbol;Acc:MGI:2444314]
ENSMUST00000109587	higher	2.57685e-21	4.2413e-36	Rbm39	RNA binding motif protein 39 Gene [Source:MGI Symbol;Acc:MGI:2157953]
ENSMUST00000115617	higher	2.83158e-18	1.62315e-33	Rbm3	RNA binding motif protein 3 Gene [Source:MGI Symbol;Acc:MGI:1099460]
ENSMUST00000115615	higher	6.25113e-15	1.5728e-27	Rbm3	RNA binding motif protein 3 Gene [Source:MGI Symbol;Acc:MGI:1099460]
ENSMUST00000029149	higher	2.83158e-18	5.97751e-27	Rbm39	RNA binding motif protein 39 Gene [Source:MGI Symbol;Acc:MGI:2157953]
ENSMUST00000115616	higher	6.25113e-15	9.04574e-26	Rbm3	RNA binding motif protein 3 Gene [Source:MGI Symbol;Acc:MGI:1099460]
ENSMUST00000115619	higher	5.76345e-14	1.13252e-25	Rbm3	RNA binding motif protein 3 Gene [Source:MGI Symbol;Acc:MGI:1099460]
ENSMUST00000071901	higher	5.76345e-14	1.25682e-25	NA	NA
ENSMUST00000115620	higher	5.76345e-14	1.25682e-25	Rbm3	RNA binding motif protein 3 Gene [Source:MGI Symbol;Acc:MGI:1099460]
ENSMUST00000121422	higher	5.76345e-14	1.25682e-25	Gm15453	predicted gene 15453 Pseudogene [Source:MGI Symbol;Acc:MGI:3642874]
ENSMUST00000067925	higher	2.83158e-18	1.83607e-25	Hmgb2	high mobility group box 2 Gene [Source:MGI Symbol;Acc:MGI:96157]
ENSMUST00000054289	lower	1.06473e-14	2.24535e-25	Rps2	ribosomal protein S2 Gene [Source:MGI Symbol;Acc:MGI:105110]
ENSMUST00000110088	higher	6.69384e-11	9.03694e-25	Phf20l1	PHD finger protein 20-like 1 Gene [Source:MGI Symbol;Acc:MGI:2444412]
ENSMUST00000106540	higher	2.09418e-12	4.11508e-24	Amy1	amylase 1, salivary Gene [Source:MGI Symbol;Acc:MGI:88019]
ENSMUST00000037776	higher	5.76345e-14	5.24516e-24	Srsf3	serine/arginine-rich splicing factor 3 Gene [Source:MGI Symbol;Acc:MGI:98285]
ENSMUST00000122364	higher	6.90357e-13	9.98986e-24	Gm10156	predicted gene 10156 Pseudogene [Source:MGI Symbol;Acc:MGI:3642344]
ENSMUST00000115621	higher	4.76822e-11	6.89989e-22	Rbm3	RNA binding motif protein 3 Gene [Source:MGI Symbol;Acc:MGI:1099460]
ENSMUST00000040010	higher	8.89265e-12	9.56545e-22	Rbm3	RNA binding motif protein 3 Gene [Source:MGI Symbol;Acc:MGI:1099460]
ENSMUST00000110498	lower	2.10538e-11	1.21582e-21	Hsph1	heat shock 105kDa/110kDa protein 1 Gene [Source:MGI Symbol;Acc:MGI:105053]
ENSMUST00000057944	lower	2.26197e-11	1.30625e-21	Ugt8a	UDP galactosyltransferase 8A Gene [Source:MGI Symbol;Acc:MGI:109522]
ENSMUST00000020024	lower	9.62201e-10	1.33705e-21	Fabp7	fatty acid binding protein 7, brain Gene [Source:MGI Symbol;Acc:MGI:101916]
ENSMUST00000086013	lower	1.78111e-10	1.5158e-21	Gm10175	predicted gene 10175 Pseudogene [Source:MGI Symbol;Acc:MGI:3704287]
ENSMUST00000089182	lower	1.78111e-10	1.5158e-21	Gm10231	predicted pseudogene 10231 Pseudogene [Source:MGI Symbol;Acc:MGI:3704468]
ENSMUST00000110771	lower	1.78111e-10	1.5158e-21	CT571241.1
ENSMUST00000007797	lower	5.18021e-07	1.52031e-21	Gabrb2	gamma-aminobutyric acid (GABA) A receptor, subunit beta 2 Gene [Source:MGI Symbol;Acc:MGI:95620]
ENSMUST00000037739	higher	6.90357e-13	1.33364e-20	Gnl3	guanine nucleotide binding protein-like 3 (nucleolar) Gene [Source:MGI Symbol;Acc:MGI:1353651]
ENSMUST00000107196	lower	5.10958e-09	2.39113e-20	Dlg2	discs, large homolog 2 (Drosophila) Gene [Source:MGI Symbol;Acc:MGI:1344351]
ENSMUST00000075431	lower	2.65676e-10	3.01596e-20	NA	NA
ENSMUST00000082057	lower	2.16088e-13	4.94399e-20	Gtf2i	general transcription factor II I Gene [Source:MGI Symbol;Acc:MGI:1202722]
ENSMUST00000111147	lower	2.14638e-09	5.18389e-20	Caprin1	cell cycle associated protein 1 Gene [Source:MGI Symbol;Acc:MGI:1858234]
ENSMUST00000068042	higher	2.16786e-11	1.99419e-19	Dis3	DIS3 mitotic control homolog (S. cerevisiae) Gene [Source:MGI Symbol;Acc:MGI:1919912]
ENSMUST00000119350	higher	2.57517e-10	1.0521e-18	Hmgb1-ps1	high mobility group box 1, pseudogene 1 Pseudogene [Source:MGI Symbol;Acc:MGI:3768536]
ENSMUST00000067980	higher	1.2635e-07	1.73223e-18	Amy1	amylase 1, salivary Gene [Source:MGI Symbol;Acc:MGI:88019]
ENSMUST00000076410	lower	3.62125e-09	1.75432e-18	Hsph1	heat shock 105kDa/110kDa protein 1 Gene [Source:MGI Symbol;Acc:MGI:105053]
ENSMUST00000075898	lower	1.78111e-10	1.78379e-18	Gm5921	predicted gene 5921 Gene [Source:MGI Symbol;Acc:MGI:3648968]
ENSMUST00000106429	lower	4.66501e-08	2.69397e-18	1810037I17Rik	RIKEN cDNA 1810037I17 gene Gene [Source:MGI Symbol;Acc:MGI:1914954]
ENSMUST00000088299	lower	7.60226e-08	3.21843e-18	Gm10221	predicted gene 10221 Pseudogene [Source:MGI Symbol;Acc:MGI:3708709]
ENSMUST00000107193	lower	2.20885e-06	3.95866e-18	Dlg2	discs, large homolog 2 (Drosophila) Gene [Source:MGI Symbol;Acc:MGI:1344351]
ENSMUST00000106157	higher	8.62641e-12	4.60051e-18	Zranb1	zinc finger, RAN-binding domain containing 1 Gene [Source:MGI Symbol;Acc:MGI:106441]
ENSMUST00000071375	higher	3.88992e-10	4.76188e-18	NA	NA
ENSMUST00000073196	higher	3.88992e-10	4.76188e-18	Gm10075	predicted gene 10075 Pseudogene [Source:MGI Symbol;Acc:MGI:3710521]
ENSMUST00000117548	higher	3.88992e-10	4.76188e-18	Gm15059	predicted gene 15059 Pseudogene [Source:MGI Symbol;Acc:MGI:3705529]
ENSMUST00000118415	higher	3.88992e-10	4.76188e-18	Hmgb1-ps3	high mobility group box 1, pseudogene 3 Pseudogene [Source:MGI Symbol;Acc:MGI:3768539]
ENSMUST00000120421	higher	3.88992e-10	4.76188e-18	Gm15387	predicted gene 15387 Pseudogene [Source:MGI Symbol;Acc:MGI:3705374]
ENSMUST00000093196	higher	3.62433e-11	5.20007e-18	Hmgb1	high mobility group box 1 Gene [Source:MGI Symbol;Acc:MGI:96113]
ENSMUST00000085546	higher	3.88992e-10	6.42079e-18	Hmgb1	high mobility group box 1 Gene [Source:MGI Symbol;Acc:MGI:96113]
ENSMUST00000121705	lower	1.78111e-10	6.77997e-18	Stx4a	syntaxin 4A (placental) Gene [Source:MGI Symbol;Acc:MGI:893577]
ENSMUST00000100687	higher	9.65472e-10	7.92301e-18	Gm16439	predicted pseudogene 16439 Pseudogene [Source:MGI Symbol;Acc:MGI:3647611]
ENSMUST00000113438	higher	7.94275e-05	8.61268e-18	Adamts9	a disintegrin-like and metallopeptidase (reprolysin type) with thrombospondin type 1 motif, 9 Gene [Source:MGI Symbol;Acc:MGI:1916320]
ENSMUST00000049294	lower	9.91163e-07	1.08064e-17	Snrpd2	small nuclear ribonucleoprotein D2 Gene [Source:MGI Symbol;Acc:MGI:98345]
ENSMUST00000121816	higher	6.03909e-10	1.14836e-16	Gm13232	predicted gene 13232 Pseudogene [Source:MGI Symbol;Acc:MGI:3649252]
ENSMUST00000122151	higher	6.03909e-10	1.14836e-16	Gm13237	predicted gene 13237 Pseudogene [Source:MGI Symbol;Acc:MGI:3649924]
ENSMUST00000118720	lower	5.10958e-09	1.37739e-16	Gm11599	predicted gene 11599 Pseudogene [Source:MGI Symbol;Acc:MGI:3651840]
ENSMUST00000113767	higher	1.52549e-08	1.40328e-16	Odf2	outer dense fiber of sperm tails 2 Gene [Source:MGI Symbol;Acc:MGI:1098824]
ENSMUST00000079261	lower	2.71642e-07	1.86574e-16	Gm10420	predicted gene 10420 Pseudogene [Source:MGI Symbol;Acc:MGI:3704275]
ENSMUST00000034214	higher	1.02555e-10	2.14535e-16	Mt2	metallothionein 2 Gene [Source:MGI Symbol;Acc:MGI:97172]
ENSMUST00000033075	lower	4.66501e-08	2.22367e-16	Stx4a	syntaxin 4A (placental) Gene [Source:MGI Symbol;Acc:MGI:893577]
ENSMUST00000106255	lower	1.35261e-09	2.66888e-16	Cap1	CAP, adenylate cyclase-associated protein 1 (yeast) Gene [Source:MGI Symbol;Acc:MGI:88262]
ENSMUST00000118577	lower	1.35261e-09	2.66888e-16	Gm16418	predicted pseudogene 16418 Pseudogene [Source:MGI Symbol;Acc:MGI:3644548]
ENSMUST00000073471	higher	0.0111388	2.94236e-16	Rpl26	ribosomal protein L26 Gene [Source:MGI Symbol;Acc:MGI:106022]
ENSMUST00000113755	higher	1.21705e-07	3.35656e-16	Odf2	outer dense fiber of sperm tails 2 Gene [Source:MGI Symbol;Acc:MGI:1098824]
ENSMUST00000119927	higher	5.62359e-09	3.64647e-16	Gm12331	predicted gene 12331 Pseudogene [Source:MGI Symbol;Acc:MGI:3650004]
ENSMUST00000026254	lower	2.7471e-10	3.86436e-16	Gbf1	golgi-specific brefeldin A-resistance factor 1 Gene [Source:MGI Symbol;Acc:MGI:1861607]
ENSMUST00000120203	lower	8.48621e-10	4.29084e-16	Gm12933	predicted gene 12933 Pseudogene [Source:MGI Symbol;Acc:MGI:3651147]
ENSMUST00000121722	lower	3.12243e-07	5.58017e-16	Gm12366	predicted gene 12366 Pseudogene [Source:MGI Symbol;Acc:MGI:3649557]
ENSMUST00000121058	higher	1.46584e-09	5.80836e-16	Hmgb1-ps5	high mobility group box 1, pseudogene 5 Pseudogene [Source:MGI Symbol;Acc:MGI:3776505]
ENSMUST00000046571	higher	9.14949e-07	5.88001e-16	Odf2	outer dense fiber of sperm tails 2 Gene [Source:MGI Symbol;Acc:MGI:1098824]
ENSMUST00000113756	higher	9.14949e-07	5.88001e-16	Odf2	outer dense fiber of sperm tails 2 Gene [Source:MGI Symbol;Acc:MGI:1098824]
ENSMUST00000069673	higher	2.17252e-05	5.99246e-16	Gpatch8	G patch domain containing 8 Gene [Source:MGI Symbol;Acc:MGI:1918667]
ENSMUST00000076364	lower	1.20894e-08	6.37002e-16	Rpl10-ps3	ribosomal protein L20, pseudogene 3 Pseudogene [Source:MGI Symbol;Acc:MGI:3704336]
ENSMUST00000099645	lower	1.20894e-08	6.37002e-16	NA	NA
ENSMUST00000119438	lower	1.20894e-08	6.37002e-16	Rpl10-ps1	ribosomal protein L20, pseudogene 1 Pseudogene [Source:MGI Symbol;Acc:MGI:3650909]
ENSMUST00000117071	lower	1.28634e-08	6.77784e-16	Gm11249	predicted gene 11249 Pseudogene [Source:MGI Symbol;Acc:MGI:3650834]
ENSMUST00000015877	higher	3.96022e-08	1.05131e-15	Capza2	capping protein (actin filament) muscle Z-line, alpha 2 Gene [Source:MGI Symbol;Acc:MGI:106222]
ENSMUST00000097774	higher	8.65826e-07	1.09546e-15	Camta1	calmodulin binding transcription activator 1 Gene [Source:MGI Symbol;Acc:MGI:2140230]
ENSMUST00000050143	higher	6.03909e-10	1.2531e-15	Gm7729	predicted gene 7729 Pseudogene [Source:MGI Symbol;Acc:MGI:3647361]
ENSMUST00000028377	lower	3.75246e-07	1.30746e-15	Scn2a1	sodium channel, voltage-gated, type II, alpha 1 Gene [Source:MGI Symbol;Acc:MGI:98248]
ENSMUST00000048188	higher	2.31778e-06	1.38397e-15	Phf20l1	PHD finger protein 20-like 1 Gene [Source:MGI Symbol;Acc:MGI:2444412]
ENSMUST00000110617	higher	0.00602473	1.63188e-15	2410089E03Rik	RIKEN cDNA 2410089E03 gene Gene [Source:MGI Symbol;Acc:MGI:1920942]
ENSMUST00000043870	lower	7.60226e-08	1.82913e-15	Polr2l	polymerase (RNA) II (DNA directed) polypeptide L Gene [Source:MGI Symbol;Acc:MGI:1913741]
ENSMUST00000033801	lower	1.78111e-10	2.02111e-15	Plp1	proteolipid protein (myelin) 1 Gene [Source:MGI Symbol;Acc:MGI:97623]
ENSMUST00000076842	lower	2.14638e-09	2.30469e-15	Gm6139	predicted gene 6139 Gene [Source:MGI Symbol;Acc:MGI:3643279]
ENSMUST00000040649	higher	5.1155e-09	4.8314e-15	Gm10052	predicted pseudogene 10052 Pseudogene [Source:MGI Symbol;Acc:MGI:3704348]
ENSMUST00000100067	lower	1.44083e-07	7.59186e-15	Scn2a1	sodium channel, voltage-gated, type II, alpha 1 Gene [Source:MGI Symbol;Acc:MGI:98248]
ENSMUST00000106535	higher	1.04798e-06	8.54144e-15	Rnpc3	RNA-binding region (RNP1, RRM) containing 3 Gene [Source:MGI Symbol;Acc:MGI:1914475]
ENSMUST00000073080	lower	1.63599e-07	8.62016e-15	Gm10053	predicted gene 10053 Gene [Source:MGI Symbol;Acc:MGI:3704493]
ENSMUST00000018711	lower	1.97449e-06	8.64185e-15	Gabarap	gamma-aminobutyric acid receptor associated protein Gene [Source:MGI Symbol;Acc:MGI:1861742]
ENSMUST00000074846	lower	1.97449e-06	8.64185e-15	Hsph1	heat shock 105kDa/110kDa protein 1 Gene [Source:MGI Symbol;Acc:MGI:105053]
ENSMUST00000046977	higher	9.65472e-10	1.33917e-14	Eltd1	EGF, latrophilin seven transmembrane domain containing 1 Gene [Source:MGI Symbol;Acc:MGI:2655562]
ENSMUST00000020372	lower	9.91163e-07	1.50279e-14	Uqcr11	ubiquinol-cytochrome c reductase, complex III subunit XI Gene [Source:MGI Symbol;Acc:MGI:1913844]
ENSMUST00000025327	lower	7.92234e-08	1.56319e-14	NA	NA
ENSMUST00000121321	lower	7.15151e-08	1.56379e-14	Gm4167	predicted gene 4167 Pseudogene [Source:MGI Symbol;Acc:MGI:3782343]
ENSMUST00000023005	higher	4.18262e-05	1.68284e-14	NA	NA
ENSMUST00000114717	higher	8.15317e-09	1.70557e-14	NA	NA
ENSMUST00000049790	higher	0.000393718	1.71686e-14	Camta1	calmodulin binding transcription activator 1 Gene [Source:MGI Symbol;Acc:MGI:2140230]
ENSMUST00000030013	higher	9.14949e-07	1.76751e-14	Xpa	xeroderma pigmentosum, complementation group A Gene [Source:MGI Symbol;Acc:MGI:99135]
ENSMUST00000107748	higher	9.14949e-07	1.76751e-14	Ppp1r9b	protein phosphatase 1, regulatory subunit 9B Gene [Source:MGI Symbol;Acc:MGI:2387581]
ENSMUST00000118281	higher	3.33642e-08	1.77933e-14	Hmgb1-ps4	high mobility group box 1, pseudogene 4 Pseudogene [Source:MGI Symbol;Acc:MGI:3768540]
ENSMUST00000117295	lower	2.62054e-08	2.20526e-14	Rps2-ps13	ribosomal protein S2, pseudogene 13 Pseudogene [Source:MGI Symbol;Acc:MGI:3705640]
ENSMUST00000118674	lower	2.45385e-08	2.68037e-14	Gm13015	predicted gene 13015 Pseudogene [Source:MGI Symbol;Acc:MGI:3651767]
ENSMUST00000079724	lower	5.38099e-10	2.71549e-14	Hax1	HCLS1 associated X-1 Gene [Source:MGI Symbol;Acc:MGI:1346319]
ENSMUST00000080358	lower	3.07738e-08	3.30435e-14	Gm10120	predicted gene 10120 Gene [Source:MGI Symbol;Acc:MGI:3641745]
ENSMUST00000115201	lower	3.00065e-07	6.2708e-14	Dlg1	discs, large homolog 1 (Drosophila) Gene [Source:MGI Symbol;Acc:MGI:107231]
ENSMUST00000008826	lower	1.63599e-07	8.27196e-14	Rpl10	ribosomal protein 10 Gene [Source:MGI Symbol;Acc:MGI:105943]
ENSMUST00000106134	lower	1.63599e-07	8.27196e-14	Ttll7	tubulin tyrosine ligase-like family, member 7 Gene [Source:MGI Symbol;Acc:MGI:1918142]
ENSMUST00000106537	lower	0.000158549	8.49792e-14	Atp5h	ATP synthase, H+ transporting, mitochondrial F0 complex, subunit d Gene [Source:MGI Symbol;Acc:MGI:1918929]
ENSMUST00000090569	lower	3.62125e-09	9.3372e-14	Psma5	proteasome (prosome, macropain) subunit, alpha type 5 Gene [Source:MGI Symbol;Acc:MGI:1347009]
ENSMUST00000091882	lower	4.81844e-07	9.50746e-14	Rps2-ps10	ribosomal protein S2, speudogene 10 Pseudogene [Source:MGI Symbol;Acc:MGI:3645604]
ENSMUST00000078739	lower	1.87237e-06	9.86566e-14	Gm3226	predicted gene 3226 Pseudogene [Source:MGI Symbol;Acc:MGI:3804968]
ENSMUST00000117138	lower	4.66501e-08	1.06016e-13	Acyp1	acylphosphatase 1, erythrocyte (common) type Gene [Source:MGI Symbol;Acc:MGI:1913454]
ENSMUST00000113766	higher	2.73703e-06	1.07467e-13	Odf2	outer dense fiber of sperm tails 2 Gene [Source:MGI Symbol;Acc:MGI:1098824]
ENSMUST00000078246	lower	2.20885e-06	1.11226e-13	Gm10108	predicted pseudogene 10108 Pseudogene [Source:MGI Symbol;Acc:MGI:3642431]
ENSMUST00000106598	lower	5.10958e-09	1.1174e-13	Elavl4	ELAV (embryonic lethal, abnormal vision, Drosophila)-like 4 (Hu antigen D) Gene [Source:MGI Symbol;Acc:MGI:107427]
ENSMUST00000063886	higher	1.2635e-07	1.19333e-13	Acvr2a	activin receptor IIA Gene [Source:MGI Symbol;Acc:MGI:102806]
ENSMUST00000112783	higher	1.2635e-07	1.19333e-13	NA	NA
ENSMUST00000090380	lower	9.40227e-07	1.26659e-13	Lmbrd2	LMBR1 domain containing 2 Gene [Source:MGI Symbol;Acc:MGI:2444173]
ENSMUST00000117423	lower	6.59794e-07	1.44274e-13	Kif2a	kinesin family member 2A Gene [Source:MGI Symbol;Acc:MGI:108390]
ENSMUST00000119126	higher	1.16025e-06	1.67076e-13	Gm9078	predicted gene 9078 Pseudogene [Source:MGI Symbol;Acc:MGI:3644457]
ENSMUST00000121713	lower	7.60226e-08	1.87333e-13	Gm10420	predicted gene 10420 Pseudogene [Source:MGI Symbol;Acc:MGI:3704275]
ENSMUST00000073722	lower	2.34999e-11	1.94528e-13	Gm10073	predicted pseudogene 10073 Pseudogene [Source:MGI Symbol;Acc:MGI:3641908]
ENSMUST00000028607	lower	7.5931e-08	2.03581e-13	Caprin1	cell cycle associated protein 1 Gene [Source:MGI Symbol;Acc:MGI:1858234]
ENSMUST00000046513	lower	9.91163e-07	2.06717e-13	Phyhipl	phytanoyl-CoA hydroxylase interacting protein-like Gene [Source:MGI Symbol;Acc:MGI:1918161]
ENSMUST00000097222	higher	3.96022e-08	2.11263e-13	Gm10361	predicted gene 10361 Pseudogene [Source:MGI Symbol;Acc:MGI:3708670]
ENSMUST00000074085	lower	2.20885e-06	2.4572e-13	Rpl10	ribosomal protein 10 Gene [Source:MGI Symbol;Acc:MGI:105943]
ENSMUST00000078977	higher	1.52549e-08	2.54893e-13	Abi1	abl-interactor 1 Gene [Source:MGI Symbol;Acc:MGI:104913]
ENSMUST00000054072	higher	8.15317e-09	2.99147e-13	Zfp81	zinc finger protein 81 Gene [Source:MGI Symbol;Acc:MGI:1890752]
ENSMUST00000030920	higher	1.04798e-06	3.25798e-13	Rbm33	RNA binding motif protein 33 Gene [Source:MGI Symbol;Acc:MGI:1919670]
ENSMUST00000113764	higher	1.04798e-06	3.25798e-13	Odf2	outer dense fiber of sperm tails 2 Gene [Source:MGI Symbol;Acc:MGI:1098824]
ENSMUST00000120626	lower	2.26399e-06	3.57274e-13	Gm12922	predicted gene 12922 Pseudogene [Source:MGI Symbol;Acc:MGI:3651537]
ENSMUST00000113765	higher	9.14949e-07	4.0902e-13	Odf2	outer dense fiber of sperm tails 2 Gene [Source:MGI Symbol;Acc:MGI:1098824]
ENSMUST00000110499	lower	1.13636e-05	4.27186e-13	Hsph1	heat shock 105kDa/110kDa protein 1 Gene [Source:MGI Symbol;Acc:MGI:105053]
ENSMUST00000073790	lower	9.67527e-06	5.09798e-13	Gm6311	predicted gene 6311 Pseudogene [Source:MGI Symbol;Acc:MGI:3644735]
ENSMUST00000084861	higher	1.52549e-08	5.4022e-13	Gm13237	predicted gene 13237 Pseudogene [Source:MGI Symbol;Acc:MGI:3649924]
ENSMUST00000109333	lower	1.39672e-07	5.44151e-13	Mrps36	mitochondrial ribosomal protein S36 Gene [Source:MGI Symbol;Acc:MGI:1913378]
ENSMUST00000110692	lower	5.04784e-07	5.51383e-13	NA	NA
ENSMUST00000041045	lower	1.20894e-08	6.10088e-13	H2afz	H2A histone family, member Z Gene [Source:MGI Symbol;Acc:MGI:1888388]
ENSMUST00000111465	lower	3.29839e-06	6.5082e-13	Cmtm5	CKLF-like MARVEL transmembrane domain containing 5 Gene [Source:MGI Symbol;Acc:MGI:2447164]
ENSMUST00000093224	higher	0.000556873	7.04564e-13	Psme4	proteasome (prosome, macropain) activator subunit 4 Gene [Source:MGI Symbol;Acc:MGI:2143994]
ENSMUST00000027131	lower	6.0864e-07	7.17261e-13	Slc39a10	solute carrier family 39 (zinc transporter), member 10 Gene [Source:MGI Symbol;Acc:MGI:1914515]
ENSMUST00000120130	lower	2.26399e-06	9.4938e-13	Atp5l2	ATP synthase, H+ transporting, mitochondrial FO complex, subunit G2, pseudogene Pseudogene [Source:MGI Symbol;Acc:MGI:3649364]
ENSMUST00000010752	higher	2.37843e-07	1.00318e-12	NA	NA
ENSMUST00000090257	lower	2.20885e-06	1.11685e-12	Gm8225	predicted gene 8225 Gene [Source:MGI Symbol;Acc:MGI:3643826]
ENSMUST00000071998	lower	1.24782e-05	1.68096e-12	NA	NA
ENSMUST00000099423	lower	1.24782e-05	1.68096e-12	Gm10774	predicted pseudogene 10774 Pseudogene [Source:MGI Symbol;Acc:MGI:3642325]
ENSMUST00000117405	lower	1.24782e-05	1.68096e-12	Gm15459	predicted gene 15459 Pseudogene [Source:MGI Symbol;Acc:MGI:3705702]
ENSMUST00000052615	higher	1.21705e-07	1.68814e-12	Gm9800	predicted gene 9800 Pseudogene [Source:MGI Symbol;Acc:MGI:3710580]
ENSMUST00000116452	higher	1.21705e-07	1.68814e-12	NA	NA
ENSMUST00000109862	lower	2.20885e-06	1.8588e-12	Eml1	echinoderm microtubule associated protein like 1 Gene [Source:MGI Symbol;Acc:MGI:1915769]
ENSMUST00000018547	higher	2.73703e-06	2.58502e-12	Ggnbp2	gametogenetin binding protein 2 Gene [Source:MGI Symbol;Acc:MGI:2387356]
ENSMUST00000034415	higher	2.73703e-06	2.58502e-12	Taf1d	TATA box binding protein (Tbp)-associated factor, RNA polymerase I, D Gene [Source:MGI Symbol;Acc:MGI:1922566]
ENSMUST00000120015	higher	2.73703e-06	2.58502e-12	Gm6461	predicted gene 6461 Pseudogene [Source:MGI Symbol;Acc:MGI:3643881]
ENSMUST00000048155	higher	2.23141e-09	2.64931e-12	Rbm25	RNA binding motif protein 25 Gene [Source:MGI Symbol;Acc:MGI:1914289]
ENSMUST00000077577	lower	3.47909e-07	2.96362e-12	Tuba1b	tubulin, alpha 1B Gene [Source:MGI Symbol;Acc:MGI:107804]
ENSMUST00000032573	higher	8.37075e-07	3.09082e-12	Pglyrp1	peptidoglycan recognition protein 1 Gene [Source:MGI Symbol;Acc:MGI:1345092]
ENSMUST00000084759	higher	8.37075e-07	3.09082e-12	Gm10156	predicted gene 10156 Pseudogene [Source:MGI Symbol;Acc:MGI:3642344]
ENSMUST00000105365	higher	8.37075e-07	3.09082e-12	Cirbp	cold inducible RNA binding protein Gene [Source:MGI Symbol;Acc:MGI:893588]
ENSMUST00000027127	higher	1.21705e-07	3.21795e-12	Sf3b1	splicing factor 3b, subunit 1 Gene [Source:MGI Symbol;Acc:MGI:1932339]
ENSMUST00000044385	lower	2.45385e-08	3.25906e-12	Sgtb	small glutamine-rich tetratricopeptide repeat (TPR)-containing, beta Gene [Source:MGI Symbol;Acc:MGI:2444615]
ENSMUST00000112970	higher	7.43689e-06	3.3246e-12	NA	NA
ENSMUST00000112971	higher	7.43689e-06	3.3246e-12	Atg4a	autophagy-related 4A (yeast) Gene [Source:MGI Symbol;Acc:MGI:2147903]
ENSMUST00000114884	higher	1.82226e-07	3.34614e-12	Rbm33	RNA binding motif protein 33 Gene [Source:MGI Symbol;Acc:MGI:1919670]
ENSMUST00000002655	lower	3.02989e-07	3.43816e-12	1810046J19Rik	RIKEN cDNA 1810046J19 gene Gene [Source:MGI Symbol;Acc:MGI:1913678]
ENSMUST00000022518	lower	3.02989e-07	3.43816e-12	N6amt2	N-6 adenine-specific DNA methyltransferase 2 (putative) Gene [Source:MGI Symbol;Acc:MGI:1915293]
ENSMUST00000074110	lower	4.997e-06	3.71055e-12	Gm8355	predicted pseudogene 8355 Pseudogene [Source:MGI Symbol;Acc:MGI:3645191]
ENSMUST00000023829	higher	8.15317e-09	4.05015e-12	Cdkn1a	cyclin-dependent kinase inhibitor 1A (P21) Gene [Source:MGI Symbol;Acc:MGI:104556]
ENSMUST00000118431	lower	3.68329e-05	4.09742e-12	Gm13772	predicted gene 13772 Pseudogene [Source:MGI Symbol;Acc:MGI:3650155]
ENSMUST00000099651	higher	6.91378e-06	4.26825e-12	NA	NA
ENSMUST00000092244	lower	9.67527e-06	4.42874e-12	Gnptab	N-acetylglucosamine-1-phosphate transferase, alpha and beta subunits Gene [Source:MGI Symbol;Acc:MGI:3643902]
ENSMUST00000112334	lower	5.53147e-05	4.57425e-12	Reps2	RALBP1 associated Eps domain containing protein 2 Gene [Source:MGI Symbol;Acc:MGI:2663511]
ENSMUST00000095471	lower	4.3657e-06	4.7784e-12	Rps2-ps6	ribosomal protein S2, pseudogene 6 Pseudogene [Source:MGI Symbol;Acc:MGI:3644876]
ENSMUST00000027285	lower	4.997e-06	5.4583e-12	Unc50	unc-50 homolog (C. elegans) Gene [Source:MGI Symbol;Acc:MGI:1914637]
ENSMUST00000075630	lower	4.997e-06	5.4583e-12	Atp5g2	ATP synthase, H+ transporting, mitochondrial F0 complex, subunit C2 (subunit 9) Gene [Source:MGI Symbol;Acc:MGI:1915192]
ENSMUST00000052135	higher	1.84248e-05	5.55244e-12	Rbbp6	retinoblastoma binding protein 6 Gene [Source:MGI Symbol;Acc:MGI:894835]
ENSMUST00000071590	higher	1.84248e-05	5.55244e-12	Rbbp6	retinoblastoma binding protein 6 Gene [Source:MGI Symbol;Acc:MGI:894835]
ENSMUST00000106536	higher	1.90394e-05	5.91897e-12	Rnpc3	RNA-binding region (RNP1, RRM) containing 3 Gene [Source:MGI Symbol;Acc:MGI:1914475]
ENSMUST00000020234	higher	1.04798e-06	6.70916e-12	Timp3	tissue inhibitor of metalloproteinase 3 Gene [Source:MGI Symbol;Acc:MGI:98754]
ENSMUST00000117362	higher	1.04798e-06	6.70916e-12	Gm12568	predicted gene 12568 Pseudogene [Source:MGI Symbol;Acc:MGI:3652153]
ENSMUST00000034981	higher	0.000112678	8.04533e-12	Xrn1	5'-3' exoribonuclease 1 Gene [Source:MGI Symbol;Acc:MGI:891964]
ENSMUST00000009157	lower	1.97449e-06	8.88897e-12	Dynll1	dynein light chain LC8-type 1 Gene [Source:MGI Symbol;Acc:MGI:1861457]
ENSMUST00000075010	lower	1.97449e-06	8.88897e-12	l7Rn6	lethal, Chr 7, Rinchik 6 Gene [Source:MGI Symbol;Acc:MGI:96738]
ENSMUST00000033800	lower	7.92234e-08	1.11659e-11	Plp1	proteolipid protein (myelin) 1 Gene [Source:MGI Symbol;Acc:MGI:97623]
ENSMUST00000027606	lower	6.45956e-05	1.27456e-11	Rgs2	regulator of G-protein signaling 2 Gene [Source:MGI Symbol;Acc:MGI:1098271]
ENSMUST00000095472	lower	2.20885e-06	1.30698e-11	NA	NA
ENSMUST00000043898	lower	2.26399e-06	1.34096e-11	Psenen	presenilin enhancer 2 homolog (C. elegans) Gene [Source:MGI Symbol;Acc:MGI:1913590]
ENSMUST00000003575	higher	3.85344e-07	1.36462e-11	Tpm4	tropomyosin 4 Gene [Source:MGI Symbol;Acc:MGI:2449202]
ENSMUST00000091394	higher	1.0451e-06	1.37511e-11	Abi1	abl-interactor 1 Gene [Source:MGI Symbol;Acc:MGI:104913]
ENSMUST00000110505	higher	3.85344e-07	1.41386e-11	Hmgb1	high mobility group box 1 Gene [Source:MGI Symbol;Acc:MGI:96113]
ENSMUST00000098707	higher	9.65472e-10	1.61435e-11	NA	NA
ENSMUST00000108781	higher	1.21705e-07	1.64792e-11	NA	NA
ENSMUST00000118441	higher	1.21705e-07	1.64792e-11	Gm13160	predicted gene 13160 Pseudogene [Source:MGI Symbol;Acc:MGI:3649984]
ENSMUST00000038437	higher	6.50843e-06	1.6868e-11	BC031353	cDNA sequence BC031353 Gene [Source:MGI Symbol;Acc:MGI:2387648]
ENSMUST00000081746	higher	6.50843e-06	1.6868e-11	BC031353	cDNA sequence BC031353 Gene [Source:MGI Symbol;Acc:MGI:2387648]
ENSMUST00000085352	higher	6.50843e-06	1.6868e-11	Prpf39	PRP39 pre-mRNA processing factor 39 homolog (yeast) Gene [Source:MGI Symbol;Acc:MGI:104602]
ENSMUST00000118035	lower	2.14638e-09	1.88228e-11	Gm11942	predicted gene 11942 Pseudogene [Source:MGI Symbol;Acc:MGI:3650608]
ENSMUST00000104933	higher	9.24712e-08	2.10112e-11	Gm12355	predicted gene 12355 Gene [Source:MGI Symbol;Acc:MGI:3649769]
ENSMUST00000094296	lower	2.45385e-08	2.23964e-11	Hax1	HCLS1 associated X-1 Gene [Source:MGI Symbol;Acc:MGI:1346319]
ENSMUST00000001825	lower	3.29839e-06	2.30711e-11	Chordc1	cysteine and histidine-rich domain (CHORD)-containing, zinc-binding protein 1 Gene [Source:MGI Symbol;Acc:MGI:1914167]
ENSMUST00000075738	lower	3.29839e-06	2.30711e-11	Cox6b1	cytochrome c oxidase, subunit VIb polypeptide 1 Gene [Source:MGI Symbol;Acc:MGI:107460]
ENSMUST00000091848	lower	3.29839e-06	2.30711e-11	Akr1e1	aldo-keto reductase family 1, member E1 Gene [Source:MGI Symbol;Acc:MGI:1914758]
ENSMUST00000004389	lower	2.11901e-05	2.49718e-11	Grcc10	gene rich cluster, C10 gene Gene [Source:MGI Symbol;Acc:MGI:1315201]
ENSMUST00000070878	lower	2.11901e-05	2.49718e-11	Fkbp2	FK506 binding protein 2 Gene [Source:MGI Symbol;Acc:MGI:95542]
ENSMUST00000078918	lower	2.11901e-05	2.49718e-11	l7Rn6	lethal, Chr 7, Rinchik 6 Gene [Source:MGI Symbol;Acc:MGI:96738]
ENSMUST00000109494	lower	2.11901e-05	2.49718e-11	Homer1	homer homolog 1 (Drosophila) Gene [Source:MGI Symbol;Acc:MGI:1347345]
ENSMUST00000044051	lower	9.91163e-07	2.55566e-11	Timm8b	translocase of inner mitochondrial membrane 8 homolog b (yeast) Gene [Source:MGI Symbol;Acc:MGI:1353424]
ENSMUST00000012220	lower	6.0864e-07	2.59291e-11	Brms1l	breast cancer metastasis-suppressor 1-like Gene [Source:MGI Symbol;Acc:MGI:1196337]
ENSMUST00000114931	lower	6.0864e-07	2.59291e-11	Cuta	cutA divalent cation tolerance homolog (E. coli) Gene [Source:MGI Symbol;Acc:MGI:1914925]
ENSMUST00000108662	lower	9.40227e-07	2.66094e-11	Trappc1	trafficking protein particle complex 1 Gene [Source:MGI Symbol;Acc:MGI:1098727]
ENSMUST00000042181	lower	3.2005e-06	2.72631e-11	Kif2a	kinesin family member 2A Gene [Source:MGI Symbol;Acc:MGI:108390]
ENSMUST00000029414	higher	2.02181e-06	2.80438e-11	Ssr3	signal sequence receptor, gamma Gene [Source:MGI Symbol;Acc:MGI:1914687]
ENSMUST00000108314	higher	6.74861e-07	3.30041e-11	Supt6h	suppressor of Ty 6 homolog (S. cerevisiae) Gene [Source:MGI Symbol;Acc:MGI:107726]
ENSMUST00000118554	higher	8.15317e-09	3.35048e-11	Gm13167	predicted gene 13167 Pseudogene [Source:MGI Symbol;Acc:MGI:3650208]
ENSMUST00000089149	lower	4.3657e-06	3.71887e-11	NA	NA
ENSMUST00000115890	lower	4.3657e-06	3.71887e-11	NA	NA
ENSMUST00000121106	lower	4.3657e-06	3.71887e-11	Gm15432	predicted gene 15432 Pseudogene [Source:MGI Symbol;Acc:MGI:3801969]
ENSMUST00000036125	higher	2.75081e-06	3.81556e-11	Eif4h	eukaryotic translation initiation factor 4H Gene [Source:MGI Symbol;Acc:MGI:1341822]
ENSMUST00000052299	higher	2.75081e-06	3.81556e-11	NA	NA
ENSMUST00000058232	higher	4.06767e-05	3.84176e-11	Xpa	xeroderma pigmentosum, complementation group A Gene [Source:MGI Symbol;Acc:MGI:99135]
ENSMUST00000092154	higher	4.06767e-05	3.84176e-11	Rnpc3	RNA-binding region (RNP1, RRM) containing 3 Gene [Source:MGI Symbol;Acc:MGI:1914475]
ENSMUST00000107765	higher	4.06767e-05	3.84176e-11	NA	NA
ENSMUST00000113757	higher	4.06767e-05	3.84176e-11	Odf2	outer dense fiber of sperm tails 2 Gene [Source:MGI Symbol;Acc:MGI:1098824]
ENSMUST00000054148	higher	2.73703e-06	4.25946e-11	Gm9790	predicted gene 9790 Gene [Source:MGI Symbol;Acc:MGI:3704221]
ENSMUST00000032362	lower	3.02989e-07	4.40386e-11	Slco1c1	solute carrier organic anion transporter family, member 1c1 Gene [Source:MGI Symbol;Acc:MGI:1889679]
ENSMUST00000059042	lower	3.02989e-07	4.40386e-11	Gtf2i	general transcription factor II I Gene [Source:MGI Symbol;Acc:MGI:1202722]
ENSMUST00000071488	lower	3.02989e-07	4.40386e-11	Ints3	integrator complex subunit 3 Gene [Source:MGI Symbol;Acc:MGI:2140050]
ENSMUST00000050993	higher	2.17252e-05	4.50794e-11	Eif5	eukaryotic translation initiation factor 5 Gene [Source:MGI Symbol;Acc:MGI:95309]
ENSMUST00000033805	lower	6.45956e-05	4.79658e-11	Psmd10	proteasome (prosome, macropain) 26S subunit, non-ATPase, 10 Gene [Source:MGI Symbol;Acc:MGI:1858898]
ENSMUST00000059673	lower	6.45956e-05	4.79658e-11	Gm8203	predicted pseudogene 8203 Pseudogene [Source:MGI Symbol;Acc:MGI:3646499]
ENSMUST00000051310	lower	4.3657e-06	4.95398e-11	Ddhd1	DDHD domain containing 1 Gene [Source:MGI Symbol;Acc:MGI:2150302]
ENSMUST00000118911	lower	0.000105275	5.32297e-11	Gm11687	predicted gene 11687 Pseudogene [Source:MGI Symbol;Acc:MGI:3652085]
ENSMUST00000058265	lower	4.997e-06	5.67035e-11	C1galt1c1	C1GALT1-specific chaperone 1 Gene [Source:MGI Symbol;Acc:MGI:1913493]
ENSMUST00000101510	lower	4.997e-06	5.67035e-11	NA	NA
ENSMUST00000111261	lower	4.997e-06	5.67035e-11	Gtf2i	general transcription factor II I Gene [Source:MGI Symbol;Acc:MGI:1202722]
ENSMUST00000022204	lower	1.39634e-05	6.93218e-11	Kif2a	kinesin family member 2A Gene [Source:MGI Symbol;Acc:MGI:108390]
ENSMUST00000054556	lower	0.000353335	6.97181e-11	Taf10	TAF10 RNA polymerase II, TATA box binding protein (TBP)-associated factor Gene [Source:MGI Symbol;Acc:MGI:1346320]
ENSMUST00000021416	higher	8.37075e-07	7.24832e-11	Mbip	MAP3K12 binding inhibitory protein 1 Gene [Source:MGI Symbol;Acc:MGI:1918320]
ENSMUST00000018246	lower	0.000158549	8.01663e-11	Hist1h2bc	histone cluster 1, H2bc Gene [Source:MGI Symbol;Acc:MGI:1915274]
ENSMUST00000023312	lower	0.000158549	8.01663e-11	Alcam	activated leukocyte cell adhesion molecule Gene [Source:MGI Symbol;Acc:MGI:1313266]
ENSMUST00000077766	lower	0.000158549	8.01663e-11	Cycs	cytochrome c, somatic Gene [Source:MGI Symbol;Acc:MGI:88578]
ENSMUST00000008477	higher	2.17252e-05	8.02182e-11	Snrpb2	U2 small nuclear ribonucleoprotein B Gene [Source:MGI Symbol;Acc:MGI:104805]
ENSMUST00000020018	lower	1.5284e-07	8.45737e-11	Vta1	Vps20-associated 1 homolog (S. cerevisiae) Gene [Source:MGI Symbol;Acc:MGI:1913451]
ENSMUST00000106594	lower	1.5284e-07	8.45737e-11	NA	NA
ENSMUST00000101304	higher	1.31139e-05	8.48966e-11	Kdm3a	lysine (K)-specific demethylase 3A Gene [Source:MGI Symbol;Acc:MGI:98847]
ENSMUST00000075281	higher	0.00131427	8.52204e-11	Mark3	MAP/microtubule affinity-regulating kinase 3 Gene [Source:MGI Symbol;Acc:MGI:1341865]
ENSMUST00000106112	higher	0.000162082	1.00062e-10	Bnip3	BCL2/adenovirus E1B interacting protein 3 Gene [Source:MGI Symbol;Acc:MGI:109326]
ENSMUST00000025027	lower	0.000252043	1.05692e-10	Cuta	cutA divalent cation tolerance homolog (E. coli) Gene [Source:MGI Symbol;Acc:MGI:1914925]
ENSMUST00000056585	higher	4.18262e-05	1.06777e-10	Atg4a-ps	autophagy-related 4A (yeast), pseudogene Pseudogene [Source:MGI Symbol;Acc:MGI:3615624]
ENSMUST00000117271	higher	4.18262e-05	1.06777e-10	Atg4a-ps	autophagy-related 4A (yeast), pseudogene Pseudogene [Source:MGI Symbol;Acc:MGI:3615624]
ENSMUST00000000804	higher	0.000739775	1.12971e-10	Ddx3x	DEAD/H (Asp-Glu-Ala-Asp/His) box polypeptide 3, X-linked Gene [Source:MGI Symbol;Acc:MGI:103064]
ENSMUST00000045224	higher	1.90394e-05	1.21889e-10	Acer2	alkaline ceramidase 2 Gene [Source:MGI Symbol;Acc:MGI:1920932]
ENSMUST00000020929	lower	1.97449e-06	1.22016e-10	Amz2	archaelysin family metallopeptidase 2 Gene [Source:MGI Symbol;Acc:MGI:104837]
ENSMUST00000067024	lower	1.97449e-06	1.22016e-10	NA	NA
ENSMUST00000040402	lower	7.92234e-08	1.23086e-10	Ppp1r11	protein phosphatase 1, regulatory (inhibitor) subunit 11 Gene [Source:MGI Symbol;Acc:MGI:1923747]
ENSMUST00000015234	lower	3.00332e-05	1.35207e-10	Ptgds	prostaglandin D2 synthase (brain) Gene [Source:MGI Symbol;Acc:MGI:99261]
ENSMUST00000103224	higher	1.33273e-05	1.42782e-10	Trpm7	transient receptor potential cation channel, subfamily M, member 7 Gene [Source:MGI Symbol;Acc:MGI:1929996]
ENSMUST00000110401	higher	1.33273e-05	1.42782e-10	NA	NA
ENSMUST00000079601	lower	0.000699127	1.4581e-10	Etv5	ets variant gene 5 Gene [Source:MGI Symbol;Acc:MGI:1096867]
ENSMUST00000035045	lower	0.00109775	1.47879e-10	Mras	muscle and microspikes RAS Gene [Source:MGI Symbol;Acc:MGI:1100856]
ENSMUST00000111828	lower	6.45956e-05	1.59174e-10	Ddhd1	DDHD domain containing 1 Gene [Source:MGI Symbol;Acc:MGI:2150302]
ENSMUST00000029025	lower	5.04784e-07	1.66596e-10	Zdbf2	zinc finger, DBF-type containing 2 Gene [Source:MGI Symbol;Acc:MGI:1921134]
ENSMUST00000085368	lower	0.000158549	1.70243e-10	Gm5786	predicted pseudogene 5786 Pseudogene [Source:MGI Symbol;Acc:MGI:3645003]
ENSMUST00000098192	lower	0.000158549	1.73186e-10	Hbb-b2	hemoglobin, beta adult minor chain Gene [Source:MGI Symbol;Acc:MGI:96022]
ENSMUST00000107947	lower	0.000158549	1.73186e-10	NA	NA
ENSMUST00000111247	lower	0.000158549	1.73186e-10	Pea15a	phosphoprotein enriched in astrocytes 15A Gene [Source:MGI Symbol;Acc:MGI:104799]
ENSMUST00000047322	higher	7.22763e-05	1.8732e-10	Rbbp8	retinoblastoma binding protein 8 Gene [Source:MGI Symbol;Acc:MGI:2442995]
ENSMUST00000043931	lower	0.00169229	1.88257e-10	Atp5h	ATP synthase, H+ transporting, mitochondrial F0 complex, subunit d Gene [Source:MGI Symbol;Acc:MGI:1918929]
ENSMUST00000073791	lower	0.00169229	1.88257e-10	Atp5h	ATP synthase, H+ transporting, mitochondrial F0 complex, subunit d Gene [Source:MGI Symbol;Acc:MGI:1918929]
ENSMUST00000006367	higher	6.50843e-06	2.30483e-10	Htra1	HtrA serine peptidase 1 Gene [Source:MGI Symbol;Acc:MGI:1929076]
ENSMUST00000072503	lower	2.11901e-05	2.40454e-10	Rpl18	ribosomal protein L18 Gene [Source:MGI Symbol;Acc:MGI:98003]
ENSMUST00000122467	higher	0.000556873	2.48945e-10	Gm14373	predicted gene 14373 Pseudogene [Source:MGI Symbol;Acc:MGI:3651800]
ENSMUST00000088819	lower	9.67527e-06	2.49472e-10	Rps2-ps13	ribosomal protein S2, pseudogene 13 Pseudogene [Source:MGI Symbol;Acc:MGI:3705640]
ENSMUST00000031061	higher	0.0001233	2.57933e-10	Dhx15	DEAH (Asp-Glu-Ala-His) box polypeptide 15 Gene [Source:MGI Symbol;Acc:MGI:1099786]
ENSMUST00000099074	higher	5.47014e-05	2.70988e-10	NA	NA
ENSMUST00000117069	lower	4.26593e-07	2.72413e-10	Ppil3	peptidylprolyl isomerase (cyclophilin)-like 3 Gene [Source:MGI Symbol;Acc:MGI:1917475]
ENSMUST00000016396	lower	1.13636e-05	2.73705e-10	Atp5e	ATP synthase, H+ transporting, mitochondrial F1 complex, epsilon subunit Gene [Source:MGI Symbol;Acc:MGI:1855697]
ENSMUST00000110691	lower	1.13636e-05	2.73705e-10	Akr1e1	aldo-keto reductase family 1, member E1 Gene [Source:MGI Symbol;Acc:MGI:1914758]
ENSMUST00000000821	lower	9.40227e-07	2.8448e-10	Usp32	ubiquitin specific peptidase 32 Gene [Source:MGI Symbol;Acc:MGI:2144475]
ENSMUST00000087351	higher	8.37075e-07	2.9473e-10	Hnrnpa1	heterogeneous nuclear ribonucleoprotein A1 Gene [Source:MGI Symbol;Acc:MGI:104820]
ENSMUST00000113759	higher	2.30015e-05	3.19047e-10	Odf2	outer dense fiber of sperm tails 2 Gene [Source:MGI Symbol;Acc:MGI:1098824]
ENSMUST00000090337	higher	9.68166e-08	3.37404e-10	Asb14	ankyrin repeat and SOCS box-containing 14 Gene [Source:MGI Symbol;Acc:MGI:2655107]
ENSMUST00000080127	lower	1.24782e-05	3.53147e-10	Homer1	homer homolog 1 (Drosophila) Gene [Source:MGI Symbol;Acc:MGI:1347345]
ENSMUST00000114582	higher	1.84248e-05	3.67841e-10	Hmgb3	high mobility group box 3 Gene [Source:MGI Symbol;Acc:MGI:1098219]
ENSMUST00000115207	lower	2.26399e-06	3.78086e-10	Dlg1	discs, large homolog 1 (Drosophila) Gene [Source:MGI Symbol;Acc:MGI:107231]
ENSMUST00000007800	lower	6.45956e-05	4.51823e-10	Arpp19	cAMP-regulated phosphoprotein 19 Gene [Source:MGI Symbol;Acc:MGI:1891691]
ENSMUST00000022781	lower	6.45956e-05	4.51823e-10	Dad1	defender against cell death 1 Gene [Source:MGI Symbol;Acc:MGI:101912]
ENSMUST00000029078	lower	6.45956e-05	4.51823e-10	Car2	carbonic anhydrase 2 Gene [Source:MGI Symbol;Acc:MGI:88269]
ENSMUST00000051698	lower	6.45956e-05	4.51823e-10	Ly6e	lymphocyte antigen 6 complex, locus E Gene [Source:MGI Symbol;Acc:MGI:106651]
ENSMUST00000095128	lower	6.45956e-05	4.51823e-10	Ndufb6	NADH dehydrogenase (ubiquinone) 1 beta subcomplex, 6 Gene [Source:MGI Symbol;Acc:MGI:2684983]
ENSMUST00000078747	lower	0.000386947	4.56003e-10	4921513D23Rik	RIKEN cDNA 4921513D23 gene Gene [Source:MGI Symbol;Acc:MGI:2444505]
ENSMUST00000055262	lower	3.29839e-06	4.64884e-10	Vti1b	vesicle transport through interaction with t-SNAREs 1B homolog Gene [Source:MGI Symbol;Acc:MGI:1855688]
ENSMUST00000021880	higher	1.27959e-05	4.69494e-10	Ctla2a	cytotoxic T lymphocyte-associated protein 2 alpha Gene [Source:MGI Symbol;Acc:MGI:88554]
ENSMUST00000030787	lower	0.000641874	4.76626e-10	Rheb	Ras homolog enriched in brain Gene [Source:MGI Symbol;Acc:MGI:97912]
ENSMUST00000075872	higher	0.00112454	5.02714e-10	Mysm1	myb-like, SWIRM and MPN domains 1 Gene [Source:MGI Symbol;Acc:MGI:2444584]
ENSMUST00000035950	higher	2.73703e-06	5.25123e-10	NA	NA
ENSMUST00000058470	higher	2.73703e-06	5.25123e-10	Polr2a	polymerase (RNA) II (DNA directed) polypeptide A Gene [Source:MGI Symbol;Acc:MGI:98086]
ENSMUST00000085491	lower	0.0029839	5.88765e-10	Gm6822	predicted pseudogene 6822 Pseudogene [Source:MGI Symbol;Acc:MGI:3644721]
ENSMUST00000077609	higher	2.75081e-06	6.25038e-10	Fus	fusion, derived from t(12;16) malignant liposarcoma (human) Gene [Source:MGI Symbol;Acc:MGI:1353633]
ENSMUST00000095944	higher	2.75081e-06	6.25038e-10	Zfp777	zinc finger protein 777 Gene [Source:MGI Symbol;Acc:MGI:1919556]
ENSMUST00000113762	higher	4.06767e-05	6.33025e-10	Odf2	outer dense fiber of sperm tails 2 Gene [Source:MGI Symbol;Acc:MGI:1098824]
ENSMUST00000112629	lower	4.997e-06	6.63674e-10	Nr4a2	nuclear receptor subfamily 4, group A, member 2 Gene [Source:MGI Symbol;Acc:MGI:1352456]
ENSMUST00000084953	higher	0.00229894	7.14696e-10	Mark3	MAP/microtubule affinity-regulating kinase 3 Gene [Source:MGI Symbol;Acc:MGI:1341865]
ENSMUST00000059410	higher	0.0111388	7.22267e-10	5830418K08Rik	RIKEN cDNA 5830418K08 gene Gene [Source:MGI Symbol;Acc:MGI:2442521]
ENSMUST00000111047	lower	6.45956e-05	7.32999e-10	Bdnf	brain derived neurotrophic factor Gene [Source:MGI Symbol;Acc:MGI:88145]
ENSMUST00000111050	lower	6.45956e-05	7.32999e-10	Bdnf	brain derived neurotrophic factor Gene [Source:MGI Symbol;Acc:MGI:88145]
ENSMUST00000025918	lower	0.0018023	7.55774e-10	Stip1	stress-induced phosphoprotein 1 Gene [Source:MGI Symbol;Acc:MGI:109130]
ENSMUST00000041994	higher	5.47014e-05	7.58746e-10	Tet2	tet oncogene family member 2 Gene [Source:MGI Symbol;Acc:MGI:2443298]
ENSMUST00000023454	lower	3.55941e-05	8.57324e-10	Dlg1	discs, large homolog 1 (Drosophila) Gene [Source:MGI Symbol;Acc:MGI:107231]
ENSMUST00000034529	lower	9.12469e-07	8.63314e-10	Cul5	cullin 5 Gene [Source:MGI Symbol;Acc:MGI:1922967]
ENSMUST00000046018	lower	2.11901e-05	9.02733e-10	NA	NA
ENSMUST00000098308	lower	2.11901e-05	9.02733e-10	Dlg2	discs, large homolog 2 (Drosophila) Gene [Source:MGI Symbol;Acc:MGI:1344351]
ENSMUST00000105367	lower	2.11901e-05	9.02733e-10	Atp5d	ATP synthase, H+ transporting, mitochondrial F1 complex, delta subunit Gene [Source:MGI Symbol;Acc:MGI:1913293]
ENSMUST00000085496	higher	3.55679e-06	9.0325e-10	Gm5518	predicted gene 5518 Pseudogene [Source:MGI Symbol;Acc:MGI:3648673]
ENSMUST00000094854	lower	0.000158549	9.38136e-10	Gm13015	predicted gene 13015 Pseudogene [Source:MGI Symbol;Acc:MGI:3651767]
ENSMUST00000108344	lower	0.000158549	9.38136e-10	Akt2	thymoma viral proto-oncogene 2 Gene [Source:MGI Symbol;Acc:MGI:104874]
ENSMUST00000099356	higher	1.31139e-05	9.39742e-10	Arrdc3	arrestin domain containing 3 Gene [Source:MGI Symbol;Acc:MGI:2145242]
ENSMUST00000113763	higher	1.31139e-05	9.39742e-10	Odf2	outer dense fiber of sperm tails 2 Gene [Source:MGI Symbol;Acc:MGI:1098824]
ENSMUST00000041264	higher	0.000383124	9.7807e-10	B230315N10Rik	RIKEN cDNA B230315N10 gene Gene [Source:MGI Symbol;Acc:MGI:3621440]
ENSMUST00000090940	lower	7.92234e-08	1.01792e-09	Ermn	ermin, ERM-like protein Gene [Source:MGI Symbol;Acc:MGI:1925017]
ENSMUST00000038522	lower	2.11901e-05	1.06935e-09	Slmap	sarcolemma associated protein Gene [Source:MGI Symbol;Acc:MGI:1933549]
ENSMUST00000102956	lower	2.11901e-05	1.06935e-09	Slmap	sarcolemma associated protein Gene [Source:MGI Symbol;Acc:MGI:1933549]
ENSMUST00000075080	lower	4.3657e-06	1.18404e-09	Fam19a1	family with sequence similarity 19, member A1 Gene [Source:MGI Symbol;Acc:MGI:2443695]
ENSMUST00000070435	lower	2.26399e-06	1.25277e-09	Fabp3-ps1	fatty acid binding protein 3, muscle and heart, pseudogene 1 Pseudogene [Source:MGI Symbol;Acc:MGI:101929]
ENSMUST00000076465	lower	6.45956e-05	1.41262e-09	Gm5621	predicted gene 5621 Pseudogene [Source:MGI Symbol;Acc:MGI:3646701]
ENSMUST00000092431	lower	0.000365904	1.42553e-09	Ank3	ankyrin 3, epithelial Gene [Source:MGI Symbol;Acc:MGI:88026]
ENSMUST00000118634	lower	0.000365904	1.42553e-09	Gm6433	predicted gene 6433 Pseudogene [Source:MGI Symbol;Acc:MGI:3645394]
ENSMUST00000114348	lower	9.91163e-07	1.46949e-09	Ppil3	peptidylprolyl isomerase (cyclophilin)-like 3 Gene [Source:MGI Symbol;Acc:MGI:1917475]
ENSMUST00000004076	lower	0.000252043	1.49285e-09	Grm3	glutamate receptor, metabotropic 3 Gene [Source:MGI Symbol;Acc:MGI:1351340]
ENSMUST00000061311	lower	5.04784e-07	1.56788e-09	Mrps36-ps1	mitichondrial ribosomal protein S36, pseudogene 1 Pseudogene [Source:MGI Symbol;Acc:MGI:3809201]
ENSMUST00000107124	lower	5.04784e-07	1.56788e-09	Elavl2	ELAV (embryonic lethal, abnormal vision, Drosophila)-like 2 (Hu antigen B) Gene [Source:MGI Symbol;Acc:MGI:1100887]
ENSMUST00000101102	lower	0.000353335	1.59068e-09	Reps2	RALBP1 associated Eps domain containing protein 2 Gene [Source:MGI Symbol;Acc:MGI:2663511]
ENSMUST00000054167	lower	0.00450662	1.63932e-09	Ank3	ankyrin 3, epithelial Gene [Source:MGI Symbol;Acc:MGI:88026]
ENSMUST00000020482	higher	1.90394e-05	1.64864e-09	NA	NA
ENSMUST00000092123	higher	1.90394e-05	1.64864e-09	Epc2	enhancer of polycomb homolog 2 (Drosophila) Gene [Source:MGI Symbol;Acc:MGI:1278321]
ENSMUST00000109820	higher	1.90394e-05	1.64864e-09	Bcl2l1	BCL2-like 1 Gene [Source:MGI Symbol;Acc:MGI:88139]
ENSMUST00000037814	lower	3.00681e-05	1.76219e-09	Cmtm5	CKLF-like MARVEL transmembrane domain containing 5 Gene [Source:MGI Symbol;Acc:MGI:2447164]
ENSMUST00000102752	lower	3.00332e-05	1.85594e-09	Homer1	homer homolog 1 (Drosophila) Gene [Source:MGI Symbol;Acc:MGI:1347345]
ENSMUST00000102602	lower	0.00169933	1.85621e-09	Trappc1	trafficking protein particle complex 1 Gene [Source:MGI Symbol;Acc:MGI:1098727]
ENSMUST00000118533	higher	0.000739775	1.91728e-09	Gm15772	predicted gene 15772 Pseudogene [Source:MGI Symbol;Acc:MGI:3805541]
ENSMUST00000085569	lower	9.40227e-07	2.08818e-09	NA	NA
ENSMUST00000069965	higher	2.02181e-06	2.1881e-09	Cdk17	cyclin-dependent kinase 17 Gene [Source:MGI Symbol;Acc:MGI:97517]
ENSMUST00000028128	higher	6.50843e-06	2.34653e-09	Odf2	outer dense fiber of sperm tails 2 Gene [Source:MGI Symbol;Acc:MGI:1098824]
ENSMUST00000114242	higher	2.92146e-07	2.51006e-09	Brd2	bromodomain containing 2 Gene [Source:MGI Symbol;Acc:MGI:99495]
ENSMUST00000103194	lower	9.80318e-05	2.5277e-09	Car4	carbonic anhydrase 4 Gene [Source:MGI Symbol;Acc:MGI:1096574]
ENSMUST00000086041	higher	7.22763e-05	2.55952e-09	Clasrp	CLK4-associating serine/arginine rich protein Gene [Source:MGI Symbol;Acc:MGI:1855695]
ENSMUST00000015800	lower	0.0112408	2.57184e-09	Hspa8	heat shock protein 8 Gene [Source:MGI Symbol;Acc:MGI:105384]
ENSMUST00000028166	lower	1.13636e-05	2.71162e-09	Nr4a2	nuclear receptor subfamily 4, group A, member 2 Gene [Source:MGI Symbol;Acc:MGI:1352456]
ENSMUST00000096495	lower	1.13636e-05	2.71162e-09	Med14	mediator complex subunit 14 Gene [Source:MGI Symbol;Acc:MGI:1349442]
ENSMUST00000029780	higher	0.00131427	2.74933e-09	Ptbp2	polypyrimidine tract binding protein 2 Gene [Source:MGI Symbol;Acc:MGI:1860489]
ENSMUST00000036211	lower	1.5284e-07	2.8991e-09	Gpr12	G-protein coupled receptor 12 Gene [Source:MGI Symbol;Acc:MGI:101909]
ENSMUST00000100206	higher	0.000170382	3.12866e-09	Larp4	La ribonucleoprotein domain family, member 4 Gene [Source:MGI Symbol;Acc:MGI:2443114]
ENSMUST00000065509	higher	0.000226507	3.14181e-09	Kdm3a	lysine (K)-specific demethylase 3A Gene [Source:MGI Symbol;Acc:MGI:98847]
ENSMUST00000114845	higher	0.000226507	3.14181e-09	Pfkfb3	6-phosphofructo-2-kinase/fructose-2,6-biphosphatase 3 Gene [Source:MGI Symbol;Acc:MGI:2181202]
ENSMUST00000093171	higher	1.16025e-06	3.17386e-09	Abi1	abl-interactor 1 Gene [Source:MGI Symbol;Acc:MGI:104913]
ENSMUST00000042898	lower	0.000641874	3.18661e-09	Gstp1	glutathione S-transferase, pi 1 Gene [Source:MGI Symbol;Acc:MGI:95865]
ENSMUST00000050631	lower	0.000641874	3.18661e-09	Cyb5r4	cytochrome b5 reductase 4 Gene [Source:MGI Symbol;Acc:MGI:2386848]
ENSMUST00000031352	lower	0.000527429	3.45336e-09	G3bp2	GTPase activating protein (SH3 domain) binding protein 2 Gene [Source:MGI Symbol;Acc:MGI:2442040]
ENSMUST00000022206	lower	1.13636e-05	3.75038e-09	Ndufaf2	NADH dehydrogenase (ubiquinone) 1 alpha subcomplex, assembly factor 2 Gene [Source:MGI Symbol;Acc:MGI:1922847]
ENSMUST00000037499	lower	1.13636e-05	3.75038e-09	Immp1l	IMP1 inner mitochondrial membrane peptidase-like (S. cerevisiae) Gene [Source:MGI Symbol;Acc:MGI:1913791]
ENSMUST00000111260	lower	1.24782e-05	3.77549e-09	Gtf2i	general transcription factor II I Gene [Source:MGI Symbol;Acc:MGI:1202722]
ENSMUST00000112346	lower	1.24782e-05	3.77549e-09	B3galt1	UDP-Gal:betaGlcNAc beta 1,3-galactosyltransferase, polypeptide 1 Gene [Source:MGI Symbol;Acc:MGI:1349403]
ENSMUST00000077911	lower	0.000158549	3.81883e-09	NA	NA
ENSMUST00000112330	lower	0.000138793	3.92798e-09	Slmap	sarcolemma associated protein Gene [Source:MGI Symbol;Acc:MGI:1933549]
ENSMUST00000027195	higher	0.00756964	3.95818e-09	NA	NA
ENSMUST00000100001	lower	8.19483e-06	4.18165e-09	Dlg1	discs, large homolog 1 (Drosophila) Gene [Source:MGI Symbol;Acc:MGI:107231]
ENSMUST00000036418	higher	0.000162082	4.28554e-09	Gm129	predicted gene 129 Gene [Source:MGI Symbol;Acc:MGI:2684975]
ENSMUST00000120168	higher	0.000162082	4.28554e-09	Gm13902	predicted gene 13902 Pseudogene [Source:MGI Symbol;Acc:MGI:3652326]
ENSMUST00000019861	higher	0.0001233	4.524e-09	Zfp451	zinc finger protein 451 Gene [Source:MGI Symbol;Acc:MGI:2137896]
ENSMUST00000034131	lower	4.997e-06	4.5608e-09	Vps35	vacuolar protein sorting 35 Gene [Source:MGI Symbol;Acc:MGI:1890467]
ENSMUST00000112598	lower	0.0484381	4.72556e-09	Rpl15	ribosomal protein L15 Gene [Source:MGI Symbol;Acc:MGI:1913730]
ENSMUST00000070501	lower	3.29839e-06	5.12458e-09	NA	NA
ENSMUST00000081542	lower	3.29839e-06	5.12458e-09	Kcnd2	potassium voltage-gated channel, Shal-related family, member 2 Gene [Source:MGI Symbol;Acc:MGI:102663]
ENSMUST00000106603	lower	3.29839e-06	5.12458e-09	Elavl4	ELAV (embryonic lethal, abnormal vision, Drosophila)-like 4 (Hu antigen D) Gene [Source:MGI Symbol;Acc:MGI:107427]
ENSMUST00000026015	higher	1.21705e-07	5.21044e-09	NA	NA
ENSMUST00000121920	lower	0.000853056	5.96681e-09	Mrpl24	mitochondrial ribosomal protein L24 Gene [Source:MGI Symbol;Acc:MGI:1914957]
ENSMUST00000072699	higher	1.19249e-05	6.47044e-09	Hmgb3	high mobility group box 3 Gene [Source:MGI Symbol;Acc:MGI:1098219]
ENSMUST00000029542	lower	4.997e-06	6.60677e-09	Ints3	integrator complex subunit 3 Gene [Source:MGI Symbol;Acc:MGI:2140050]
ENSMUST00000042296	lower	4.997e-06	6.60677e-09	Qk	quaking Gene [Source:MGI Symbol;Acc:MGI:97837]
ENSMUST00000073466	lower	4.997e-06	6.60677e-09	Cryzl1	crystallin, zeta (quinone reductase)-like 1 Gene [Source:MGI Symbol;Acc:MGI:1913859]
ENSMUST00000073014	higher	0.000433606	6.74793e-09	Gm8991	predicted pseudogene 8991 Pseudogene [Source:MGI Symbol;Acc:MGI:3644227]
ENSMUST00000075181	higher	0.000433606	6.74793e-09	Plekha1	pleckstrin homology domain containing, family A (phosphoinositide binding specific) member 1 Gene [Source:MGI Symbol;Acc:MGI:2442213]
ENSMUST00000021958	lower	0.000641874	7.28367e-09	Pcbd2	pterin 4 alpha carbinolamine dehydratase/dimerization cofactor of hepatocyte nuclear factor 1 alpha (TCF1) 2 Gene [Source:MGI Symbol;Acc:MGI:1919812]
ENSMUST00000064762	lower	0.000641874	7.28367e-09	Mtap1b	microtubule-associated protein 1B Gene [Source:MGI Symbol;Acc:MGI:1306778]
ENSMUST00000110951	lower	0.000641874	7.28367e-09	Cops6	COP9 (constitutive photomorphogenic) homolog, subunit 6 (Arabidopsis thaliana) Gene [Source:MGI Symbol;Acc:MGI:1349439]
ENSMUST00000118830	lower	0.000641874	7.28367e-09	Vps29	vacuolar protein sorting 29 (S. pombe) Gene [Source:MGI Symbol;Acc:MGI:1928344]
ENSMUST00000121866	lower	0.000641874	7.28367e-09	Gm13007	predicted gene 13007 Pseudogene [Source:MGI Symbol;Acc:MGI:3649722]
ENSMUST00000064477	lower	1.13636e-05	7.56332e-09	Dlg1	discs, large homolog 1 (Drosophila) Gene [Source:MGI Symbol;Acc:MGI:107231]
ENSMUST00000118522	higher	4.06767e-05	7.80418e-09	Gcfc1	GC-rich sequence DNA-binding factor 1 Gene [Source:MGI Symbol;Acc:MGI:1914617]
ENSMUST00000082024	lower	2.26399e-06	8.12697e-09	Mpp5	membrane protein, palmitoylated 5 (MAGUK p55 subfamily member 5) Gene [Source:MGI Symbol;Acc:MGI:1927339]
ENSMUST00000015361	higher	0.00078179	8.37574e-09	Hmgb3	high mobility group box 3 Gene [Source:MGI Symbol;Acc:MGI:1098219]
ENSMUST00000119715	higher	3.67303e-05	8.53293e-09	Gm5937	predicted gene 5937 Pseudogene [Source:MGI Symbol;Acc:MGI:3648844]
ENSMUST00000079419	lower	0.000552518	8.7102e-09	Rpl15	ribosomal protein L15 Gene [Source:MGI Symbol;Acc:MGI:1913730]
ENSMUST00000029654	lower	6.45956e-05	9.10427e-09	Glrb	glycine receptor, beta subunit Gene [Source:MGI Symbol;Acc:MGI:95751]
ENSMUST00000056136	lower	6.45956e-05	9.3888e-09	Kcnj10	potassium inwardly-rectifying channel, subfamily J, member 10 Gene [Source:MGI Symbol;Acc:MGI:1194504]
ENSMUST00000079086	lower	6.45956e-05	9.3888e-09	Homer1	homer homolog 1 (Drosophila) Gene [Source:MGI Symbol;Acc:MGI:1347345]
ENSMUST00000038834	higher	0.000739775	1.02612e-08	Zfp101	zinc finger protein 101 Gene [Source:MGI Symbol;Acc:MGI:107547]
ENSMUST00000106198	higher	0.000739775	1.02612e-08	NA	NA
ENSMUST00000118558	higher	0.000739775	1.02612e-08	Ndufa5	NADH dehydrogenase (ubiquinone) 1 alpha subcomplex, 5 Gene [Source:MGI Symbol;Acc:MGI:1915452]
ENSMUST00000094545	higher	0.000383124	1.02724e-08	Hfm1	HFM1, ATP-dependent DNA helicase homolog (S. cerevisiae) Gene [Source:MGI Symbol;Acc:MGI:3036246]
ENSMUST00000085133	lower	1.97449e-06	1.03538e-08	Atp2c1	ATPase, Ca++-sequestering Gene [Source:MGI Symbol;Acc:MGI:1889008]
ENSMUST00000119653	lower	1.97449e-06	1.03538e-08	Gm16148	predicted gene 16148 Pseudogene [Source:MGI Symbol;Acc:MGI:3801829]
ENSMUST00000029266	lower	5.04784e-07	1.03953e-08	Anxa5	annexin A5 Gene [Source:MGI Symbol;Acc:MGI:106008]
ENSMUST00000034232	higher	5.47014e-05	1.04439e-08	Ccl17	chemokine (C-C motif) ligand 17 Gene [Source:MGI Symbol;Acc:MGI:1329039]
ENSMUST00000057495	higher	5.47014e-05	1.04439e-08	Tmem161b	transmembrane protein 161B Gene [Source:MGI Symbol;Acc:MGI:1919995]
ENSMUST00000033265	higher	2.31778e-06	1.13466e-08	Zranb1	zinc finger, RAN-binding domain containing 1 Gene [Source:MGI Symbol;Acc:MGI:106441]
ENSMUST00000007803	higher	5.47014e-05	1.24292e-08	Bcl2l1	BCL2-like 1 Gene [Source:MGI Symbol;Acc:MGI:88139]
ENSMUST00000015901	higher	5.47014e-05	1.24292e-08	Ppil4	peptidylprolyl isomerase (cyclophilin)-like 4 Gene [Source:MGI Symbol;Acc:MGI:1914668]
ENSMUST00000053558	higher	5.47014e-05	1.24292e-08	Ankrd37	ankyrin repeat domain 37 Gene [Source:MGI Symbol;Acc:MGI:3603344]
ENSMUST00000039370	lower	0.0121897	1.33149e-08	Cacna2d1	calcium channel, voltage-dependent, alpha2/delta subunit 1 Gene [Source:MGI Symbol;Acc:MGI:88295]
ENSMUST00000118765	lower	0.0029839	1.34332e-08	Vps29	vacuolar protein sorting 29 (S. pombe) Gene [Source:MGI Symbol;Acc:MGI:1928344]
ENSMUST00000003156	lower	2.11901e-05	1.50757e-08	Atp5d	ATP synthase, H+ transporting, mitochondrial F1 complex, delta subunit Gene [Source:MGI Symbol;Acc:MGI:1913293]
ENSMUST00000021621	lower	2.11901e-05	1.50757e-08	Akr1e1	aldo-keto reductase family 1, member E1 Gene [Source:MGI Symbol;Acc:MGI:1914758]
ENSMUST00000038118	lower	2.11901e-05	1.50757e-08	Atp2c1	ATPase, Ca++-sequestering Gene [Source:MGI Symbol;Acc:MGI:1889008]
ENSMUST00000062058	lower	2.11901e-05	1.50757e-08	Lix1l	Lix1-like Gene [Source:MGI Symbol;Acc:MGI:3036267]
ENSMUST00000112627	lower	2.11901e-05	1.50757e-08	Nr4a2	nuclear receptor subfamily 4, group A, member 2 Gene [Source:MGI Symbol;Acc:MGI:1352456]
ENSMUST00000114935	lower	2.11901e-05	1.50757e-08	Cuta	cutA divalent cation tolerance homolog (E. coli) Gene [Source:MGI Symbol;Acc:MGI:1914925]
ENSMUST00000121382	lower	2.76228e-05	1.5285e-08	Gm11477	predicted gene 11477 Pseudogene [Source:MGI Symbol;Acc:MGI:3651531]
ENSMUST00000058644	lower	0.000252043	1.55753e-08	Tmem196	transmembrane protein 196 Gene [Source:MGI Symbol;Acc:MGI:2685374]
ENSMUST00000114251	lower	0.000252043	1.55753e-08	Ptgds	prostaglandin D2 synthase (brain) Gene [Source:MGI Symbol;Acc:MGI:99261]
ENSMUST00000114259	lower	0.000252043	1.55753e-08	Ptgds	prostaglandin D2 synthase (brain) Gene [Source:MGI Symbol;Acc:MGI:99261]
ENSMUST00000115231	lower	0.000252043	1.55753e-08	Rpl39	ribosomal protein L39 Gene [Source:MGI Symbol;Acc:MGI:1914498]
ENSMUST00000075650	higher	1.27959e-05	1.57242e-08	Gm9761	predicted gene 9761 Pseudogene [Source:MGI Symbol;Acc:MGI:3708640]
ENSMUST00000028583	higher	0.000437774	1.60623e-08	Lin7c	lin-7 homolog C (C. elegans) Gene [Source:MGI Symbol;Acc:MGI:1330839]
ENSMUST00000119968	lower	0.000386947	1.64846e-08	Mrpl24	mitochondrial ribosomal protein L24 Gene [Source:MGI Symbol;Acc:MGI:1914957]
ENSMUST00000121738	lower	0.000386947	1.64846e-08	Srr	serine racemase Gene [Source:MGI Symbol;Acc:MGI:1351636]
ENSMUST00000008131	lower	0.00215078	1.83212e-08	Rabl5	RAB, member of RAS oncogene family-like 5 Gene [Source:MGI Symbol;Acc:MGI:1914536]
ENSMUST00000064656	lower	0.00215078	1.83212e-08	Zfp365	zinc finger protein 365 Gene [Source:MGI Symbol;Acc:MGI:2143676]
ENSMUST00000100685	higher	1.90394e-05	1.86833e-08	Ggnbp2	gametogenetin binding protein 2 Gene [Source:MGI Symbol;Acc:MGI:2387356]
ENSMUST00000105861	higher	1.90394e-05	1.86833e-08	Srrm1	serine/arginine repetitive matrix 1 Gene [Source:MGI Symbol;Acc:MGI:1858303]
ENSMUST00000113758	higher	1.90394e-05	1.86833e-08	Odf2	outer dense fiber of sperm tails 2 Gene [Source:MGI Symbol;Acc:MGI:1098824]
ENSMUST00000075178	lower	7.87616e-05	1.87623e-08	Rpl18	ribosomal protein L18 Gene [Source:MGI Symbol;Acc:MGI:98003]
ENSMUST00000068021	higher	0.00357258	1.90583e-08	Pecam1	platelet/endothelial cell adhesion molecule 1 Gene [Source:MGI Symbol;Acc:MGI:97537]
ENSMUST00000089805	lower	0.0470905	1.97469e-08	Dclk1	doublecortin-like kinase 1 Gene [Source:MGI Symbol;Acc:MGI:1330861]
ENSMUST00000108644	lower	0.0266491	1.97884e-08	Ndufa3	NADH dehydrogenase (ubiquinone) 1 alpha subcomplex, 3 Gene [Source:MGI Symbol;Acc:MGI:1913341]
ENSMUST00000068487	higher	0.000241157	2.08821e-08	Rad18	RAD18 homolog (S. cerevisiae) Gene [Source:MGI Symbol;Acc:MGI:1890476]
ENSMUST00000043864	lower	3.00332e-05	2.1199e-08	Cdc123	cell division cycle 123 homolog (S. cerevisiae) Gene [Source:MGI Symbol;Acc:MGI:2138811]
ENSMUST00000065977	lower	3.00332e-05	2.1199e-08	Nrd1	nardilysin, N-arginine dibasic convertase, NRD convertase 1 Gene [Source:MGI Symbol;Acc:MGI:1201386]
ENSMUST00000064795	lower	0.000353335	2.18347e-08	Egr1	early growth response 1 Gene [Source:MGI Symbol;Acc:MGI:95295]
ENSMUST00000118059	lower	0.000353335	2.18347e-08	Unc50	unc-50 homolog (C. elegans) Gene [Source:MGI Symbol;Acc:MGI:1914637]
ENSMUST00000118863	lower	0.000527429	2.24693e-08	Rpl18-ps2	ribosomal protein L18, pseudogene 2 Pseudogene [Source:MGI Symbol;Acc:MGI:3646997]
ENSMUST00000105981	higher	0.000170382	2.54294e-08	Epb4.1	erythrocyte protein band 4.1 Gene [Source:MGI Symbol;Acc:MGI:95401]
ENSMUST00000062600	higher	0.000739775	2.61977e-08	Rufy2	RUN and FYVE domain-containing 2 Gene [Source:MGI Symbol;Acc:MGI:1917682]
ENSMUST00000040448	higher	2.17252e-05	2.66969e-08	Mtmr3	myotubularin related protein 3 Gene [Source:MGI Symbol;Acc:MGI:1921552]
ENSMUST00000102770	higher	2.17252e-05	2.66969e-08	NA	NA
ENSMUST00000112690	higher	0.000556873	2.72339e-08	Hfm1	HFM1, ATP-dependent DNA helicase homolog (S. cerevisiae) Gene [Source:MGI Symbol;Acc:MGI:3036246]
ENSMUST00000002305	lower	1.24782e-05	2.77133e-08	Jhdm1d	jumonji C domain-containing histone demethylase 1 homolog D (S. cerevisiae) Gene [Source:MGI Symbol;Acc:MGI:2443388]
ENSMUST00000076219	lower	1.24782e-05	2.77133e-08	D19Bwg1357e	DNA segment, Chr 19, Brigham & Women's Genetics 1357 expressed Gene [Source:MGI Symbol;Acc:MGI:106253]
ENSMUST00000036004	higher	2.33467e-05	2.77191e-08	Hnrnpa1	heterogeneous nuclear ribonucleoprotein A1 Gene [Source:MGI Symbol;Acc:MGI:104820]
ENSMUST00000111287	higher	2.73703e-06	2.84595e-08	Caln1	calneuron 1 Gene [Source:MGI Symbol;Acc:MGI:2155987]
ENSMUST00000058864	higher	0.0472979	2.91995e-08	Camta1	calmodulin binding transcription activator 1 Gene [Source:MGI Symbol;Acc:MGI:2140230]
ENSMUST00000039554	higher	0.000393718	3.40924e-08	Trmt6	tRNA methyltransferase 6 homolog (S. cerevisiae) Gene [Source:MGI Symbol;Acc:MGI:1914176]
ENSMUST00000108081	higher	0.000393718	3.40924e-08	Ggnbp2	gametogenetin binding protein 2 Gene [Source:MGI Symbol;Acc:MGI:2387356]
ENSMUST00000110126	higher	0.000393718	3.40924e-08	NA	NA
ENSMUST00000122135	higher	0.000393718	3.40924e-08	Gm14840	predicted gene 14840 Pseudogene [Source:MGI Symbol;Acc:MGI:3801922]
ENSMUST00000007921	lower	1.13636e-05	3.52959e-08	0610009B22Rik	RIKEN cDNA 0610009B22 gene Gene [Source:MGI Symbol;Acc:MGI:1913300]
ENSMUST00000034623	lower	1.13636e-05	3.52959e-08	Trappc4	trafficking protein particle complex 4 Gene [Source:MGI Symbol;Acc:MGI:1926211]
ENSMUST00000048289	lower	1.13636e-05	3.52959e-08	Egr2	early growth response 2 Gene [Source:MGI Symbol;Acc:MGI:95296]
ENSMUST00000106593	lower	1.13636e-05	3.52959e-08	NA	NA
ENSMUST00000109734	lower	1.13636e-05	3.52959e-08	Prdx2	peroxiredoxin 2 Gene [Source:MGI Symbol;Acc:MGI:109486]
ENSMUST00000112558	lower	1.13636e-05	3.52959e-08	Atp2c1	ATPase, Ca++-sequestering Gene [Source:MGI Symbol;Acc:MGI:1889008]
ENSMUST00000025052	lower	0.00605718	3.58404e-08	Rps10	ribosomal protein S10 Gene [Source:MGI Symbol;Acc:MGI:1914347]
ENSMUST00000036653	lower	0.000138793	3.76426e-08	Htr2a	5-hydroxytryptamine (serotonin) receptor 2A Gene [Source:MGI Symbol;Acc:MGI:109521]
ENSMUST00000072735	lower	0.000138793	3.76426e-08	Fam173a	family with sequence similarity 173, member A Gene [Source:MGI Symbol;Acc:MGI:2384888]
ENSMUST00000095180	lower	0.000138793	3.76426e-08	Mettl4	methyltransferase like 4 Gene [Source:MGI Symbol;Acc:MGI:1924031]
ENSMUST00000109928	lower	0.000138793	3.76426e-08	NA	NA
ENSMUST00000112090	lower	0.000138793	3.76426e-08	Dynll1	dynein light chain LC8-type 1 Gene [Source:MGI Symbol;Acc:MGI:1861457]
ENSMUST00000013304	lower	0.00169933	4.09304e-08	Atp6v0d1	ATPase, H+ transporting, lysosomal V0 subunit D1 Gene [Source:MGI Symbol;Acc:MGI:1201778]
ENSMUST00000117644	lower	4.997e-06	4.13644e-08	Cryzl1	crystallin, zeta (quinone reductase)-like 1 Gene [Source:MGI Symbol;Acc:MGI:1913859]
ENSMUST00000036043	lower	0.000138793	4.19939e-08	Slitrk2	SLIT and NTRK-like family, member 2 Gene [Source:MGI Symbol;Acc:MGI:2679449]
ENSMUST00000059250	lower	0.000138793	4.19939e-08	Brms1l	breast cancer metastasis-suppressor 1-like Gene [Source:MGI Symbol;Acc:MGI:1196337]
ENSMUST00000120593	higher	6.91378e-06	4.27046e-08	Bcl7a	B-cell CLL/lymphoma 7A Gene [Source:MGI Symbol;Acc:MGI:1924295]
ENSMUST00000076037	lower	2.26399e-06	4.29438e-08	Mrps36	mitochondrial ribosomal protein S36 Gene [Source:MGI Symbol;Acc:MGI:1913378]
ENSMUST00000118658	lower	2.26399e-06	4.29438e-08	Mrps36-ps2	mitochondrial ribosomal protein S36, pseudogene 2 Pseudogene [Source:MGI Symbol;Acc:MGI:3704298]
ENSMUST00000122233	lower	2.26399e-06	4.29438e-08	Kif2a	kinesin family member 2A Gene [Source:MGI Symbol;Acc:MGI:108390]
ENSMUST00000031418	lower	3.00681e-05	4.45786e-08	Vps29	vacuolar protein sorting 29 (S. pombe) Gene [Source:MGI Symbol;Acc:MGI:1928344]
ENSMUST00000034965	lower	3.00681e-05	4.45786e-08	Snapc5	small nuclear RNA activating complex, polypeptide 5 Gene [Source:MGI Symbol;Acc:MGI:1914282]
ENSMUST00000099550	lower	3.00681e-05	4.45786e-08	NA	NA
ENSMUST00000121930	lower	3.00681e-05	4.45786e-08	Acyp1	acylphosphatase 1, erythrocyte (common) type Gene [Source:MGI Symbol;Acc:MGI:1913454]
ENSMUST00000119359	lower	0.000728099	4.60532e-08	Gm4853	predicted pseudogene 4853 Pseudogene [Source:MGI Symbol;Acc:MGI:3644655]
ENSMUST00000052888	higher	0.00131427	4.82217e-08	Gm10254	predicted gene 10254 Pseudogene [Source:MGI Symbol;Acc:MGI:3708673]
ENSMUST00000115749	lower	2.4068e-05	4.99468e-08	Dnm1l	dynamin 1-like Gene [Source:MGI Symbol;Acc:MGI:1921256]
ENSMUST00000028553	lower	0.000853056	4.99947e-08	Nop10	NOP10 ribonucleoprotein homolog (yeast) Gene [Source:MGI Symbol;Acc:MGI:1913431]
ENSMUST00000121637	lower	0.000853056	4.99947e-08	Gm14383	predicted gene 14383 Pseudogene [Source:MGI Symbol;Acc:MGI:3650547]
ENSMUST00000058407	lower	5.53147e-05	5.04861e-08	Uqcr10	ubiquinol-cytochrome c reductase, complex III subunit X Gene [Source:MGI Symbol;Acc:MGI:1913402]
ENSMUST00000112121	lower	1.87237e-06	5.18391e-08	Mlec	malectin Gene [Source:MGI Symbol;Acc:MGI:1924015]
ENSMUST00000004396	lower	0.000158549	5.23267e-08	Atp6v1f	ATPase, H+ transporting, lysosomal V1 subunit F Gene [Source:MGI Symbol;Acc:MGI:1913394]
ENSMUST00000013842	lower	0.000158549	5.23267e-08	Pea15a	phosphoprotein enriched in astrocytes 15A Gene [Source:MGI Symbol;Acc:MGI:104799]
ENSMUST00000109492	lower	0.000158549	5.23267e-08	Homer1	homer homolog 1 (Drosophila) Gene [Source:MGI Symbol;Acc:MGI:1347345]
ENSMUST00000058437	higher	0.00159685	5.28183e-08	Rpl7	ribosomal protein L7 Gene [Source:MGI Symbol;Acc:MGI:98073]
ENSMUST00000090413	higher	1.31139e-05	5.38905e-08	Utp3	UTP3, small subunit (SSU) processome component, homolog (S. cerevisiae) Gene [Source:MGI Symbol;Acc:MGI:1919230]
ENSMUST00000034270	lower	0.00475462	5.39531e-08	Map1lc3b	microtubule-associated protein 1 light chain 3 beta Gene [Source:MGI Symbol;Acc:MGI:1914693]
ENSMUST00000077309	lower	0.00475462	5.39531e-08	Gm4953	predicted pseudogene 4953 Pseudogene [Source:MGI Symbol;Acc:MGI:3647627]
ENSMUST00000023934	lower	0.00773372	5.40945e-08	Hbb-b1	hemoglobin, beta adult major chain Gene [Source:MGI Symbol;Acc:MGI:96021]
ENSMUST00000021049	lower	0.00089836	5.55151e-08	Psmc5	protease (prosome, macropain) 26S subunit, ATPase 5 Gene [Source:MGI Symbol;Acc:MGI:105047]
ENSMUST00000115870	higher	0.00357258	5.55977e-08	Epc1	enhancer of polycomb homolog 1 (Drosophila) Gene [Source:MGI Symbol;Acc:MGI:1278322]
ENSMUST00000099382	lower	0.000422537	5.61191e-08	Gnptab	N-acetylglucosamine-1-phosphate transferase, alpha and beta subunits Gene [Source:MGI Symbol;Acc:MGI:3643902]
ENSMUST00000023087	higher	0.000262459	6.09726e-08	Twf1	twinfilin, actin-binding protein, homolog 1 (Drosophila) Gene [Source:MGI Symbol;Acc:MGI:1100520]
ENSMUST00000098603	higher	0.0001233	6.12504e-08	Tet2	tet oncogene family member 2 Gene [Source:MGI Symbol;Acc:MGI:2443298]
ENSMUST00000020444	higher	0.00242884	6.51227e-08	Llph	LLP homolog, long-term synaptic facilitation (Aplysia) Gene [Source:MGI Symbol;Acc:MGI:1913475]
ENSMUST00000027052	lower	4.3657e-06	6.73456e-08	Stau2	staufen (RNA binding protein) homolog 2 (Drosophila) Gene [Source:MGI Symbol;Acc:MGI:1352508]
ENSMUST00000023698	higher	4.06767e-05	6.7346e-08	Gcfc1	GC-rich sequence DNA-binding factor 1 Gene [Source:MGI Symbol;Acc:MGI:1914617]
ENSMUST00000114445	higher	4.18262e-05	6.92491e-08	Cbx3	chromobox homolog 3 (Drosophila HP1 gamma) Gene [Source:MGI Symbol;Acc:MGI:108515]
ENSMUST00000105980	higher	0.000112678	7.10807e-08	NA	NA
ENSMUST00000088647	higher	0.00112454	8.05843e-08	Tcea1-ps1	transcription elongation factor A (SII) 1, pseudogene 1 Pseudogene [Source:MGI Symbol;Acc:MGI:1861432]
ENSMUST00000066905	lower	0.0355777	8.0853e-08	Chl1	cell adhesion molecule with homology to L1CAM Gene [Source:MGI Symbol;Acc:MGI:1098266]
ENSMUST00000023766	higher	0.000433606	8.31911e-08	Larp4	La ribonucleoprotein domain family, member 4 Gene [Source:MGI Symbol;Acc:MGI:2443114]
ENSMUST00000057632	higher	0.000433606	8.31911e-08	Larp4	La ribonucleoprotein domain family, member 4 Gene [Source:MGI Symbol;Acc:MGI:2443114]
ENSMUST00000042471	higher	0.000132123	8.33474e-08	Dis3	DIS3 mitotic control homolog (S. cerevisiae) Gene [Source:MGI Symbol;Acc:MGI:1919912]
ENSMUST00000112548	higher	0.0325158	8.42717e-08	Baz2b	bromodomain adjacent to zinc finger domain, 2B Gene [Source:MGI Symbol;Acc:MGI:2442782]
ENSMUST00000067298	lower	0.000222593	8.47959e-08	Mrps21	mitochondrial ribosomal protein S21 Gene [Source:MGI Symbol;Acc:MGI:1913542]
ENSMUST00000114132	lower	0.000222593	8.47959e-08	Zdbf2	zinc finger, DBF-type containing 2 Gene [Source:MGI Symbol;Acc:MGI:1921134]
ENSMUST00000006128	lower	0.0189112	8.51362e-08	Rcn1	reticulocalbin 1 Gene [Source:MGI Symbol;Acc:MGI:104559]
ENSMUST00000038644	lower	6.45956e-05	8.54049e-08	Rangrf	RAN guanine nucleotide release factor Gene [Source:MGI Symbol;Acc:MGI:1889073]
ENSMUST00000109904	lower	6.45956e-05	8.54049e-08	Tmem184c	transmembrane protein 184C Gene [Source:MGI Symbol;Acc:MGI:2384562]
ENSMUST00000121048	lower	6.45956e-05	8.54049e-08	Mrpl24	mitochondrial ribosomal protein L24 Gene [Source:MGI Symbol;Acc:MGI:1914957]
ENSMUST00000034997	higher	0.000162082	8.78297e-08	2810026P18Rik	RIKEN cDNA 2810026P18 gene Gene [Source:MGI Symbol;Acc:MGI:1919905]
ENSMUST00000100686	higher	0.000162082	8.78297e-08	Ggnbp2	gametogenetin binding protein 2 Gene [Source:MGI Symbol;Acc:MGI:2387356]
ENSMUST00000120716	higher	0.000162082	8.78297e-08	Hmgn4	high mobility group nucleosomal binding domain 4 Pseudogene [Source:MGI Symbol;Acc:MGI:3783162]
ENSMUST00000110615	lower	0.000641874	9.32947e-08	Serf2	small EDRK-rich factor 2 Gene [Source:MGI Symbol;Acc:MGI:1337041]
ENSMUST00000112331	lower	0.000641874	9.32947e-08	Slmap	sarcolemma associated protein Gene [Source:MGI Symbol;Acc:MGI:1933549]
ENSMUST00000117262	lower	0.000641874	9.32947e-08	Slc4a1ap	solute carrier family 4 (anion exchanger), member 1, adaptor protein Gene [Source:MGI Symbol;Acc:MGI:1196608]
ENSMUST00000113264	lower	1.39634e-05	9.46635e-08	Cntn4	contactin 4 Gene [Source:MGI Symbol;Acc:MGI:1095737]
ENSMUST00000020452	lower	2.76228e-05	9.91568e-08	Prmt2	protein arginine N-methyltransferase 2 Gene [Source:MGI Symbol;Acc:MGI:1316652]
ENSMUST00000033431	lower	2.76228e-05	9.91568e-08	Slc25a14	solute carrier family 25 (mitochondrial carrier, brain), member 14 Gene [Source:MGI Symbol;Acc:MGI:1330823]
ENSMUST00000003079	lower	6.45956e-05	1.0036e-07	Prkar2b	protein kinase, cAMP dependent regulatory, type II beta Gene [Source:MGI Symbol;Acc:MGI:97760]
ENSMUST00000017520	lower	6.45956e-05	1.0036e-07	Nlk	nemo like kinase Gene [Source:MGI Symbol;Acc:MGI:1201387]
ENSMUST00000022767	lower	6.45956e-05	1.0036e-07	Mettl3	methyltransferase like 3 Gene [Source:MGI Symbol;Acc:MGI:1927165]
ENSMUST00000050491	lower	6.45956e-05	1.0036e-07	Glrx2	glutaredoxin 2 (thioltransferase) Gene [Source:MGI Symbol;Acc:MGI:1916617]
ENSMUST00000096057	lower	6.45956e-05	1.0036e-07	Tagln3	transgelin 3 Gene [Source:MGI Symbol;Acc:MGI:1926784]
ENSMUST00000109733	lower	6.45956e-05	1.0036e-07	Prdx2	peroxiredoxin 2 Gene [Source:MGI Symbol;Acc:MGI:109486]
ENSMUST00000111146	lower	6.45956e-05	1.0036e-07	NA	NA
ENSMUST00000110120	higher	0.00756964	1.04996e-07	Tmx4	thioredoxin-related transmembrane protein 4 Gene [Source:MGI Symbol;Acc:MGI:106558]
ENSMUST00000033683	lower	0.00252313	1.0749e-07	Rps4x	ribosomal protein S4, X-linked Gene [Source:MGI Symbol;Acc:MGI:98158]
ENSMUST00000115205	lower	0.000405837	1.10387e-07	Dlg1	discs, large homolog 1 (Drosophila) Gene [Source:MGI Symbol;Acc:MGI:107231]
ENSMUST00000026823	lower	0.0018023	1.11375e-07	Pigq	phosphatidylinositol glycan anchor biosynthesis, class Q Gene [Source:MGI Symbol;Acc:MGI:1333114]
ENSMUST00000002403	lower	0.00446803	1.15206e-07	Dhrs1	dehydrogenase/reductase (SDR family) member 1 Gene [Source:MGI Symbol;Acc:MGI:1196314]
ENSMUST00000023460	lower	0.000853056	1.20232e-07	Ncbp2	nuclear cap binding protein subunit 2 Gene [Source:MGI Symbol;Acc:MGI:1915342]
ENSMUST00000032800	lower	0.000853056	1.20232e-07	Tyrobp	TYRO protein tyrosine kinase binding protein Gene [Source:MGI Symbol;Acc:MGI:1277211]
ENSMUST00000072865	lower	0.000853056	1.20232e-07	Dgkb	diacylglycerol kinase, beta Gene [Source:MGI Symbol;Acc:MGI:2442474]
ENSMUST00000111608	lower	0.000853056	1.20232e-07	Ankrd45	ankyrin repeat domain 45 Gene [Source:MGI Symbol;Acc:MGI:1921094]
ENSMUST00000065167	higher	0.00686839	1.26121e-07	Adrbk2	adrenergic receptor kinase, beta 2 Gene [Source:MGI Symbol;Acc:MGI:87941]
ENSMUST00000042753	higher	1.90394e-05	1.26827e-07	C030048B08Rik	RIKEN cDNA C030048B08 gene Gene [Source:MGI Symbol;Acc:MGI:2442653]
ENSMUST00000091531	higher	1.90394e-05	1.26827e-07	Gm5196	predicted gene 5196 Pseudogene [Source:MGI Symbol;Acc:MGI:3645820]
ENSMUST00000107107	higher	1.90394e-05	1.26827e-07	Plaa	phospholipase A2, activating protein Gene [Source:MGI Symbol;Acc:MGI:104810]
ENSMUST00000080309	lower	0.0213645	1.31265e-07	NA	NA
ENSMUST00000035925	higher	5.47014e-05	1.3272e-07	Slc7a6os	solute carrier family 7, member 6 opposite strand Gene [Source:MGI Symbol;Acc:MGI:1916951]
ENSMUST00000112900	higher	5.47014e-05	1.3272e-07	Anubl1	AN1, ubiquitin-like, homolog (Xenopus laevis) Gene [Source:MGI Symbol;Acc:MGI:1914742]
ENSMUST00000115230	higher	5.47014e-05	1.3272e-07	Apod	apolipoprotein D Gene [Source:MGI Symbol;Acc:MGI:88056]
ENSMUST00000007971	lower	4.997e-06	1.3513e-07	Ankrd26	ankyrin repeat domain 26 Gene [Source:MGI Symbol;Acc:MGI:1917887]
ENSMUST00000115717	lower	4.997e-06	1.3513e-07	Pde10a	phosphodiesterase 10A Gene [Source:MGI Symbol;Acc:MGI:1345143]
ENSMUST00000098432	lower	0.000252043	1.39468e-07	Rpl10-ps2	ribosomal protein L10, pseudogene 2 Pseudogene [Source:MGI Symbol;Acc:MGI:3648679]
ENSMUST00000026986	lower	3.00332e-05	1.57488e-07	Higd2a	HIG1 domain family, member 2A Gene [Source:MGI Symbol;Acc:MGI:1914294]
ENSMUST00000098946	lower	3.00332e-05	1.57488e-07	Smarca4	SWI/SNF related, matrix associated, actin dependent regulator of chromatin, subfamily a, member 4 Gene [Source:MGI Symbol;Acc:MGI:88192]
ENSMUST00000100058	lower	3.00332e-05	1.57488e-07	Vta1	Vps20-associated 1 homolog (S. cerevisiae) Gene [Source:MGI Symbol;Acc:MGI:1913451]
ENSMUST00000109156	lower	3.00332e-05	1.57488e-07	NA	NA
ENSMUST00000051229	lower	0.0266491	1.57683e-07	Etv5	ets variant gene 5 Gene [Source:MGI Symbol;Acc:MGI:1096867]
ENSMUST00000042641	lower	2.11901e-05	1.58511e-07	Zfp60	zinc finger protein 60 Gene [Source:MGI Symbol;Acc:MGI:99207]
ENSMUST00000106595	lower	2.11901e-05	1.58511e-07	Elavl4	ELAV (embryonic lethal, abnormal vision, Drosophila)-like 4 (Hu antigen D) Gene [Source:MGI Symbol;Acc:MGI:107427]
ENSMUST00000115787	lower	2.11901e-05	1.58511e-07	Synj2	synaptojanin 2 Gene [Source:MGI Symbol;Acc:MGI:1201671]
ENSMUST00000022009	higher	5.47014e-05	1.61619e-07	Cetn3	centrin 3 Gene [Source:MGI Symbol;Acc:MGI:1097706]
ENSMUST00000027215	higher	5.47014e-05	1.61619e-07	1700029F09Rik	RIKEN cDNA 1700029F09 gene Gene [Source:MGI Symbol;Acc:MGI:1922873]
ENSMUST00000030091	higher	5.47014e-05	1.61619e-07	Pole3	polymerase (DNA directed), epsilon 3 (p17 subunit) Gene [Source:MGI Symbol;Acc:MGI:1933378]
ENSMUST00000034834	higher	0.000739775	1.68091e-07	Pkm2	pyruvate kinase, muscle Gene [Source:MGI Symbol;Acc:MGI:97591]
ENSMUST00000038228	higher	0.000739775	1.68091e-07	Tmx4	thioredoxin-related transmembrane protein 4 Gene [Source:MGI Symbol;Acc:MGI:106558]
ENSMUST00000048621	higher	0.000739775	1.68091e-07	Pmch	pro-melanin-concentrating hormone Gene [Source:MGI Symbol;Acc:MGI:97629]
ENSMUST00000107852	higher	0.000739775	1.68091e-07	Mbtd1	mbt domain containing 1 Gene [Source:MGI Symbol;Acc:MGI:2143977]
ENSMUST00000113005	higher	0.000739775	1.68091e-07	Cnot6l	CCR4-NOT transcription complex, subunit 6-like Gene [Source:MGI Symbol;Acc:MGI:2443154]
ENSMUST00000031862	higher	6.93269e-05	1.68205e-07	Cbx3	chromobox homolog 3 (Drosophila HP1 gamma) Gene [Source:MGI Symbol;Acc:MGI:108515]
ENSMUST00000005750	lower	0.000269018	1.71789e-07	NA	NA
ENSMUST00000092645	lower	0.000269018	1.71789e-07	Epb4.1l2	erythrocyte protein band 4.1-like 2 Gene [Source:MGI Symbol;Acc:MGI:103009]
ENSMUST00000038613	lower	0.0029839	1.84393e-07	Gm15430	predicted gene 15430 Pseudogene [Source:MGI Symbol;Acc:MGI:3705781]
ENSMUST00000007555	higher	0.00540155	1.91285e-07	Mark3	MAP/microtubule affinity-regulating kinase 3 Gene [Source:MGI Symbol;Acc:MGI:1341865]
ENSMUST00000048187	lower	0.00450662	1.91989e-07	Ppp1r14a	protein phosphatase 1, regulatory (inhibitor) subunit 14A Gene [Source:MGI Symbol;Acc:MGI:1931139]
ENSMUST00000076951	lower	0.00450662	1.91989e-07	Spry3	sprouty homolog 3 (Drosophila) Gene [Source:MGI Symbol;Acc:MGI:1345188]
ENSMUST00000084846	higher	7.22763e-05	1.92281e-07	Srrm1	serine/arginine repetitive matrix 1 Gene [Source:MGI Symbol;Acc:MGI:1858303]
ENSMUST00000114792	higher	1.27959e-05	1.93376e-07	Fkbp5	FK506 binding protein 5 Gene [Source:MGI Symbol;Acc:MGI:104670]
ENSMUST00000020652	higher	0.00229894	1.99068e-07	NA	NA
ENSMUST00000030841	higher	0.00229894	1.99068e-07	Klhl7	kelch-like 7 (Drosophila) Gene [Source:MGI Symbol;Acc:MGI:1196453]
ENSMUST00000120441	higher	0.00229894	1.99068e-07	Plekha1	pleckstrin homology domain containing, family A (phosphoinositide binding specific) member 1 Gene [Source:MGI Symbol;Acc:MGI:2442213]
ENSMUST00000049893	higher	0.00112454	2.14702e-07	NA	NA
ENSMUST00000021221	higher	2.17252e-05	2.25898e-07	Mbtd1	mbt domain containing 1 Gene [Source:MGI Symbol;Acc:MGI:2143977]
ENSMUST00000081138	higher	2.17252e-05	2.25898e-07	Gm6984	predicted gene 6984 Pseudogene [Source:MGI Symbol;Acc:MGI:3646710]
ENSMUST00000102930	higher	2.17252e-05	2.25898e-07	Ewsr1	Ewing sarcoma breakpoint region 1 Gene [Source:MGI Symbol;Acc:MGI:99960]
ENSMUST00000107854	higher	2.17252e-05	2.25898e-07	Mbtd1	mbt domain containing 1 Gene [Source:MGI Symbol;Acc:MGI:2143977]
ENSMUST00000057288	lower	4.997e-06	2.26237e-07	Pdia6	protein disulfide isomerase associated 6 Gene [Source:MGI Symbol;Acc:MGI:1919103]
ENSMUST00000077119	lower	4.997e-06	2.26237e-07	Gjc3	gap junction protein, gamma 3 Gene [Source:MGI Symbol;Acc:MGI:2153041]
ENSMUST00000080545	lower	5.14846e-06	2.31941e-07	Rpl9-ps4	ribosomal protein L9, pseudogene 4 Pseudogene [Source:MGI Symbol;Acc:MGI:3704410]
ENSMUST00000116601	lower	1.13636e-05	2.34016e-07	NA	NA
ENSMUST00000032386	higher	0.000241157	2.36648e-07	Bhlhe41	basic helix-loop-helix family, member e41 Gene [Source:MGI Symbol;Acc:MGI:1930704]
ENSMUST00000067947	higher	0.000241157	2.36648e-07	Rock1	Rho-associated coiled-coil containing protein kinase 1 Gene [Source:MGI Symbol;Acc:MGI:107927]
ENSMUST00000071076	lower	2.11901e-05	2.40749e-07	Grm7	glutamate receptor, metabotropic 7 Gene [Source:MGI Symbol;Acc:MGI:1351344]
ENSMUST00000105975	higher	0.000226507	2.45137e-07	Epb4.1	erythrocyte protein band 4.1 Gene [Source:MGI Symbol;Acc:MGI:95401]
ENSMUST00000119503	higher	0.000226507	2.45137e-07	Hmgb1-ps6	high mobility group box 1, pseudogene 6 Pseudogene [Source:MGI Symbol;Acc:MGI:3776507]
ENSMUST00000001716	lower	0.000353335	2.49402e-07	Ddt	D-dopachrome tautomerase Gene [Source:MGI Symbol;Acc:MGI:1298381]
ENSMUST00000033591	lower	0.000353335	2.49402e-07	Itm2a	integral membrane protein 2A Gene [Source:MGI Symbol;Acc:MGI:107706]
ENSMUST00000033839	lower	0.000353335	2.49402e-07	2410022L05Rik	RIKEN cDNA 2410022L05 gene Gene [Source:MGI Symbol;Acc:MGI:1913673]
ENSMUST00000033967	lower	0.000353335	2.49402e-07	Slit2	slit homolog 2 (Drosophila) Gene [Source:MGI Symbol;Acc:MGI:1315205]
ENSMUST00000105257	lower	0.000353335	2.49402e-07	Slc16a7	solute carrier family 16 (monocarboxylic acid transporters), member 7 Gene [Source:MGI Symbol;Acc:MGI:1330284]
ENSMUST00000111357	lower	0.000353335	2.49402e-07	Rgs4	regulator of G-protein signaling 4 Gene [Source:MGI Symbol;Acc:MGI:108409]
ENSMUST00000102553	higher	0.000739775	2.66716e-07	Hmgn2	high mobility group nucleosomal binding domain 2 Gene [Source:MGI Symbol;Acc:MGI:96136]
ENSMUST00000105974	higher	0.000739775	2.66716e-07	Epb4.1	erythrocyte protein band 4.1 Gene [Source:MGI Symbol;Acc:MGI:95401]
ENSMUST00000008966	lower	0.000386947	2.75294e-07	Acyp1	acylphosphatase 1, erythrocyte (common) type Gene [Source:MGI Symbol;Acc:MGI:1913454]
ENSMUST00000112846	lower	0.000386947	2.75294e-07	Mapk10	mitogen-activated protein kinase 10 Gene [Source:MGI Symbol;Acc:MGI:1346863]
ENSMUST00000111975	higher	0.00759698	2.7874e-07	Taok3	TAO kinase 3 Gene [Source:MGI Symbol;Acc:MGI:3041177]
ENSMUST00000014141	lower	5.53147e-05	2.90059e-07	NA	NA
ENSMUST00000020165	lower	5.53147e-05	2.90059e-07	Pde7b	phosphodiesterase 7B Gene [Source:MGI Symbol;Acc:MGI:1352752]
ENSMUST00000030583	lower	0.0121897	2.93602e-07	Ak2	adenylate kinase 2 Gene [Source:MGI Symbol;Acc:MGI:87978]
ENSMUST00000037623	lower	0.0121897	2.93602e-07	Nrn1	neuritin 1 Gene [Source:MGI Symbol;Acc:MGI:1915654]
ENSMUST00000079464	lower	0.0121897	2.93602e-07	Tuba4a	tubulin, alpha 4A Gene [Source:MGI Symbol;Acc:MGI:1095410]
ENSMUST00000102604	lower	0.0121897	2.93602e-07	Ak2	adenylate kinase 2 Gene [Source:MGI Symbol;Acc:MGI:87978]
ENSMUST00000122384	lower	0.0121897	2.93602e-07	Mras	muscle and microspikes RAS Gene [Source:MGI Symbol;Acc:MGI:1100856]
ENSMUST00000079413	higher	6.91378e-06	2.95992e-07	Fkbp5	FK506 binding protein 5 Gene [Source:MGI Symbol;Acc:MGI:104670]
ENSMUST00000090771	higher	6.91378e-06	2.95992e-07	Txnip	thioredoxin interacting protein Gene [Source:MGI Symbol;Acc:MGI:1889549]
ENSMUST00000046094	lower	0.0266491	3.02401e-07	Ppp1ca	protein phosphatase 1, catalytic subunit, alpha isoform Gene [Source:MGI Symbol;Acc:MGI:103016]
ENSMUST00000078272	lower	0.0266491	3.02401e-07	Cacna2d1	calcium channel, voltage-dependent, alpha2/delta subunit 1 Gene [Source:MGI Symbol;Acc:MGI:88295]
ENSMUST00000022145	lower	0.000138793	3.08249e-07	Serf1	small EDRK-rich factor 1 Gene [Source:MGI Symbol;Acc:MGI:1337114]
ENSMUST00000064793	lower	0.000138793	3.08249e-07	R3hdm2	R3H domain containing 2 Gene [Source:MGI Symbol;Acc:MGI:1919000]
ENSMUST00000106486	lower	0.000138793	3.08249e-07	Mast2	microtubule associated serine/threonine kinase 2 Gene [Source:MGI Symbol;Acc:MGI:894676]
ENSMUST00000107111	lower	0.000138793	3.08249e-07	Elavl2	ELAV (embryonic lethal, abnormal vision, Drosophila)-like 2 (Hu antigen B) Gene [Source:MGI Symbol;Acc:MGI:1100887]
ENSMUST00000076657	lower	0.0470905	3.29381e-07	Ndufa3	NADH dehydrogenase (ubiquinone) 1 alpha subcomplex, 3 Gene [Source:MGI Symbol;Acc:MGI:1913341]
ENSMUST00000026459	lower	0.00109775	3.32141e-07	Atp5b	ATP synthase, H+ transporting mitochondrial F1 complex, beta subunit Gene [Source:MGI Symbol;Acc:MGI:107801]
ENSMUST00000029596	lower	0.00109775	3.32141e-07	NA	NA
ENSMUST00000034707	lower	0.00109775	3.32141e-07	Smarca4	SWI/SNF related, matrix associated, actin dependent regulator of chromatin, subfamily a, member 4 Gene [Source:MGI Symbol;Acc:MGI:88192]
ENSMUST00000075242	lower	0.00109775	3.32141e-07	Hspe1	heat shock protein 1 (chaperonin 10) Gene [Source:MGI Symbol;Acc:MGI:104680]
ENSMUST00000111159	lower	0.00109775	3.32141e-07	Akt3	thymoma viral proto-oncogene 3 Gene [Source:MGI Symbol;Acc:MGI:1345147]
ENSMUST00000114533	lower	0.00109775	3.32141e-07	Slc4a1ap	solute carrier family 4 (anion exchanger), member 1, adaptor protein Gene [Source:MGI Symbol;Acc:MGI:1196608]
ENSMUST00000054444	lower	0.00089836	3.48699e-07	Rpl18-ps2	ribosomal protein L18, pseudogene 2 Pseudogene [Source:MGI Symbol;Acc:MGI:3646997]
ENSMUST00000112847	lower	0.00089836	3.48699e-07	Mapk10	mitogen-activated protein kinase 10 Gene [Source:MGI Symbol;Acc:MGI:1346863]
ENSMUST00000025270	higher	0.0233231	3.62961e-07	Riok3	RIO kinase 3 (yeast) Gene [Source:MGI Symbol;Acc:MGI:1914128]
ENSMUST00000090925	higher	0.0233231	3.62961e-07	Baz2b	bromodomain adjacent to zinc finger domain, 2B Gene [Source:MGI Symbol;Acc:MGI:2442782]
ENSMUST00000098958	higher	0.0233231	3.62961e-07	Gm7381	predicted gene 7381 Pseudogene [Source:MGI Symbol;Acc:MGI:3643743]
ENSMUST00000019649	lower	0.0331352	3.76001e-07	Ubb	ubiquitin B Gene [Source:MGI Symbol;Acc:MGI:98888]
ENSMUST00000088811	higher	0.00441402	3.82215e-07	Zfp160	zinc finger protein 160 Gene [Source:MGI Symbol;Acc:MGI:108187]
ENSMUST00000034030	lower	0.000422537	3.85653e-07	Tmem184c	transmembrane protein 184C Gene [Source:MGI Symbol;Acc:MGI:2384562]
ENSMUST00000081506	lower	0.00292852	3.8895e-07	Scoc	short coiled-coil protein Gene [Source:MGI Symbol;Acc:MGI:1927654]
ENSMUST00000090359	lower	0.0010972	4.14642e-07	Slmap	sarcolemma associated protein Gene [Source:MGI Symbol;Acc:MGI:1933549]
ENSMUST00000089562	higher	0.0115947	4.25421e-07	NA	NA
ENSMUST00000100152	lower	0.0018023	4.29336e-07	NA	NA
ENSMUST00000120418	lower	0.0018023	4.29336e-07	Gm13436	predicted gene 13436 Pseudogene [Source:MGI Symbol;Acc:MGI:3651005]
ENSMUST00000072249	higher	2.17252e-05	4.47768e-07	Cdv3	carnitine deficiency-associated gene expressed in ventricle 3 Gene [Source:MGI Symbol;Acc:MGI:2448759]
ENSMUST00000120637	higher	0.0001233	4.68504e-07	Gm13121	predicted gene 13121 Pseudogene [Source:MGI Symbol;Acc:MGI:3650486]
ENSMUST00000023564	higher	0.000393718	4.8382e-07	Tra2b	transformer 2 beta homolog (Drosophila) Gene [Source:MGI Symbol;Acc:MGI:106016]
ENSMUST00000069174	higher	0.000393718	4.8382e-07	Trim23	tripartite motif-containing 23 Gene [Source:MGI Symbol;Acc:MGI:1933161]
ENSMUST00000090840	higher	0.000393718	4.8382e-07	Zrsr2	zinc finger (CCCH type), RNA binding motif and serine/arginine rich 2 Gene [Source:MGI Symbol;Acc:MGI:103287]
ENSMUST00000008633	lower	0.000158549	4.92461e-07	Elavl2	ELAV (embryonic lethal, abnormal vision, Drosophila)-like 2 (Hu antigen B) Gene [Source:MGI Symbol;Acc:MGI:1100887]
ENSMUST00000049389	lower	0.000158549	4.92461e-07	Zdhhc2	zinc finger, DHHC domain containing 2 Gene [Source:MGI Symbol;Acc:MGI:1923452]
ENSMUST00000049932	lower	0.000158549	4.92461e-07	Creb1	cAMP responsive element binding protein 1 Gene [Source:MGI Symbol;Acc:MGI:88494]
ENSMUST00000052248	lower	0.000158549	4.92461e-07	Eef1g	eukaryotic translation elongation factor 1 gamma Gene [Source:MGI Symbol;Acc:MGI:1914410]
ENSMUST00000099807	lower	0.000158549	4.92461e-07	Prdx5	peroxiredoxin 5 Gene [Source:MGI Symbol;Acc:MGI:1859821]
ENSMUST00000109493	lower	0.000158549	4.92461e-07	Homer1	homer homolog 1 (Drosophila) Gene [Source:MGI Symbol;Acc:MGI:1347345]
ENSMUST00000111046	lower	0.000158549	4.92461e-07	Bdnf	brain derived neurotrophic factor Gene [Source:MGI Symbol;Acc:MGI:88145]
ENSMUST00000114020	lower	0.000158549	4.92461e-07	Rexo4	REX4, RNA exonuclease 4 homolog (S. cerevisiae) Gene [Source:MGI Symbol;Acc:MGI:2684957]
ENSMUST00000114936	lower	0.000158549	4.92461e-07	Slc25a14	solute carrier family 25 (mitochondrial carrier, brain), member 14 Gene [Source:MGI Symbol;Acc:MGI:1330823]
ENSMUST00000071402	lower	0.000138793	4.9822e-07	Elovl6	ELOVL family member 6, elongation of long chain fatty acids (yeast) Gene [Source:MGI Symbol;Acc:MGI:2156528]
ENSMUST00000093350	lower	0.000138793	4.9822e-07	Ogdh	oxoglutarate dehydrogenase (lipoamide) Gene [Source:MGI Symbol;Acc:MGI:1098267]
ENSMUST00000100085	lower	0.000138793	4.9822e-07	Acvr1c	activin A receptor, type IC Gene [Source:MGI Symbol;Acc:MGI:2661081]
ENSMUST00000101554	lower	0.000138793	4.9822e-07	Ogdh	oxoglutarate dehydrogenase (lipoamide) Gene [Source:MGI Symbol;Acc:MGI:1098267]
ENSMUST00000102722	lower	0.000138793	4.9822e-07	Elavl4	ELAV (embryonic lethal, abnormal vision, Drosophila)-like 4 (Hu antigen D) Gene [Source:MGI Symbol;Acc:MGI:107427]
ENSMUST00000117354	lower	0.000138793	4.9822e-07	l7Rn6	lethal, Chr 7, Rinchik 6 Gene [Source:MGI Symbol;Acc:MGI:96738]
ENSMUST00000027214	higher	0.0001233	5.06693e-07	Ercc5	excision repair cross-complementing rodent repair deficiency, complementation group 5 Gene [Source:MGI Symbol;Acc:MGI:103582]
ENSMUST00000072040	higher	0.0001233	5.06693e-07	Vrk1	vaccinia related kinase 1 Gene [Source:MGI Symbol;Acc:MGI:1261847]
ENSMUST00000119953	higher	0.0001233	5.06693e-07	Rsl1d1	ribosomal L1 domain containing 1 Gene [Source:MGI Symbol;Acc:MGI:1913659]
ENSMUST00000073792	lower	2.76228e-05	5.23956e-07	Mon2	MON2 homolog (yeast) Gene [Source:MGI Symbol;Acc:MGI:1914324]
ENSMUST00000018718	lower	6.45956e-05	5.34712e-07	Acadvl	acyl-Coenzyme A dehydrogenase, very long chain Gene [Source:MGI Symbol;Acc:MGI:895149]
ENSMUST00000019854	lower	6.45956e-05	5.34712e-07	Mrpl24	mitochondrial ribosomal protein L24 Gene [Source:MGI Symbol;Acc:MGI:1914957]
ENSMUST00000060895	lower	6.45956e-05	5.34712e-07	Ugp2	UDP-glucose pyrophosphorylase 2 Gene [Source:MGI Symbol;Acc:MGI:2183447]
ENSMUST00000110690	lower	6.45956e-05	5.34712e-07	Oxct1	3-oxoacid CoA transferase 1 Gene [Source:MGI Symbol;Acc:MGI:1914291]
ENSMUST00000054666	higher	0.000437774	5.37957e-07	Cirbp	cold inducible RNA binding protein Gene [Source:MGI Symbol;Acc:MGI:893588]
ENSMUST00000114886	higher	0.000437774	5.37957e-07	Nudt3	nudix (nucleotide diphosphate linked moiety X)-type motif 3 Gene [Source:MGI Symbol;Acc:MGI:1928484]
ENSMUST00000119987	higher	0.000437774	5.37957e-07	BC022960	cDNA sequence BC022960 Pseudogene [Source:MGI Symbol;Acc:MGI:2670977]
ENSMUST00000027097	lower	3.00681e-05	5.44149e-07	Creb1	cAMP responsive element binding protein 1 Gene [Source:MGI Symbol;Acc:MGI:88494]
ENSMUST00000118388	lower	3.00681e-05	5.44149e-07	Gm14270	predicted gene 14270 Pseudogene [Source:MGI Symbol;Acc:MGI:3649849]
ENSMUST00000117588	higher	0.003969	5.49658e-07	Hfm1	HFM1, ATP-dependent DNA helicase homolog (S. cerevisiae) Gene [Source:MGI Symbol;Acc:MGI:3036246]
ENSMUST00000001480	lower	0.00169933	5.60839e-07	Npepps	aminopeptidase puromycin sensitive Gene [Source:MGI Symbol;Acc:MGI:1101358]
ENSMUST00000029727	lower	0.00169933	5.60839e-07	Fbxw7	F-box and WD-40 domain protein 7 Gene [Source:MGI Symbol;Acc:MGI:1354695]
ENSMUST00000057330	lower	0.00169933	5.60839e-07	Kif3a	kinesin family member 3A Gene [Source:MGI Symbol;Acc:MGI:107689]
ENSMUST00000076595	lower	0.00169933	5.60839e-07	Gm6421	predicted pseudogene 6421 Pseudogene [Source:MGI Symbol;Acc:MGI:3647311]
ENSMUST00000085917	lower	0.00169933	5.60839e-07	Akt2	thymoma viral proto-oncogene 2 Gene [Source:MGI Symbol;Acc:MGI:104874]
ENSMUST00000086854	lower	0.00169933	5.60839e-07	Mapk10	mitogen-activated protein kinase 10 Gene [Source:MGI Symbol;Acc:MGI:1346863]
ENSMUST00000112617	lower	0.00169933	5.60839e-07	Hsd17b10	hydroxysteroid (17-beta) dehydrogenase 10 Gene [Source:MGI Symbol;Acc:MGI:1333871]
ENSMUST00000022494	lower	0.00215078	5.83322e-07	Ebpl	emopamil binding protein-like Gene [Source:MGI Symbol;Acc:MGI:1915427]
ENSMUST00000034276	lower	0.00215078	5.83322e-07	Cox4i1	cytochrome c oxidase subunit IV isoform 1 Gene [Source:MGI Symbol;Acc:MGI:88473]
ENSMUST00000052245	lower	0.00215078	5.83322e-07	Ankrd45	ankyrin repeat domain 45 Gene [Source:MGI Symbol;Acc:MGI:1921094]
ENSMUST00000079901	lower	0.00215078	5.83322e-07	Trps1	trichorhinophalangeal syndrome I (human) Gene [Source:MGI Symbol;Acc:MGI:1927616]
ENSMUST00000110802	lower	0.00215078	5.83322e-07	Ndufaf1	NADH dehydrogenase (ubiquinone) 1 alpha subcomplex, assembly factor 1 Gene [Source:MGI Symbol;Acc:MGI:1916952]
ENSMUST00000111964	higher	0.000653004	5.98941e-07	Hnrnpa3	heterogeneous nuclear ribonucleoprotein A3 Gene [Source:MGI Symbol;Acc:MGI:1917171]
ENSMUST00000049849	higher	0.00131427	6.52872e-07	Pfkfb3	6-phosphofructo-2-kinase/fructose-2,6-biphosphatase 3 Gene [Source:MGI Symbol;Acc:MGI:2181202]
ENSMUST00000122231	higher	0.00131427	6.52872e-07	Rufy2	RUN and FYVE domain-containing 2 Gene [Source:MGI Symbol;Acc:MGI:1917682]
ENSMUST00000101309	lower	0.0109421	6.76181e-07	NA	NA
ENSMUST00000100327	higher	0.00357258	6.85431e-07	Rbm26	RNA binding motif protein 26 Gene [Source:MGI Symbol;Acc:MGI:1921463]
ENSMUST00000019638	lower	0.00475462	6.91071e-07	Cops6	COP9 (constitutive photomorphogenic) homolog, subunit 6 (Arabidopsis thaliana) Gene [Source:MGI Symbol;Acc:MGI:1349439]
ENSMUST00000034632	lower	0.00475462	6.91071e-07	Tmem218	transmembrane protein 218 Gene [Source:MGI Symbol;Acc:MGI:1913529]
ENSMUST00000040824	lower	0.00475462	6.91071e-07	Dpm3	dolichyl-phosphate mannosyltransferase polypeptide 3 Gene [Source:MGI Symbol;Acc:MGI:1915813]
ENSMUST00000062640	lower	0.00475462	6.91071e-07	Gm4798	predicted pseudogene 4798 Pseudogene [Source:MGI Symbol;Acc:MGI:3644096]
ENSMUST00000090488	lower	0.00475462	6.91071e-07	Gm10250	predicted pseudogene 10250 Pseudogene [Source:MGI Symbol;Acc:MGI:3642408]
ENSMUST00000108857	lower	0.00475462	6.91071e-07	Atox1	ATX1 (antioxidant protein 1) homolog 1 (yeast) Gene [Source:MGI Symbol;Acc:MGI:1333855]
ENSMUST00000097400	higher	1.90394e-05	6.95311e-07	Gm3417	predicted gene 3417 Gene [Source:MGI Symbol;Acc:MGI:3781595]
ENSMUST00000113536	higher	1.90394e-05	6.95311e-07	Fip1l1	FIP1 like 1 (S. cerevisiae) Gene [Source:MGI Symbol;Acc:MGI:1914149]
ENSMUST00000030010	higher	0.00112454	7.09392e-07	Abca1	ATP-binding cassette, sub-family A (ABC1), member 1 Gene [Source:MGI Symbol;Acc:MGI:99607]
ENSMUST00000116517	higher	0.00112454	7.09392e-07	Cdv3	carnitine deficiency-associated gene expressed in ventricle 3 Gene [Source:MGI Symbol;Acc:MGI:2448759]
ENSMUST00000015498	higher	0.000433606	7.17896e-07	Pcolce2	procollagen C-endopeptidase enhancer 2 Gene [Source:MGI Symbol;Acc:MGI:1923727]
ENSMUST00000025217	higher	0.000433606	7.17896e-07	Hspa9	heat shock protein 9 Gene [Source:MGI Symbol;Acc:MGI:96245]
ENSMUST00000031391	higher	0.000433606	7.17896e-07	Bcl7a	B-cell CLL/lymphoma 7A Gene [Source:MGI Symbol;Acc:MGI:1924295]
ENSMUST00000058880	higher	0.00010869	7.24617e-07	Tfpt	TCF3 (E2A) fusion partner Gene [Source:MGI Symbol;Acc:MGI:1916964]
ENSMUST00000107853	higher	0.00010869	7.24617e-07	Mbtd1	mbt domain containing 1 Gene [Source:MGI Symbol;Acc:MGI:2143977]
ENSMUST00000108643	higher	0.00010869	7.24617e-07	Tfpt	TCF3 (E2A) fusion partner Gene [Source:MGI Symbol;Acc:MGI:1916964]
ENSMUST00000112751	lower	0.000252043	7.62045e-07	Bcl2	B-cell leukemia/lymphoma 2 Gene [Source:MGI Symbol;Acc:MGI:88138]
ENSMUST00000095767	lower	9.80318e-05	7.78587e-07	Etv1	ets variant gene 1 Gene [Source:MGI Symbol;Acc:MGI:99254]
ENSMUST00000028624	lower	6.45956e-05	8.29974e-07	Gatm	glycine amidinotransferase (L-arginine:glycine amidinotransferase) Gene [Source:MGI Symbol;Acc:MGI:1914342]
ENSMUST00000043937	lower	6.45956e-05	8.29974e-07	Ostc	oligosaccharyltransferase complex subunit Gene [Source:MGI Symbol;Acc:MGI:1913607]
ENSMUST00000068542	lower	6.45956e-05	8.29974e-07	NA	NA
ENSMUST00000069533	lower	6.45956e-05	8.29974e-07	Cap1	CAP, adenylate cyclase-associated protein 1 (yeast) Gene [Source:MGI Symbol;Acc:MGI:88262]
ENSMUST00000100285	lower	6.45956e-05	8.29974e-07	Hmgcs1	3-hydroxy-3-methylglutaryl-Coenzyme A synthase 1 Gene [Source:MGI Symbol;Acc:MGI:107592]
ENSMUST00000112117	lower	6.45956e-05	8.29974e-07	Hmgcs1	3-hydroxy-3-methylglutaryl-Coenzyme A synthase 1 Gene [Source:MGI Symbol;Acc:MGI:107592]
ENSMUST00000020964	lower	0.000641874	8.48652e-07	Fkbp1b	FK506 binding protein 1b Gene [Source:MGI Symbol;Acc:MGI:1336205]
ENSMUST00000064091	lower	0.000641874	8.48652e-07	Ptpn4	protein tyrosine phosphatase, non-receptor type 4 Gene [Source:MGI Symbol;Acc:MGI:1099792]
ENSMUST00000119227	lower	0.000641874	8.48652e-07	2900010M23Rik	RIKEN cDNA 2900010M23 gene Gene [Source:MGI Symbol;Acc:MGI:1914517]
ENSMUST00000062093	lower	0.000252043	9.04752e-07	Mrpl48	mitochondrial ribosomal protein L48 Gene [Source:MGI Symbol;Acc:MGI:1289321]
ENSMUST00000081894	lower	0.000252043	9.04752e-07	Ogdh	oxoglutarate dehydrogenase (lipoamide) Gene [Source:MGI Symbol;Acc:MGI:1098267]
ENSMUST00000107053	lower	0.000252043	9.04752e-07	Mrpl48	mitochondrial ribosomal protein L48 Gene [Source:MGI Symbol;Acc:MGI:1289321]
ENSMUST00000062167	higher	5.47014e-05	9.14654e-07	NA	NA
ENSMUST00000020251	lower	0.000641874	9.23597e-07	Gnptab	N-acetylglucosamine-1-phosphate transferase, alpha and beta subunits Gene [Source:MGI Symbol;Acc:MGI:3643902]
ENSMUST00000053748	lower	0.000641874	9.23597e-07	Epb4.1l2	erythrocyte protein band 4.1-like 2 Gene [Source:MGI Symbol;Acc:MGI:103009]
ENSMUST00000097453	lower	0.000641874	9.23597e-07	Cdc42bpa	CDC42 binding protein kinase alpha Gene [Source:MGI Symbol;Acc:MGI:2441841]
ENSMUST00000087366	lower	3.00332e-05	9.61693e-07	Creb1	cAMP responsive element binding protein 1 Gene [Source:MGI Symbol;Acc:MGI:88494]
ENSMUST00000002551	higher	0.00340233	9.88663e-07	Snrpd1	small nuclear ribonucleoprotein D1 Gene [Source:MGI Symbol;Acc:MGI:98344]
ENSMUST00000016977	higher	0.00340233	9.88663e-07	Mrps18c	mitochondrial ribosomal protein S18C Gene [Source:MGI Symbol;Acc:MGI:1915985]
ENSMUST00000027444	lower	0.0018023	9.97297e-07	Pde6d	phosphodiesterase 6D, cGMP-specific, rod, delta Gene [Source:MGI Symbol;Acc:MGI:1270843]
ENSMUST00000114323	lower	0.0018023	9.97297e-07	Kbtbd2	kelch repeat and BTB (POZ) domain containing 2 Gene [Source:MGI Symbol;Acc:MGI:2384811]
