# Supplementary material for: Neuroglobin-Deficiency Exacerbates Hif1A and c-FOS Response, but Does Not Affect Neuronal Survival during Severe Hypoxia In Vivo
Source: PLoS One. 2011 Dec 2;6(12):e28160. doi: 10.1371/journal.pone.0028160 (PMC3229544; doi:10.1371/journal.pone.0028160)
Supplement: Table S10 — Transcripts with consistent differential expression between wt and Ngb-null mice at 90 minutes and at 24 hours after the onset of hypoxia, but not during normoxia. (XLS) [file pone.0028160.s011.xls]

## Sheet: Consistent_diff_expression
Transcript ID (Ensembl)	Differential expression	Q&T	T	Q	p-value	Gene symbol	Description
ENSMUST00000071087	higher	13	122	1378	4.45112e-11	Cspp1	centrosome and spindle pole associated protein 1 Gene [Source:MGI Symbol;Acc:MGI:2681832]
ENSMUST00000020957	higher	5	6	1378	1.06799e-08	Adi1	acireductone dioxygenase 1 Gene [Source:MGI Symbol;Acc:MGI:2144929]
ENSMUST00000091367	lower	6	15	1414	1.02558e-07	Ubc	ubiquitin C Gene [Source:MGI Symbol;Acc:MGI:98889]
ENSMUST00000086519	lower	6	30	1414	5.72925e-06	Rplp0	ribosomal protein, large, P0 Gene [Source:MGI Symbol;Acc:MGI:1927636]
ENSMUST00000066652	lower	4	12	1414	0.000117049	Kidins220	kinase D-interacting substrate 220 Gene [Source:MGI Symbol;Acc:MGI:1924730]
ENSMUST00000111857	lower	4	12	1414	0.000117049	Rgl1	ral guanine nucleotide dissociation stimulator,-like 1 Gene [Source:MGI Symbol;Acc:MGI:107484]
ENSMUST00000111388	lower	4	13	1414	0.000134752	Gm1821	predicted gene 1821 Pseudogene [Source:MGI Symbol;Acc:MGI:3037679]
ENSMUST00000120197	lower	4	14	1414	0.000156624	Gm12502	predicted gene 12502 Pseudogene [Source:MGI Symbol;Acc:MGI:3650307]
ENSMUST00000112334	lower	4	15	1414	0.000182384	Reps2	RALBP1 associated Eps domain containing protein 2 Gene [Source:MGI Symbol;Acc:MGI:2663511]
ENSMUST00000111859	lower	4	17	1414	0.00027618	Rgl1	ral guanine nucleotide dissociation stimulator,-like 1 Gene [Source:MGI Symbol;Acc:MGI:107484]
ENSMUST00000121456	lower	4	18	1414	0.000296535	Gm14165	predicted gene 14165 Pseudogene [Source:MGI Symbol;Acc:MGI:3650537]
ENSMUST00000081665	lower	5	41	1414	0.000296535	Gm5561	predicted gene 5561 Pseudogene [Source:MGI Symbol;Acc:MGI:3804971]
ENSMUST00000021850	higher	4	15	1378	0.000343221	Prpf4b	PRP4 pre-mRNA processing factor 4 homolog B (yeast) Gene [Source:MGI Symbol;Acc:MGI:109584]
ENSMUST00000118642	lower	4	20	1414	0.000404334	Gm7331	predicted gene 7331 Pseudogene [Source:MGI Symbol;Acc:MGI:3644702]
ENSMUST00000106540	higher	4	18	1378	0.000570796	Amy1	amylase 1, salivary Gene [Source:MGI Symbol;Acc:MGI:88019]
ENSMUST00000056398	higher	3	6	1378	0.000682565	Naa38	N(alpha)-acetyltransferase 38, NatC auxiliary subunit Gene [Source:MGI Symbol;Acc:MGI:1923772]
ENSMUST00000074513	lower	5	52	1414	0.000821203	Gm15454	predicted gene 15454 Pseudogene [Source:MGI Symbol;Acc:MGI:3644262]
ENSMUST00000110933	lower	3	9	1414	0.0012162	Kidins220	kinase D-interacting substrate 220 Gene [Source:MGI Symbol;Acc:MGI:1924730]
ENSMUST00000081940	lower	4	28	1414	0.0012162	Uba52	ubiquitin A-52 residue ribosomal protein fusion product 1 Gene [Source:MGI Symbol;Acc:MGI:98887]
ENSMUST00000057151	lower	3	9	1414	0.0012162	Tmem18	transmembrane protein 18 Gene [Source:MGI Symbol;Acc:MGI:2387176]
ENSMUST00000098595	lower	3	10	1414	0.00135645	Gm10644	predicted gene 10644 Gene [Source:MGI Symbol;Acc:MGI:3704314]
ENSMUST00000110935	lower	3	10	1414	0.00135645	Kidins220	kinase D-interacting substrate 220 Gene [Source:MGI Symbol;Acc:MGI:1924730]
ENSMUST00000107505	lower	3	10	1414	0.00135645	Syt11	synaptotagmin XI Gene [Source:MGI Symbol;Acc:MGI:1859547]
ENSMUST00000121623	lower	4	32	1414	0.00166135	2810422J05Rik	RIKEN cDNA 2810422J05 gene Gene [Source:MGI Symbol;Acc:MGI:1922870]
ENSMUST00000101102	lower	3	11	1414	0.00167273	Reps2	RALBP1 associated Eps domain containing protein 2 Gene [Source:MGI Symbol;Acc:MGI:2663511]
ENSMUST00000087141	lower	2	2	1414	0.00212314	Mtap7d2	MAP7 domain containing 2 Gene [Source:MGI Symbol;Acc:MGI:1917474]
ENSMUST00000101379	lower	3	13	1414	0.00261741	Mdga2	MAM domain containing glycosylphosphatidylinositol anchor 2 Gene [Source:MGI Symbol;Acc:MGI:2444706]
ENSMUST00000078673	higher	3	12	1378	0.00334356	Samd12	sterile alpha motif domain containing 12 Gene [Source:MGI Symbol;Acc:MGI:2444518]
ENSMUST00000044746	higher	3	12	1378	0.00334356	Mterf	mitochondrial transcription termination factor Gene [Source:MGI Symbol;Acc:MGI:1918240]
ENSMUST00000033999	higher	3	12	1378	0.00334356	Frg1	FSHD region gene 1 Gene [Source:MGI Symbol;Acc:MGI:893597]
ENSMUST00000065462	higher	3	11	1378	0.00334356	Gm9897	predicted gene 9897 Gene [Source:MGI Symbol;Acc:MGI:3704243]
ENSMUST00000058187	higher	3	10	1378	0.00334356	NA	NA
ENSMUST00000034085	higher	3	11	1378	0.00334356	Brd7	bromodomain containing 7 Gene [Source:MGI Symbol;Acc:MGI:1349766]
ENSMUST00000074163	higher	3	13	1378	0.00340357	Cys1	cystin 1 Gene [Source:MGI Symbol;Acc:MGI:2177632]
ENSMUST00000119052	higher	3	13	1378	0.00340357	Gm11196	predicted gene 11196 Pseudogene [Source:MGI Symbol;Acc:MGI:3649463]
ENSMUST00000094946	higher	3	13	1378	0.00340357	Gm10471	predicted gene 10471 Gene [Source:MGI Symbol;Acc:MGI:3641900]
ENSMUST00000027451	lower	3	16	1414	0.00464881	Epha4	Eph receptor A4 Gene [Source:MGI Symbol;Acc:MGI:98277]
ENSMUST00000036493	lower	3	16	1414	0.00464881	Atp1a1	ATPase, Na+/K+ transporting, alpha 1 polypeptide Gene [Source:MGI Symbol;Acc:MGI:88105]
ENSMUST00000112601	lower	3	17	1414	0.00540024	Acvr1	activin A receptor, type 1 Gene [Source:MGI Symbol;Acc:MGI:87911]
ENSMUST00000056162	lower	3	18	1414	0.00597931	NA	NA
ENSMUST00000119458	lower	3	18	1414	0.00597931	Gm5943	predicted pseudogene 5943 Pseudogene [Source:MGI Symbol;Acc:MGI:3646004]
ENSMUST00000121811	lower	3	19	1414	0.00658765	Gm6881	predicted gene 6881 Pseudogene [Source:MGI Symbol;Acc:MGI:3647481]
ENSMUST00000071965	lower	3	19	1414	0.00658765	Gm7808	predicted pseudogene 7808 Pseudogene [Source:MGI Symbol;Acc:MGI:3643360]
ENSMUST00000105839	higher	2	3	1378	0.00754226	Usp48	ubiquitin specific peptidase 48 Gene [Source:MGI Symbol;Acc:MGI:2158502]
ENSMUST00000062740	higher	3	18	1378	0.00835327	Acp1	acid phosphatase 1, soluble Gene [Source:MGI Symbol;Acc:MGI:87881]
ENSMUST00000020974	lower	2	4	1414	0.00857581	Id2	inhibitor of DNA binding 2 Gene [Source:MGI Symbol;Acc:MGI:96397]
ENSMUST00000099086	lower	3	21	1414	0.00857581	Gm8325	predicted pseudogene 8325 Pseudogene [Source:MGI Symbol;Acc:MGI:3644852]
ENSMUST00000043757	higher	3	19	1378	0.00878733	Abcf1	ATP-binding cassette, sub-family F (GCN20), member 1 Gene [Source:MGI Symbol;Acc:MGI:1351658]
ENSMUST00000074038	higher	3	19	1378	0.00878733	Acp1	acid phosphatase 1, soluble Gene [Source:MGI Symbol;Acc:MGI:87881]
ENSMUST00000109207	lower	3	22	1414	0.00938899	Ube2v1	ubiquitin-conjugating enzyme E2 variant 1 Gene [Source:MGI Symbol;Acc:MGI:1913839]
ENSMUST00000054014	higher	3	20	1378	0.00976059	Ddx17	DEAD (Asp-Glu-Ala-Asp) box polypeptide 17 Gene [Source:MGI Symbol;Acc:MGI:1914290]
ENSMUST00000122291	higher	2	4	1378	0.0107419	Gm14813	predicted gene 14813 Pseudogene [Source:MGI Symbol;Acc:MGI:3705714]
ENSMUST00000113562	higher	3	21	1378	0.0107419	Fnbp1	formin binding protein 1 Gene [Source:MGI Symbol;Acc:MGI:109606]
ENSMUST00000113564	higher	3	22	1378	0.01131	Fnbp1	formin binding protein 1 Gene [Source:MGI Symbol;Acc:MGI:109606]
ENSMUST00000112735	higher	3	24	1378	0.0135333	Gm3358	predicted gene 3358 Pseudogene [Source:MGI Symbol;Acc:MGI:3781536]
ENSMUST00000112758	higher	3	24	1378	0.0135333	Gm3383	predicted gene 3383 Pseudogene [Source:MGI Symbol;Acc:MGI:3781561]
ENSMUST00000100524	higher	2	5	1378	0.0144164	Zfp157	zinc finger protein 157 Gene [Source:MGI Symbol;Acc:MGI:1919404]
ENSMUST00000118147	higher	2	5	1378	0.0144164	Gm15460	predicted gene 15460 Pseudogene [Source:MGI Symbol;Acc:MGI:3707338]
ENSMUST00000080030	higher	2	6	1378	0.018886	Gspt1	G1 to S phase transition 1 Gene [Source:MGI Symbol;Acc:MGI:1316728]
ENSMUST00000060084	higher	4	70	1378	0.018886	Dnajc13	DnaJ (Hsp40) homolog, subfamily C, member 13 Gene [Source:MGI Symbol;Acc:MGI:2676368]
ENSMUST00000120050	higher	2	6	1378	0.018886	Gm11800	predicted gene 11800 Pseudogene [Source:MGI Symbol;Acc:MGI:3650447]
ENSMUST00000030549	higher	2	6	1378	0.018886	NA	NA
ENSMUST00000118248	lower	3	28	1414	0.0189659	Gm14036	predicted gene 14036 Pseudogene [Source:MGI Symbol;Acc:MGI:3649581]
ENSMUST00000057503	lower	2	6	1414	0.0194262	6330527O06Rik	RIKEN cDNA 6330527O06 gene Gene [Source:MGI Symbol;Acc:MGI:1923411]
ENSMUST00000055242	lower	2	7	1414	0.0224831	Clptm1	cleft lip and palate associated transmembrane protein 1 Gene [Source:MGI Symbol;Acc:MGI:1927155]
ENSMUST00000024889	lower	2	7	1414	0.0224831	Pja2	praja 2, RING-H2 motif containing Gene [Source:MGI Symbol;Acc:MGI:2159342]
ENSMUST00000024888	lower	2	7	1414	0.0224831	Pja2	praja 2, RING-H2 motif containing Gene [Source:MGI Symbol;Acc:MGI:2159342]
ENSMUST00000035371	lower	2	7	1414	0.0224831	Sv2a	synaptic vesicle glycoprotein 2 a Gene [Source:MGI Symbol;Acc:MGI:1927139]
ENSMUST00000028025	lower	2	7	1414	0.0224831	NA	NA
ENSMUST00000093496	lower	3	31	1414	0.0224831	Gm10284	predicted pseudogene 10284 Pseudogene [Source:MGI Symbol;Acc:MGI:3704311]
ENSMUST00000090945	lower	2	7	1414	0.0224831	Syt11	synaptotagmin XI Gene [Source:MGI Symbol;Acc:MGI:1859547]
ENSMUST00000063243	higher	2	9	1378	0.0227575	Snrnp70	small nuclear ribonucleoprotein 70 (U1) Gene [Source:MGI Symbol;Acc:MGI:98341]
ENSMUST00000048229	higher	2	7	1378	0.0227575	Gm239	predicted gene 239 Gene [Source:MGI Symbol;Acc:MGI:2685085]
ENSMUST00000020004	higher	2	8	1378	0.0227575	Asf1a	ASF1 anti-silencing function 1 homolog A (S. cerevisiae) Gene [Source:MGI Symbol;Acc:MGI:1913653]
ENSMUST00000075390	higher	2	8	1378	0.0227575	Olfr1287	olfactory receptor 1287 Gene [Source:MGI Symbol;Acc:MGI:3031121]
ENSMUST00000105311	higher	2	10	1378	0.0227575	Gm10416	predicted pseudogene 10416 Pseudogene [Source:MGI Symbol;Acc:MGI:3645037]
ENSMUST00000030862	higher	2	8	1378	0.0227575	2610109H07Rik	RIKEN cDNA 2610109H07 gene Gene [Source:MGI Symbol;Acc:MGI:1917683]
ENSMUST00000099141	higher	2	10	1378	0.0227575	4930518I15Rik	RIKEN cDNA 4930518I15 gene Gene [Source:MGI Symbol;Acc:MGI:1921954]
ENSMUST00000112692	higher	2	10	1378	0.0227575	Rif1	Rap1 interacting factor 1 homolog (yeast) Gene [Source:MGI Symbol;Acc:MGI:1098622]
ENSMUST00000044879	higher	2	9	1378	0.0227575	Zfp738	zinc finger protein 738 Gene [Source:MGI Symbol;Acc:MGI:3040706]
ENSMUST00000121651	higher	2	9	1378	0.0227575	Chchd7	coiled-coil-helix-coiled-coil-helix domain containing 7 Gene [Source:MGI Symbol;Acc:MGI:1913683]
ENSMUST00000003762	higher	2	10	1378	0.0227575	Has1	hyaluronan synthase1 Gene [Source:MGI Symbol;Acc:MGI:106590]
ENSMUST00000117319	higher	2	8	1378	0.0227575	Slc4a1ap	solute carrier family 4 (anion exchanger), member 1, adaptor protein Gene [Source:MGI Symbol;Acc:MGI:1196608]
ENSMUST00000041122	higher	2	9	1378	0.0227575	Chchd7	coiled-coil-helix-coiled-coil-helix domain containing 7 Gene [Source:MGI Symbol;Acc:MGI:1913683]
ENSMUST00000121087	higher	2	10	1378	0.0227575	Gm7308	predicted pseudogene 7308 Pseudogene [Source:MGI Symbol;Acc:MGI:3644558]
ENSMUST00000112588	higher	2	10	1378	0.0227575	Kdm5c	lysine (K)-specific demethylase 5C Gene [Source:MGI Symbol;Acc:MGI:99781]
ENSMUST00000108386	higher	2	7	1378	0.0227575	Chchd7	coiled-coil-helix-coiled-coil-helix domain containing 7 Gene [Source:MGI Symbol;Acc:MGI:1913683]
ENSMUST00000081580	higher	2	7	1378	0.0227575	Gm5089	predicted gene 5089 Gene [Source:MGI Symbol;Acc:MGI:3644731]
ENSMUST00000021438	higher	2	9	1378	0.0227575	Nova1	neuro-oncological ventral antigen 1 Gene [Source:MGI Symbol;Acc:MGI:104297]
ENSMUST00000114775	higher	2	10	1378	0.0227575	Stxbp5l	syntaxin binding protein 5-like Gene [Source:MGI Symbol;Acc:MGI:2443815]
ENSMUST00000034832	higher	2	10	1378	0.0227575	Ptpn9	protein tyrosine phosphatase, non-receptor type 9 Gene [Source:MGI Symbol;Acc:MGI:1928376]
ENSMUST00000106362	higher	2	8	1378	0.0227575	NA	NA
ENSMUST00000056715	higher	2	8	1378	0.0227575	Mkl2	MKL/myocardin-like 2 Gene [Source:MGI Symbol;Acc:MGI:3050795]
ENSMUST00000059031	higher	2	10	1378	0.0227575	D14Abb1e	DNA segment, Chr 14, Abbott 1 expressed Gene [Source:MGI Symbol;Acc:MGI:1921694]
ENSMUST00000099226	higher	2	9	1378	0.0227575	NA	NA
ENSMUST00000033541	higher	2	10	1378	0.0227575	Fundc2	FUN14 domain containing 2 Gene [Source:MGI Symbol;Acc:MGI:1914641]
ENSMUST00000077853	higher	2	9	1378	0.0227575	Prpf4b	PRP4 pre-mRNA processing factor 4 homolog B (yeast) Gene [Source:MGI Symbol;Acc:MGI:109584]
ENSMUST00000097809	higher	2	9	1378	0.0227575	Rims1	regulating synaptic membrane exocytosis 1 Gene [Source:MGI Symbol;Acc:MGI:2152971]
ENSMUST00000025749	higher	2	10	1378	0.0227575	Rps6kb2	ribosomal protein S6 kinase, polypeptide 2 Gene [Source:MGI Symbol;Acc:MGI:1927343]
ENSMUST00000084892	higher	2	10	1378	0.0227575	Dpy19l4	dpy-19-like 4 (C. elegans) Gene [Source:MGI Symbol;Acc:MGI:2685869]
ENSMUST00000119307	higher	2	9	1378	0.0227575	Chchd7	coiled-coil-helix-coiled-coil-helix domain containing 7 Gene [Source:MGI Symbol;Acc:MGI:1913683]
ENSMUST00000029140	higher	2	8	1378	0.0227575	Procr	protein C receptor, endothelial Gene [Source:MGI Symbol;Acc:MGI:104596]
ENSMUST00000048604	higher	2	9	1378	0.0227575	BC024479	cDNA sequence BC024479 Gene [Source:MGI Symbol;Acc:MGI:2384579]
ENSMUST00000106318	higher	3	38	1378	0.0227575	Ppih	peptidyl prolyl isomerase H Gene [Source:MGI Symbol;Acc:MGI:106499]
ENSMUST00000069168	higher	2	9	1378	0.0227575	Cpsf6	cleavage and polyadenylation specific factor 6 Gene [Source:MGI Symbol;Acc:MGI:1913948]
ENSMUST00000055131	higher	2	7	1378	0.0227575	Usp48	ubiquitin specific peptidase 48 Gene [Source:MGI Symbol;Acc:MGI:2158502]
ENSMUST00000052130	higher	2	9	1378	0.0227575	Gjb1	gap junction protein, beta 1 Gene [Source:MGI Symbol;Acc:MGI:95719]
ENSMUST00000022450	higher	2	9	1378	0.0227575	D14Abb1e	DNA segment, Chr 14, Abbott 1 expressed Gene [Source:MGI Symbol;Acc:MGI:1921694]
ENSMUST00000079855	higher	2	8	1378	0.0227575	Hpvc-ps	human papillomavirus 18 E5 central sequence motif, pseudogene Pseudogene [Source:MGI Symbol;Acc:MGI:109158]
ENSMUST00000120732	higher	2	10	1378	0.0227575	Chchd7	coiled-coil-helix-coiled-coil-helix domain containing 7 Gene [Source:MGI Symbol;Acc:MGI:1913683]
ENSMUST00000045180	higher	2	10	1378	0.0227575	Tardbp	TAR DNA binding protein Gene [Source:MGI Symbol;Acc:MGI:2387629]
ENSMUST00000072719	higher	2	10	1378	0.0227575	NA	NA
ENSMUST00000067167	higher	2	10	1378	0.0227575	5730455O13Rik	RIKEN cDNA 5730455O13 gene Gene [Source:MGI Symbol;Acc:MGI:1917817]
ENSMUST00000056458	higher	3	39	1378	0.0227575	Ppih	peptidyl prolyl isomerase H Gene [Source:MGI Symbol;Acc:MGI:106499]
ENSMUST00000053633	higher	2	11	1378	0.0246868	NA	NA
ENSMUST00000103055	higher	2	11	1378	0.0246868	Dido1	death inducer-obliterator 1 Gene [Source:MGI Symbol;Acc:MGI:1344352]
ENSMUST00000072765	higher	2	11	1378	0.0246868	Gm5528	predicted gene 5528 Gene [Source:MGI Symbol;Acc:MGI:3643453]
ENSMUST00000061767	higher	2	11	1378	0.0246868	Crebzf	CREB/ATF bZIP transcription factor Gene [Source:MGI Symbol;Acc:MGI:2675296]
ENSMUST00000107495	higher	2	11	1378	0.0246868	Tm2d3	TM2 domain containing 3 Gene [Source:MGI Symbol;Acc:MGI:1915884]
ENSMUST00000119929	higher	2	11	1378	0.0246868	Tmem41b	transmembrane protein 41B Gene [Source:MGI Symbol;Acc:MGI:1289225]
ENSMUST00000076314	higher	2	11	1378	0.0246868	Rpl21-ps1	ribosomal protein 21, pseudogene 1 Pseudogene [Source:MGI Symbol;Acc:MGI:3647596]
ENSMUST00000079866	higher	2	11	1378	0.0246868	Srsf1	serine/arginine-rich splicing factor 1 Gene [Source:MGI Symbol;Acc:MGI:98283]
ENSMUST00000029815	higher	2	11	1378	0.0246868	Cisd2	CDGSH iron sulfur domain 2 Gene [Source:MGI Symbol;Acc:MGI:1914256]
ENSMUST00000101432	higher	2	12	1378	0.0257641	Npas3	neuronal PAS domain protein 3 Gene [Source:MGI Symbol;Acc:MGI:1351610]
ENSMUST00000021018	higher	2	12	1378	0.0257641	Taf15	TAF15 RNA polymerase II, TATA box binding protein (TBP)-associated factor Gene [Source:MGI Symbol;Acc:MGI:1917689]
ENSMUST00000090647	higher	2	12	1378	0.0257641	Gm10128	predicted gene 10128 Pseudogene [Source:MGI Symbol;Acc:MGI:3704427]
ENSMUST00000112516	higher	2	12	1378	0.0257641	Ltbp1	latent transforming growth factor beta binding protein 1 Gene [Source:MGI Symbol;Acc:MGI:109151]
ENSMUST00000095940	higher	2	12	1378	0.0257641	Rpl21-ps5	ribosomal protein L21, pseudogene 5 Pseudogene [Source:MGI Symbol;Acc:MGI:3647087]
ENSMUST00000097810	higher	2	12	1378	0.0257641	Rims1	regulating synaptic membrane exocytosis 1 Gene [Source:MGI Symbol;Acc:MGI:2152971]
ENSMUST00000045907	higher	2	12	1378	0.0257641	2700049A03Rik	RIKEN cDNA 2700049A03 gene Gene [Source:MGI Symbol;Acc:MGI:1924217]
ENSMUST00000092837	higher	2	12	1378	0.0257641	Taf15	TAF15 RNA polymerase II, TATA box binding protein (TBP)-associated factor Gene [Source:MGI Symbol;Acc:MGI:1917689]
ENSMUST00000020652	higher	2	12	1378	0.0257641	NA	NA
ENSMUST00000100207	higher	2	12	1378	0.0257641	Fnbp1	formin binding protein 1 Gene [Source:MGI Symbol;Acc:MGI:109606]
ENSMUST00000073157	higher	2	12	1378	0.0257641	Zfp71-rs1	zinc finger protein 71, related sequence Gene [Source:MGI Symbol;Acc:MGI:107769]
ENSMUST00000117262	higher	2	12	1378	0.0257641	Slc4a1ap	solute carrier family 4 (anion exchanger), member 1, adaptor protein Gene [Source:MGI Symbol;Acc:MGI:1196608]
ENSMUST00000069794	higher	2	13	1378	0.0261789	Rif1	Rap1 interacting factor 1 homolog (yeast) Gene [Source:MGI Symbol;Acc:MGI:1098622]
ENSMUST00000097811	higher	2	13	1378	0.0261789	Rims1	regulating synaptic membrane exocytosis 1 Gene [Source:MGI Symbol;Acc:MGI:2152971]
ENSMUST00000107715	higher	2	13	1378	0.0261789	Invs	inversin Gene [Source:MGI Symbol;Acc:MGI:1335082]
ENSMUST00000112750	higher	2	13	1378	0.0261789	Gm3248	predicted gene 3248 Pseudogene [Source:MGI Symbol;Acc:MGI:3781426]
ENSMUST00000072292	higher	2	13	1378	0.0261789	Zfp280c	zinc finger protein 280C Gene [Source:MGI Symbol;Acc:MGI:2387585]
ENSMUST00000074148	higher	2	13	1378	0.0261789	Gm7361	predicted gene 7361 Gene [Source:MGI Symbol;Acc:MGI:3805965]
ENSMUST00000057216	higher	2	13	1378	0.0261789	Mtch2	mitochondrial carrier homolog 2 (C. elegans) Gene [Source:MGI Symbol;Acc:MGI:1929260]
ENSMUST00000119542	higher	2	13	1378	0.0261789	Gm15921	predicted gene 15921 Pseudogene [Source:MGI Symbol;Acc:MGI:3801933]
ENSMUST00000112693	higher	2	13	1378	0.0261789	Rif1	Rap1 interacting factor 1 homolog (yeast) Gene [Source:MGI Symbol;Acc:MGI:1098622]
ENSMUST00000112749	higher	2	13	1378	0.0261789	Gm3248	predicted gene 3248 Pseudogene [Source:MGI Symbol;Acc:MGI:3781426]
ENSMUST00000029433	higher	2	13	1378	0.0261789	Ptpn22	protein tyrosine phosphatase, non-receptor type 22 (lymphoid) Gene [Source:MGI Symbol;Acc:MGI:107170]
ENSMUST00000114533	higher	2	13	1378	0.0261789	Slc4a1ap	solute carrier family 4 (anion exchanger), member 1, adaptor protein Gene [Source:MGI Symbol;Acc:MGI:1196608]
ENSMUST00000027800	higher	2	13	1378	0.0261789	Tmem63a	transmembrane protein 63a Gene [Source:MGI Symbol;Acc:MGI:2384789]
ENSMUST00000005578	higher	3	48	1378	0.0261789	Cic	capicua homolog (Drosophila) Gene [Source:MGI Symbol;Acc:MGI:1918972]
ENSMUST00000051589	higher	2	13	1378	0.0261789	Aasdhppt	aminoadipate-semialdehyde dehydrogenase-phosphopantetheinyl transferase Gene [Source:MGI Symbol;Acc:MGI:1914868]
ENSMUST00000111552	higher	2	14	1378	0.0267662	Clip1	CAP-GLY domain containing linker protein 1 Gene [Source:MGI Symbol;Acc:MGI:1928401]
ENSMUST00000020500	higher	2	14	1378	0.0267662	Appl2	adaptor protein, phosphotyrosine interaction, PH domain and leucine zipper containing 2 Gene [Source:MGI Symbol;Acc:MGI:2384914]
ENSMUST00000095970	higher	2	14	1378	0.0267662	RP23-89F1.2	Alpha21-takusan [Source:UniProtKB/TrEMBL;Acc:A6NAT8]
ENSMUST00000090673	higher	2	14	1378	0.0267662	Gm10341	predicted gene 10341 Gene [Source:MGI Symbol;Acc:MGI:3704418]
ENSMUST00000098079	higher	2	14	1378	0.0267662	Rnf20	ring finger protein 20 Gene [Source:MGI Symbol;Acc:MGI:1925927]
ENSMUST00000081544	higher	2	14	1378	0.0267662	Rims1	regulating synaptic membrane exocytosis 1 Gene [Source:MGI Symbol;Acc:MGI:2152971]
ENSMUST00000090328	higher	2	14	1378	0.0267662	Olfr1280	olfactory receptor 1280 Gene [Source:MGI Symbol;Acc:MGI:3031114]
ENSMUST00000111470	higher	2	14	1378	0.0267662	NA	NA
ENSMUST00000107812	higher	2	14	1378	0.0267662	Ift80	intraflagellar transport 80 homolog (Chlamydomonas) Gene [Source:MGI Symbol;Acc:MGI:1915509]
ENSMUST00000113829	higher	2	14	1378	0.0267662	Brwd1	bromodomain and WD repeat domain containing 1 Gene [Source:MGI Symbol;Acc:MGI:1890651]
ENSMUST00000036450	higher	2	14	1378	0.0267662	Spg11	spastic paraplegia 11 Gene [Source:MGI Symbol;Acc:MGI:2444989]
ENSMUST00000073792	higher	2	14	1378	0.0267662	Mon2	MON2 homolog (yeast) Gene [Source:MGI Symbol;Acc:MGI:1914324]
ENSMUST00000106946	higher	2	14	1378	0.0267662	Ak4	adenylate kinase 4 Gene [Source:MGI Symbol;Acc:MGI:87979]
ENSMUST00000101381	higher	2	14	1378	0.0267662	Gm10462	predicted gene 10462 Gene [Source:MGI Symbol;Acc:MGI:3708549]
ENSMUST00000084965	higher	2	14	1378	0.0267662	NA	NA
ENSMUST00000085018	lower	2	8	1414	0.0278467	Ip6k2	inositol hexaphosphate kinase 2 Gene [Source:MGI Symbol;Acc:MGI:1923750]
ENSMUST00000073179	lower	2	8	1414	0.0278467	4933415F23Rik	RIKEN cDNA 4933415F23 gene Gene [Source:MGI Symbol;Acc:MGI:1914005]
ENSMUST00000033578	lower	2	8	1414	0.0278467	Magee1	melanoma antigen, family E, 1 Gene [Source:MGI Symbol;Acc:MGI:2148149]
ENSMUST00000077278	higher	2	15	1378	0.0295972	Rpl21-ps11	ribosomal protein L21, pseudogene 11 Pseudogene [Source:MGI Symbol;Acc:MGI:3648207]
ENSMUST00000115273	higher	2	15	1378	0.0295972	Rims1	regulating synaptic membrane exocytosis 1 Gene [Source:MGI Symbol;Acc:MGI:2152971]
ENSMUST00000121764	higher	2	15	1378	0.0295972	Gm15644	predicted gene 15644 Pseudogene [Source:MGI Symbol;Acc:MGI:3783088]
ENSMUST00000101438	higher	2	15	1378	0.0295972	Smek2	SMEK homolog 2, suppressor of mek1 (Dictyostelium) Gene [Source:MGI Symbol;Acc:MGI:2144474]
ENSMUST00000023526	higher	2	15	1378	0.0295972	Stxbp5l	syntaxin binding protein 5-like Gene [Source:MGI Symbol;Acc:MGI:2443815]
ENSMUST00000099113	lower	2	9	1414	0.0296307	Sirpa	signal-regulatory protein alpha Gene [Source:MGI Symbol;Acc:MGI:108563]
ENSMUST00000075069	lower	2	9	1414	0.0296307	Ntm	neurotrimin Gene [Source:MGI Symbol;Acc:MGI:2446259]
ENSMUST00000022629	lower	2	9	1414	0.0296307	Dpysl2	dihydropyrimidinase-like 2 Gene [Source:MGI Symbol;Acc:MGI:1349763]
ENSMUST00000022925	lower	2	9	1414	0.0296307	Eif3h	eukaryotic translation initiation factor 3, subunit H Gene [Source:MGI Symbol;Acc:MGI:1915385]
ENSMUST00000021523	lower	2	9	1414	0.0296307	Mnat1	menage a trois 1 Gene [Source:MGI Symbol;Acc:MGI:106207]
ENSMUST00000110824	lower	2	9	1414	0.0296307	Atxn7l1	ataxin 7-like 1 Gene [Source:MGI Symbol;Acc:MGI:3584458]
ENSMUST00000075886	lower	2	9	1414	0.0296307	Gm5900	predicted pseudogene 5900 Pseudogene [Source:MGI Symbol;Acc:MGI:3643907]
ENSMUST00000059068	lower	2	9	1414	0.0296307	NA	NA
ENSMUST00000085537	lower	2	9	1414	0.0296307	Kidins220	kinase D-interacting substrate 220 Gene [Source:MGI Symbol;Acc:MGI:1924730]
ENSMUST00000118483	higher	2	16	1378	0.0310735	Rps6kb2	ribosomal protein S6 kinase, polypeptide 2 Gene [Source:MGI Symbol;Acc:MGI:1927343]
ENSMUST00000082167	higher	2	16	1378	0.0310735	Olfr1283	olfactory receptor 1283 Gene [Source:MGI Symbol;Acc:MGI:3031117]
ENSMUST00000096159	higher	2	16	1378	0.0310735	Gm10341	predicted gene 10341 Gene [Source:MGI Symbol;Acc:MGI:3704418]
ENSMUST00000084968	higher	2	16	1378	0.0310735	Rcor1	REST corepressor 1 Gene [Source:MGI Symbol;Acc:MGI:106340]
ENSMUST00000105230	higher	2	16	1378	0.0310735	Sarnp	SAP domain containing ribonucleoprotein Gene [Source:MGI Symbol;Acc:MGI:1913368]
ENSMUST00000113335	higher	2	16	1378	0.0310735	Ubr2	ubiquitin protein ligase E3 component n-recognin 2 Gene [Source:MGI Symbol;Acc:MGI:1861099]
ENSMUST00000022923	higher	3	57	1378	0.0310735	Csmd3	CUB and Sushi multiple domains 3 Gene [Source:MGI Symbol;Acc:MGI:2386403]
ENSMUST00000112540	higher	2	16	1378	0.0310735	2310001H12Rik	RIKEN cDNA 2310001H12 gene Gene [Source:MGI Symbol;Acc:MGI:1916754]
ENSMUST00000119262	higher	2	16	1378	0.0310735	Gm12944	predicted gene 12944 Pseudogene [Source:MGI Symbol;Acc:MGI:3650498]
ENSMUST00000112584	higher	2	16	1378	0.0310735	Kdm5c	lysine (K)-specific demethylase 5C Gene [Source:MGI Symbol;Acc:MGI:99781]
ENSMUST00000114782	higher	2	16	1378	0.0310735	Stxbp5l	syntaxin binding protein 5-like Gene [Source:MGI Symbol;Acc:MGI:2443815]
ENSMUST00000087958	lower	3	39	1414	0.0311166	NA	NA
ENSMUST00000044990	lower	2	10	1414	0.0320808	Slc24a2	solute carrier family 24 (sodium/potassium/calcium exchanger), member 2 Gene [Source:MGI Symbol;Acc:MGI:1923626]
ENSMUST00000022062	lower	2	10	1414	0.0320808	Sdha	succinate dehydrogenase complex, subunit A, flavoprotein (Fp) Gene [Source:MGI Symbol;Acc:MGI:1914195]
ENSMUST00000094467	lower	2	10	1414	0.0320808	Entpd6	ectonucleoside triphosphate diphosphohydrolase 6 Gene [Source:MGI Symbol;Acc:MGI:1202295]
ENSMUST00000105686	lower	2	10	1414	0.0320808	Slc25a33	solute carrier family 25, member 33 Gene [Source:MGI Symbol;Acc:MGI:1917806]
ENSMUST00000002845	lower	2	10	1414	0.0320808	Mea1	male enhanced antigen 1 Gene [Source:MGI Symbol;Acc:MGI:96957]
ENSMUST00000116547	lower	2	10	1414	0.0320808	Chic1	cysteine-rich hydrophobic domain 1 Gene [Source:MGI Symbol;Acc:MGI:1344694]
ENSMUST00000102478	lower	2	10	1414	0.0320808	Aldoc	aldolase C, fructose-bisphosphate Gene [Source:MGI Symbol;Acc:MGI:101863]
ENSMUST00000067521	higher	2	17	1378	0.0329894	Zcchc7	zinc finger, CCHC domain containing 7 Gene [Source:MGI Symbol;Acc:MGI:2442912]
ENSMUST00000012612	higher	2	17	1378	0.0329894	Zmiz2	zinc finger, MIZ-type containing 2 Gene [Source:MGI Symbol;Acc:MGI:106374]
ENSMUST00000082177	higher	2	17	1378	0.0329894	Kdm5c	lysine (K)-specific demethylase 5C Gene [Source:MGI Symbol;Acc:MGI:99781]
ENSMUST00000065574	higher	2	17	1378	0.0329894	Tm2d3	TM2 domain containing 3 Gene [Source:MGI Symbol;Acc:MGI:1915884]
ENSMUST00000065932	higher	2	17	1378	0.0329894	Gripap1	GRIP1 associated protein 1 Gene [Source:MGI Symbol;Acc:MGI:1859616]
ENSMUST00000053407	higher	2	17	1378	0.0329894	Alkbh8	alkB, alkylation repair homolog 8 (E. coli) Gene [Source:MGI Symbol;Acc:MGI:1914917]
ENSMUST00000113337	higher	2	17	1378	0.0329894	Ubr2	ubiquitin protein ligase E3 component n-recognin 2 Gene [Source:MGI Symbol;Acc:MGI:1861099]
ENSMUST00000068282	higher	2	17	1378	0.0329894	Atl2	atlastin GTPase 2 Gene [Source:MGI Symbol;Acc:MGI:1929492]
ENSMUST00000106121	higher	2	17	1378	0.0329894	Fubp1	far upstream element (FUSE) binding protein 1 Gene [Source:MGI Symbol;Acc:MGI:1196294]
ENSMUST00000095004	higher	2	18	1378	0.0353407	Gm7347	predicted gene 7347 Gene [Source:MGI Symbol;Acc:MGI:3645983]
ENSMUST00000073108	higher	2	18	1378	0.0353407	Gm6851	predicted pseudogene 6851 Pseudogene [Source:MGI Symbol;Acc:MGI:3643618]
ENSMUST00000041772	higher	2	18	1378	0.0353407	Dmxl1	Dmx-like 1 Gene [Source:MGI Symbol;Acc:MGI:2443926]
ENSMUST00000100893	higher	2	18	1378	0.0353407	Gm10411	predicted gene 10411 Gene [Source:MGI Symbol;Acc:MGI:3809931]
ENSMUST00000114787	higher	2	18	1378	0.0353407	Stxbp5l	syntaxin binding protein 5-like Gene [Source:MGI Symbol;Acc:MGI:2443815]
ENSMUST00000009885	higher	2	18	1378	0.0353407	Ubp1	upstream binding protein 1 Gene [Source:MGI Symbol;Acc:MGI:104889]
ENSMUST00000074791	higher	2	18	1378	0.0353407	Gm6919	predicted gene 6919 Gene [Source:MGI Symbol;Acc:MGI:3648520]
ENSMUST00000115903	lower	2	11	1414	0.0361268	AC087559.6	C-C motif chemokine 21a [Source:UniProtKB/Swiss-Prot;Acc:P84443]
ENSMUST00000095114	lower	2	11	1414	0.0361268	Ccl21a	chemokine (C-C motif) ligand 21A (serine) Gene [Source:MGI Symbol;Acc:MGI:1349183]
ENSMUST00000097277	lower	2	11	1414	0.0361268	NA	NA
ENSMUST00000095048	lower	2	11	1414	0.0361268	Rab7	RAB7, member RAS oncogene family Gene [Source:MGI Symbol;Acc:MGI:105068]
ENSMUST00000064090	lower	2	11	1414	0.0361268	NA	NA
ENSMUST00000027149	lower	2	12	1414	0.0365686	Lancl1	LanC (bacterial lantibiotic synthetase component C)-like 1 Gene [Source:MGI Symbol;Acc:MGI:1336997]
ENSMUST00000044355	lower	2	12	1414	0.0365686	Sepw1	selenoprotein W, muscle 1 Gene [Source:MGI Symbol;Acc:MGI:1100878]
ENSMUST00000080666	lower	2	12	1414	0.0365686	Ndrg4	N-myc downstream regulated gene 4 Gene [Source:MGI Symbol;Acc:MGI:2384590]
ENSMUST00000031333	lower	2	12	1414	0.0365686	Gtf2h3	general transcription factor IIH, polypeptide 3 Gene [Source:MGI Symbol;Acc:MGI:1277143]
ENSMUST00000030787	lower	2	12	1414	0.0365686	Rheb	Ras homolog enriched in brain Gene [Source:MGI Symbol;Acc:MGI:97912]
ENSMUST00000064762	lower	2	12	1414	0.0365686	Mtap1b	microtubule-associated protein 1B Gene [Source:MGI Symbol;Acc:MGI:1306778]
ENSMUST00000109014	lower	2	12	1414	0.0365686	NA	NA
ENSMUST00000005751	lower	2	12	1414	0.0365686	Mrvi1	MRV integration site 1 Gene [Source:MGI Symbol;Acc:MGI:1338023]
ENSMUST00000074741	lower	2	12	1414	0.0365686	Rab1	RAB1, member RAS oncogene family Gene [Source:MGI Symbol;Acc:MGI:97842]
ENSMUST00000108622	lower	2	12	1414	0.0365686	Acap1	ArfGAP with coiled-coil, ankyrin repeat and PH domains 1 Gene [Source:MGI Symbol;Acc:MGI:2388270]
ENSMUST00000110847	lower	2	12	1414	0.0365686	NA	NA
ENSMUST00000100024	lower	2	12	1414	0.0365686	Fgf12	fibroblast growth factor 12 Gene [Source:MGI Symbol;Acc:MGI:109183]
ENSMUST00000113228	higher	2	19	1378	0.0386361	Drp2	dystrophin related protein 2 Gene [Source:MGI Symbol;Acc:MGI:107432]
ENSMUST00000000228	higher	2	19	1378	0.0386361	Drp2	dystrophin related protein 2 Gene [Source:MGI Symbol;Acc:MGI:107432]
ENSMUST00000113224	higher	2	19	1378	0.0386361	Drp2	dystrophin related protein 2 Gene [Source:MGI Symbol;Acc:MGI:107432]
ENSMUST00000090935	lower	2	14	1414	0.039084	Acvr1	activin A receptor, type 1 Gene [Source:MGI Symbol;Acc:MGI:87911]
ENSMUST00000101097	lower	2	14	1414	0.039084	Gm5943	predicted pseudogene 5943 Pseudogene [Source:MGI Symbol;Acc:MGI:3646004]
ENSMUST00000109602	lower	2	13	1414	0.039084	Rab1	RAB1, member RAS oncogene family Gene [Source:MGI Symbol;Acc:MGI:97842]
ENSMUST00000098128	lower	2	14	1414	0.039084	Ccl21b	chemokine (C-C motif) ligand 21B (leucine) Gene [Source:MGI Symbol;Acc:MGI:1349182]
ENSMUST00000065911	lower	2	13	1414	0.039084	Akap6	A kinase (PRKA) anchor protein 6 Gene [Source:MGI Symbol;Acc:MGI:3050566]
ENSMUST00000109016	lower	2	14	1414	0.039084	NA	NA
ENSMUST00000108012	lower	2	14	1414	0.039084	Gm1987	predicted gene 1987 Gene [Source:MGI Symbol;Acc:MGI:3780156]
ENSMUST00000095723	lower	2	14	1414	0.039084	Gm9034	predicted pseudogene 9034 Pseudogene [Source:MGI Symbol;Acc:MGI:3643526]
ENSMUST00000098123	lower	2	14	1414	0.039084	Gm13304	predicted gene 13304 Gene [Source:MGI Symbol;Acc:MGI:3710514]
ENSMUST00000026577	lower	2	14	1414	0.039084	Eps8l2	EPS8-like 2 Gene [Source:MGI Symbol;Acc:MGI:2138828]
ENSMUST00000108000	lower	2	14	1414	0.039084	Ccl21c	chemokine (C-C motif) ligand 21C (leucine) Gene [Source:MGI Symbol;Acc:MGI:1891386]
ENSMUST00000089898	lower	2	14	1414	0.039084	Rps15-ps2	ribosomal protein S15, pseudogene 2 Pseudogene [Source:MGI Symbol;Acc:MGI:3647234]
ENSMUST00000115921	lower	2	14	1414	0.039084	AC087559.11	C-C motif chemokine 21a [Source:UniProtKB/Swiss-Prot;Acc:P84443]
ENSMUST00000095737	lower	2	13	1414	0.039084	Akap6	A kinase (PRKA) anchor protein 6 Gene [Source:MGI Symbol;Acc:MGI:3050566]
ENSMUST00000003345	lower	2	14	1414	0.039084	Amph	amphiphysin Gene [Source:MGI Symbol;Acc:MGI:103574]
ENSMUST00000099018	lower	2	14	1414	0.039084	NA	NA
ENSMUST00000073139	lower	2	13	1414	0.039084	Ndrg4	N-myc downstream regulated gene 4 Gene [Source:MGI Symbol;Acc:MGI:2384590]
ENSMUST00000118521	lower	2	13	1414	0.039084	Gm14480	predicted gene 14480 Pseudogene [Source:MGI Symbol;Acc:MGI:3650191]
ENSMUST00000090936	lower	2	13	1414	0.039084	NA	NA
ENSMUST00000098114	lower	2	14	1414	0.039084	Gm10591	predicted gene 10591 Gene [Source:MGI Symbol;Acc:MGI:3711256]
ENSMUST00000097014	lower	2	14	1414	0.039084	Tuba1a	tubulin, alpha 1A Gene [Source:MGI Symbol;Acc:MGI:98869]
ENSMUST00000089805	lower	2	14	1414	0.039084	Dclk1	doublecortin-like kinase 1 Gene [Source:MGI Symbol;Acc:MGI:1330861]
ENSMUST00000100670	higher	3	66	1378	0.0398067	Csmd3	CUB and Sushi multiple domains 3 Gene [Source:MGI Symbol;Acc:MGI:2386403]
ENSMUST00000113627	higher	2	20	1378	0.0417491	Pin4	protein (peptidyl-prolyl cis/trans isomerase) NIMA-interacting, 4 (parvulin) Gene [Source:MGI Symbol;Acc:MGI:1916963]
ENSMUST00000111991	higher	2	20	1378	0.0417491	Dhx30	DEAH (Asp-Glu-Ala-His) box polypeptide 30 Gene [Source:MGI Symbol;Acc:MGI:1920081]
ENSMUST00000031382	higher	2	20	1378	0.0417491	Clip1	CAP-GLY domain containing linker protein 1 Gene [Source:MGI Symbol;Acc:MGI:1928401]
ENSMUST00000099016	lower	2	15	1414	0.0424122	NA	NA
ENSMUST00000006991	lower	2	15	1414	0.0424122	Hcn1	hyperpolarization-activated, cyclic nucleotide-gated K+ 1 Gene [Source:MGI Symbol;Acc:MGI:1096392]
ENSMUST00000076373	lower	2	15	1414	0.0424122	Gm8730	predicted pseudogene 8730 Pseudogene [Source:MGI Symbol;Acc:MGI:3644565]
ENSMUST00000032825	lower	2	15	1414	0.0424122	Mfge8	milk fat globule-EGF factor 8 protein Gene [Source:MGI Symbol;Acc:MGI:102768]
ENSMUST00000081864	lower	2	15	1414	0.0424122	Gm5239	predicted pseudogene 5239 Pseudogene [Source:MGI Symbol;Acc:MGI:3648788]
ENSMUST00000077182	lower	2	15	1414	0.0424122	Nrxn2	neurexin II Gene [Source:MGI Symbol;Acc:MGI:1096362]
ENSMUST00000121563	higher	2	21	1378	0.0438522	Gm15682	predicted gene 15682 Pseudogene [Source:MGI Symbol;Acc:MGI:3783124]
ENSMUST00000112271	higher	2	21	1378	0.0438522	Ace2	angiotensin I converting enzyme (peptidyl-dipeptidase A) 2 Gene [Source:MGI Symbol;Acc:MGI:1917258]
ENSMUST00000119140	higher	2	21	1378	0.0438522	Gm12411	predicted gene 12411 Pseudogene [Source:MGI Symbol;Acc:MGI:3649918]
ENSMUST00000079481	higher	2	21	1378	0.0438522	Rpl21-ps10	ribosomal protein L21, pseudogene 10 Pseudogene [Source:MGI Symbol;Acc:MGI:3643358]
ENSMUST00000122260	higher	2	21	1378	0.0438522	Gm13653	predicted gene 13653 Pseudogene [Source:MGI Symbol;Acc:MGI:3649358]
ENSMUST00000081668	higher	2	21	1378	0.0438522	Rpl21-ps12	ribosomal protein L21, pseudogene 12 Pseudogene [Source:MGI Symbol;Acc:MGI:3648214]
ENSMUST00000110459	higher	2	21	1378	0.0438522	NA	NA
ENSMUST00000035056	higher	2	21	1378	0.0438522	Dhx30	DEAH (Asp-Glu-Ala-His) box polypeptide 30 Gene [Source:MGI Symbol;Acc:MGI:1920081]
ENSMUST00000005470	lower	2	16	1414	0.0449298	Cadm3	cell adhesion molecule 3 Gene [Source:MGI Symbol;Acc:MGI:2137858]
ENSMUST00000096495	lower	2	16	1414	0.0449298	Med14	mediator complex subunit 14 Gene [Source:MGI Symbol;Acc:MGI:1349442]
ENSMUST00000108999	lower	2	16	1414	0.0449298	NA	NA
ENSMUST00000109000	lower	2	16	1414	0.0449298	Gm14403	predicted gene 14403 Gene [Source:MGI Symbol;Acc:MGI:3649813]
ENSMUST00000109015	lower	2	16	1414	0.0449298	NA	NA
ENSMUST00000112599	lower	2	16	1414	0.0449298	Acvr1	activin A receptor, type 1 Gene [Source:MGI Symbol;Acc:MGI:87911]
ENSMUST00000029641	lower	2	16	1414	0.0449298	Accn5	amiloride-sensitive cation channel 5, intestinal Gene [Source:MGI Symbol;Acc:MGI:1929259]
ENSMUST00000034699	lower	2	16	1414	0.0449298	Scg3	secretogranin III Gene [Source:MGI Symbol;Acc:MGI:103032]
ENSMUST00000120316	higher	1	1	1378	0.0468552	4930402H24Rik	RIKEN cDNA 4930402H24 gene Gene [Source:MGI Symbol;Acc:MGI:1923029]
ENSMUST00000063812	higher	1	1	1378	0.0468552	Nln	neurolysin (metallopeptidase M3 family) Gene [Source:MGI Symbol;Acc:MGI:1923055]
ENSMUST00000053257	higher	2	22	1378	0.0468552	Speer4b	spermatogenesis associated glutamate (E)-rich protein 4b Gene [Source:MGI Symbol;Acc:MGI:1920776]
ENSMUST00000020316	higher	2	22	1378	0.0468552	Tbk1	TANK-binding kinase 1 Gene [Source:MGI Symbol;Acc:MGI:1929658]
ENSMUST00000073376	higher	2	22	1378	0.0468552	Gm16416	predicted gene 16416 Pseudogene [Source:MGI Symbol;Acc:MGI:3646635]
ENSMUST00000081249	higher	1	1	1378	0.0468552	NA	NA
ENSMUST00000107409	lower	2	17	1414	0.0482244	Mfge8	milk fat globule-EGF factor 8 protein Gene [Source:MGI Symbol;Acc:MGI:102768]
ENSMUST00000121393	lower	2	17	1414	0.0482244	Gm4631	predicted gene 4631 Gene [Source:MGI Symbol;Acc:MGI:3782813]
ENSMUST00000109049	lower	2	17	1414	0.0482244	Gm14420	predicted gene 14420 Gene [Source:MGI Symbol;Acc:MGI:3652255]
ENSMUST00000108980	lower	2	17	1414	0.0482244	Gm14305	predicted gene 14305 Gene [Source:MGI Symbol;Acc:MGI:3709632]
ENSMUST00000058914	lower	2	17	1414	0.0482244	Tuba1c	tubulin, alpha 1C Gene [Source:MGI Symbol;Acc:MGI:1095409]
ENSMUST00000109050	lower	2	17	1414	0.0482244	Gm4631	predicted gene 4631 Gene [Source:MGI Symbol;Acc:MGI:3782813]
ENSMUST00000081612	higher	2	23	1378	0.049612	NA	NA
ENSMUST00000121754	higher	2	23	1378	0.049612	Gm11703	predicted gene 11703 Pseudogene [Source:MGI Symbol;Acc:MGI:3649808]
ENSMUST00000060955	higher	2	23	1378	0.049612	Gpcpd1	glycerophosphocholine phosphodiesterase GDE1 homolog (S. cerevisiae) Gene [Source:MGI Symbol;Acc:MGI:104898]
ENSMUST00000079447	higher	2	23	1378	0.049612	Speer4a	spermatogenesis associated glutamate (E)-rich protein 4a Gene [Source:MGI Symbol;Acc:MGI:1922907]
