# Supplementary material for: Neuroglobin-Deficiency Exacerbates Hif1A and c-FOS Response, but Does Not Affect Neuronal Survival during Severe Hypoxia In Vivo
Source: PLoS One. 2011 Dec 2;6(12):e28160. doi: 10.1371/journal.pone.0028160 (PMC3229544; doi:10.1371/journal.pone.0028160)
Supplement: Table S13 — Transcripts differentially expressed between wt and Ngb-deficient mice only after 24 hours of hypoxia. Where appropriate, description of the column has been provided as a comment in the column heading. (XLS) [file pone.0028160.s014.xls]

## Sheet: Diff_expression_24h (genotype)
Transcript ID (Ensembl)	Differential expression in KO	Q&T	T	Q	p-value	Gene Symbol	Gene Description
ENSMUST00000071087	higher	29	122	10440	1.86786e-12	Cspp1	centrosome and spindle pole associated protein 1 Gene [Source:MGI Symbol;Acc:MGI:2681832]
ENSMUST00000067925	lower	12	22	9738	6.72777e-09	Hmgb2	high mobility group box 2 Gene [Source:MGI Symbol;Acc:MGI:96157]
ENSMUST00000036070	lower	9	13	9738	1.33623e-07	Fam107a	family with sequence similarity 107, member A Gene [Source:MGI Symbol;Acc:MGI:3041256]
ENSMUST00000096172	higher	11	24	10440	5.1e-07	Gm5796	predicted gene 5796 Gene [Source:MGI Symbol;Acc:MGI:3779522]
ENSMUST00000096184	higher	11	24	10440	5.1e-07	Gm5796	predicted gene 5796 Gene [Source:MGI Symbol;Acc:MGI:3779522]
ENSMUST00000021506	higher	8	11	10440	8.47695e-07	Serpina3n	serine (or cysteine) peptidase inhibitor, clade A, member 3N Gene [Source:MGI Symbol;Acc:MGI:105045]
ENSMUST00000100904	higher	9	18	10440	5.70801e-06	Gm5796	predicted gene 5796 Gene [Source:MGI Symbol;Acc:MGI:3779522]
ENSMUST00000112776	higher	9	19	10440	8.75747e-06	Gm11104	predicted gene 11104 Gene [Source:MGI Symbol;Acc:MGI:3779350]
ENSMUST00000121887	lower	7	10	9738	1.48583e-05	Fam107a	family with sequence similarity 107, member A Gene [Source:MGI Symbol;Acc:MGI:3041256]
ENSMUST00000090652	higher	9	22	10440	3.21801e-05	Gm10128	predicted gene 10128 Pseudogene [Source:MGI Symbol;Acc:MGI:3704427]
ENSMUST00000096177	higher	9	22	10440	3.21801e-05	Gm10340	predicted gene 10340 Gene [Source:MGI Symbol;Acc:MGI:3641969]
ENSMUST00000100885	higher	8	17	10440	4.60519e-05	Gm10407	predicted gene 10407 Gene [Source:MGI Symbol;Acc:MGI:3779113]
ENSMUST00000112735	higher	9	24	10440	5.77685e-05	Gm3358	predicted gene 3358 Pseudogene [Source:MGI Symbol;Acc:MGI:3781536]
ENSMUST00000112758	higher	9	24	10440	5.77685e-05	Gm3383	predicted gene 3383 Pseudogene [Source:MGI Symbol;Acc:MGI:3781561]
ENSMUST00000100893	higher	8	18	10440	6.02674e-05	Gm10411	predicted gene 10411 Gene [Source:MGI Symbol;Acc:MGI:3809931]
ENSMUST00000073782	higher	7	13	10440	6.87267e-05	Gm4979	predicted gene 4979 Gene [Source:MGI Symbol;Acc:MGI:3644476]
ENSMUST00000090662	higher	9	25	10440	6.87267e-05	Gm3558	predicted gene 3558 Pseudogene [Source:MGI Symbol;Acc:MGI:3781735]
ENSMUST00000049093	lower	7	12	9738	6.94652e-05	Txnip	thioredoxin interacting protein Gene [Source:MGI Symbol;Acc:MGI:1889549]
ENSMUST00000100914	higher	8	19	10440	7.12332e-05	Gm3298	predicted gene 3298 Pseudogene [Source:MGI Symbol;Acc:MGI:3781476]
ENSMUST00000112778	higher	8	19	10440	7.12332e-05	2610042L04Rik	RIKEN cDNA 2610042L04 gene Gene [Source:MGI Symbol;Acc:MGI:1914305]
ENSMUST00000096171	higher	8	19	10440	7.12332e-05	Gm3298	predicted gene 3298 Pseudogene [Source:MGI Symbol;Acc:MGI:3781476]
ENSMUST00000113729	higher	7	14	10440	0.000100455	B230307C23Rik	RIKEN cDNA B230307C23 gene Gene [Source:MGI Symbol;Acc:MGI:3643396]
ENSMUST00000112801	higher	8	20	10440	0.000102977	Gm3020	predicted gene 3020 Pseudogene [Source:MGI Symbol;Acc:MGI:3781198]
ENSMUST00000112809	higher	6	10	10440	0.000140735	Gm8348	predicted pseudogene 8348 Pseudogene [Source:MGI Symbol;Acc:MGI:3646129]
ENSMUST00000096178	higher	8	21	10440	0.000140735	Gm10406	predicted gene 10406 Gene [Source:MGI Symbol;Acc:MGI:3711272]
ENSMUST00000027195	higher	6	10	10440	0.000140735	NA	NA
ENSMUST00000044819	higher	6	10	10440	0.000140735	E130120F12Rik	RIKEN cDNA E130120F12 gene Gene [Source:MGI Symbol;Acc:MGI:3612873]
ENSMUST00000100895	higher	8	21	10440	0.000140735	Gm10406	predicted gene 10406 Gene [Source:MGI Symbol;Acc:MGI:3711272]
ENSMUST00000035199	higher	6	10	10440	0.000140735	Rbm5	RNA binding motif protein 5 Gene [Source:MGI Symbol;Acc:MGI:1933204]
ENSMUST00000105729	higher	8	22	10440	0.000179528	NA	NA
ENSMUST00000116476	higher	7	16	10440	0.000195504	Pabpn1	poly(A) binding protein, nuclear 1 Gene [Source:MGI Symbol;Acc:MGI:1859158]
ENSMUST00000037633	higher	7	16	10440	0.000195504	Zc3h7a	zinc finger CCCH type containing 7 A Gene [Source:MGI Symbol;Acc:MGI:2445044]
ENSMUST00000012314	higher	7	16	10440	0.000195504	A530054K11Rik	RIKEN cDNA A530054K11 gene Gene [Source:MGI Symbol;Acc:MGI:3036250]
ENSMUST00000084149	higher	8	23	10440	0.000231286	Gm13139	predicted gene 13139 Gene [Source:MGI Symbol;Acc:MGI:3701604]
ENSMUST00000054308	higher	6	11	10440	0.000242314	G2e3	G2/M-phase specific E3 ubiquitin ligase Gene [Source:MGI Symbol;Acc:MGI:2444298]
ENSMUST00000112798	higher	8	24	10440	0.00028829	Gm3002	predicted gene 3002 Pseudogene [Source:MGI Symbol;Acc:MGI:3781180]
ENSMUST00000112797	higher	8	24	10440	0.00028829	Gm3002	predicted gene 3002 Pseudogene [Source:MGI Symbol;Acc:MGI:3781180]
ENSMUST00000087956	higher	7	17	10440	0.00028829	Med12	mediator of RNA polymerase II transcription, subunit 12 homolog (yeast) Gene [Source:MGI Symbol;Acc:MGI:1926212]
ENSMUST00000112820	higher	8	24	10440	0.00028829	Gm2897	predicted gene 2897 Pseudogene [Source:MGI Symbol;Acc:MGI:3781075]
ENSMUST00000090663	higher	7	18	10440	0.000370922	Gm3194	predicted gene 3194 Pseudogene [Source:MGI Symbol;Acc:MGI:3781373]
ENSMUST00000037023	higher	8	25	10440	0.000370922	Rps29	ribosomal protein S29 Gene [Source:MGI Symbol;Acc:MGI:107681]
ENSMUST00000112737	higher	7	18	10440	0.000370922	Gm3358	predicted gene 3358 Pseudogene [Source:MGI Symbol;Acc:MGI:3781536]
ENSMUST00000112738	higher	7	18	10440	0.000370922	Gm3358	predicted gene 3358 Pseudogene [Source:MGI Symbol;Acc:MGI:3781536]
ENSMUST00000090661	higher	7	18	10440	0.000370922	Gm3194	predicted gene 3194 Pseudogene [Source:MGI Symbol;Acc:MGI:3781373]
ENSMUST00000090462	higher	6	13	10440	0.000625662	Sec24c	Sec24 related gene family, member C (S. cerevisiae) Gene [Source:MGI Symbol;Acc:MGI:1919746]
ENSMUST00000107234	higher	6	13	10440	0.000625662	Eed	embryonic ectoderm development Gene [Source:MGI Symbol;Acc:MGI:95286]
ENSMUST00000112728	higher	8	27	10440	0.000637347	Gm10413	predicted gene 10413 Gene [Source:MGI Symbol;Acc:MGI:3704417]
ENSMUST00000120122	higher	5	8	10440	0.000637347	Cul5	cullin 5 Gene [Source:MGI Symbol;Acc:MGI:1922967]
ENSMUST00000112759	higher	7	20	10440	0.000693894	Gm3383	predicted gene 3383 Pseudogene [Source:MGI Symbol;Acc:MGI:3781561]
ENSMUST00000119876	higher	7	20	10440	0.000693894	Rps25-ps1	ribosomal protein S25, pseudogene 1 Pseudogene [Source:MGI Symbol;Acc:MGI:3642902]
ENSMUST00000090650	higher	7	20	10440	0.000693894	Gm3629	predicted gene 3629 Pseudogene [Source:MGI Symbol;Acc:MGI:3781805]
ENSMUST00000096169	higher	7	20	10440	0.000693894	Gm3629	predicted gene 3629 Pseudogene [Source:MGI Symbol;Acc:MGI:3781805]
ENSMUST00000112760	higher	7	20	10440	0.000693894	Gm3383	predicted gene 3383 Pseudogene [Source:MGI Symbol;Acc:MGI:3781561]
ENSMUST00000121816	lower	7	17	9738	0.000845202	Gm13232	predicted gene 13232 Pseudogene [Source:MGI Symbol;Acc:MGI:3649252]
ENSMUST00000099241	lower	6	11	9738	0.000845202	Ccl28	chemokine (C-C motif) ligand 28 Gene [Source:MGI Symbol;Acc:MGI:1861731]
ENSMUST00000122151	lower	7	17	9738	0.000845202	Gm13237	predicted gene 13237 Pseudogene [Source:MGI Symbol;Acc:MGI:3649924]
ENSMUST00000089441	higher	6	14	10440	0.000892601	Gm7079	predicted pseudogene 7079 Pseudogene [Source:MGI Symbol;Acc:MGI:3643105]
ENSMUST00000025747	higher	7	21	10440	0.000969985	NA	NA
ENSMUST00000004225	higher	6	15	10440	0.00131257	Zfp87	zinc finger protein 87 Gene [Source:MGI Symbol;Acc:MGI:107768]
ENSMUST00000087948	higher	6	15	10440	0.00131257	Med12	mediator of RNA polymerase II transcription, subunit 12 homolog (yeast) Gene [Source:MGI Symbol;Acc:MGI:1926212]
ENSMUST00000076916	higher	6	15	10440	0.00131257	Ttc14	tetratricopeptide repeat domain 14 Gene [Source:MGI Symbol;Acc:MGI:1914370]
ENSMUST00000099494	higher	6	15	10440	0.00131257	Btaf1	BTAF1 RNA polymerase II, B-TFIID transcription factor-associated, (Mot1 homolog, S. cerevisiae) Gene [Source:MGI Symbol;Acc:MGI:2147538]
ENSMUST00000034868	higher	4	5	10440	0.00134876	Clk1	CDC-like kinase 1 Gene [Source:MGI Symbol;Acc:MGI:107403]
ENSMUST00000023385	higher	4	5	10440	0.00134876	NA	NA
ENSMUST00000092720	higher	7	23	10440	0.00169191	5430403G16Rik	RIKEN cDNA 5430403G16 gene Gene [Source:MGI Symbol;Acc:MGI:1924450]
ENSMUST00000117706	higher	6	16	10440	0.0018684	Med12	mediator of RNA polymerase II transcription, subunit 12 homolog (yeast) Gene [Source:MGI Symbol;Acc:MGI:1926212]
ENSMUST00000014499	higher	12	75	10440	0.0018684	Anapc1	anaphase promoting complex subunit 1 Gene [Source:MGI Symbol;Acc:MGI:103097]
ENSMUST00000058187	higher	5	10	10440	0.00195165	NA	NA
ENSMUST00000078693	higher	6	17	10440	0.00266909	NA	NA
ENSMUST00000112784	higher	6	17	10440	0.00266909	Gm11106	predicted gene 11106 Gene [Source:MGI Symbol;Acc:MGI:3779353]
ENSMUST00000100670	higher	11	66	10440	0.00269293	Csmd3	CUB and Sushi multiple domains 3 Gene [Source:MGI Symbol;Acc:MGI:2386403]
ENSMUST00000085572	higher	12	79	10440	0.00293406	NA	NA
ENSMUST00000121643	higher	5	11	10440	0.00302857	Gm7618	predicted pseudogene 7618 Pseudogene [Source:MGI Symbol;Acc:MGI:3644742]
ENSMUST00000095588	higher	5	11	10440	0.00302857	2210408I21Rik	RIKEN cDNA 2210408I21 gene Gene [Source:MGI Symbol;Acc:MGI:1919621]
ENSMUST00000073474	higher	5	11	10440	0.00302857	NA	NA
ENSMUST00000053498	higher	5	11	10440	0.00302857	Rnf216	ring finger protein 216 Gene [Source:MGI Symbol;Acc:MGI:1344349]
ENSMUST00000043618	higher	5	11	10440	0.00302857	NA	NA
ENSMUST00000072222	higher	4	6	10440	0.00311483	Zfp329	zinc finger protein 329 Gene [Source:MGI Symbol;Acc:MGI:1921283]
ENSMUST00000115008	higher	4	6	10440	0.00311483	NA	NA
ENSMUST00000112744	higher	6	18	10440	0.00335358	Gm3468	predicted gene 3468 Pseudogene [Source:MGI Symbol;Acc:MGI:3781644]
ENSMUST00000109924	higher	5	12	10440	0.0043582	Gm4979	predicted gene 4979 Gene [Source:MGI Symbol;Acc:MGI:3644476]
ENSMUST00000094291	higher	5	12	10440	0.0043582	Rps29	ribosomal protein S29 Gene [Source:MGI Symbol;Acc:MGI:107681]
ENSMUST00000121320	higher	5	12	10440	0.0043582	Gm14303	predicted gene 14303 Pseudogene [Source:MGI Symbol;Acc:MGI:3651379]
ENSMUST00000087330	higher	6	19	10440	0.0043582	Fam178a	family with sequence similarity 178, member A Gene [Source:MGI Symbol;Acc:MGI:1924968]
ENSMUST00000073157	higher	5	12	10440	0.0043582	Zfp71-rs1	zinc finger protein 71, related sequence Gene [Source:MGI Symbol;Acc:MGI:107769]
ENSMUST00000095724	higher	6	19	10440	0.0043582	0610007P08Rik	RIKEN cDNA 0610007P08 gene Gene [Source:MGI Symbol;Acc:MGI:1923501]
ENSMUST00000112795	higher	6	19	10440	0.0043582	Gm3033	predicted gene 3033 Pseudogene [Source:MGI Symbol;Acc:MGI:3781211]
ENSMUST00000112794	higher	6	19	10440	0.0043582	Gm3033	predicted gene 3033 Pseudogene [Source:MGI Symbol;Acc:MGI:3781211]
ENSMUST00000118637	higher	3	3	10440	0.00557826	Gm11694	predicted gene 11694 Pseudogene [Source:MGI Symbol;Acc:MGI:3650243]
ENSMUST00000023524	higher	5	13	10440	0.00640488	Rabl3	RAB, member of RAS oncogene family-like 3 Gene [Source:MGI Symbol;Acc:MGI:1914907]
ENSMUST00000074148	higher	5	13	10440	0.00640488	Gm7361	predicted gene 7361 Gene [Source:MGI Symbol;Acc:MGI:3805965]
ENSMUST00000064165	higher	5	13	10440	0.00640488	Cx3cr1	chemokine (C-X3-C) receptor 1 Gene [Source:MGI Symbol;Acc:MGI:1333815]
ENSMUST00000108191	higher	5	13	10440	0.00640488	Epha7	Eph receptor A7 Gene [Source:MGI Symbol;Acc:MGI:95276]
ENSMUST00000109778	higher	5	13	10440	0.00640488	NA	NA
ENSMUST00000002825	higher	5	14	10440	0.00886314	Baz1b	bromodomain adjacent to zinc finger domain, 1B Gene [Source:MGI Symbol;Acc:MGI:1353499]
ENSMUST00000029964	higher	5	14	10440	0.00886314	Epha7	Eph receptor A7 Gene [Source:MGI Symbol;Acc:MGI:95276]
ENSMUST00000095970	higher	5	14	10440	0.00886314	RP23-89F1.2	Alpha21-takusan [Source:UniProtKB/TrEMBL;Acc:A6NAT8]
ENSMUST00000090673	higher	5	14	10440	0.00886314	Gm10341	predicted gene 10341 Gene [Source:MGI Symbol;Acc:MGI:3704418]
ENSMUST00000097590	higher	5	14	10440	0.00886314	Lars	leucyl-tRNA synthetase Gene [Source:MGI Symbol;Acc:MGI:1913808]
ENSMUST00000100901	higher	5	14	10440	0.00886314	Gm10409	predicted gene 10409 Gene [Source:MGI Symbol;Acc:MGI:3710610]
ENSMUST00000107554	higher	5	14	10440	0.00886314	Zkscan16	zinc finger with KRAB and SCAN domains 16 Gene [Source:MGI Symbol;Acc:MGI:3510405]
ENSMUST00000098331	higher	5	14	10440	0.00886314	Cpeb1	cytoplasmic polyadenylation element binding protein 1 Gene [Source:MGI Symbol;Acc:MGI:108442]
ENSMUST00000055935	lower	5	10	9738	0.00951843	Pcdhga11	protocadherin gamma subfamily A, 11 Gene [Source:MGI Symbol;Acc:MGI:1935228]
ENSMUST00000062167	lower	5	10	9738	0.00951843	NA	NA
ENSMUST00000001171	higher	4	8	10440	0.00960842	Lman2l	lectin, mannose-binding 2-like Gene [Source:MGI Symbol;Acc:MGI:2443010]
ENSMUST00000029602	higher	4	8	10440	0.00960842	Ndst3	N-deacetylase/N-sulfotransferase (heparan glucosaminyl) 3 Gene [Source:MGI Symbol;Acc:MGI:1932544]
ENSMUST00000003759	higher	4	8	10440	0.00960842	Ciao1	cytosolic iron-sulfur protein assembly 1 homolog (S. cerevisiae) Gene [Source:MGI Symbol;Acc:MGI:1346998]
ENSMUST00000031499	higher	4	8	10440	0.00960842	Sirt4	sirtuin 4 (silent mating type information regulation 2 homolog) 4 (S. cerevisiae) Gene [Source:MGI Symbol;Acc:MGI:1922637]
ENSMUST00000112067	higher	4	8	10440	0.00960842	Sirt4	sirtuin 4 (silent mating type information regulation 2 homolog) 4 (S. cerevisiae) Gene [Source:MGI Symbol;Acc:MGI:1922637]
ENSMUST00000114018	higher	4	8	10440	0.00960842	Mtap2	microtubule-associated protein 2 Gene [Source:MGI Symbol;Acc:MGI:97175]
ENSMUST00000091429	higher	4	8	10440	0.00960842	Ptpla	protein tyrosine phosphatase-like (proline instead of catalytic arginine), member a Gene [Source:MGI Symbol;Acc:MGI:1353592]
ENSMUST00000105439	higher	4	8	10440	0.00960842	Lrrtm3	leucine rich repeat transmembrane neuronal 3 Gene [Source:MGI Symbol;Acc:MGI:2389177]
ENSMUST00000099316	higher	6	23	10440	0.0110288	Cep290	centrosomal protein 290 Gene [Source:MGI Symbol;Acc:MGI:2384917]
ENSMUST00000040442	higher	5	15	10440	0.0114664	Aox4	aldehyde oxidase 4 Gene [Source:MGI Symbol;Acc:MGI:1919122]
ENSMUST00000022808	higher	5	15	10440	0.0114664	Pabpn1	poly(A) binding protein, nuclear 1 Gene [Source:MGI Symbol;Acc:MGI:1859158]
ENSMUST00000079948	higher	5	15	10440	0.0114664	NA	NA
ENSMUST00000061427	higher	14	127	10440	0.0140599	Adamts3	a disintegrin-like and metallopeptidase (reprolysin type) with thrombospondin type 1 motif, 3 Gene [Source:MGI Symbol;Acc:MGI:3045353]
ENSMUST00000080166	higher	5	16	10440	0.0147292	Gm10059	predicted pseudogene 10059 Pseudogene [Source:MGI Symbol;Acc:MGI:3642158]
ENSMUST00000080461	higher	5	16	10440	0.0147292	Lig3	ligase III, DNA, ATP-dependent Gene [Source:MGI Symbol;Acc:MGI:109152]
ENSMUST00000099269	higher	4	9	10440	0.0147292	Cd93	CD93 antigen Gene [Source:MGI Symbol;Acc:MGI:106664]
ENSMUST00000072947	higher	3	4	10440	0.0147292	Gm6792	predicted gene 6792 Gene [Source:MGI Symbol;Acc:MGI:3643580]
ENSMUST00000121971	higher	3	4	10440	0.0147292	Gm12013	predicted gene 12013 Pseudogene [Source:MGI Symbol;Acc:MGI:3651371]
ENSMUST00000122051	higher	4	9	10440	0.0147292	1700029I01Rik	RIKEN cDNA 1700029I01 gene Pseudogene [Source:MGI Symbol;Acc:MGI:1917255]
ENSMUST00000096159	higher	5	16	10440	0.0147292	Gm10341	predicted gene 10341 Gene [Source:MGI Symbol;Acc:MGI:3704418]
ENSMUST00000076421	higher	4	9	10440	0.0147292	C030039L03Rik	RIKEN cDNA C030039L03 gene Gene [Source:MGI Symbol;Acc:MGI:2148237]
ENSMUST00000107485	higher	3	4	10440	0.0147292	Msl1	male-specific lethal 1 homolog (Drosophila) Gene [Source:MGI Symbol;Acc:MGI:1921276]
ENSMUST00000097662	higher	4	9	10440	0.0147292	Gigyf2	GRB10 interacting GYF protein 2 Gene [Source:MGI Symbol;Acc:MGI:2138584]
ENSMUST00000100886	higher	5	16	10440	0.0147292	Gm5797	predicted gene 5797 Gene [Source:MGI Symbol;Acc:MGI:3646487]
ENSMUST00000118062	higher	3	4	10440	0.0147292	Gm15531	predicted gene 15531 Pseudogene [Source:MGI Symbol;Acc:MGI:3782979]
ENSMUST00000031023	higher	4	9	10440	0.0147292	Slc4a1ap	solute carrier family 4 (anion exchanger), member 1, adaptor protein Gene [Source:MGI Symbol;Acc:MGI:1196608]
ENSMUST00000062442	lower	4	6	9738	0.0171961	NA	NA
ENSMUST00000091403	lower	7	27	9738	0.0184858	Arsb	arylsulfatase B Gene [Source:MGI Symbol;Acc:MGI:88075]
ENSMUST00000067521	higher	5	17	10440	0.0187867	Zcchc7	zinc finger, CCHC domain containing 7 Gene [Source:MGI Symbol;Acc:MGI:2442912]
ENSMUST00000117203	higher	5	17	10440	0.0187867	Med12	mediator of RNA polymerase II transcription, subunit 12 homolog (yeast) Gene [Source:MGI Symbol;Acc:MGI:1926212]
ENSMUST00000021119	higher	5	17	10440	0.0187867	Aspa	aspartoacylase Gene [Source:MGI Symbol;Acc:MGI:87914]
ENSMUST00000032850	higher	5	17	10440	0.0187867	NA	NA
ENSMUST00000112779	higher	5	17	10440	0.0187867	Gm3149	predicted gene 3149 Gene [Source:MGI Symbol;Acc:MGI:3781328]
ENSMUST00000043710	higher	5	17	10440	0.0187867	NA	NA
ENSMUST00000111510	lower	5	12	9738	0.0196173	Fmo2	flavin containing monooxygenase 2 Gene [Source:MGI Symbol;Acc:MGI:1916776]
ENSMUST00000076922	lower	5	12	9738	0.0196173	Trim30a	tripartite motif-containing 30A Gene [Source:MGI Symbol;Acc:MGI:98178]
ENSMUST00000033135	higher	4	10	10440	0.0207994	Tial1	Tia1 cytotoxic granule-associated RNA binding protein-like 1 Gene [Source:MGI Symbol;Acc:MGI:107913]
ENSMUST00000107180	higher	4	10	10440	0.0207994	Rab30	RAB30, member RAS oncogene family Gene [Source:MGI Symbol;Acc:MGI:1923235]
ENSMUST00000029404	higher	4	10	10440	0.0207994	Ppfia2	protein tyrosine phosphatase, receptor type, f polypeptide (PTPRF), interacting protein (liprin), alpha 2 Gene [Source:MGI Symbol;Acc:MGI:2443834]
ENSMUST00000020649	higher	4	10	10440	0.0207994	Rad50	RAD50 homolog (S. cerevisiae) Gene [Source:MGI Symbol;Acc:MGI:109292]
ENSMUST00000085109	higher	4	10	10440	0.0207994	Ttc8	tetratricopeptide repeat domain 8 Gene [Source:MGI Symbol;Acc:MGI:1923510]
ENSMUST00000037499	higher	4	10	10440	0.0207994	Immp1l	IMP1 inner mitochondrial membrane peptidase-like (S. cerevisiae) Gene [Source:MGI Symbol;Acc:MGI:1913791]
ENSMUST00000117411	higher	4	10	10440	0.0207994	Ssbp1	single-stranded DNA binding protein 1 Gene [Source:MGI Symbol;Acc:MGI:1920040]
ENSMUST00000019050	higher	4	10	10440	0.0207994	P4ha2	procollagen-proline, 2-oxoglutarate 4-dioxygenase (proline 4-hydroxylase), alpha II polypeptide Gene [Source:MGI Symbol;Acc:MGI:894286]
ENSMUST00000023352	higher	6	27	10440	0.0218007	Prkdc	protein kinase, DNA activated, catalytic polypeptide Gene [Source:MGI Symbol;Acc:MGI:104779]
ENSMUST00000037440	higher	6	27	10440	0.0218007	Atm	ataxia telangiectasia mutated homolog (human) Gene [Source:MGI Symbol;Acc:MGI:107202]
ENSMUST00000086778	higher	5	18	10440	0.0226015	Evi5l	ecotropic viral integration site 5 like Gene [Source:MGI Symbol;Acc:MGI:2442167]
ENSMUST00000102966	higher	5	18	10440	0.0226015	NA	NA
ENSMUST00000009885	higher	5	18	10440	0.0226015	Ubp1	upstream binding protein 1 Gene [Source:MGI Symbol;Acc:MGI:104889]
ENSMUST00000112742	higher	5	18	10440	0.0226015	Gm3476	predicted gene 3476 Gene [Source:MGI Symbol;Acc:MGI:3781652]
ENSMUST00000071781	higher	5	18	10440	0.0226015	Gm10123	predicted pseudogene 10123 Pseudogene [Source:MGI Symbol;Acc:MGI:3704342]
ENSMUST00000109377	higher	3	5	10440	0.0267917	Efcab9	EF-hand calcium binding domain 9 Gene [Source:MGI Symbol;Acc:MGI:1916556]
ENSMUST00000105734	higher	5	19	10440	0.0267917	Gm13157	predicted gene 13157 Gene [Source:MGI Symbol;Acc:MGI:3651978]
ENSMUST00000009321	higher	4	11	10440	0.0267917	Dgcr8	DiGeorge syndrome critical region gene 8 Gene [Source:MGI Symbol;Acc:MGI:2151114]
ENSMUST00000118286	higher	5	19	10440	0.0267917	Mfn1	mitofusin 1 Gene [Source:MGI Symbol;Acc:MGI:1914664]
ENSMUST00000034524	higher	4	11	10440	0.0267917	Rexo2	REX2, RNA exonuclease 2 homolog (S. cerevisiae) Gene [Source:MGI Symbol;Acc:MGI:1888981]
ENSMUST00000113817	higher	4	11	10440	0.0267917	NA	NA
ENSMUST00000110142	higher	4	11	10440	0.0267917	Gpcpd1	glycerophosphocholine phosphodiesterase GDE1 homolog (S. cerevisiae) Gene [Source:MGI Symbol;Acc:MGI:104898]
ENSMUST00000077972	higher	4	11	10440	0.0267917	Osbpl6	oxysterol binding protein-like 6 Gene [Source:MGI Symbol;Acc:MGI:2139014]
ENSMUST00000016274	higher	4	11	10440	0.0267917	N4bp2l2	NEDD4 binding protein 2-like 2 Gene [Source:MGI Symbol;Acc:MGI:2687207]
ENSMUST00000090784	higher	4	11	10440	0.0267917	Osbpl6	oxysterol binding protein-like 6 Gene [Source:MGI Symbol;Acc:MGI:2139014]
ENSMUST00000037403	higher	3	5	10440	0.0267917	NA	NA
ENSMUST00000064795	higher	4	11	10440	0.0267917	Egr1	early growth response 1 Gene [Source:MGI Symbol;Acc:MGI:95295]
ENSMUST00000100748	higher	4	11	10440	0.0267917	1810012P15Rik	RIKEN cDNA 1810012P15 gene Gene [Source:MGI Symbol;Acc:MGI:1913524]
ENSMUST00000096441	higher	4	11	10440	0.0267917	Morc2a	microrchidia 2A Gene [Source:MGI Symbol;Acc:MGI:1921772]
ENSMUST00000050069	higher	4	11	10440	0.0267917	Rbm12b	RNA binding motif protein 12B Gene [Source:MGI Symbol;Acc:MGI:1919647]
ENSMUST00000063499	higher	4	11	10440	0.0267917	NA	NA
ENSMUST00000122231	higher	4	11	10440	0.0267917	Rufy2	RUN and FYVE domain-containing 2 Gene [Source:MGI Symbol;Acc:MGI:1917682]
ENSMUST00000015796	higher	4	11	10440	0.0267917	Steap1	six transmembrane epithelial antigen of the prostate 1 Gene [Source:MGI Symbol;Acc:MGI:1917608]
ENSMUST00000009789	higher	4	11	10440	0.0267917	P4ha1	procollagen-proline, 2-oxoglutarate 4-dioxygenase (proline 4-hydroxylase), alpha 1 polypeptide Gene [Source:MGI Symbol;Acc:MGI:97463]
ENSMUST00000022992	higher	5	19	10440	0.0267917	Wdr67	WD repeat domain 67 Gene [Source:MGI Symbol;Acc:MGI:2684931]
ENSMUST00000110178	higher	5	20	10440	0.0336295	Wdr67	WD repeat domain 67 Gene [Source:MGI Symbol;Acc:MGI:2684931]
ENSMUST00000024730	higher	4	12	10440	0.0355707	Spats1	spermatogenesis associated, serine-rich 1 Gene [Source:MGI Symbol;Acc:MGI:1918270]
ENSMUST00000042296	higher	4	12	10440	0.0355707	Qk	quaking Gene [Source:MGI Symbol;Acc:MGI:97837]
ENSMUST00000063593	higher	4	12	10440	0.0355707	Erich1	glutamate-rich 1 Gene [Source:MGI Symbol;Acc:MGI:3588201]
ENSMUST00000029129	higher	4	12	10440	0.0355707	Mtfr1	mitochondrial fission regulator 1 Gene [Source:MGI Symbol;Acc:MGI:1914722]
ENSMUST00000097742	higher	4	12	10440	0.0355707	Tmem88b	transmembrane protein 88B Gene [Source:MGI Symbol;Acc:MGI:2444329]
ENSMUST00000024639	higher	4	12	10440	0.0355707	Mtap2	microtubule-associated protein 2 Gene [Source:MGI Symbol;Acc:MGI:97175]
ENSMUST00000105466	higher	4	12	10440	0.0355707	P4ha1	procollagen-proline, 2-oxoglutarate 4-dioxygenase (proline 4-hydroxylase), alpha 1 polypeptide Gene [Source:MGI Symbol;Acc:MGI:97463]
ENSMUST00000036665	higher	4	12	10440	0.0355707	Cog6	component of oligomeric golgi complex 6 Gene [Source:MGI Symbol;Acc:MGI:1914792]
ENSMUST00000032541	higher	4	12	10440	0.0355707	2900092C05Rik	RIKEN cDNA 2900092C05 gene Gene [Source:MGI Symbol;Acc:MGI:1920340]
ENSMUST00000004920	higher	4	12	10440	0.0355707	Ulk2	Unc-51 like kinase 2 (C. elegans) Gene [Source:MGI Symbol;Acc:MGI:1352758]
ENSMUST00000117529	higher	4	12	10440	0.0355707	Mtfr1	mitochondrial fission regulator 1 Gene [Source:MGI Symbol;Acc:MGI:1914722]
ENSMUST00000033560	higher	4	12	10440	0.0355707	Ophn1	oligophrenin 1 Gene [Source:MGI Symbol;Acc:MGI:2151070]
ENSMUST00000114688	higher	7	42	10440	0.0355707	NA	NA
ENSMUST00000075431	higher	6	31	10440	0.0372836	NA	NA
ENSMUST00000096121	higher	5	21	10440	0.0384073	Gm5458	predicted gene 5458 Gene [Source:MGI Symbol;Acc:MGI:3646663]
ENSMUST00000053150	higher	5	21	10440	0.0384073	Gm9846	predicted gene 9846 Gene [Source:MGI Symbol;Acc:MGI:3704345]
ENSMUST00000030014	higher	5	21	10440	0.0384073	Ncbp1	nuclear cap binding protein subunit 1 Gene [Source:MGI Symbol;Acc:MGI:1891840]
ENSMUST00000098054	higher	5	21	10440	0.0384073	NA	NA
ENSMUST00000100915	higher	5	21	10440	0.0384073	Gm1973	predicted gene 1973 Gene [Source:MGI Symbol;Acc:MGI:3780141]
ENSMUST00000106319	higher	6	32	10440	0.0430905	Ppih	peptidyl prolyl isomerase H Gene [Source:MGI Symbol;Acc:MGI:106499]
ENSMUST00000109606	higher	3	6	10440	0.0431138	Rhobtb3	Rho-related BTB domain containing 3 Gene [Source:MGI Symbol;Acc:MGI:1920546]
ENSMUST00000017567	higher	4	13	10440	0.0431138	Zfp207	zinc finger protein 207 Gene [Source:MGI Symbol;Acc:MGI:1340045]
ENSMUST00000103181	higher	4	13	10440	0.0431138	Cds2	CDP-diacylglycerol synthase (phosphatidate cytidylyltransferase) 2 Gene [Source:MGI Symbol;Acc:MGI:1332236]
ENSMUST00000070932	higher	5	22	10440	0.0431138	2610036A22Rik	RIKEN cDNA 2610036A22 gene Gene [Source:MGI Symbol;Acc:MGI:1917440]
ENSMUST00000036044	higher	4	13	10440	0.0431138	Zfc3h1	zinc finger, C3H1-type containing Gene [Source:MGI Symbol;Acc:MGI:2446143]
ENSMUST00000106226	higher	4	13	10440	0.0431138	Tial1	Tia1 cytotoxic granule-associated RNA binding protein-like 1 Gene [Source:MGI Symbol;Acc:MGI:107913]
ENSMUST00000045827	higher	4	13	10440	0.0431138	Mtrr	5-methyltetrahydrofolate-homocysteine methyltransferase reductase Gene [Source:MGI Symbol;Acc:MGI:1891037]
ENSMUST00000107715	higher	4	13	10440	0.0431138	Invs	inversin Gene [Source:MGI Symbol;Acc:MGI:1335082]
ENSMUST00000089901	higher	4	13	10440	0.0431138	Ktn1	kinectin 1 Gene [Source:MGI Symbol;Acc:MGI:109153]
ENSMUST00000074854	higher	3	6	10440	0.0431138	Ptpla	protein tyrosine phosphatase-like (proline instead of catalytic arginine), member a Gene [Source:MGI Symbol;Acc:MGI:1353592]
ENSMUST00000113479	higher	4	13	10440	0.0431138	Zfp318	zinc finger protein 318 Gene [Source:MGI Symbol;Acc:MGI:1889348]
ENSMUST00000022391	higher	4	13	10440	0.0431138	Ktn1	kinectin 1 Gene [Source:MGI Symbol;Acc:MGI:109153]
ENSMUST00000115011	higher	3	6	10440	0.0431138	Lman2l	lectin, mannose-binding 2-like Gene [Source:MGI Symbol;Acc:MGI:2443010]
ENSMUST00000112750	higher	4	13	10440	0.0431138	Gm3248	predicted gene 3248 Pseudogene [Source:MGI Symbol;Acc:MGI:3781426]
ENSMUST00000093802	higher	3	6	10440	0.0431138	4922501C03Rik	RIKEN cDNA 4922501C03 gene Gene [Source:MGI Symbol;Acc:MGI:1925343]
ENSMUST00000022923	higher	8	57	10440	0.0431138	Csmd3	CUB and Sushi multiple domains 3 Gene [Source:MGI Symbol;Acc:MGI:2386403]
ENSMUST00000112749	higher	4	13	10440	0.0431138	Gm3248	predicted gene 3248 Pseudogene [Source:MGI Symbol;Acc:MGI:3781426]
ENSMUST00000091526	higher	4	13	10440	0.0431138	Zfp708	zinc finger protein 708 Gene [Source:MGI Symbol;Acc:MGI:3040674]
ENSMUST00000105429	higher	3	6	10440	0.0431138	Pcdh15	protocadherin 15 Gene [Source:MGI Symbol;Acc:MGI:1891428]
ENSMUST00000078084	higher	3	6	10440	0.0431138	D4Wsu53e	DNA segment, Chr 4, Wayne State University 53, expressed Gene [Source:MGI Symbol;Acc:MGI:106498]
ENSMUST00000053959	higher	5	22	10440	0.0431138	Ints6	integrator complex subunit 6 Gene [Source:MGI Symbol;Acc:MGI:1202397]
ENSMUST00000043675	higher	7	45	10440	0.0455282	Atp5l	ATP synthase, H+ transporting, mitochondrial F0 complex, subunit g Gene [Source:MGI Symbol;Acc:MGI:1351597]
