# Supplementary material for: Neuroglobin-Deficiency Exacerbates Hif1A and c-FOS Response, but Does Not Affect Neuronal Survival during Severe Hypoxia In Vivo
Source: PLoS One. 2011 Dec 2;6(12):e28160. doi: 10.1371/journal.pone.0028160 (PMC3229544; doi:10.1371/journal.pone.0028160)
Supplement: Table S14 — Functional annotation of transcripts from Table S13 using g:Profiler. Clicking on a hyperlink in the Q&T column will create a new g:Profiler query using the genes that triggered the annotation. (XLS) [file pone.0028160.s015.xls]

## Sheet: gProf_diff_express_24h (genotyp
p-value	T	Q	Q&T	Q&T/Q	Q&T/T	Term ID	Term domain	Term name
1.33e-06	4479	154	48	0.436	0.011	GO:0006807	BP	nitrogen compound metabolic process
1.36e-05	7390	154	64	0.582	0.009	GO:0044237	BP	cellular metabolic process
8.99e-06	5690	154	54	0.491	0.009	GO:0044260	BP	cellular macromolecule metabolic process
7.07e-07	4387	154	48	0.436	0.011	GO:0034641	BP	cellular nitrogen compound metabolic process
5.53e-07	4070	154	46	0.418	0.011	GO:0006139	BP	nucleobase, nucleoside, nucleotide and nucleic acid metabolic process
1.92e-06	3550	154	41	0.373	0.012	GO:0090304	BP	nucleic acid metabolic process
4.86e-06	2494	154	32	0.291	0.013	GO:0016070	BP	RNA metabolic process
1.29e-06	11154	154	87	0.791	0.008	GO:0005622	CC	intracellular
1.26e-07	12669	154	96	0.873	0.008	GO:0005488	MF	binding
1.76e-06	3812	154	43	0.391	0.011	GO:0043167	MF	ion binding
1.65e-06	3803	154	43	0.391	0.011	GO:0043169	MF	cation binding
1.2e-06	3760	154	43	0.391	0.011	GO:0046872	MF	metal ion binding
7.62e-08	2300	154	34	0.309	0.015	GO:0046914	MF	transition metal ion binding
2.69e-07	1958	154	30	0.273	0.015	GO:0008270	MF	zinc ion binding
4.08e-06	3247	154	38	0.345	0.012	GO:0003676	MF	nucleic acid binding
3.17e-05	2	154	2	0.018	1	GO:0004677	MF	DNA-dependent protein kinase activity
8.05e-06	99	153	6	0.545	0.061	HP:0000256	hp	Macrocephaly
0.000114	836	153	15	0.165	0.018	TF:M00109_4	tf	RNRTKDNGMAAKNN:4
1.18e-05	601	153	14	0.154	0.023	TF:M00109_3	tf	RNRTKDNGMAAKNN:3
1.35e-05	25	153	4	0.044	0.16	TF:M00117_0	tf	NKNTTGCNYAAYNN:0
